# Supplementary material for: CRISPR-mediated deletion of prostate cancer risk-associated CTCF loop anchors identifies repressive chromatin loops
Source: Genome Biol. 2018 Oct 8;19:160. doi: 10.1186/s13059-018-1531-0 (PMC6176514; doi:10.1186/s13059-018-1531-0)
Supplement: Supplementary file 6 — Table S5. RNA-seq analyses. (XLSX 4442 kb) [file 13059_2018_1531_MOESM6_ESM.xlsx]

## Sheet: del Site1 DEG
ensembl	symbol	logFC	PValue	FDR	logCPM
ENSG00000000003.10	TSPAN6	-0.314186	0.359953	0.887244	2.76902
ENSG00000000419.8	DPM1	-0.0228824	0.906649	0.994412	5.61459
ENSG00000000457.9	SCYL3	-0.0546416	0.814996	0.986086	4.60292
ENSG00000000460.12	C1orf112	-0.243818	0.565266	0.955078	4.3513
ENSG00000000971.11	CFH	-0.130625	0.837266	0.988374	-0.507007
ENSG00000001036.9	FUCA2	0.0786971	0.774891	0.983599	6.0263
ENSG00000001084.6	GCLC	-0.506915	0.193474	0.767514	7.25358
ENSG00000001167.10	NFYA	-0.08143	0.730413	0.981983	6.48111
ENSG00000001460.13	STPG1	0.516265	0.0303568	0.393496	3.82003
ENSG00000001461.12	NIPAL3	0.103329	0.565251	0.955078	6.97476
ENSG00000001497.12	LAS1L	0.0891739	0.667157	0.970407	5.94023
ENSG00000001561.6	ENPP4	0.228862	0.38496	0.898633	5.41383
ENSG00000001617.7	SEMA3F	0.695308	0.23087	0.802926	3.6283
ENSG00000001626.10	CFTR	1.26488	0.146304	0.70813	-0.291753
ENSG00000001629.5	ANKIB1	0.278613	0.218689	0.792381	7.34702
ENSG00000001630.11	CYP51A1	0.127598	0.743016	0.981983	3.71094
ENSG00000001631.10	KRIT1	0.520005	0.0433877	0.463158	5.62172
ENSG00000002016.12	RAD52	0.182867	0.430293	0.914694	4.49163
ENSG00000002079.8	MYH16	0.440691	0.372593	0.89313	1.07261
ENSG00000002330.9	BAD	-0.119359	0.633377	0.965814	5.21302
ENSG00000002549.8	LAP3	-0.135684	0.473799	0.930639	5.59953
ENSG00000002586.13	CD99	-0.650395	0.0652102	0.547174	4.99006
ENSG00000002587.5	HS3ST1	-0.526869	0.303256	0.857085	-0.128719
ENSG00000002726.15	AOC1	-0.914108	0.153246	0.715767	0.110548
ENSG00000002745.8	WNT16	0.925407	0.157832	0.720877	0.200919
ENSG00000002746.10	HECW1	0.219142	0.713237	0.979475	-0.758648
ENSG00000002822.11	MAD1L1	0.305728	0.16355	0.728536	5.3305
ENSG00000002834.13	LASP1	-0.168789	0.476712	0.932215	8.00236
ENSG00000002919.10	SNX11	-0.210201	0.399089	0.904115	4.02594
ENSG00000003056.3	M6PR	0.216325	0.393267	0.901814	6.33531
ENSG00000003096.9	KLHL13	0.587705	0.161057	0.724793	2.84848
ENSG00000003137.4	CYP26B1	1.51999	0.0170094	0.317625	-0.495323
ENSG00000003147.13	ICA1	0.346351	0.26283	0.826368	5.90339
ENSG00000003249.9	DBNDD1	0.0390459	0.865845	0.990279	5.22482
ENSG00000003393.10	ALS2	-0.0803782	0.68966	0.974859	4.9771
ENSG00000003400.10	CASP10	0.6095	0.179447	0.749787	0.245331
ENSG00000003402.15	CFLAR	-0.152403	0.512742	0.941309	6.14369
ENSG00000003436.10	TFPI	2.33133	0.000933176	0.0878682	5.38203
ENSG00000003509.11	NDUFAF7	-0.0164945	0.938462	0.997046	3.7931
ENSG00000003756.12	RBM5	0.311437	0.26792	0.830802	6.60547
ENSG00000003987.9	MTMR7	-0.28323	0.345063	0.882077	2.36539
ENSG00000003989.12	SLC7A2	0.0215358	0.962651	0.998071	5.78596
ENSG00000004059.6	ARF5	0.359432	0.1494	0.710981	7.21349
ENSG00000004139.9	SARM1	-0.0367886	0.858581	0.989514	5.37391
ENSG00000004142.7	POLDIP2	0.0465649	0.814225	0.986086	7.18052
ENSG00000004399.8	PLXND1	-0.408205	0.413331	0.908163	4.70857
ENSG00000004455.12	AK2	0.164991	0.360028	0.887268	7.02906
ENSG00000004468.8	CD38	0.785741	0.188473	0.762973	-0.310384
ENSG00000004478.5	FKBP4	0.159292	0.53858	0.947308	8.56925
ENSG00000004487.11	KDM1A	-0.0485767	0.820837	0.987554	6.64421
ENSG00000004534.10	RBM6	0.221161	0.183102	0.755813	6.5485
ENSG00000004660.10	CAMKK1	0.181189	0.640393	0.966137	2.96637
ENSG00000004700.11	RECQL	-0.17777	0.580966	0.957342	5.59591
ENSG00000004766.11	CCDC132	0.649785	0.0101065	0.259647	5.32923
ENSG00000004776.7	HSPB6	-0.478937	0.532823	0.945387	5.93755
ENSG00000004777.14	ARHGAP33	-0.420012	0.324007	0.868944	5.32813
ENSG00000004779.5	NDUFAB1	0.22658	0.436336	0.918307	5.96655
ENSG00000004799.7	PDK4	1.99046	0.0452413	0.47299	5.47097
ENSG00000004809.9	SLC22A16	3.46199	4.60847e-07	0.000766619	0.612664
ENSG00000004838.9	ZMYND10	0.444481	0.37859	0.89596	1.50354
ENSG00000004848.6	ARX	0.827163	0.0348775	0.418634	1.09699
ENSG00000004864.9	SLC25A13	0.456916	0.0731115	0.569711	6.34597
ENSG00000004866.14	ST7	0.609047	0.256938	0.821558	5.77389
ENSG00000004897.7	CDC27	-0.0725814	0.763093	0.982826	6.37748
ENSG00000004961.10	HCCS	0.365629	0.142917	0.705026	4.91242
ENSG00000004975.7	DVL2	-0.359783	0.117476	0.656328	6.35064
ENSG00000005001.5	PRSS22	-0.00589425	0.987832	0.999469	1.96868
ENSG00000005007.8	UPF1	0.299605	0.16228	0.726319	6.6679
ENSG00000005020.8	SKAP2	0.201677	0.326314	0.870099	5.97951
ENSG00000005022.5	SLC25A5	-0.101658	0.694133	0.974926	8.35591
ENSG00000005059.11	CCDC109B	-0.290874	0.391097	0.900765	4.6772
ENSG00000005073.5	HOXA11	2.62691	6.19831e-05	0.0175245	0.161608
ENSG00000005075.11	POLR2J	0.367077	0.153863	0.716951	5.06048
ENSG00000005100.8	DHX33	0.118623	0.554454	0.951903	6.36677
ENSG00000005108.11	THSD7A	0.969506	0.171136	0.737604	-0.058141
ENSG00000005156.7	LIG3	0.167105	0.333907	0.873334	6.36061
ENSG00000005175.5	RPAP3	0.132821	0.489546	0.936658	6.26016
ENSG00000005187.7	ACSM3	-0.215914	0.569303	0.955709	4.70987
ENSG00000005189.15	AC004381.6	-0.0291834	0.947498	0.99802	5.56809
ENSG00000005194.10	CIAPIN1	-0.0189838	0.928729	0.996397	5.72184
ENSG00000005206.12	SPPL2B	-0.00269606	0.991994	0.999585	6.01419
ENSG00000005238.15	FAM214B	-0.0971228	0.746517	0.981983	5.20746
ENSG00000005243.5	COPZ2	-0.854668	0.0194882	0.337284	1.58931
ENSG00000005249.8	PRKAR2B	-0.228167	0.418276	0.910635	5.58518
ENSG00000005302.13	MSL3	0.200611	0.394947	0.902413	5.92772
ENSG00000005339.8	CREBBP	-0.274369	0.306808	0.859635	7.12468
ENSG00000005379.11	BZRAP1	-0.247989	0.434112	0.917094	6.20896
ENSG00000005421.4	PON1	-0.294008	0.271695	0.834188	5.05195
ENSG00000005436.9	GCFC2	-0.251346	0.297658	0.854247	5.79074
ENSG00000005448.12	WDR54	-0.357294	0.145373	0.706879	4.36147
ENSG00000005469.7	CROT	0.401445	0.417399	0.910215	6.67537
ENSG00000005471.11	ABCB4	-0.302719	0.411726	0.907682	0.834228
ENSG00000005483.15	KMT2E	0.441082	0.0614875	0.534401	7.51251
ENSG00000005486.12	RHBDD2	0.401616	0.132835	0.683873	6.63545
ENSG00000005513.9	SOX8	-0.727829	0.377848	0.89596	-0.864914
ENSG00000005700.10	IBTK	-0.302943	0.165005	0.729634	6.9485
ENSG00000005801.12	ZNF195	-0.126164	0.563862	0.955038	5.6478
ENSG00000005810.13	MYCBP2	-0.158772	0.465859	0.928868	6.98562
ENSG00000005812.6	FBXL3	-0.286535	0.177705	0.747755	5.36341
ENSG00000005844.13	ITGAL	-0.12916	0.74279	0.981983	1.66872
ENSG00000005882.7	PDK2	-0.249864	0.313734	0.864141	4.16123
ENSG00000005884.13	ITGA3	0.00920788	0.969966	0.998451	4.99163
ENSG00000005889.11	ZFX	0.00157793	0.994081	0.999585	5.79529
ENSG00000005893.11	LAMP2	-0.0231186	0.916096	0.995541	6.55297
ENSG00000005955.8	GGNBP2	-0.100046	0.568298	0.955475	6.65147
ENSG00000005961.13	ITGA2B	-1.01164	0.0492457	0.48931	1.45121
ENSG00000006007.7	GDE1	0.217193	0.285003	0.843516	6.36227
ENSG00000006015.13	C19orf60	-0.315023	0.0913077	0.607423	5.37722
ENSG00000006016.6	CRLF1	-1.10648	0.0641478	0.544514	2.04317
ENSG00000006042.7	TMEM98	0.244543	0.418741	0.910821	4.4842
ENSG00000006047.8	YBX2	-1.49508	0.0477809	0.482939	5.00779
ENSG00000006062.9	MAP3K14	0.0951867	0.721917	0.981302	4.05639
ENSG00000006071.7	ABCC8	-0.239933	0.732569	0.981983	0.483316
ENSG00000006114.11	SYNRG	0.192084	0.3221	0.867912	6.42788
ENSG00000006118.10	TMEM132A	-0.322495	0.227047	0.798848	6.30108
ENSG00000006125.12	AP2B1	-0.0393944	0.852483	0.989514	8.45208
ENSG00000006194.6	ZNF263	-0.194579	0.430699	0.914694	5.6618
ENSG00000006210.6	CX3CL1	0.188677	0.691935	0.974926	4.72811
ENSG00000006282.15	SPATA20	0.0476358	0.86919	0.990279	7.78572
ENSG00000006283.13	CACNA1G	0.715856	0.300222	0.854756	1.52136
ENSG00000006327.9	TNFRSF12A	-0.2522	0.581065	0.957342	3.4371
ENSG00000006432.11	MAP3K9	0.131996	0.515514	0.941776	5.59656
ENSG00000006451.3	RALA	0.376162	0.139061	0.69586	6.2409
ENSG00000006453.9	BAIAP2L1	0.176528	0.419908	0.911802	5.84187
ENSG00000006459.6	JHDM1D	0.906256	0.0149125	0.302063	5.85232
ENSG00000006468.9	ETV1	1.84456	0.00665104	0.216587	4.17856
ENSG00000006530.11	AGK	0.506703	0.0250186	0.366952	6.04343
ENSG00000006534.11	ALDH3B1	-0.458762	0.13096	0.681667	2.60926
ENSG00000006576.12	PHTF2	0.148722	0.671755	0.970407	7.00153
ENSG00000006607.9	FARP2	0.0389156	0.843736	0.989329	5.57728
ENSG00000006611.11	USH1C	1.79493	0.0047192	0.185291	1.82463
ENSG00000006625.13	GGCT	0.35912	0.207743	0.783232	6.72502
ENSG00000006634.3	DBF4	0.0341328	0.926125	0.996397	5.41239
ENSG00000006638.7	TBXA2R	-0.200583	0.698333	0.975448	1.71592
ENSG00000006652.9	IFRD1	0.569513	0.114576	0.654497	6.54952
ENSG00000006695.6	COX10	-0.00917794	0.968344	0.998451	4.22043
ENSG00000006704.6	GTF2IRD1	0.384426	0.245178	0.812198	5.10248
ENSG00000006712.10	PAF1	-0.0354389	0.872702	0.990554	6.6264
ENSG00000006715.11	VPS41	0.483527	0.0599922	0.528959	6.82881
ENSG00000006740.12	ARHGAP44	-1.46636	0.00881036	0.245746	2.84764
ENSG00000006744.14	ELAC2	0.0915666	0.701575	0.976313	6.66936
ENSG00000006747.10	SCIN	-0.583259	0.435826	0.918037	6.41116
ENSG00000006756.11	ARSD	0.0470395	0.815078	0.986086	5.39202
ENSG00000006757.7	PNPLA4	-0.345608	0.0907007	0.605377	4.37653
ENSG00000006831.9	ADIPOR2	0.0211805	0.920929	0.995541	6.80617
ENSG00000006837.7	CDKL3	0.750214	0.108247	0.64541	0.826225
ENSG00000007038.6	PRSS21	1.03618	0.064131	0.544514	4.16217
ENSG00000007047.10	MARK4	0.00539068	0.983246	0.99892	5.20976
ENSG00000007080.6	CCDC124	0.183481	0.408205	0.906863	6.60888
ENSG00000007168.8	PAFAH1B1	0.230277	0.278281	0.839109	7.30922
ENSG00000007202.10	KIAA0100	0.102273	0.573471	0.95636	8.12812
ENSG00000007255.6	TRAPPC6A	-0.225362	0.298255	0.854404	4.89518
ENSG00000007264.9	MATK	0.128763	0.526628	0.943594	5.85612
ENSG00000007341.14	ST7L	-0.159754	0.464256	0.928868	3.95754
ENSG00000007350.12	TKTL1	-0.0533013	0.926564	0.996397	-0.284941
ENSG00000007372.16	PAX6	-0.671455	0.13739	0.694675	3.50478
ENSG00000007376.3	RPUSD1	-0.171394	0.443973	0.922034	5.33873
ENSG00000007384.11	RHBDF1	0.115058	0.641006	0.966137	5.56978
ENSG00000007392.12	LUC7L	0.138786	0.583497	0.958269	6.21321
ENSG00000007402.7	CACNA2D2	0.0355115	0.87489	0.991387	4.54547
ENSG00000007516.9	BAIAP3	0.213132	0.582989	0.957951	3.86343
ENSG00000007520.3	TSR3	0.162192	0.483125	0.935517	5.34616
ENSG00000007541.10	PIGQ	0.056987	0.810189	0.985702	6.00077
ENSG00000007545.11	CRAMP1L	0.0350947	0.876823	0.991387	4.95085
ENSG00000007866.14	TEAD3	0.156829	0.63719	0.966137	3.95101
ENSG00000007923.11	DNAJC11	0.0134997	0.940395	0.997046	5.94772
ENSG00000007944.10	MYLIP	-1.3139	0.000193065	0.0335095	4.2286
ENSG00000007952.13	NOX1	-0.00787996	0.986525	0.999341	0.0143754
ENSG00000007968.6	E2F2	-0.463262	0.456434	0.927876	6.20936
ENSG00000008018.8	PSMB1	-0.0633355	0.772686	0.983599	6.75585
ENSG00000008056.8	SYN1	0.552015	0.148178	0.710205	3.88003
ENSG00000008083.9	JARID2	0.232503	0.398755	0.904115	4.92319
ENSG00000008086.6	CDKL5	-0.181778	0.612224	0.961781	1.47254
ENSG00000008128.18	CDK11A	0.148825	0.730923	0.981983	0.757879
ENSG00000008130.11	NADK	0.255312	0.234956	0.803948	6.33337
ENSG00000008196.8	TFAP2B	0.971649	0.172321	0.73941	-0.783403
ENSG00000008197.4	TFAP2D	-1.11425	0.0234262	0.359067	-0.202168
ENSG00000008226.15	DLEC1	-0.168035	0.735607	0.981983	-0.199103
ENSG00000008256.11	CYTH3	-0.549592	0.0457218	0.474804	6.30917
ENSG00000008277.10	ADAM22	0.289288	0.302861	0.856696	5.6859
ENSG00000008282.3	SYPL1	-0.0901212	0.722833	0.981516	5.74852
ENSG00000008283.11	CYB561	0.0737141	0.710169	0.977952	7.32279
ENSG00000008294.16	SPAG9	0.0807868	0.663765	0.970407	7.22183
ENSG00000008300.10	CELSR3	-0.0622115	0.794747	0.985106	7.79218
ENSG00000008311.10	AASS	0.68528	0.0256791	0.371697	4.32226
ENSG00000008323.11	PLEKHG6	-0.505432	0.0987861	0.62385	3.94576
ENSG00000008324.6	SS18L2	-0.328517	0.231106	0.802926	4.19501
ENSG00000008382.11	MPND	-0.0212107	0.940342	0.997046	3.67394
ENSG00000008394.8	MGST1	-0.0510787	0.885441	0.991663	6.88901
ENSG00000008405.7	CRY1	0.0684048	0.800335	0.985122	5.06588
ENSG00000008441.12	NFIX	0.243953	0.307308	0.86018	9.89642
ENSG00000008513.10	ST3GAL1	1.795	8.66739e-05	0.0207718	7.48998
ENSG00000008516.12	MMP25	0.597842	0.191605	0.766843	1.43999
ENSG00000008710.13	PKD1	-0.0834105	0.790985	0.984973	6.65813
ENSG00000008735.10	MAPK8IP2	-0.00869275	0.966315	0.998198	7.93982
ENSG00000008838.13	MED24	0.0734804	0.706159	0.976868	6.50564
ENSG00000008853.12	RHOBTB2	0.410467	0.0528775	0.505046	4.85742
ENSG00000008869.7	HEATR5B	0.0347292	0.856585	0.989514	6.09152
ENSG00000008952.12	SEC62	0.1208	0.485782	0.936022	7.19884
ENSG00000008988.5	RPS20	0.282069	0.172126	0.739288	8.05673
ENSG00000009307.11	CSDE1	0.0735888	0.678645	0.972165	9.37529
ENSG00000009335.13	UBE3C	0.311622	0.0966727	0.621033	7.61117
ENSG00000009413.11	REV3L	0.202883	0.449968	0.924677	6.20495
ENSG00000009694.9	TENM1	1.0873	0.018154	0.327659	5.5906
ENSG00000009724.12	MASP2	-0.428514	0.253097	0.817138	2.0872
ENSG00000009780.11	FAM76A	-0.0798701	0.73452	0.981983	4.06695
ENSG00000009790.10	TRAF3IP3	-0.0562172	0.854661	0.989514	1.84347
ENSG00000009830.7	POMT2	-0.0190938	0.920215	0.995541	5.28154
ENSG00000009844.11	VTA1	0.136363	0.55042	0.95149	6.33747
ENSG00000009950.11	MLXIPL	0.0328278	0.959955	0.99802	3.53452
ENSG00000009954.6	BAZ1B	0.317153	0.131083	0.681876	8.25295
ENSG00000010017.9	RANBP9	-0.208546	0.298244	0.854404	6.22227
ENSG00000010030.9	ETV7	-0.640152	0.228552	0.801457	1.23765
ENSG00000010072.11	SPRTN	-0.29434	0.162939	0.727161	5.20958
ENSG00000010165.15	METTL13	-0.0866468	0.707062	0.976965	6.11714
ENSG00000010219.9	DYRK4	0.123518	0.601016	0.960541	3.93736
ENSG00000010244.12	ZNF207	-0.0888672	0.610617	0.961781	7.60991
ENSG00000010256.6	UQCRC1	0.0253406	0.90315	0.993667	7.87523
ENSG00000010270.9	STARD3NL	0.273626	0.299228	0.854667	6.96285
ENSG00000010278.7	CD9	0.881752	0.0196505	0.337886	7.10941
ENSG00000010292.8	NCAPD2	-0.265243	0.540095	0.948063	7.99748
ENSG00000010295.15	IFFO1	-0.182002	0.676643	0.971657	3.54719
ENSG00000010310.4	GIPR	0.164655	0.727594	0.981983	1.078
ENSG00000010318.15	PHF7	-0.290613	0.286637	0.844553	2.96929
ENSG00000010319.2	SEMA3G	-0.0110698	0.98104	0.99892	1.98655
ENSG00000010322.11	NISCH	0.0786232	0.696337	0.975086	6.75855
ENSG00000010327.6	STAB1	-1.05614	0.0325635	0.407508	-0.279528
ENSG00000010361.9	FUZ	0.388625	0.180163	0.751246	3.20877
ENSG00000010379.11	SLC6A13	0.704554	0.313193	0.863875	-1.08238
ENSG00000010404.13	IDS	-0.375075	0.247125	0.814168	5.6541
ENSG00000010438.12	PRSS3	1.01023	0.253081	0.817138	0.485121
ENSG00000010539.7	ZNF200	0.0864078	0.732202	0.981983	4.13141
ENSG00000010610.5	CD4	-1.06974	0.0180065	0.327067	1.45269
ENSG00000010626.10	LRRC23	0.763456	0.0181857	0.327934	3.37714
ENSG00000010704.14	HFE	1.71889	0.0132054	0.286295	-0.432614
ENSG00000010803.12	SCMH1	0.0214448	0.905849	0.994257	6.0938
ENSG00000010810.13	FYN	0.45713	0.421351	0.912673	3.15029
ENSG00000010818.4	HIVEP2	-0.988646	0.026025	0.372252	6.2933
ENSG00000010932.11	FMO1	0.0595729	0.919357	0.995541	1.0448
ENSG00000011007.8	TCEB3	-0.272584	0.177006	0.7469	6.96866
ENSG00000011009.6	LYPLA2	0.396274	0.105569	0.639178	5.31175
ENSG00000011021.17	CLCN6	-0.354795	0.232769	0.803587	4.65296
ENSG00000011028.9	MRC2	0.68503	0.248811	0.815961	2.30722
ENSG00000011105.7	TSPAN9	-0.120276	0.800629	0.985122	1.22489
ENSG00000011114.10	BTBD7	-0.0390765	0.825827	0.988374	6.07455
ENSG00000011132.7	APBA3	0.130338	0.584264	0.958426	4.13024
ENSG00000011143.12	MKS1	0.0351679	0.872189	0.99042	4.3102
ENSG00000011198.3	ABHD5	-0.152393	0.630981	0.964648	4.51936
ENSG00000011201.6	KAL1	1.18896	0.000847521	0.0839623	3.61551
ENSG00000011243.13	AKAP8L	0.0325597	0.886939	0.991751	6.11967
ENSG00000011258.11	MBTD1	-0.0337778	0.881468	0.991663	5.54146
ENSG00000011260.9	UTP18	-0.0938353	0.681214	0.972693	5.51527
ENSG00000011275.14	RNF216	0.382201	0.144721	0.706805	6.1115
ENSG00000011295.11	TTC19	-0.0994807	0.56376	0.955038	6.60257
ENSG00000011304.12	PTBP1	-0.0671652	0.752174	0.982108	8.74534
ENSG00000011332.15	DPF1	0.451474	0.444718	0.922813	1.35604
ENSG00000011347.5	SYT7	0.695501	0.0128082	0.283905	6.78358
ENSG00000011376.5	LARS2	-0.0168712	0.93175	0.996397	6.07109
ENSG00000011405.9	PIK3C2A	0.0367592	0.880544	0.991618	6.97034
ENSG00000011422.7	PLAUR	-0.381137	0.40264	0.905054	2.48317
ENSG00000011426.6	ANLN	0.216566	0.729661	0.981983	7.40757
ENSG00000011451.13	WIZ	0.0226331	0.898186	0.993024	6.70436
ENSG00000011454.12	RABGAP1	0.296309	0.137893	0.695364	6.2808
ENSG00000011465.12	DCN	0.301405	0.675371	0.971326	1.39719
ENSG00000011478.7	QPCTL	-0.195812	0.503107	0.939532	3.77812
ENSG00000011485.10	PPP5C	0.0460439	0.79381	0.985106	6.5254
ENSG00000011523.9	CEP68	-0.0054958	0.982147	0.99892	4.56474
ENSG00000011566.10	MAP4K3	-0.0921913	0.581824	0.957648	5.65668
ENSG00000011590.9	ZBTB32	0.208834	0.631018	0.964648	1.07555
ENSG00000011638.6	TMEM159	-0.136637	0.600408	0.960541	3.04108
ENSG00000011677.8	GABRA3	-0.191272	0.540826	0.948459	3.18873
ENSG00000012048.15	BRCA1	-0.03507	0.940883	0.997046	6.86347
ENSG00000012061.11	ERCC1	0.145391	0.555225	0.951903	4.98669
ENSG00000012171.13	SEMA3B	-0.161754	0.657039	0.968816	4.74748
ENSG00000012174.7	MBTPS2	-0.203393	0.346999	0.882702	5.72658
ENSG00000012211.8	PRICKLE3	-0.153648	0.515053	0.941776	4.40026
ENSG00000012232.4	EXTL3	-0.01589	0.934295	0.996397	6.48267
ENSG00000012504.9	NR1H4	-1.6408	0.000641321	0.0692003	1.98133
ENSG00000012660.9	ELOVL5	0.205429	0.449822	0.924677	7.81608
ENSG00000012817.11	KDM5D	-0.431232	0.0526199	0.50418	6.20683
ENSG00000012822.11	CALCOCO1	0.065812	0.873628	0.991042	6.08464
ENSG00000012963.9	UBR7	-0.101452	0.687588	0.97414	6.35511
ENSG00000012983.7	MAP4K5	-0.220317	0.289121	0.846375	6.20961
ENSG00000013016.10	EHD3	-0.789472	0.0824464	0.588147	1.64705
ENSG00000013275.3	PSMC4	-0.0140578	0.960372	0.99802	6.68561
ENSG00000013288.4	MAN2B2	0.210682	0.325205	0.869075	5.90327
ENSG00000013293.5	SLC7A14	0.820106	0.182719	0.755021	-0.281616
ENSG00000013297.6	CLDN11	0.924752	0.0901022	0.604942	5.17685
ENSG00000013306.11	SLC25A39	-0.0027804	0.98976	0.999474	8.26666
ENSG00000013364.14	MVP	0.182345	0.444272	0.922344	7.23931
ENSG00000013374.11	NUB1	0.224695	0.264359	0.828176	6.36964
ENSG00000013375.11	PGM3	-0.225074	0.29625	0.853236	6.21064
ENSG00000013392.6	RWDD2A	-0.213326	0.496379	0.938334	4.72672
ENSG00000013441.11	CLK1	-0.798763	0.033178	0.41084	6.50162
ENSG00000013503.5	POLR3B	0.151148	0.472783	0.930371	5.5857
ENSG00000013523.5	ANGEL1	-0.419683	0.156395	0.719243	4.79897
ENSG00000013561.13	RNF14	-0.121377	0.58643	0.958846	6.2632
ENSG00000013563.9	DNASE1L1	0.101183	0.658118	0.968991	4.21799
ENSG00000013573.12	DDX11	-0.249758	0.461202	0.928362	5.74173
ENSG00000013583.4	HEBP1	-0.763094	0.0115018	0.272688	4.83028
ENSG00000013588.5	GPRC5A	2.2526	0.00203542	0.123875	2.97221
ENSG00000013619.9	MAMLD1	-0.316835	0.440446	0.920969	2.56884
ENSG00000013725.10	CD6	0.139393	0.767593	0.983515	1.37424
ENSG00000013810.14	TACC3	-0.377307	0.472309	0.93021	7.04933
ENSG00000014123.9	UFL1	-0.447445	0.0296756	0.390647	5.74472
ENSG00000014138.4	POLA2	-0.24226	0.500528	0.939532	5.88693
ENSG00000014164.6	ZC3H3	-0.0189949	0.92041	0.995541	5.10995
ENSG00000014216.11	CAPN1	-0.157702	0.487164	0.936244	7.06298
ENSG00000014257.11	ACPP	0.0214162	0.965748	0.998198	3.74841
ENSG00000014641.13	MDH1	0.172527	0.439555	0.920947	7.3531
ENSG00000014824.9	SLC30A9	-0.296201	0.0735379	0.570681	7.47728
ENSG00000014914.15	MTMR11	0.269568	0.344664	0.881609	4.20635
ENSG00000014919.8	COX15	-0.0681832	0.701834	0.976313	6.62922
ENSG00000015133.14	CCDC88C	-0.160148	0.505096	0.939532	4.64047
ENSG00000015153.10	YAF2	-0.357002	0.111328	0.650375	4.54026
ENSG00000015171.14	ZMYND11	-0.0757094	0.658985	0.969264	7.31276
ENSG00000015285.6	WAS	-0.204858	0.493982	0.937001	1.64036
ENSG00000015475.14	BID	0.840927	0.0158983	0.310623	3.35262
ENSG00000015479.13	MATR3	-0.032004	0.847373	0.989514	8.66406
ENSG00000015520.10	NPC1L1	-1.2861	0.090565	0.605377	1.95197
ENSG00000015532.5	XYLT2	-0.0493495	0.835703	0.988374	4.45911
ENSG00000015592.12	STMN4	0.240879	0.778091	0.983599	2.75956
ENSG00000015676.13	NUDCD3	0.231598	0.220675	0.793806	7.12822
ENSG00000016082.10	ISL1	-0.871558	0.0705238	0.565355	1.4866
ENSG00000016391.6	CHDH	-0.567319	0.0200325	0.339487	5.77943
ENSG00000016402.8	IL20RA	0.377663	0.510628	0.941233	-0.174637
ENSG00000016864.12	GLT8D1	-0.0871007	0.680146	0.972569	5.73222
ENSG00000017260.15	ATP2C1	0.136278	0.574692	0.956797	7.32198
ENSG00000017373.11	SRCIN1	-0.0852131	0.775609	0.983599	5.2178
ENSG00000017427.11	IGF1	2.27553	1.60122e-05	0.0086388	4.34761
ENSG00000017483.10	SLC38A5	-0.0810292	0.882496	0.991663	-0.160736
ENSG00000017621.11	MAGIX	-0.264598	0.587585	0.958962	0.972572
ENSG00000017797.7	RALBP1	-0.0473834	0.815991	0.986086	6.28932
ENSG00000018189.8	RUFY3	0.0404523	0.845846	0.989329	5.1258
ENSG00000018236.10	CNTN1	0.630059	0.352297	0.885605	3.24525
ENSG00000018280.12	SLC11A1	0.633826	0.137127	0.693995	1.41106
ENSG00000018408.10	WWTR1	-0.233946	0.526359	0.943594	3.41868
ENSG00000018510.8	AGPS	0.166169	0.508969	0.941029	5.04768
ENSG00000018610.9	CXorf56	-0.118426	0.577511	0.957342	4.46073
ENSG00000018699.7	TTC27	0.196396	0.434247	0.917094	4.69168
ENSG00000018869.12	ZNF582	0.118961	0.699524	0.975839	2.95408
ENSG00000019102.7	VSIG2	-0.713309	0.142674	0.704497	-0.217941
ENSG00000019144.12	PHLDB1	-0.16995	0.410419	0.907541	5.18681
ENSG00000019485.8	PRDM11	-0.45441	0.233548	0.803948	1.26234
ENSG00000019991.11	HGF	0.298089	0.694654	0.974926	6.82574
ENSG00000019995.6	ZRANB1	-0.116677	0.569375	0.955709	5.90876
ENSG00000020129.11	NCDN	0.304967	0.230163	0.802926	6.13894
ENSG00000020219.8	CCT8L1P	-0.312588	0.580307	0.957342	-0.670776
ENSG00000020256.15	ZFP64	-0.106404	0.634771	0.965874	4.96187
ENSG00000020426.6	MNAT1	-0.12539	0.535789	0.946682	4.54252
ENSG00000020577.9	SAMD4A	0.18134	0.555254	0.951903	4.71483
ENSG00000020922.8	MRE11A	-0.202608	0.439348	0.920947	3.83959
ENSG00000021300.9	PLEKHB1	-0.756726	0.0624226	0.537799	4.31684
ENSG00000021355.8	SERPINB1	-0.0724451	0.765943	0.983212	6.07203
ENSG00000021488.8	SLC7A9	0.934105	0.0580644	0.521077	-0.0355339
ENSG00000021574.7	SPAST	-0.319126	0.114338	0.654176	5.23522
ENSG00000021762.15	OSBPL5	-0.708939	0.0140415	0.297555	5.47165
ENSG00000021776.6	AQR	0.112616	0.535792	0.946682	6.292
ENSG00000021826.10	CPS1	-3.00103	7.04007e-05	0.01789	3.51441
ENSG00000022277.8	RTFDC1	0.108623	0.58828	0.958962	5.57656
ENSG00000022355.10	GABRA1	-0.67235	0.244465	0.811831	5.13871
ENSG00000022567.5	SLC45A4	0.842882	0.00293005	0.148407	3.79305
ENSG00000022840.11	RNF10	0.00150212	0.993728	0.999585	7.74023
ENSG00000022976.11	ZNF839	-0.113524	0.555129	0.951903	5.45459
ENSG00000023041.7	ZDHHC6	-0.0527215	0.796391	0.985106	4.86796
ENSG00000023191.12	RNH1	-0.206428	0.328488	0.870749	6.7908
ENSG00000023228.9	NDUFS1	-0.111792	0.563779	0.955038	7.89667
ENSG00000023287.8	RB1CC1	0.079047	0.730522	0.981983	6.55665
ENSG00000023318.7	ERP44	-0.0410805	0.840627	0.988956	6.7477
ENSG00000023330.10	ALAS1	0.213565	0.450078	0.924677	6.09686
ENSG00000023445.9	BIRC3	0.00459136	0.990612	0.999585	1.66164
ENSG00000023516.7	AKAP11	-0.188111	0.328618	0.870818	6.9464
ENSG00000023572.4	GLRX2	-0.0581563	0.860324	0.989899	4.32033
ENSG00000023608.4	SNAPC1	0.253548	0.307827	0.860501	3.41755
ENSG00000023697.8	DERA	-0.239797	0.535797	0.946682	4.93032
ENSG00000023734.6	STRAP	0.0684094	0.724752	0.981983	7.95396
ENSG00000023839.6	ABCC2	-0.00759312	0.988979	0.999469	4.63502
ENSG00000023892.9	DEF6	-0.503071	0.0674368	0.553753	4.37593
ENSG00000023902.9	PLEKHO1	0.00096442	0.997974	0.999758	4.03538
ENSG00000023909.5	GCLM	0.133409	0.756371	0.982554	5.32743
ENSG00000024048.6	UBR2	0.170233	0.322502	0.868093	6.56252
ENSG00000024422.7	EHD2	0.572641	0.104588	0.637778	1.27237
ENSG00000024526.12	DEPDC1	-0.305695	0.610936	0.961781	5.92028
ENSG00000024862.12	CCDC28A	0.148519	0.543527	0.948839	3.63331
ENSG00000025039.10	RRAGD	-0.00427423	0.987974	0.999469	6.39486
ENSG00000025156.8	HSF2	-0.253205	0.228935	0.802183	4.56464
ENSG00000025293.11	PHF20	-0.0259013	0.877183	0.991387	6.40801
ENSG00000025423.7	HSD17B6	-0.463234	0.329161	0.871563	1.6691
ENSG00000025434.14	NR1H3	0.797304	0.0262217	0.373077	3.34757
ENSG00000025708.8	TYMP	-0.12469	0.640876	0.966137	3.70254
ENSG00000025770.14	NCAPH2	-0.382196	0.279222	0.840207	5.84425
ENSG00000025772.7	TOMM34	0.153681	0.508224	0.940322	5.87476
ENSG00000025796.9	SEC63	-0.0728972	0.729694	0.981983	6.70427
ENSG00000025800.9	KPNA6	0.251399	0.173335	0.740291	7.10753
ENSG00000026025.9	VIM	-1.07823	0.0226414	0.3531	3.53182
ENSG00000026036.16	RTEL1-TNFRSF6B	0.133008	0.749681	0.982005	3.04229
ENSG00000026103.15	FAS	-0.694183	0.10459	0.637778	3.59265
ENSG00000026297.11	RNASET2	0.305794	0.33691	0.874812	3.36516
ENSG00000026508.12	CD44	-0.0675563	0.877787	0.991387	6.41518
ENSG00000026559.9	KCNG1	-4.93836	5.05221e-06	0.00420217	2.22181
ENSG00000026652.9	AGPAT4	-0.89783	0.0768901	0.578789	1.40859
ENSG00000026950.12	BTN3A1	-1.18541	0.0116334	0.273508	2.74995
ENSG00000027001.7	MIPEP	0.123265	0.697251	0.975205	4.93456
ENSG00000027075.9	PRKCH	0.0533615	0.925002	0.996189	2.59439
ENSG00000027697.8	IFNGR1	0.190213	0.365171	0.889076	4.8749
ENSG00000027847.9	B4GALT7	-0.287252	0.208378	0.783804	4.06598
ENSG00000027869.7	SH2D2A	0.626903	0.212338	0.787689	0.492412
ENSG00000028116.12	VRK2	-0.0163233	0.93609	0.996397	4.96728
ENSG00000028203.13	VEZT	0.126861	0.490674	0.937001	7.16452
ENSG00000028277.16	POU2F2	1.06209	0.0471526	0.481388	0.308031
ENSG00000028310.13	BRD9	-0.0868863	0.619028	0.962834	5.55635
ENSG00000028528.10	SNX1	0.024539	0.911441	0.995277	7.28502
ENSG00000028839.5	TBPL1	0.399434	0.151375	0.713977	4.80222
ENSG00000029153.10	ARNTL2	-0.450195	0.374314	0.893856	4.17232
ENSG00000029363.11	BCLAF1	-0.195805	0.349705	0.884006	8.0695
ENSG00000029364.7	SLC39A9	-0.102351	0.547249	0.950388	6.841
ENSG00000029534.15	ANK1	0.182921	0.682946	0.972862	4.29815
ENSG00000029639.6	TFB1M	-0.161021	0.552922	0.951903	3.09443
ENSG00000029725.12	RABEP1	-0.156085	0.356197	0.886254	6.91726
ENSG00000029993.10	HMGB3	-0.341708	0.302745	0.85669	6.13217
ENSG00000030066.9	NUP160	-0.0249645	0.922944	0.995773	6.64304
ENSG00000030110.8	BAK1	-0.0225181	0.936145	0.996397	3.26069
ENSG00000030419.12	IKZF2	-0.20194	0.587053	0.958846	2.5972
ENSG00000030582.12	GRN	-0.211275	0.404324	0.905735	6.67304
ENSG00000031003.6	FAM13B	0.0950083	0.665662	0.970407	5.73636
ENSG00000031081.6	ARHGAP31	0.7338	0.0199188	0.339404	3.52131
ENSG00000031544.10	NR2E3	0.426204	0.380318	0.897005	0.153322
ENSG00000031691.6	CENPQ	-0.339984	0.375984	0.895149	4.07209
ENSG00000031698.8	SARS	-0.0349452	0.896951	0.993024	7.83842
ENSG00000031823.10	RANBP3	-0.0637392	0.706885	0.976965	6.21191
ENSG00000032219.14	ARID4A	0.223811	0.30137	0.855283	5.65527
ENSG00000032389.8	TSSC1	-0.0499972	0.811475	0.9858	4.96319
ENSG00000032444.11	PNPLA6	0.0491556	0.832661	0.988374	6.45658
ENSG00000032742.13	IFT88	0.473873	0.121893	0.66591	4.76413
ENSG00000033011.7	ALG1	0.152132	0.476724	0.932215	4.02334
ENSG00000033030.9	ZCCHC8	-0.167107	0.47178	0.93021	5.98801
ENSG00000033050.3	ABCF2	0.522043	0.0411677	0.452527	6.81856
ENSG00000033100.10	CHPF2	0.187182	0.503253	0.939532	5.61275
ENSG00000033122.14	LRRC7	0.0981288	0.806954	0.985164	1.89757
ENSG00000033170.12	FUT8	-0.340761	0.186371	0.759619	4.08119
ENSG00000033178.8	UBA6	0.447219	0.0534887	0.50629	6.8169
ENSG00000033327.8	GAB2	0.390053	0.318493	0.866769	4.61606
ENSG00000033627.10	ATP6V0A1	0.0536006	0.814988	0.986086	6.86471
ENSG00000033800.9	PIAS1	0.347945	0.0774371	0.580938	5.02953
ENSG00000033867.12	SLC4A7	-0.00147073	0.995832	0.999585	4.43595
ENSG00000034053.10	APBA2	0.0357845	0.899097	0.993512	5.36319
ENSG00000034063.9	UHRF1	0.113189	0.827652	0.988374	4.96698
ENSG00000034152.14	MAP2K3	0.121608	0.585768	0.958846	6.04007
ENSG00000034510.4	TMSB10	-0.192743	0.487113	0.936244	10.816
ENSG00000034533.7	ASTE1	0.087881	0.736258	0.981983	2.91202
ENSG00000034677.7	RNF19A	0.272951	0.650407	0.967036	5.79896
ENSG00000034693.10	PEX3	-0.132066	0.565104	0.955078	4.69629
ENSG00000034713.3	GABARAPL2	-0.00247252	0.990025	0.999585	6.18548
ENSG00000035115.17	SH3YL1	-0.0231506	0.94185	0.997046	4.2578
ENSG00000035141.3	FAM136A	-0.0022539	0.990643	0.999585	6.59707
ENSG00000035403.12	VCL	-0.275016	0.176328	0.745103	7.3744
ENSG00000035499.8	DEPDC1B	-0.320751	0.609352	0.961781	4.57058
ENSG00000035664.7	DAPK2	-0.183321	0.665256	0.970407	2.21593
ENSG00000035681.3	NSMAF	-0.0616488	0.772497	0.983599	5.3368
ENSG00000035687.9	ADSS	-0.0474133	0.819638	0.98721	5.58183
ENSG00000035862.8	TIMP2	-0.0724796	0.904811	0.993921	1.03365
ENSG00000035928.10	RFC1	0.0115353	0.953357	0.99802	7.0878
ENSG00000036054.8	TBC1D23	-0.110392	0.62823	0.964314	4.14417
ENSG00000036257.8	CUL3	-0.0136445	0.938783	0.997046	7.13706
ENSG00000036448.5	MYOM2	0.997493	0.142446	0.703836	0.532121
ENSG00000036530.4	CYP46A1	-0.339428	0.551111	0.951585	0.793959
ENSG00000036549.8	ZZZ3	0.113933	0.586978	0.958846	6.49184
ENSG00000036672.11	USP2	-1.33211	0.000460364	0.0587428	1.56749
ENSG00000037042.8	TUBG2	0.341808	0.202699	0.779329	3.8373
ENSG00000037241.3	RPL26L1	0.124543	0.598133	0.960541	3.37056
ENSG00000037280.11	FLT4	-1.6529	0.0099121	0.257235	0.766334
ENSG00000037474.10	NSUN2	0.0809444	0.643645	0.966237	7.07729
ENSG00000037637.6	FBXO42	0.13315	0.588239	0.958962	6.16382
ENSG00000037749.7	MFAP3	0.0539897	0.798108	0.985122	6.40706
ENSG00000037757.9	MRI1	0.0293103	0.907157	0.99449	4.41313
ENSG00000037897.12	METTL1	-0.365938	0.140107	0.697633	4.89304
ENSG00000037965.4	HOXC8	-0.547973	0.250758	0.816266	2.51858
ENSG00000038002.4	AGA	-0.271486	0.377996	0.89596	3.12067
ENSG00000038210.9	PI4K2B	-0.594869	0.0431034	0.461685	5.62778
ENSG00000038219.8	BOD1L1	-0.450485	0.0627135	0.539142	6.64121
ENSG00000038274.12	MAT2B	0.00313177	0.987074	0.999449	6.06125
ENSG00000038295.3	TLL1	-0.595213	0.12096	0.663536	1.58763
ENSG00000038358.10	EDC4	0.028624	0.883593	0.991663	6.34065
ENSG00000038382.13	TRIO	0.0775432	0.721851	0.981302	6.55282
ENSG00000038427.11	VCAN	-0.672515	0.22072	0.793806	3.89959
ENSG00000038532.10	CLEC16A	0.156487	0.377107	0.895546	5.69762
ENSG00000038945.10	MSR1	1.15456	0.12333	0.668863	-0.79275
ENSG00000039068.14	CDH1	-0.0547221	0.777967	0.983599	8.73786
ENSG00000039123.11	SKIV2L2	0.142087	0.455451	0.927348	6.52923
ENSG00000039139.9	DNAH5	1.9873	0.00549172	0.196814	2.21913
ENSG00000039319.12	ZFYVE16	0.184327	0.305215	0.859133	5.98047
ENSG00000039523.13	FAM65A	-0.746138	0.000253576	0.0392395	5.8923
ENSG00000039560.9	RAI14	-0.582315	0.0182913	0.327942	5.48062
ENSG00000039650.5	PNKP	-0.0988819	0.695268	0.974926	6.09527
ENSG00000039987.2	BEST2	-0.771235	0.093441	0.612893	0.319817
ENSG00000040199.14	PHLPP2	-0.0291316	0.896419	0.993024	4.95649
ENSG00000040275.12	SPDL1	-0.164629	0.673531	0.97048	5.18348
ENSG00000040341.13	STAU2	-0.0270963	0.893425	0.993024	5.50858
ENSG00000040487.8	PQLC2	-0.171951	0.520091	0.943238	3.86444
ENSG00000040531.10	CTNS	0.00425371	0.98449	0.99892	4.26597
ENSG00000040608.9	RTN4R	0.0638199	0.867743	0.990279	2.7244
ENSG00000040633.8	PHF23	0.0626983	0.743	0.981983	6.14454
ENSG00000040731.6	CDH10	-1.29767	0.0660894	0.550251	0.8674
ENSG00000040933.11	INPP4A	-0.0751939	0.76273	0.982826	5.07397
ENSG00000041353.5	RAB27B	-0.706595	0.09633	0.619823	6.09498
ENSG00000041357.11	PSMA4	0.0465208	0.849145	0.989514	7.2483
ENSG00000041802.6	LSG1	0.149264	0.396978	0.902959	5.99043
ENSG00000041880.10	PARP3	0.0766174	0.816472	0.986086	3.55438
ENSG00000041982.10	TNC	2.66034	0.00519121	0.19119	6.02815
ENSG00000041988.11	THAP3	0.23486	0.294381	0.852174	3.76473
ENSG00000042062.7	FAM65C	0.69333	0.132296	0.683225	0.516403
ENSG00000042088.9	TDP1	-0.109343	0.674658	0.97093	4.98283
ENSG00000042286.10	AIFM2	-0.0385871	0.941916	0.997046	2.22411
ENSG00000042317.12	SPATA7	-0.106739	0.794399	0.985106	3.03523
ENSG00000042429.6	MED17	-0.347935	0.0918398	0.608667	5.58272
ENSG00000042445.9	RETSAT	-0.304939	0.247863	0.815533	5.17736
ENSG00000042493.11	CAPG	-0.643299	0.0727934	0.569711	2.31059
ENSG00000042753.7	AP2S1	-0.0447417	0.885939	0.991663	6.7116
ENSG00000042781.8	USH2A	0.113256	0.843916	0.989329	-0.573677
ENSG00000043093.9	DCUN1D1	0.109644	0.572431	0.95636	5.26537
ENSG00000043143.16	PHF15	-0.11107	0.591779	0.959255	6.13713
ENSG00000043355.6	ZIC2	-0.311467	0.380523	0.897005	4.82224
ENSG00000043514.11	TRIT1	0.294636	0.152641	0.714477	4.87362
ENSG00000043591.4	ADRB1	0.623508	0.207007	0.783232	0.651103
ENSG00000044090.4	CUL7	0.100937	0.695972	0.974926	6.16692
ENSG00000044115.16	CTNNA1	-0.0863296	0.66995	0.970407	8.79328
ENSG00000044446.7	PHKA2	-0.0962489	0.682653	0.972862	4.174
ENSG00000044459.10	CNTLN	-0.443031	0.20205	0.778332	4.87659
ENSG00000044524.6	EPHA3	0.790712	0.230339	0.802926	7.94266
ENSG00000044574.7	HSPA5	-0.808313	0.0810406	0.585711	9.8762
ENSG00000046604.8	DSG2	-0.34373	0.20727	0.783232	6.79598
ENSG00000046647.9	GEMIN8	-0.175904	0.480689	0.933984	4.17353
ENSG00000046651.10	OFD1	0.118638	0.557253	0.952342	5.32287
ENSG00000046653.10	GPM6B	0.548932	0.125805	0.674334	3.13171
ENSG00000046889.14	PREX2	0.539592	0.363361	0.888531	1.33816
ENSG00000047056.10	WDR37	0.00879606	0.964607	0.998198	5.19058
ENSG00000047188.11	YTHDC2	-0.0354496	0.842927	0.989329	6.43528
ENSG00000047230.10	CTPS2	-0.127367	0.506674	0.939532	5.04109
ENSG00000047249.12	ATP6V1H	0.07922	0.734464	0.981983	5.7684
ENSG00000047315.10	POLR2B	-0.00746012	0.966222	0.998198	7.37855
ENSG00000047346.8	FAM214A	0.135422	0.581395	0.957342	4.87513
ENSG00000047365.7	ARAP2	0.0347229	0.872358	0.99042	4.20566
ENSG00000047410.9	TPR	-0.076069	0.664293	0.970407	8.82193
ENSG00000047457.9	CP	1.08558	0.167834	0.732726	1.04966
ENSG00000047578.8	KIAA0556	0.209749	0.307324	0.86018	6.24995
ENSG00000047579.15	DTNBP1	0.0317593	0.872047	0.99042	4.16419
ENSG00000047597.5	XK	-0.18212	0.584444	0.958445	2.23834
ENSG00000047617.10	ANO2	-0.480154	0.486537	0.936236	-1.10842
ENSG00000047621.7	C12orf4	0.111964	0.625976	0.963953	5.46613
ENSG00000047634.10	SCML1	-0.635458	0.0077244	0.235052	5.73568
ENSG00000047644.13	WWC3	0.50082	0.0540244	0.507499	3.6836
ENSG00000047648.17	ARHGAP6	0.956922	0.0338201	0.412663	6.84501
ENSG00000047662.4	FAM184B	-0.0795276	0.869261	0.990279	0.776135
ENSG00000047849.17	MAP4	0.0641596	0.725487	0.981983	9.11788
ENSG00000047932.9	GOPC	-0.0853918	0.638103	0.966137	6.31916
ENSG00000048028.7	USP28	-0.397509	0.128902	0.678291	4.67197
ENSG00000048052.17	HDAC9	0.575769	0.211869	0.787421	1.70308
ENSG00000048140.13	TSPAN17	-0.00575116	0.979604	0.99892	5.87517
ENSG00000048162.15	NOP16	-0.100714	0.666072	0.970407	5.88075
ENSG00000048342.11	CC2D2A	0.123243	0.744058	0.981983	3.23213
ENSG00000048392.7	RRM2B	-0.140707	0.562352	0.954713	5.95241
ENSG00000048405.5	ZNF800	0.207351	0.358617	0.886964	6.009
ENSG00000048471.9	SNX29	-0.0746393	0.715812	0.980117	4.28387
ENSG00000048540.10	LMO3	0.910373	0.0428834	0.460979	0.699066
ENSG00000048544.5	MRPS10	0.0966539	0.687941	0.974225	4.99682
ENSG00000048649.9	RSF1	0.070568	0.762212	0.982826	6.38277
ENSG00000048707.9	VPS13D	0.118698	0.519343	0.943238	7.19845
ENSG00000048828.12	FAM120A	0.0838334	0.597209	0.960541	8.22104
ENSG00000048991.12	R3HDM1	-0.0733838	0.701327	0.976313	5.37168
ENSG00000049089.9	COL9A2	-1.72578	0.0425004	0.459584	3.44682
ENSG00000049130.9	KITLG	0.522399	0.246076	0.813691	4.29434
ENSG00000049167.9	ERCC8	-0.00321452	0.989156	0.999469	3.44686
ENSG00000049192.10	ADAMTS6	0.15723	0.772405	0.983599	-0.219435
ENSG00000049239.8	H6PD	-0.207606	0.522181	0.943238	5.60762
ENSG00000049245.8	VAMP3	0.0332213	0.876687	0.991387	5.79525
ENSG00000049246.10	PER3	-1.89619	0.000468169	0.0587428	1.38714
ENSG00000049283.13	EPN3	0.301914	0.456776	0.927876	5.88113
ENSG00000049323.11	LTBP1	0.297874	0.376932	0.895546	3.22758
ENSG00000049449.4	RCN1	-0.245237	0.463512	0.928868	5.98222
ENSG00000049540.12	ELN	1.21448	0.0946982	0.615086	0.0105661
ENSG00000049541.6	RFC2	0.229312	0.564857	0.955078	6.6953
ENSG00000049618.17	ARID1B	-0.160414	0.422329	0.91293	6.69429
ENSG00000049656.9	CLPTM1L	0.200712	0.343838	0.880978	6.76005
ENSG00000049759.12	NEDD4L	0.224474	0.452759	0.925583	7.55716
ENSG00000049768.10	FOXP3	0.275547	0.496431	0.938334	0.489692
ENSG00000049769.8	PPP1R3F	0.335714	0.39927	0.904125	3.76164
ENSG00000049860.9	HEXB	-0.0845969	0.699623	0.975839	6.55319
ENSG00000049883.10	PTCD2	0.00117842	0.996023	0.999585	3.86965
ENSG00000050030.9	KIAA2022	-0.556541	0.302569	0.85669	2.58873
ENSG00000050130.13	JKAMP	-0.110935	0.658567	0.969145	5.59302
ENSG00000050327.10	ARHGEF5	0.399574	0.260634	0.824455	3.7038
ENSG00000050344.8	NFE2L3	0.135955	0.69881	0.975705	4.2441
ENSG00000050393.7	MCUR1	-0.135195	0.522345	0.943238	6.15667
ENSG00000050405.9	LIMA1	0.0160128	0.940082	0.997046	6.59012
ENSG00000050426.11	LETMD1	0.293481	0.309883	0.861543	7.08987
ENSG00000050438.12	SLC4A8	-0.334266	0.517359	0.943018	2.79341
ENSG00000050555.13	LAMC3	-0.279033	0.603585	0.960979	0.819264
ENSG00000050628.16	PTGER3	0.0315112	0.914013	0.995489	1.74109
ENSG00000050748.13	MAPK9	-0.123492	0.557851	0.952523	6.26423
ENSG00000050820.12	BCAR1	0.0158515	0.944921	0.99802	5.96135
ENSG00000051009.6	FAM160A2	-0.144184	0.492089	0.937001	5.21765
ENSG00000051108.10	HERPUD1	-0.762875	0.0108837	0.268339	7.59048
ENSG00000051128.14	HOMER3	0.19577	0.538121	0.947308	3.24671
ENSG00000051180.12	RAD51	0.200269	0.728835	0.981983	5.04369
ENSG00000051341.9	POLQ	-0.183166	0.729798	0.981983	5.18622
ENSG00000051382.4	PIK3CB	-0.0974989	0.706428	0.976868	6.13333
ENSG00000051523.6	CYBA	-0.466291	0.421405	0.912673	0.626839
ENSG00000051596.5	THOC3	-0.198238	0.495061	0.937166	3.21404
ENSG00000051620.6	HEBP2	0.0755835	0.794774	0.985106	8.46145
ENSG00000051825.10	MPHOSPH9	-0.177353	0.498691	0.939532	6.48564
ENSG00000052126.10	PLEKHA5	-0.401663	0.0764314	0.577964	5.7572
ENSG00000052344.11	PRSS8	-0.773588	0.0406262	0.449298	3.76497
ENSG00000052723.7	SIKE1	0.0202834	0.919365	0.995541	5.93837
ENSG00000052749.9	RRP12	0.278044	0.166562	0.730991	7.03139
ENSG00000052795.8	FNIP2	-0.0781492	0.736938	0.981983	4.55298
ENSG00000052802.8	MSMO1	-0.734858	0.103078	0.63426	6.93549
ENSG00000052841.10	TTC17	0.269151	0.376363	0.895149	7.03182
ENSG00000052850.5	ALX4	-0.384334	0.286896	0.844569	2.54297
ENSG00000053108.12	FSTL4	0.491811	0.209417	0.785304	2.36075
ENSG00000053254.11	FOXN3	-0.526753	0.0934178	0.612893	4.60019
ENSG00000053328.8	METTL24	0.976888	0.153691	0.716617	-0.796502
ENSG00000053371.8	AKR7A2	-0.332301	0.129878	0.680054	5.32821
ENSG00000053372.4	MRTO4	0.0236568	0.904529	0.993921	6.03589
ENSG00000053438.7	NNAT	-1.2987	0.000185497	0.0329704	0.999414
ENSG00000053501.8	USE1	-0.0943607	0.684688	0.973045	4.17872
ENSG00000053524.7	MCF2L2	-0.326669	0.634033	0.965874	-0.937762
ENSG00000053702.10	NRIP2	-0.302283	0.313097	0.863875	2.76415
ENSG00000053747.11	LAMA3	-1.8692	0.0153923	0.306875	2.54436
ENSG00000053770.7	AP5M1	0.084159	0.639284	0.966137	6.05945
ENSG00000053900.6	ANAPC4	-0.0516174	0.823681	0.988048	4.92491
ENSG00000053918.11	KCNQ1	-0.982857	0.0996656	0.62516	0.393786
ENSG00000054116.7	TRAPPC3	0.034172	0.844198	0.989329	5.76186
ENSG00000054118.9	THRAP3	-0.235048	0.14668	0.70813	8.40557
ENSG00000054148.13	PHPT1	-0.127098	0.558406	0.952523	6.46827
ENSG00000054179.7	ENTPD2	-0.535034	0.115902	0.654977	4.47858
ENSG00000054267.16	ARID4B	0.29312	0.132031	0.682796	7.42139
ENSG00000054277.8	OPN3	-0.197016	0.637663	0.966137	0.636521
ENSG00000054282.11	SDCCAG8	-0.130719	0.498175	0.939419	5.30197
ENSG00000054392.8	HHAT	-0.564527	0.236921	0.804598	2.6167
ENSG00000054523.12	KIF1B	-0.0306395	0.865541	0.990279	7.09075
ENSG00000054598.5	FOXC1	-1.02141	0.0936503	0.613537	1.14421
ENSG00000054611.9	TBC1D22A	0.0472406	0.803944	0.985122	4.73507
ENSG00000054654.11	SYNE2	-0.277039	0.457731	0.927876	6.72502
ENSG00000054690.9	PLEKHH1	-0.952102	0.0369744	0.429929	6.41304
ENSG00000054793.9	ATP9A	-0.110051	0.612825	0.961781	6.63223
ENSG00000054803.3	CBLN4	-1.55235	0.0521182	0.503095	-1.12304
ENSG00000054965.6	FAM168A	-0.25265	0.290385	0.847264	6.57116
ENSG00000054967.8	RELT	-0.409195	0.503321	0.939532	3.41447
ENSG00000054983.12	GALC	-0.0238719	0.939029	0.997046	4.04085
ENSG00000055044.6	NOP58	-0.068681	0.747675	0.981983	7.16359
ENSG00000055070.12	SZRD1	-0.070209	0.677512	0.971657	7.22529
ENSG00000055118.10	KCNH2	-0.0481935	0.867221	0.990279	5.10221
ENSG00000055130.11	CUL1	0.628355	0.027893	0.380102	6.7464
ENSG00000055147.13	FAM114A2	0.0939625	0.636466	0.966137	5.46652
ENSG00000055163.14	CYFIP2	-0.496756	0.190643	0.764182	5.78728
ENSG00000055208.13	TAB2	-0.158198	0.394879	0.902413	5.91061
ENSG00000055211.8	GINM1	-0.150164	0.425754	0.914646	5.71712
ENSG00000055332.12	EIF2AK2	-0.551701	0.00935427	0.250981	6.56538
ENSG00000055483.15	USP36	0.13748	0.547861	0.950519	6.19043
ENSG00000055609.13	KMT2C	0.381947	0.192475	0.767292	7.71528
ENSG00000055732.8	MCOLN3	-0.292639	0.65245	0.967851	-0.26649
ENSG00000055813.5	CCDC85A	0.95696	0.135394	0.689825	3.83158
ENSG00000055917.11	PUM2	-0.0131721	0.952592	0.99802	7.76047
ENSG00000055950.12	MRPL43	0.077361	0.716455	0.980117	5.74596
ENSG00000055955.11	ITIH4	0.229168	0.697453	0.975241	-0.211906
ENSG00000056050.6	C4orf27	-0.147265	0.609857	0.961781	3.52478
ENSG00000056097.11	ZFR	0.0997916	0.571754	0.956292	6.8761
ENSG00000056277.11	ZNF280C	-0.140338	0.578201	0.957342	4.0451
ENSG00000056487.11	PHF21B	1.12347	0.00962117	0.254694	5.41945
ENSG00000056558.6	TRAF1	0.29282	0.447616	0.924104	3.2753
ENSG00000056586.11	RC3H2	-0.072541	0.707711	0.977104	7.01254
ENSG00000056661.9	PCGF2	0.162578	0.484227	0.935565	5.79259
ENSG00000056736.5	IL17RB	-0.929728	0.00532749	0.193711	4.80079
ENSG00000056972.14	TRAF3IP2	0.301706	0.465948	0.928868	4.10822
ENSG00000056998.14	GYG2	-0.534173	0.438794	0.920604	0.037754
ENSG00000057019.11	DCBLD2	-0.026351	0.930679	0.996397	4.58003
ENSG00000057252.8	SOAT1	-0.428968	0.169317	0.735404	6.70882
ENSG00000057294.9	PKP2	0.0316247	0.895517	0.993024	4.6982
ENSG00000057468.6	MSH4	0.559029	0.448758	0.924469	1.16714
ENSG00000057608.12	GDI2	-0.0601231	0.772231	0.983599	7.86945
ENSG00000057657.10	PRDM1	0.541469	0.322631	0.868093	0.131584
ENSG00000057663.8	ATG5	-0.0971742	0.618982	0.962834	5.46744
ENSG00000057704.6	TMCC3	1.56639	0.00562733	0.199172	3.85926
ENSG00000057757.5	PITHD1	-0.121868	0.512581	0.941233	5.7437
ENSG00000057935.9	MTA3	0.212099	0.400199	0.904617	4.63774
ENSG00000058056.4	USP13	0.0517108	0.82562	0.988374	5.6634
ENSG00000058063.11	ATP11B	0.636404	0.0956221	0.617449	5.77453
ENSG00000058085.10	LAMC2	1.41594	0.0103741	0.263117	1.75061
ENSG00000058091.12	CDK14	1.14212	0.0128497	0.283905	6.41639
ENSG00000058262.5	SEC61A1	-0.0184704	0.917551	0.995541	8.20958
ENSG00000058272.11	PPP1R12A	0.00434784	0.981362	0.99892	6.66959
ENSG00000058335.11	RASGRF1	-1.19098	0.0963089	0.619823	0.305636
ENSG00000058404.15	CAMK2B	0.234973	0.499874	0.939532	5.31204
ENSG00000058453.12	CROCC	-0.31598	0.191167	0.765358	5.15269
ENSG00000058600.11	POLR3E	0.269964	0.151667	0.714138	6.25722
ENSG00000058668.10	ATP2B4	0.480027	0.18404	0.757325	4.63522
ENSG00000058673.11	ZC3H11A	-0.0910682	0.631838	0.965232	7.46669
ENSG00000058729.6	RIOK2	-0.169084	0.378665	0.89596	4.87507
ENSG00000058799.9	YIPF1	0.294706	0.333982	0.873334	4.73447
ENSG00000058804.10	NDC1	-0.148111	0.646484	0.966295	6.69755
ENSG00000058866.10	DGKG	-1.03477	0.0332368	0.41084	-0.0122085
ENSG00000059122.12	FLYWCH1	0.0750001	0.740447	0.981983	5.30155
ENSG00000059145.14	UNKL	0.212039	0.467652	0.92914	5.02132
ENSG00000059377.11	TBXAS1	0.746845	0.134764	0.68902	0.614998
ENSG00000059378.8	PARP12	-0.269982	0.45587	0.927804	3.47312
ENSG00000059573.4	ALDH18A1	-0.0875057	0.586818	0.958846	7.44087
ENSG00000059588.5	TARBP1	-0.280775	0.339132	0.87685	5.38787
ENSG00000059691.7	PET112	-0.285032	0.212958	0.787689	4.91188
ENSG00000059728.6	MXD1	-0.492623	0.0561278	0.515916	4.75608
ENSG00000059758.3	CDK17	-0.180481	0.446791	0.924104	5.47511
ENSG00000059769.15	DNAJC25	0.242173	0.286808	0.844569	3.95366
ENSG00000059915.12	PSD	-0.138481	0.618663	0.962834	5.70485
ENSG00000060069.12	CTDP1	-0.0738416	0.711743	0.978625	5.10079
ENSG00000060138.8	YBX3	-0.188768	0.509675	0.941233	8.67541
ENSG00000060140.4	STYK1	0.170157	0.527892	0.943823	5.10557
ENSG00000060237.12	WNK1	0.00441519	0.980449	0.99892	8.35884
ENSG00000060339.9	CCAR1	0.00439176	0.981144	0.99892	7.39152
ENSG00000060491.12	OGFR	-0.369708	0.0885471	0.602253	5.62206
ENSG00000060558.3	GNA15	-0.593802	0.386372	0.899133	-0.863306
ENSG00000060642.6	PIGV	-0.062245	0.758186	0.982554	4.8161
ENSG00000060656.15	PTPRU	-0.283911	0.259298	0.823338	5.60926
ENSG00000060688.8	SNRNP40	-0.0501686	0.811269	0.985702	5.88276
ENSG00000060749.10	QSER1	0.28072	0.345384	0.882483	6.07189
ENSG00000060762.14	MPC1	-0.0955719	0.728799	0.981983	4.06374
ENSG00000060971.13	ACAA1	0.322961	0.203023	0.779939	5.34887
ENSG00000060982.10	BCAT1	0.601368	0.370904	0.892071	3.63572
ENSG00000061273.13	HDAC7	0.0346437	0.896408	0.993024	6.06533
ENSG00000061455.10	PRDM6	-0.363475	0.469586	0.929764	2.37762
ENSG00000061656.5	SPAG4	0.845245	0.116221	0.654977	1.49376
ENSG00000061676.10	NCKAP1	0.0520949	0.807966	0.985616	8.27879
ENSG00000061794.8	MRPS35	-0.299109	0.149501	0.710981	7.42707
ENSG00000061918.8	GUCY1B3	-0.217407	0.546308	0.949947	4.08565
ENSG00000061936.5	SFSWAP	-0.0193887	0.915866	0.995541	6.52285
ENSG00000061938.12	TNK2	-0.149383	0.703761	0.976313	5.29163
ENSG00000061987.10	MON2	-0.398802	0.076707	0.578695	6.96013
ENSG00000062038.9	CDH3	-0.137771	0.597561	0.960541	6.18808
ENSG00000062194.11	GPBP1	-0.0547157	0.746408	0.981983	6.88698
ENSG00000062282.10	DGAT2	-1.58258	0.000106504	0.0244371	4.11539
ENSG00000062370.12	ZNF112	-0.0253856	0.920017	0.995541	3.12825
ENSG00000062485.14	CS	-0.00587298	0.979669	0.99892	8.81901
ENSG00000062524.11	LTK	0.258192	0.678345	0.972165	-0.508474
ENSG00000062582.9	MRPS24	-0.154656	0.773056	0.983599	-0.398444
ENSG00000062598.13	ELMO2	0.0750638	0.710803	0.978285	5.65179
ENSG00000062650.13	WAPAL	0.0712996	0.702041	0.976313	6.83588
ENSG00000062716.6	VMP1	0.336926	0.269325	0.831723	6.06374
ENSG00000062725.5	APPBP2	0.251963	0.198151	0.773588	5.74387
ENSG00000062822.8	POLD1	-0.157957	0.608604	0.961781	6.30784
ENSG00000063015.15	SEZ6	-0.12837	0.80592	0.985122	5.85431
ENSG00000063046.13	EIF4B	-0.151397	0.609903	0.961781	8.75247
ENSG00000063127.11	SLC6A16	0.363849	0.349582	0.884006	2.37907
ENSG00000063169.6	GLTSCR1	-0.113924	0.652645	0.967851	4.77801
ENSG00000063176.11	SPHK2	-0.252179	0.2512	0.816266	4.53883
ENSG00000063177.8	RPL18	-0.0283553	0.901769	0.993628	9.35711
ENSG00000063180.4	CA11	-0.0802221	0.776142	0.983599	5.18312
ENSG00000063241.3	ISOC2	-0.207891	0.526161	0.943594	6.57788
ENSG00000063244.8	U2AF2	0.0368592	0.836296	0.988374	8.16323
ENSG00000063245.10	EPN1	-0.127789	0.494712	0.937001	6.94911
ENSG00000063322.9	MED29	0.0474294	0.776877	0.983599	6.16707
ENSG00000063438.12	AHRR	1.10024	0.0116892	0.274025	2.28876
ENSG00000063587.12	ZNF275	-0.347009	0.0851851	0.593117	5.29713
ENSG00000063601.12	MTMR1	0.0797222	0.680022	0.972569	6.0418
ENSG00000063660.4	GPC1	-0.161577	0.604653	0.960994	4.38638
ENSG00000063761.11	ADCK1	0.0621781	0.818668	0.986687	3.47135
ENSG00000063854.8	HAGH	-0.0469123	0.794766	0.985106	5.82328
ENSG00000063978.11	RNF4	-0.0157171	0.929073	0.996397	6.35277
ENSG00000064012.17	CASP8	-1.0292	0.0238236	0.361373	3.45236
ENSG00000064042.13	LIMCH1	0.657045	0.0373893	0.432362	7.80076
ENSG00000064102.10	ASUN	0.162044	0.479408	0.933165	5.97982
ENSG00000064115.6	TM7SF3	0.0166071	0.924581	0.99614	7.01867
ENSG00000064195.7	DLX3	1.55314	0.0909801	0.606392	2.72296
ENSG00000064199.2	SPA17	0.442311	0.152164	0.714262	4.02791
ENSG00000064201.11	TSPAN32	1.12269	0.0944961	0.614972	0.254775
ENSG00000064205.6	WISP2	0.647806	0.352321	0.885605	-0.56857
ENSG00000064225.8	ST3GAL6	-0.282334	0.516942	0.942823	0.717722
ENSG00000064270.8	ATP2C2	0.437066	0.408411	0.906863	1.05251
ENSG00000064300.4	NGFR	-0.145436	0.780989	0.983599	-0.379877
ENSG00000064309.10	CDON	-0.993351	0.020237	0.340335	2.82586
ENSG00000064313.7	TAF2	0.0432731	0.829938	0.988374	5.94371
ENSG00000064393.11	HIPK2	0.785787	0.00821619	0.241114	8.20212
ENSG00000064419.9	TNPO3	0.519083	0.0277916	0.380102	6.86736
ENSG00000064490.9	RFXANK	-0.0270445	0.891159	0.992736	4.5606
ENSG00000064545.10	TMEM161A	-0.171943	0.353538	0.885605	5.11866
ENSG00000064547.9	LPAR2	0.577686	0.23212	0.803475	2.91209
ENSG00000064601.12	CTSA	0.24286	0.384308	0.898026	5.9006
ENSG00000064607.12	SUGP2	-0.0101553	0.962576	0.998071	6.61228
ENSG00000064651.9	SLC12A2	0.932237	0.149713	0.710981	7.64029
ENSG00000064652.6	SNX24	-0.0936177	0.725483	0.981983	3.09022
ENSG00000064666.10	CNN2	-1.76362	3.50862e-05	0.0132505	4.42745
ENSG00000064687.8	ABCA7	-0.353019	0.143432	0.705566	6.3168
ENSG00000064692.14	SNCAIP	0.00371359	0.992847	0.999585	0.800229
ENSG00000064703.7	DDX20	-0.0796408	0.697222	0.975205	5.40589
ENSG00000064726.5	BTBD1	0.0486869	0.809385	0.985702	7.02171
ENSG00000064763.6	FAR2	0.284982	0.282963	0.841562	6.42513
ENSG00000064787.8	BCAS1	-0.319984	0.662438	0.970407	3.09105
ENSG00000064932.11	SBNO2	-0.0227082	0.915649	0.995541	7.07032
ENSG00000064933.12	PMS1	-0.0711577	0.734253	0.981983	5.57218
ENSG00000064961.14	HMG20B	-0.0096686	0.969972	0.998451	8.29627
ENSG00000064989.8	CALCRL	0.780903	0.186676	0.759661	0.794882
ENSG00000064995.12	TAF11	-0.0674214	0.747103	0.981983	5.28682
ENSG00000064999.12	ANKS1A	0.331431	0.12351	0.668887	5.98038
ENSG00000065000.11	AP3D1	0.0158236	0.935957	0.996397	8.18858
ENSG00000065029.10	ZNF76	-0.217177	0.266759	0.829954	6.26978
ENSG00000065054.9	SLC9A3R2	-0.105335	0.713818	0.979531	6.22553
ENSG00000065057.3	NTHL1	-0.114393	0.61885	0.962834	4.38748
ENSG00000065060.12	UHRF1BP1	-0.0500869	0.869823	0.990365	6.54288
ENSG00000065135.7	GNAI3	0.112987	0.651023	0.967231	6.76634
ENSG00000065150.14	IPO5	-0.111381	0.581177	0.957342	8.34133
ENSG00000065154.7	OAT	0.289791	0.301559	0.855316	6.12331
ENSG00000065183.11	WDR3	0.115227	0.586131	0.958846	6.5832
ENSG00000065243.14	PKN2	0.10209	0.555358	0.951903	6.77466
ENSG00000065268.6	WDR18	-0.23519	0.299688	0.854667	5.60204
ENSG00000065308.4	TRAM2	-0.80934	0.00866363	0.24368	4.61196
ENSG00000065320.4	NTN1	0.420306	0.375845	0.895149	0.785943
ENSG00000065328.12	MCM10	-0.165225	0.770388	0.983599	5.80068
ENSG00000065357.15	DGKA	-0.0304742	0.915569	0.995541	4.90069
ENSG00000065361.10	ERBB3	0.213432	0.492471	0.937001	8.20168
ENSG00000065413.12	ANKRD44	-0.280192	0.355589	0.886254	2.58038
ENSG00000065427.10	KARS	0.291313	0.210118	0.786281	7.39692
ENSG00000065457.6	ADAT1	-0.100023	0.677684	0.971834	5.52476
ENSG00000065485.13	PDIA5	-0.19798	0.397924	0.903467	4.91871
ENSG00000065491.8	TBC1D22B	-0.121881	0.59853	0.960541	4.20026
ENSG00000065518.7	NDUFB4	0.146226	0.639535	0.966137	6.75462
ENSG00000065526.6	SPEN	0.19661	0.40483	0.906047	7.8902
ENSG00000065534.14	MYLK	0.258215	0.552236	0.951856	3.20571
ENSG00000065548.13	ZC3H15	-0.0722845	0.696593	0.975173	6.6159
ENSG00000065559.10	MAP2K4	0.100893	0.668685	0.970407	5.44489
ENSG00000065600.8	TMEM206	-0.110624	0.603783	0.960979	3.86911
ENSG00000065609.10	SNAP91	-0.018621	0.943787	0.99802	5.49781
ENSG00000065613.9	SLK	0.0394048	0.82187	0.987609	7.27722
ENSG00000065615.9	CYB5R4	0.274574	0.214042	0.7877	3.54418
ENSG00000065618.12	COL17A1	1.53625	0.0396947	0.443617	-0.684353
ENSG00000065621.10	GSTO2	-0.148683	0.600484	0.960541	6.26013
ENSG00000065665.16	SEC61A2	0.195119	0.363594	0.888531	3.78103
ENSG00000065717.10	TLE2	-0.399978	0.137646	0.695089	4.81554
ENSG00000065802.7	ASB1	0.127048	0.522452	0.943238	5.25392
ENSG00000065809.9	FAM107B	-0.193265	0.532913	0.945387	5.12711
ENSG00000065833.7	ME1	1.82008	0.00663061	0.216587	3.79352
ENSG00000065882.11	TBC1D1	-0.402095	0.0817771	0.587064	5.6254
ENSG00000065883.10	CDK13	0.198589	0.396519	0.902807	6.76411
ENSG00000065911.7	MTHFD2	-0.345346	0.413128	0.908163	7.81689
ENSG00000065923.5	SLC9A7	-0.185696	0.595248	0.959791	3.63764
ENSG00000065970.4	FOXJ2	-0.411961	0.0666825	0.552036	6.13856
ENSG00000065978.13	YBX1	0.36071	0.200015	0.775934	8.10636
ENSG00000065989.11	PDE4A	-0.137476	0.59868	0.960541	4.41888
ENSG00000066027.7	PPP2R5A	0.229138	0.298754	0.854635	5.77968
ENSG00000066032.14	CTNNA2	-1.50938	0.0311138	0.39889	4.33683
ENSG00000066044.9	ELAVL1	0.108404	0.576708	0.95722	7.23302
ENSG00000066084.8	DIP2B	0.0690085	0.691161	0.974898	7.1816
ENSG00000066117.10	SMARCD1	-0.114235	0.518869	0.943238	7.02871
ENSG00000066135.8	KDM4A	0.0916338	0.664651	0.970407	6.00133
ENSG00000066136.15	NFYC	-0.213091	0.312359	0.863258	5.61565
ENSG00000066185.8	ZMYND12	0.208804	0.631616	0.965232	0.627892
ENSG00000066230.6	SLC9A3	-0.191121	0.793665	0.985106	0.958779
ENSG00000066248.10	NGEF	-0.712896	0.0409896	0.451949	2.71855
ENSG00000066279.12	ASPM	-0.242439	0.671855	0.970407	7.14923
ENSG00000066322.8	ELOVL1	0.0540939	0.834123	0.988374	6.82831
ENSG00000066336.7	SPI1	0.257533	0.665021	0.970407	0.0582336
ENSG00000066379.10	ZNRD1	0.343456	0.144074	0.706054	3.30055
ENSG00000066382.12	MPPED2	0.193	0.602034	0.960612	1.02616
ENSG00000066422.4	ZBTB11	0.225774	0.236293	0.804335	6.2892
ENSG00000066427.17	ATXN3	-0.213443	0.405647	0.906047	4.95672
ENSG00000066455.8	GOLGA5	-0.108695	0.555198	0.951903	5.89693
ENSG00000066557.5	LRRC40	-0.00779799	0.974584	0.99892	5.6696
ENSG00000066583.7	ISOC1	-0.412557	0.0901442	0.604942	5.56392
ENSG00000066629.12	EML1	0.172822	0.665618	0.970407	4.13948
ENSG00000066651.13	TRMT11	-0.333616	0.195191	0.770651	4.16571
ENSG00000066654.8	THUMPD1	-0.0953618	0.583497	0.958269	6.47561
ENSG00000066697.10	MSANTD3	-0.241056	0.309817	0.861543	3.77058
ENSG00000066735.10	KIF26A	-2.77818	0.000166302	0.0310254	0.846348
ENSG00000066739.7	ATG2B	0.0331423	0.90305	0.993667	6.25496
ENSG00000066777.4	ARFGEF1	0.120798	0.507267	0.939818	6.81802
ENSG00000066827.11	ZFAT	0.258347	0.233896	0.803948	3.9473
ENSG00000066855.11	MTFR1	-0.34305	0.110935	0.65	5.67237
ENSG00000066923.13	STAG3	0.641335	0.0467134	0.479687	3.3698
ENSG00000066926.6	FECH	-0.46521	0.0908524	0.605945	7.32366
ENSG00000066933.11	MYO9A	-0.246396	0.239514	0.807119	6.57182
ENSG00000067048.12	DDX3Y	-0.400276	0.084953	0.592741	6.65381
ENSG00000067057.12	PFKP	0.598189	0.352731	0.885605	3.60989
ENSG00000067064.6	IDI1	-0.949635	0.0120548	0.274358	7.00545
ENSG00000067066.12	SP100	-3.58883	4.96623e-05	0.0152872	1.22288
ENSG00000067082.10	KLF6	-1.87016	1.69068e-05	0.0088814	6.28964
ENSG00000067113.12	PPAP2A	1.06696	0.0389888	0.440833	6.37226
ENSG00000067141.12	NEO1	0.105927	0.61781	0.962834	5.93437
ENSG00000067167.3	TRAM1	-0.333159	0.109986	0.649183	6.48813
ENSG00000067177.10	PHKA1	-0.120905	0.503292	0.939532	5.61458
ENSG00000067182.3	TNFRSF1A	0.104144	0.585224	0.958739	6.23527
ENSG00000067191.11	CACNB1	-0.35681	0.189327	0.763942	2.84626
ENSG00000067208.10	EVI5	0.0521639	0.818274	0.986557	4.3943
ENSG00000067221.9	STOML1	0.100113	0.721452	0.981302	3.44544
ENSG00000067225.13	PKM	0.157378	0.509394	0.941233	9.331
ENSG00000067248.5	DHX29	0.0810098	0.732374	0.981983	5.86794
ENSG00000067334.9	DNTTIP2	-0.208527	0.324275	0.868944	6.53127
ENSG00000067365.10	METTL22	-0.148462	0.505556	0.939532	3.81159
ENSG00000067369.9	TP53BP1	0.211511	0.281771	0.840748	6.75066
ENSG00000067445.16	TRO	-0.624557	0.253099	0.817138	-0.335392
ENSG00000067533.5	RRP15	0.0579453	0.76235	0.982826	6.81066
ENSG00000067560.6	RHOA	-0.14028	0.487353	0.936296	8.90163
ENSG00000067596.6	DHX8	-0.0349722	0.848904	0.989514	6.50794
ENSG00000067601.6	PMS2P4	-0.115786	0.737954	0.981983	1.34059
ENSG00000067606.11	PRKCZ	0.237842	0.375588	0.895008	4.24829
ENSG00000067646.7	ZFY	-0.108086	0.670258	0.970407	4.69882
ENSG00000067704.8	IARS2	-0.169611	0.447257	0.924104	8.25078
ENSG00000067715.9	SYT1	1.37473	0.0016632	0.110352	1.50155
ENSG00000067798.9	NAV3	0.576971	0.263852	0.827237	0.221947
ENSG00000067829.14	IDH3G	-0.167412	0.357809	0.886914	6.01659
ENSG00000067836.8	ROGDI	0.412296	0.210677	0.786671	5.26353
ENSG00000067840.8	PDZD4	0.412186	0.343029	0.879921	4.91623
ENSG00000067842.13	ATP2B3	-1.18412	0.173365	0.740291	0.779907
ENSG00000067900.6	ROCK1	-0.111799	0.499904	0.939532	6.80363
ENSG00000067955.9	CBFB	0.0431751	0.850102	0.989514	5.97351
ENSG00000067992.8	PDK3	-0.70662	0.0293098	0.388501	3.07302
ENSG00000068001.9	HYAL2	-0.187109	0.424702	0.914357	5.14449
ENSG00000068024.12	HDAC4	0.303415	0.393146	0.901814	3.53616
ENSG00000068028.13	RASSF1	0.146497	0.560277	0.953311	4.68831
ENSG00000068078.13	FGFR3	0.130818	0.694226	0.974926	6.49646
ENSG00000068079.3	IFI35	-0.0187218	0.947563	0.99802	2.28454
ENSG00000068097.10	HEATR6	0.114411	0.561036	0.95379	4.75554
ENSG00000068120.10	COASY	0.01128	0.958428	0.99802	6.92772
ENSG00000068137.10	PLEKHH3	-0.263038	0.273615	0.834544	6.32879
ENSG00000068305.13	MEF2A	0.00391371	0.98787	0.999469	5.69377
ENSG00000068308.9	OTUD5	0.0260275	0.892558	0.992788	6.03644
ENSG00000068323.12	TFE3	-0.280957	0.155378	0.718682	5.0287
ENSG00000068354.11	TBC1D25	0.144168	0.511029	0.941233	3.93437
ENSG00000068366.15	ACSL4	-1.858	1.34359e-05	0.0083815	3.60603
ENSG00000068383.14	INPP5A	0.214154	0.745825	0.981983	5.22455
ENSG00000068394.9	GPKOW	-0.134467	0.527766	0.943766	5.13176
ENSG00000068400.9	GRIPAP1	-0.0243312	0.909337	0.994957	6.56798
ENSG00000068438.10	FTSJ1	-0.136529	0.565072	0.955078	5.60928
ENSG00000068489.8	PRR11	-0.458448	0.445479	0.923344	4.24135
ENSG00000068615.12	REEP1	-0.271733	0.607983	0.961781	2.75933
ENSG00000068650.14	ATP11A	0.274748	0.642289	0.966237	0.0445403
ENSG00000068654.11	POLR1A	0.0879085	0.624384	0.963584	7.22273
ENSG00000068697.6	LAPTM4A	-0.00756799	0.970322	0.998451	6.65991
ENSG00000068724.11	TTC7A	0.0307759	0.91431	0.995541	3.10429
ENSG00000068745.10	IP6K2	0.110369	0.569501	0.955709	6.66722
ENSG00000068784.8	SRBD1	-0.0843146	0.731512	0.981983	3.94711
ENSG00000068793.13	CYFIP1	0.545502	0.0192469	0.335602	7.68869
ENSG00000068796.12	KIF2A	0.0109523	0.965652	0.998198	5.88056
ENSG00000068831.14	RASGRP2	0.262453	0.605602	0.961277	1.31844
ENSG00000068878.10	PSME4	-0.0263528	0.914518	0.995541	7.06727
ENSG00000068885.10	IFT80	-0.378213	0.234879	0.803948	4.32561
ENSG00000068903.15	SIRT2	0.120561	0.543679	0.948839	5.6679
ENSG00000068912.9	ERLEC1	-0.158777	0.447368	0.924104	5.46996
ENSG00000068971.9	PPP2R5B	0.14683	0.6505	0.967103	4.60194
ENSG00000068976.9	PYGM	-0.0637388	0.895121	0.993024	0.228718
ENSG00000069011.11	PITX1	-0.200862	0.468993	0.929764	4.21274
ENSG00000069020.14	MAST4	0.151546	0.572629	0.95636	4.47708
ENSG00000069122.14	GPR116	0.931703	0.351543	0.885605	0.962736
ENSG00000069188.12	SDK2	-0.0763458	0.909144	0.994957	-0.682628
ENSG00000069248.9	NUP133	0.0942303	0.588588	0.958962	7.26759
ENSG00000069275.12	NUCKS1	-0.3078	0.111473	0.650458	9.79386
ENSG00000069329.11	VPS35	0.00662104	0.972445	0.998813	7.61463
ENSG00000069345.7	DNAJA2	0.0383198	0.839368	0.988478	6.85689
ENSG00000069399.8	BCL3	0.96222	0.0373507	0.432362	4.20125
ENSG00000069424.10	KCNAB2	0.129107	0.665173	0.970407	3.95184
ENSG00000069431.6	ABCC9	0.219733	0.770905	0.983599	-0.24872
ENSG00000069482.6	GAL	0.980205	0.0380769	0.436082	4.2541
ENSG00000069493.10	CLEC2D	0.540556	0.181868	0.75382	1.2788
ENSG00000069509.5	FUNDC1	-0.0351126	0.884805	0.991663	4.01389
ENSG00000069667.11	RORA	-0.952393	0.0435156	0.46423	1.38456
ENSG00000069696.6	DRD4	0.597907	0.12114	0.663794	2.35698
ENSG00000069702.6	TGFBR3	-0.232651	0.528233	0.943925	2.02808
ENSG00000069712.9	KIAA1107	-0.215001	0.354791	0.886254	3.51913
ENSG00000069764.5	PLA2G10	0.754587	0.197333	0.773459	-0.716358
ENSG00000069812.7	HES2	-0.907966	0.147723	0.710205	1.14253
ENSG00000069849.6	ATP1B3	-0.211695	0.425626	0.914646	5.51103
ENSG00000069869.11	NEDD4	0.238252	0.503636	0.939532	4.58033
ENSG00000069943.5	PIGB	0.110039	0.612904	0.961781	3.90376
ENSG00000069956.7	MAPK6	0.0660272	0.812471	0.986041	6.53058
ENSG00000069966.14	GNB5	-0.373238	0.170794	0.737225	2.91812
ENSG00000069974.11	RAB27A	-0.779793	0.0348486	0.418634	3.9657
ENSG00000069998.8	CECR5	0.0634554	0.777454	0.983599	5.82631
ENSG00000070010.14	UFD1L	-0.0957278	0.684367	0.973045	6.20376
ENSG00000070018.4	LRP6	0.1547	0.545661	0.949732	6.29797
ENSG00000070019.3	GUCY2C	0.919539	0.160845	0.724701	0.239953
ENSG00000070031.3	SCT	0.944919	0.0652775	0.547387	0.0961313
ENSG00000070047.7	PHRF1	-0.23941	0.248057	0.815696	6.71627
ENSG00000070061.10	IKBKAP	0.0820598	0.654699	0.968074	6.62049
ENSG00000070081.11	NUCB2	-0.21057	0.405026	0.906047	6.91569
ENSG00000070087.9	PFN2	0.0386761	0.84824	0.989514	6.80109
ENSG00000070159.9	PTPN3	-0.198843	0.256794	0.821364	6.14941
ENSG00000070182.13	SPTB	-0.0180261	0.956982	0.99802	3.86825
ENSG00000070190.8	DAPP1	0.765728	0.200687	0.776686	-0.661484
ENSG00000070214.11	SLC44A1	-0.0642421	0.792845	0.985106	6.51903
ENSG00000070269.9	TMEM260	0.12828	0.657179	0.968854	5.15724
ENSG00000070366.9	SMG6	0.0711991	0.698868	0.975713	5.69611
ENSG00000070367.11	EXOC5	-0.120187	0.547502	0.950388	6.47479
ENSG00000070371.11	CLTCL1	0.313695	0.322937	0.868093	4.4658
ENSG00000070388.7	FGF22	-0.390349	0.323728	0.868905	1.57382
ENSG00000070404.5	FSTL3	0.0711681	0.83261	0.988374	3.99315
ENSG00000070413.14	DGCR2	-0.135485	0.452606	0.925583	6.33021
ENSG00000070423.13	RNF126	-0.167179	0.390464	0.900765	6.0437
ENSG00000070444.10	MNT	-0.473761	0.0737695	0.571461	5.62441
ENSG00000070476.10	ZXDC	-0.244826	0.260027	0.824308	5.49684
ENSG00000070495.10	JMJD6	-0.267353	0.226202	0.798488	5.11621
ENSG00000070501.7	POLB	-0.011657	0.952219	0.99802	4.84365
ENSG00000070526.10	ST6GALNAC1	-0.963971	0.170277	0.736413	-0.838839
ENSG00000070540.8	WIPI1	0.28568	0.429637	0.914694	3.23338
ENSG00000070601.5	FRMPD1	1.61	0.00479675	0.185928	1.9351
ENSG00000070610.10	GBA2	0.361711	0.0978764	0.62234	7.01896
ENSG00000070614.10	NDST1	0.194756	0.355848	0.886254	7.10021
ENSG00000070669.12	ASNS	0.268382	0.528853	0.944357	7.78439
ENSG00000070718.7	AP3M2	0.476283	0.0530245	0.505501	5.36632
ENSG00000070731.5	ST6GALNAC2	-0.00258634	0.995015	0.999585	1.99564
ENSG00000070756.9	PABPC1	0.0755844	0.784704	0.984074	10.1755
ENSG00000070759.12	TESK2	-1.15429	1.5245e-05	0.00861295	3.18442
ENSG00000070761.3	C16orf80	0.0151798	0.950843	0.99802	5.11553
ENSG00000070770.4	CSNK2A2	-0.0298982	0.873065	0.990685	6.54602
ENSG00000070778.8	PTPN21	-0.699141	0.194588	0.769488	4.17327
ENSG00000070785.12	EIF2B3	0.0431366	0.868374	0.990279	4.57332
ENSG00000070814.13	TCOF1	0.017905	0.946133	0.99802	7.37273
ENSG00000070831.11	CDC42	0.00304312	0.986725	0.999434	7.1852
ENSG00000070882.8	OSBPL3	-0.0505727	0.885496	0.991663	5.44185
ENSG00000070886.6	EPHA8	0.765451	0.185141	0.758889	0.408619
ENSG00000070950.5	RAD18	-0.383323	0.197248	0.773459	5.58845
ENSG00000070961.10	ATP2B1	0.35351	0.192367	0.767292	7.20802
ENSG00000071051.9	NCK2	-0.338286	0.172228	0.739288	3.85702
ENSG00000071054.11	MAP4K4	-0.151872	0.583288	0.958084	6.9395
ENSG00000071073.8	MGAT4A	0.429376	0.264678	0.828655	4.01835
ENSG00000071082.6	RPL31	0.218383	0.407316	0.906244	8.3063
ENSG00000071127.12	WDR1	0.0151116	0.948246	0.99802	7.81174
ENSG00000071189.17	SNX13	0.410013	0.0453984	0.473319	6.55963
ENSG00000071205.7	ARHGAP10	0.6391	0.084869	0.592681	2.74898
ENSG00000071242.7	RPS6KA2	0.184351	0.77757	0.983599	1.76028
ENSG00000071243.11	ING3	0.0810168	0.769434	0.983599	5.06587
ENSG00000071246.6	VASH1	-1.21092	0.0120271	0.274358	2.30344
ENSG00000071462.7	WBSCR22	0.438885	0.0277055	0.379847	6.94933
ENSG00000071537.9	SEL1L	-0.11697	0.639623	0.966137	7.77861
ENSG00000071539.9	TRIP13	-0.122963	0.797574	0.985106	5.72035
ENSG00000071553.12	ATP6AP1	0.152347	0.525752	0.943594	7.48613
ENSG00000071564.10	TCF3	0.0216413	0.919783	0.995541	7.01854
ENSG00000071575.7	TRIB2	-0.97766	0.181256	0.753171	-0.600089
ENSG00000071626.12	DAZAP1	0.0945896	0.617944	0.962834	8.1817
ENSG00000071655.13	MBD3	-0.139439	0.487973	0.936401	6.65225
ENSG00000071794.11	HLTF	-0.132205	0.543828	0.948839	7.69084
ENSG00000071859.10	FAM50A	-0.164182	0.441572	0.921265	6.09537
ENSG00000071889.12	FAM3A	-0.132556	0.514867	0.941776	5.40618
ENSG00000071894.10	CPSF1	0.0907499	0.618834	0.962834	7.21136
ENSG00000071994.6	PDCD2	0.25279	0.214099	0.7877	6.43551
ENSG00000072041.12	SLC6A15	-0.0853957	0.810123	0.985702	4.98329
ENSG00000072042.8	RDH11	-0.69923	0.0564601	0.516682	8.40446
ENSG00000072062.9	PRKACA	0.0562968	0.823176	0.988024	6.92796
ENSG00000072071.12	LPHN1	0.0201918	0.921465	0.995541	6.95591
ENSG00000072110.9	ACTN1	0.129124	0.547422	0.950388	7.19292
ENSG00000072121.11	ZFYVE26	0.131011	0.629348	0.964342	5.31953
ENSG00000072133.6	RPS6KA6	0.282763	0.2997	0.854667	4.70055
ENSG00000072134.11	EPN2	0.331555	0.158972	0.72254	5.59072
ENSG00000072135.8	PTPN18	0.167911	0.411797	0.907682	7.63428
ENSG00000072195.10	SPEG	0.286125	0.601214	0.960541	1.37715
ENSG00000072201.9	LNX1	-0.0896777	0.79651	0.985106	2.76264
ENSG00000072210.14	ALDH3A2	-0.0642366	0.791299	0.984973	10.7522
ENSG00000072274.8	TFRC	-0.263762	0.487349	0.936296	8.34214
ENSG00000072310.12	SREBF1	-0.912863	0.0626642	0.539016	7.8713
ENSG00000072364.8	AFF4	-0.0399497	0.862548	0.990233	7.70375
ENSG00000072401.10	UBE2D1	-0.155628	0.45291	0.925761	4.59356
ENSG00000072415.4	MPP5	-0.0315613	0.849858	0.989514	5.83127
ENSG00000072422.12	RHOBTB1	-0.363047	0.396846	0.902807	3.54301
ENSG00000072501.13	SMC1A	-0.111692	0.689654	0.974859	8.60965
ENSG00000072506.8	HSD17B10	0.226486	0.395212	0.902413	6.47395
ENSG00000072518.16	MARK2	0.00836821	0.961279	0.99802	7.00455
ENSG00000072571.15	HMMR	-0.417939	0.500188	0.939532	6.30344
ENSG00000072609.13	CHFR	-0.133038	0.477997	0.932451	5.90273
ENSG00000072657.4	TRHDE	-0.941057	0.0405274	0.44895	3.03104
ENSG00000072682.14	P4HA2	-0.0529256	0.901956	0.993628	3.04623
ENSG00000072736.14	NFATC3	0.0243227	0.908768	0.994957	5.12398
ENSG00000072756.12	TRNT1	0.257871	0.190233	0.763942	5.19828
ENSG00000072778.15	ACADVL	-0.0712796	0.739862	0.981983	8.8551
ENSG00000072786.8	STK10	0.324885	0.177495	0.747343	4.52502
ENSG00000072803.13	FBXW11	0.0203208	0.911603	0.995277	6.28335
ENSG00000072818.7	ACAP1	0.0357165	0.941979	0.997046	2.43891
ENSG00000072832.10	CRMP1	-0.0442295	0.907703	0.994815	3.28523
ENSG00000072840.8	EVC	-0.0769327	0.842135	0.989329	5.14972
ENSG00000072849.6	DERL2	-0.264416	0.254354	0.817671	5.51021
ENSG00000072858.6	SIDT1	1.18576	0.00928861	0.249891	0.712862
ENSG00000072864.8	NDE1	-0.330367	0.334517	0.873417	4.77166
ENSG00000072954.2	TMEM38A	1.07605	0.0129257	0.284167	1.6993
ENSG00000072958.4	AP1M1	0.0342577	0.896618	0.993024	5.38247
ENSG00000073008.10	PVR	-0.0221029	0.906831	0.994412	6.64965
ENSG00000073009.8	IKBKG	0.470272	0.298396	0.854404	0.983508
ENSG00000073050.7	XRCC1	-0.168418	0.443394	0.921887	5.0937
ENSG00000073060.11	SCARB1	-0.337772	0.10296	0.63426	7.85358
ENSG00000073067.9	CYP2W1	0.561429	0.43383	0.916899	0.305503
ENSG00000073111.9	MCM2	-0.337042	0.439422	0.920947	7.58001
ENSG00000073146.11	MOV10L1	-0.405359	0.286322	0.844071	3.14586
ENSG00000073150.9	PANX2	0.0701189	0.853392	0.989514	4.10719
ENSG00000073169.9	SELO	-0.0996697	0.620029	0.962834	5.69743
ENSG00000073331.13	ALPK1	-0.0130295	0.966395	0.998198	4.61698
ENSG00000073350.9	LLGL2	0.125625	0.528295	0.943952	7.28703
ENSG00000073417.10	PDE8A	-0.113789	0.602148	0.960612	5.63851
ENSG00000073464.7	CLCN4	-0.142738	0.613703	0.962276	3.33133
ENSG00000073536.13	NLE1	-0.391386	0.0726245	0.569711	5.21847
ENSG00000073578.12	SDHA	-0.0151467	0.942101	0.997046	6.86443
ENSG00000073584.14	SMARCE1	-0.116537	0.545388	0.949623	6.28551
ENSG00000073605.14	GSDMB	0.309153	0.389803	0.900765	4.39704
ENSG00000073614.7	KDM5A	-0.118353	0.505605	0.939532	7.17095
ENSG00000073670.9	ADAM11	0.528879	0.147189	0.70885	3.49982
ENSG00000073711.6	PPP2R3A	-0.545354	0.0322932	0.405943	3.48232
ENSG00000073712.9	FERMT2	-0.0683844	0.754751	0.982365	5.51658
ENSG00000073756.7	PTGS2	-1.47074	0.00552477	0.197369	0.744506
ENSG00000073792.11	IGF2BP2	1.31656	0.00399771	0.169815	3.97765
ENSG00000073803.9	MAP3K13	0.0146876	0.942007	0.997046	5.37656
ENSG00000073849.10	ST6GAL1	0.740699	0.0761168	0.577964	5.33387
ENSG00000073910.15	FRY	0.198234	0.679738	0.972569	5.65105
ENSG00000073921.13	PICALM	-0.00525946	0.974272	0.99892	7.42278
ENSG00000073969.14	NSF	0.123581	0.6145	0.962616	5.91809
ENSG00000074047.16	GLI2	1.28531	0.112223	0.651532	-0.826774
ENSG00000074054.13	CLASP1	0.0551904	0.769989	0.983599	5.86392
ENSG00000074071.9	MRPS34	0.1587	0.465335	0.928868	7.16982
ENSG00000074181.4	NOTCH3	0.539826	0.205695	0.781804	6.13919
ENSG00000074201.4	CLNS1A	0.0229997	0.904067	0.993831	6.93701
ENSG00000074211.9	PPP2R2C	-1.15248	0.0546547	0.509898	3.40596
ENSG00000074219.9	TEAD2	-0.0623758	0.876173	0.991387	5.89222
ENSG00000074266.13	EED	-0.124241	0.662387	0.970407	4.80188
ENSG00000074276.6	CDHR2	0.689489	0.134361	0.687946	2.33068
ENSG00000074317.6	SNCB	-0.305255	0.575137	0.956874	0.749343
ENSG00000074319.8	TSG101	0.0290892	0.871852	0.99042	6.34488
ENSG00000074356.12	C17orf85	0.0789208	0.691246	0.974898	6.05524
ENSG00000074370.13	ATP2A3	-0.50066	0.337225	0.874813	0.900509
ENSG00000074410.9	CA12	0.7163	0.268231	0.830802	4.17974
ENSG00000074416.9	MGLL	0.192497	0.612383	0.961781	2.95423
ENSG00000074527.7	NTN4	-0.28073	0.659223	0.969314	0.17282
ENSG00000074582.8	BCS1L	0.171327	0.435125	0.917499	5.28065
ENSG00000074590.9	NUAK1	-0.90842	0.017457	0.322747	3.42513
ENSG00000074603.14	DPP8	-0.126232	0.526215	0.943594	5.99166
ENSG00000074621.9	SLC24A1	-0.299842	0.271689	0.834188	3.45212
ENSG00000074657.9	ZNF532	0.180877	0.686541	0.973693	4.03807
ENSG00000074660.11	SCARF1	0.660824	0.115625	0.654735	2.1351
ENSG00000074695.5	LMAN1	-0.242018	0.221294	0.794303	6.72061
ENSG00000074696.8	PTPLAD1	0.0127472	0.946151	0.99802	7.94555
ENSG00000074706.9	IPCEF1	1.48039	0.0133928	0.287719	-0.290649
ENSG00000074755.10	ZZEF1	0.0682004	0.730204	0.981983	6.3599
ENSG00000074800.9	ENO1	0.0322455	0.884783	0.991663	9.39629
ENSG00000074842.3	C19orf10	-0.210514	0.449247	0.924624	6.23494
ENSG00000074855.6	ANO8	-0.26605	0.243756	0.811831	5.81914
ENSG00000074935.9	TUBE1	0.42093	0.318286	0.866561	5.5869
ENSG00000074964.12	ARHGEF10L	-0.464729	0.330151	0.871886	4.80731
ENSG00000074966.6	TXK	0.962317	0.166479	0.730991	-0.275811
ENSG00000075043.13	KCNQ2	-0.761707	0.125395	0.673612	2.62763
ENSG00000075073.10	TACR2	0.139763	0.78969	0.984858	0.779848
ENSG00000075089.5	ACTR6	-0.0276662	0.914053	0.995489	5.40614
ENSG00000075131.5	TIPIN	-0.319734	0.370218	0.891397	4.52131
ENSG00000075142.9	SRI	0.048554	0.829138	0.988374	5.72972
ENSG00000075151.15	EIF4G3	0.193462	0.381566	0.897005	7.34186
ENSG00000075188.4	NUP37	-0.173007	0.565291	0.955078	5.29372
ENSG00000075218.14	GTSE1	-0.345408	0.573065	0.95636	5.69816
ENSG00000075223.9	SEMA3C	0.0321843	0.950801	0.99802	5.67205
ENSG00000075234.12	TTC38	-0.169673	0.423798	0.914046	5.24553
ENSG00000075239.9	ACAT1	-0.624338	0.0115919	0.273197	6.24156
ENSG00000075240.12	GRAMD4	0.11986	0.585046	0.958605	4.85232
ENSG00000075275.12	CELSR1	2.0451	6.44916e-05	0.0177371	6.24703
ENSG00000075290.7	WNT8B	0.611407	0.0780571	0.582289	2.40556
ENSG00000075292.14	ZNF638	0.0280243	0.878349	0.991396	7.6508
ENSG00000075303.8	SLC25A40	-0.0509764	0.858018	0.989514	5.97582
ENSG00000075336.7	TIMM21	0.0888872	0.706447	0.976868	5.14081
ENSG00000075391.12	RASAL2	0.263981	0.278482	0.839109	5.33277
ENSG00000075399.8	VPS9D1	-0.0788547	0.797566	0.985106	4.95662
ENSG00000075407.13	ZNF37A	-0.0928232	0.711256	0.978441	6.50266
ENSG00000075413.13	MARK3	-0.0151747	0.935448	0.996397	6.69124
ENSG00000075415.8	SLC25A3	-0.094462	0.634119	0.965874	9.269
ENSG00000075420.8	FNDC3B	-0.110379	0.674047	0.970628	4.80067
ENSG00000075426.7	FOSL2	0.423866	0.182407	0.754541	4.12226
ENSG00000075461.5	CACNG4	1.62646	0.0190314	0.333717	0.544956
ENSG00000075539.9	FRYL	0.384645	0.0576773	0.519613	6.44016
ENSG00000075568.12	TMEM131	-0.216613	0.268433	0.830802	6.65512
ENSG00000075618.13	FSCN1	0.18462	0.734143	0.981983	3.7121
ENSG00000075624.9	ACTB	-0.0191532	0.94065	0.997046	10.8328
ENSG00000075643.5	MOCOS	-0.247592	0.590341	0.959255	4.93476
ENSG00000075651.11	PLD1	1.49668	0.0072518	0.229051	-0.0415826
ENSG00000075673.7	ATP12A	-0.172725	0.797876	0.985106	-0.352195
ENSG00000075702.12	WDR62	-0.318471	0.506304	0.939532	5.37132
ENSG00000075711.16	DLG1	0.0741054	0.687533	0.97414	7.00362
ENSG00000075785.8	RAB7A	0.0626685	0.741283	0.981983	8.1348
ENSG00000075790.6	BCAP29	0.00276621	0.991043	0.999585	6.32574
ENSG00000075826.12	SEC31B	-0.0875118	0.836832	0.988374	4.30223
ENSG00000075856.7	SART3	0.0142558	0.93875	0.997046	7.15334
ENSG00000075884.8	ARHGAP15	0.101657	0.740739	0.981983	2.2342
ENSG00000075886.10	TUBA3D	0.0209968	0.960813	0.99802	1.50478
ENSG00000075891.17	PAX2	0.38321	0.381322	0.897005	2.11335
ENSG00000075914.8	EXOSC7	-0.0535788	0.816028	0.986086	4.72573
ENSG00000075945.8	KIFAP3	0.0317621	0.882661	0.991663	6.12531
ENSG00000075975.11	MKRN2	0.0809558	0.682005	0.97271	4.70649
ENSG00000076003.4	MCM6	-0.0534116	0.897002	0.993024	6.57882
ENSG00000076043.5	REXO2	0.289678	0.146072	0.70813	5.25555
ENSG00000076053.6	RBM7	-0.138615	0.51476	0.941776	3.86473
ENSG00000076067.7	RBMS2	-0.155178	0.571042	0.956058	3.74374
ENSG00000076108.7	BAZ2A	-0.0133286	0.941051	0.997046	8.98042
ENSG00000076201.10	PTPN23	-0.1599	0.402299	0.904866	6.74294
ENSG00000076242.10	MLH1	-0.111359	0.619866	0.962834	6.37593
ENSG00000076248.6	UNG	-0.207778	0.443882	0.922034	7.52599
ENSG00000076258.5	FMO4	0.229717	0.494928	0.937001	1.86424
ENSG00000076321.6	KLHL20	0.0626364	0.726355	0.981983	4.73472
ENSG00000076344.11	RGS11	-0.287115	0.536302	0.946682	4.84616
ENSG00000076351.8	SLC46A1	-0.291288	0.250808	0.816266	3.38312
ENSG00000076356.6	PLXNA2	0.452995	0.198091	0.773588	6.04002
ENSG00000076382.12	SPAG5	-0.326869	0.523199	0.943238	6.80331
ENSG00000076513.12	ANKRD13A	0.0531626	0.757347	0.982554	6.30925
ENSG00000076554.11	TPD52	0.261265	0.201605	0.778276	7.41498
ENSG00000076555.11	ACACB	0.0169325	0.950177	0.99802	4.6729
ENSG00000076604.10	TRAF4	-0.120391	0.594853	0.959791	6.89367
ENSG00000076641.4	PAG1	0.475515	0.132823	0.683873	5.29694
ENSG00000076650.2	GPATCH1	0.029568	0.885723	0.991663	4.21934
ENSG00000076662.5	ICAM3	0.164545	0.624977	0.963616	4.14014
ENSG00000076685.14	NT5C2	0.139404	0.454039	0.926479	5.04942
ENSG00000076706.10	MCAM	-0.399379	0.414169	0.908513	2.28801
ENSG00000076716.7	GPC4	-0.191877	0.546571	0.950156	4.55168
ENSG00000076770.10	MBNL3	-0.272751	0.577296	0.9573	4.15209
ENSG00000076826.5	CAMSAP3	0.0440498	0.842379	0.989329	6.49075
ENSG00000076864.15	RAP1GAP	2.93202	0.000575153	0.0648656	7.8365
ENSG00000076924.7	XAB2	-0.0514227	0.776837	0.983599	6.33474
ENSG00000076928.13	ARHGEF1	-0.17892	0.385547	0.898633	5.42082
ENSG00000076944.10	STXBP2	0.0790319	0.745528	0.981983	5.54477
ENSG00000076984.13	MAP2K7	-0.0737763	0.725467	0.981983	6.13166
ENSG00000077009.9	NMRK2	0.122648	0.839053	0.988478	-0.77998
ENSG00000077044.5	DGKD	-0.325949	0.216536	0.790517	5.45112
ENSG00000077063.6	CTTNBP2	1.26998	0.0969116	0.621144	1.65736
ENSG00000077080.5	ACTL6B	0.0633366	0.816568	0.986106	4.22734
ENSG00000077092.14	RARB	0.287262	0.391105	0.900765	3.44222
ENSG00000077097.9	TOP2B	0.0852661	0.639377	0.966137	8.20982
ENSG00000077147.10	TM9SF3	-0.0602789	0.768754	0.983598	8.33664
ENSG00000077150.13	NFKB2	-0.125816	0.650049	0.967036	6.17315
ENSG00000077152.5	UBE2T	-0.270318	0.581313	0.957342	6.55481
ENSG00000077157.16	PPP1R12B	-0.113187	0.63468	0.965874	6.41213
ENSG00000077232.12	DNAJC10	0.313727	0.148726	0.710313	8.33627
ENSG00000077235.13	GTF3C1	0.33461	0.285415	0.843516	7.88471
ENSG00000077238.9	IL4R	-1.81503	0.00333567	0.156062	0.683877
ENSG00000077254.10	USP33	-0.0160453	0.930054	0.996397	6.28104
ENSG00000077264.10	PAK3	0.107992	0.831949	0.988374	2.16485
ENSG00000077312.4	SNRPA	-0.0447636	0.859816	0.989899	6.36545
ENSG00000077348.4	EXOSC5	0.0451816	0.846841	0.989514	4.42074
ENSG00000077380.11	DYNC1I2	0.211249	0.355182	0.886254	5.10339
ENSG00000077454.11	LRCH4	0.132549	0.643942	0.966237	6.58456
ENSG00000077458.8	FAM76B	-0.519513	0.0727005	0.569711	5.29483
ENSG00000077463.10	SIRT6	-0.0954357	0.691067	0.974898	5.04028
ENSG00000077514.4	POLD3	-0.100659	0.770554	0.983599	5.60221
ENSG00000077522.8	ACTN2	0.240441	0.793911	0.985106	2.01595
ENSG00000077549.13	CAPZB	-0.159969	0.454077	0.926479	7.34133
ENSG00000077585.9	GPR137B	0.266612	0.253742	0.817345	3.79406
ENSG00000077616.6	NAALAD2	-0.0135778	0.973669	0.99892	1.69742
ENSG00000077684.11	PHF17	-0.304429	0.27046	0.832976	6.10689
ENSG00000077713.14	SLC25A43	-0.368302	0.215748	0.78994	4.20481
ENSG00000077721.11	UBE2A	-0.102534	0.636912	0.966137	5.86137
ENSG00000077782.15	FGFR1	0.254262	0.464118	0.928868	4.25781
ENSG00000077800.7	FKBP6	0.368283	0.56894	0.955709	-0.748874
ENSG00000077809.8	GTF2I	0.40939	0.110461	0.649646	6.92416
ENSG00000077935.12	SMC1B	-0.544892	0.303104	0.85691	3.84307
ENSG00000077942.13	FBLN1	0.0475401	0.943558	0.998002	3.37072
ENSG00000078018.15	MAP2	-0.176106	0.723004	0.981536	6.84358
ENSG00000078043.11	PIAS2	-0.0214067	0.91162	0.995277	5.40093
ENSG00000078053.12	AMPH	-1.13529	0.201942	0.778276	0.941307
ENSG00000078061.8	ARAF	-0.0584352	0.82438	0.988374	6.11957
ENSG00000078070.7	MCCC1	0.0703706	0.776615	0.983599	6.12348
ENSG00000078081.3	LAMP3	0.574468	0.574749	0.956813	3.74385
ENSG00000078114.14	NEBL	0.0363326	0.927864	0.996397	5.34115
ENSG00000078124.7	ACER3	-0.734926	0.0120304	0.274358	6.03649
ENSG00000078140.9	UBE2K	-0.196434	0.342225	0.878879	7.73983
ENSG00000078142.7	PIK3C3	0.016096	0.946462	0.99802	5.41748
ENSG00000078177.9	N4BP2	-0.377623	0.251629	0.816266	5.66068
ENSG00000078237.4	C12orf5	-0.325824	0.36298	0.888489	2.62034
ENSG00000078246.11	TULP3	-0.0054054	0.982708	0.99892	5.88964
ENSG00000078269.9	SYNJ2	-0.457286	0.090975	0.606392	4.45102
ENSG00000078304.15	PPP2R5C	-0.0855622	0.666185	0.970407	6.78733
ENSG00000078319.7	PMS2P1	0.84996	0.00260406	0.139737	2.29568
ENSG00000078328.15	RBFOX1	0.245638	0.71331	0.979494	-0.898762
ENSG00000078369.13	GNB1	0.0501296	0.839587	0.988478	8.8031
ENSG00000078399.11	HOXA9	1.24936	0.00016063	0.0307085	2.46724
ENSG00000078401.6	EDN1	0.113777	0.772014	0.983599	3.20139
ENSG00000078403.12	MLLT10	0.0864674	0.738776	0.981983	5.89188
ENSG00000078487.13	ZCWPW1	0.468452	0.250755	0.816266	2.12469
ENSG00000078596.6	ITM2A	-0.186927	0.797856	0.985106	-0.0760399
ENSG00000078618.15	NRD1	0.114998	0.511806	0.941233	7.40265
ENSG00000078668.9	VDAC3	0.0145576	0.952254	0.99802	6.85626
ENSG00000078674.13	PCM1	0.174742	0.345736	0.882555	8.05263
ENSG00000078687.12	TNRC6C	0.331316	0.151757	0.714138	4.73405
ENSG00000078699.17	CBFA2T2	-0.0639213	0.825337	0.988374	5.7693
ENSG00000078725.8	BRINP1	0.305042	0.698005	0.975337	1.30031
ENSG00000078747.8	ITCH	-0.0599477	0.722436	0.981373	6.52417
ENSG00000078795.12	PKD2L2	0.0905917	0.86721	0.990279	-0.486263
ENSG00000078804.8	TP53INP2	-0.899187	0.00188906	0.118668	5.92554
ENSG00000078808.12	SDF4	0.032553	0.875001	0.991387	7.3108
ENSG00000078814.11	MYH7B	0.620757	0.0779855	0.582289	1.85117
ENSG00000078900.10	TP73	-0.784623	0.127036	0.675225	3.01853
ENSG00000078902.11	TOLLIP	0.259478	0.32887	0.871178	5.43689
ENSG00000078967.8	UBE2D4	0.570229	0.0149238	0.302063	5.19151
ENSG00000079101.12	CLUL1	0.0390355	0.920534	0.995541	1.43397
ENSG00000079112.5	CDH17	-0.324154	0.554927	0.951903	3.6085
ENSG00000079134.7	THOC1	-0.0946416	0.664042	0.970407	6.02107
ENSG00000079150.13	FKBP7	-0.937842	0.00926478	0.249586	2.05381
ENSG00000079156.12	OSBPL6	-0.959058	0.00495561	0.187769	3.72055
ENSG00000079215.9	SLC1A3	0.59789	0.242415	0.810617	3.27457
ENSG00000079246.11	XRCC5	-0.0662525	0.792718	0.985106	8.84363
ENSG00000079257.3	LXN	0.0120527	0.985038	0.99892	3.43868
ENSG00000079277.15	MKNK1	-0.0670749	0.779456	0.983599	4.35885
ENSG00000079308.12	TNS1	-1.7499	0.00127499	0.0992536	2.58593
ENSG00000079313.7	REXO1	-0.039163	0.825607	0.988374	5.75753
ENSG00000079332.10	SAR1A	-0.0146997	0.932096	0.996397	6.9315
ENSG00000079335.13	CDC14A	0.0306638	0.932927	0.996397	4.12537
ENSG00000079337.11	RAPGEF3	1.20509	0.00620688	0.210414	1.70718
ENSG00000079385.17	CEACAM1	0.108263	0.804528	0.985122	1.22694
ENSG00000079387.9	SENP1	0.0375408	0.887727	0.991946	6.29924
ENSG00000079432.3	CIC	-0.272156	0.179604	0.750044	6.75162
ENSG00000079435.5	LIPE	-0.456827	0.121523	0.665159	2.98685
ENSG00000079459.8	FDFT1	-0.771474	0.0753674	0.575619	9.07368
ENSG00000079462.3	PAFAH1B3	-0.230107	0.467457	0.929048	6.09452
ENSG00000079482.11	OPHN1	-0.529238	0.0678565	0.555454	3.82059
ENSG00000079616.8	KIF22	-0.176039	0.597818	0.960541	6.7402
ENSG00000079689.9	SCGN	0.766854	0.216446	0.790517	1.62789
ENSG00000079691.15	LRRC16A	0.138561	0.461364	0.928362	5.2418
ENSG00000079739.11	PGM1	0.348313	0.113972	0.654005	4.3937
ENSG00000079785.10	DDX1	-0.12646	0.511276	0.941233	7.40536
ENSG00000079805.12	DNM2	0.0237229	0.892102	0.992788	7.71915
ENSG00000079819.12	EPB41L2	-0.57936	0.205428	0.781804	4.06132
ENSG00000079841.14	RIMS1	0.122562	0.764634	0.983058	3.83346
ENSG00000079931.10	MOXD1	-0.897702	0.0338772	0.412701	2.04419
ENSG00000079950.9	STX7	-0.171648	0.543567	0.948839	5.10834
ENSG00000079974.13	RABL2B	0.153431	0.551425	0.951702	3.24456
ENSG00000079999.9	KEAP1	-0.16391	0.372821	0.893212	6.28463
ENSG00000080031.5	PTPRH	-0.118309	0.847345	0.989514	1.28811
ENSG00000080166.11	DCT	1.09367	0.166289	0.730991	1.00955
ENSG00000080189.10	SLC35C2	0.123924	0.510863	0.941233	5.88278
ENSG00000080200.5	CRYBG3	-0.399685	0.190192	0.763942	2.83755
ENSG00000080224.13	EPHA6	-1.80722	4.24177e-05	0.0140375	4.176
ENSG00000080298.11	RFX3	-0.0669029	0.795872	0.985106	5.22916
ENSG00000080345.13	RIF1	-0.144083	0.516903	0.942823	6.58947
ENSG00000080371.4	RAB21	-0.18735	0.345497	0.882509	7.19959
ENSG00000080493.9	SLC4A4	-0.552342	0.277329	0.838763	2.53158
ENSG00000080503.15	SMARCA2	-0.16106	0.399351	0.904145	7.19297
ENSG00000080546.9	SESN1	-0.291182	0.457665	0.927876	4.16583
ENSG00000080561.9	MID2	-0.293548	0.257702	0.822243	3.15863
ENSG00000080603.12	SRCAP	-0.131603	0.455998	0.927804	7.79593
ENSG00000080608.9	KIAA0020	-0.0737426	0.715124	0.980117	6.21413
ENSG00000080618.9	CPB2	0.186053	0.754538	0.982365	-0.831644
ENSG00000080644.11	CHRNA3	-0.663746	0.11935	0.660146	2.76988
ENSG00000080709.10	KCNN2	0.145542	0.692857	0.974926	3.82963
ENSG00000080802.14	CNOT4	0.49787	0.0349334	0.418634	5.47086
ENSG00000080815.14	PSEN1	0.0467652	0.79381	0.985106	6.17971
ENSG00000080819.2	CPOX	-0.271706	0.212957	0.787689	4.89683
ENSG00000080822.12	CLDND1	-0.0517198	0.804932	0.985122	6.0793
ENSG00000080823.17	MOK	-0.542483	0.0616643	0.535426	4.2262
ENSG00000080824.14	HSP90AA1	0.182968	0.556156	0.952134	10.3956
ENSG00000080839.7	RBL1	-0.303066	0.418157	0.910576	4.7364
ENSG00000080845.13	DLGAP4	0.158048	0.526368	0.943594	5.85362
ENSG00000080854.10	IGSF9B	-0.967024	0.195406	0.771041	0.115579
ENSG00000080947.10	CROCCP3	0.0393427	0.903748	0.993717	2.68025
ENSG00000080986.8	NDC80	-0.383968	0.50357	0.939532	5.497
ENSG00000081014.6	AP4E1	-0.05863	0.801365	0.985122	5.12698
ENSG00000081019.9	RSBN1	0.217327	0.335306	0.873694	4.87202
ENSG00000081026.14	MAGI3	-0.240643	0.345019	0.882077	5.36146
ENSG00000081051.3	AFP	0.229158	0.77947	0.983599	-0.849309
ENSG00000081052.10	COL4A4	-0.558246	0.143683	0.705702	1.22453
ENSG00000081059.15	TCF7	-0.407068	0.265195	0.82939	2.45987
ENSG00000081087.10	OSTM1	0.0695717	0.789641	0.984858	4.78636
ENSG00000081138.9	CDH7	-1.04378	0.0237806	0.361373	3.99365
ENSG00000081148.11	IMPG2	-0.00130949	0.998303	0.999758	0.611749
ENSG00000081154.7	PCNP	-0.146642	0.399415	0.904166	7.06497
ENSG00000081177.14	EXD2	-0.226529	0.249556	0.815961	5.27915
ENSG00000081181.3	ARG2	-1.37965	0.00121614	0.0974967	4.52415
ENSG00000081189.9	MEF2C	0.122589	0.771831	0.983599	2.62781
ENSG00000081277.7	PKP1	0.851119	0.0888127	0.60261	2.76538
ENSG00000081307.8	UBA5	-0.107696	0.600311	0.960541	6.10808
ENSG00000081320.6	STK17B	-0.248693	0.477958	0.932451	3.73542
ENSG00000081377.12	CDC14B	0.468732	0.124867	0.671496	3.58613
ENSG00000081386.8	ZNF510	0.306456	0.139941	0.697154	4.93806
ENSG00000081479.8	LRP2	0.9677	0.0913585	0.607423	2.04112
ENSG00000081665.9	ZNF506	0.556944	0.0447651	0.47133	4.86702
ENSG00000081692.8	JMJD4	-0.13444	0.616789	0.962834	3.4564
ENSG00000081721.7	DUSP12	-0.154151	0.530778	0.945005	5.08842
ENSG00000081760.12	AACS	-0.38274	0.0443426	0.468591	6.82258
ENSG00000081791.4	KIAA0141	0.0538958	0.802045	0.985122	6.36087
ENSG00000081803.11	CADPS2	2.10663	0.000129575	0.027955	5.72483
ENSG00000081818.1	PCDHB4	0.384375	0.448512	0.924469	0.851068
ENSG00000081842.13	PCDHA6	1.10381	0.00191635	0.119172	1.57982
ENSG00000081853.13	PCDHGA2	1.0575	0.0108682	0.268339	0.983452
ENSG00000081870.7	HSPB11	-0.278862	0.282971	0.841562	4.3605
ENSG00000081913.9	PHLPP1	-0.415536	0.0593916	0.526455	4.89454
ENSG00000081923.6	ATP8B1	-0.0121557	0.962227	0.998024	5.90904
ENSG00000081985.6	IL12RB2	0.203593	0.704586	0.976313	-0.0881764
ENSG00000082014.12	SMARCD3	0.798508	0.0949343	0.615086	4.5156
ENSG00000082068.4	WDR70	0.0204443	0.93183	0.996397	5.42382
ENSG00000082146.8	STRADB	-0.17121	0.567089	0.955078	3.53938
ENSG00000082153.13	BZW1	0.274564	0.360673	0.888311	6.48937
ENSG00000082175.10	PGR	-1.1412	0.0285328	0.383797	-0.354854
ENSG00000082196.16	C1QTNF3	0.616653	0.141925	0.702305	1.15593
ENSG00000082212.7	ME2	0.296411	0.248635	0.815961	6.03065
ENSG00000082213.13	C5orf22	0.00982132	0.961019	0.99802	6.03289
ENSG00000082258.8	CCNT2	0.244102	0.181823	0.753799	5.26701
ENSG00000082269.12	FAM135A	0.600069	0.0360342	0.425127	5.23432
ENSG00000082293.8	COL19A1	-0.0366805	0.945225	0.99802	-0.199669
ENSG00000082397.11	EPB41L3	-0.832354	0.198776	0.774298	-0.93601
ENSG00000082438.11	COBLL1	0.0846183	0.68632	0.973518	6.26273
ENSG00000082458.7	DLG3	-0.156688	0.639609	0.966137	6.76397
ENSG00000082482.9	KCNK2	2.72905	0.00772309	0.235052	-0.705062
ENSG00000082497.7	SERTAD4	-0.467033	0.437697	0.919608	-0.57979
ENSG00000082512.10	TRAF5	-0.239961	0.54285	0.948728	3.63273
ENSG00000082515.12	MRPL22	0.0817889	0.730014	0.981983	4.39301
ENSG00000082516.8	GEMIN5	0.154044	0.50875	0.940949	5.66742
ENSG00000082641.11	NFE2L1	-0.221912	0.455405	0.927348	7.90766
ENSG00000082684.10	SEMA5B	0.205331	0.750243	0.982005	-0.910156
ENSG00000082701.10	GSK3B	0.0694058	0.696533	0.975173	7.53966
ENSG00000082781.7	ITGB5	0.589397	0.0549269	0.511404	6.91036
ENSG00000082805.15	ERC1	-0.0489524	0.809016	0.985702	5.87566
ENSG00000082898.12	XPO1	-0.0661835	0.701524	0.976313	8.36357
ENSG00000082996.15	RNF13	-0.212647	0.320095	0.867816	5.38113
ENSG00000083093.5	PALB2	-0.134469	0.524382	0.943425	4.11548
ENSG00000083097.10	DOPEY1	0.452779	0.208968	0.784875	5.63224
ENSG00000083099.6	LYRM2	0.0278508	0.891645	0.992736	5.69645
ENSG00000083123.10	BCKDHB	-0.482265	0.0455077	0.473631	5.1895
ENSG00000083168.5	KAT6A	-0.146571	0.433591	0.916742	7.41455
ENSG00000083223.13	ZCCHC6	-0.0242046	0.925336	0.996193	5.66557
ENSG00000083290.15	ULK2	-0.147778	0.562786	0.954713	5.28601
ENSG00000083307.6	GRHL2	0.508627	0.0743505	0.572898	7.32596
ENSG00000083312.13	TNPO1	0.128963	0.491393	0.937001	8.01612
ENSG00000083444.12	PLOD1	-0.130465	0.605817	0.961407	5.63444
ENSG00000083454.17	P2RX5	0.299265	0.189221	0.763942	3.63966
ENSG00000083457.7	ITGAE	-0.0367702	0.909688	0.994957	3.95648
ENSG00000083520.10	DIS3	0.153168	0.428089	0.914694	6.54852
ENSG00000083535.11	PIBF1	-0.0237469	0.919545	0.995541	4.80363
ENSG00000083544.9	TDRD3	-0.0552336	0.776105	0.983599	5.03929
ENSG00000083635.7	NUFIP1	0.0255975	0.929442	0.996397	3.78419
ENSG00000083642.14	PDS5B	-0.572267	0.0477422	0.482939	4.51673
ENSG00000083720.8	OXCT1	-0.461495	0.117043	0.655829	7.33094
ENSG00000083750.8	RRAGB	-0.219561	0.410519	0.907541	3.68307
ENSG00000083782.3	EPYC	0.11661	0.891092	0.992736	-0.612554
ENSG00000083799.13	CYLD	-0.457977	0.138864	0.69586	4.94871
ENSG00000083807.5	SLC27A5	0.0441332	0.857408	0.989514	3.89419
ENSG00000083812.7	ZNF324	-0.0163745	0.947109	0.99802	4.60417
ENSG00000083814.8	ZNF671	0.0862753	0.85569	0.989514	1.23878
ENSG00000083817.8	ZNF416	-0.351879	0.161503	0.725456	2.56673
ENSG00000083828.11	ZNF586	-0.0923425	0.664567	0.970407	4.22769
ENSG00000083838.11	ZNF446	0.0245223	0.914977	0.995541	4.37418
ENSG00000083844.6	ZNF264	-0.122928	0.552829	0.951903	4.16437
ENSG00000083845.4	RPS5	-0.033591	0.905839	0.994257	9.16415
ENSG00000083857.9	FAT1	0.0949006	0.714628	0.980117	7.28777
ENSG00000083896.8	YTHDC1	0.0312575	0.861582	0.989921	6.73406
ENSG00000083937.4	CHMP2B	-0.011422	0.953008	0.99802	6.71137
ENSG00000084070.7	SMAP2	-0.105329	0.670552	0.970407	5.90256
ENSG00000084072.12	PPIE	0.0829447	0.731162	0.981983	4.9906
ENSG00000084073.4	ZMPSTE24	0.00366142	0.98801	0.999469	6.62134
ENSG00000084090.9	STARD7	-0.0624611	0.764013	0.982826	7.57667
ENSG00000084092.6	NOA1	-0.0721264	0.727642	0.981983	6.10773
ENSG00000084093.11	REST	-0.214868	0.332104	0.872392	6.75845
ENSG00000084112.10	SSH1	-0.0570878	0.798474	0.985122	6.18321
ENSG00000084234.12	APLP2	-0.0370201	0.875818	0.991387	8.93546
ENSG00000084444.9	KIAA1467	-0.213157	0.556858	0.952242	6.99875
ENSG00000084453.12	SLCO1A2	0.275459	0.588149	0.958962	1.65564
ENSG00000084463.3	WBP11	-0.11324	0.621575	0.962834	7.24943
ENSG00000084623.7	EIF3I	0.200106	0.359726	0.886964	7.60855
ENSG00000084628.5	NKAIN1	0.0291345	0.938744	0.997046	3.41671
ENSG00000084636.13	COL16A1	-0.237104	0.760257	0.982554	2.83805
ENSG00000084652.11	TXLNA	-0.120067	0.488921	0.936568	7.04408
ENSG00000084674.9	APOB	-0.84861	0.171712	0.738414	-0.50122
ENSG00000084676.11	NCOA1	-0.0674289	0.774245	0.983599	5.58245
ENSG00000084693.11	AGBL5	0.0284758	0.889014	0.992247	6.17677
ENSG00000084710.9	EFR3B	0.766407	0.0809878	0.585541	1.38306
ENSG00000084731.9	KIF3C	0.0673748	0.820375	0.987462	3.91618
ENSG00000084733.6	RAB10	0.154266	0.404256	0.905735	7.79692
ENSG00000084754.6	HADHA	0.0792031	0.641942	0.96615	8.26812
ENSG00000084764.6	MAPRE3	0.397179	0.17016	0.736413	4.69115
ENSG00000084774.9	CAD	-0.0848012	0.659297	0.969351	7.33642
ENSG00000085063.10	CD59	-0.109411	0.639371	0.966137	5.57633
ENSG00000085117.7	CD82	-0.240402	0.504811	0.939532	2.13273
ENSG00000085185.11	BCORL1	0.155105	0.52641	0.943594	6.40506
ENSG00000085224.16	ATRX	0.0797451	0.720005	0.981297	7.80328
ENSG00000085231.9	TAF9	0.134446	0.485627	0.936022	6.57086
ENSG00000085274.11	MYNN	0.0284471	0.918143	0.995541	6.59967
ENSG00000085276.13	MECOM	0.207543	0.485261	0.936022	4.19976
ENSG00000085365.13	SCAMP1	-0.0325981	0.853992	0.989514	7.03098
ENSG00000085377.9	PREP	-0.0213738	0.91384	0.995489	5.27091
ENSG00000085382.7	HACE1	-0.282536	0.226343	0.798844	5.03858
ENSG00000085415.11	SEH1L	0.0221601	0.921875	0.995541	6.28873
ENSG00000085433.11	WDR47	0.275146	0.22491	0.798246	4.41736
ENSG00000085449.10	WDFY1	-0.302323	0.129066	0.678391	5.9694
ENSG00000085465.11	OVGP1	-0.121132	0.789273	0.984778	2.31744
ENSG00000085491.11	SLC25A24	-0.673449	0.00224692	0.128888	4.52103
ENSG00000085511.15	MAP3K4	-0.23801	0.300611	0.854955	5.22374
ENSG00000085514.11	PILRA	0.615875	0.335745	0.874126	1.15552
ENSG00000085552.12	IGSF9	-0.102287	0.79099	0.984973	5.67697
ENSG00000085563.10	ABCB1	0.417277	0.462462	0.928362	-0.0771281
ENSG00000085644.9	ZNF213	0.121907	0.595986	0.959951	5.01354
ENSG00000085719.7	CPNE3	-0.0909322	0.596367	0.959951	7.31004
ENSG00000085721.8	RRN3	0.0431116	0.82448	0.988374	6.1474
ENSG00000085733.11	CTTN	0.094363	0.607994	0.961781	8.24926
ENSG00000085741.8	WNT11	-0.617884	0.309441	0.86119	-0.471852
ENSG00000085760.10	MTIF2	0.0785662	0.725888	0.981983	5.32758
ENSG00000085788.9	DDHD2	-0.133935	0.46704	0.928868	6.13424
ENSG00000085831.11	TTC39A	0.250801	0.415546	0.909658	5.90341
ENSG00000085832.12	EPS15	0.167966	0.376551	0.895219	6.72607
ENSG00000085840.8	ORC1	-0.440697	0.376371	0.895149	4.69526
ENSG00000085871.4	MGST2	0.321332	0.324672	0.868944	5.12962
ENSG00000085872.10	CHERP	-0.0391023	0.828887	0.988374	6.43861
ENSG00000085978.17	ATG16L1	0.218904	0.355532	0.886254	4.98163
ENSG00000085982.9	USP40	-0.27527	0.177123	0.7469	6.20973
ENSG00000085998.9	POMGNT1	0.0893528	0.651986	0.967839	7.54927
ENSG00000085999.7	RAD54L	-0.378999	0.379812	0.896729	4.38189
ENSG00000086015.16	MAST2	0.484146	0.0926228	0.610613	7.50343
ENSG00000086061.11	DNAJA1	0.0116018	0.960717	0.99802	8.29095
ENSG00000086062.8	B4GALT1	-0.197425	0.48479	0.935645	6.78936
ENSG00000086065.9	CHMP5	0.0241616	0.895154	0.993024	6.4252
ENSG00000086102.14	NFX1	0.131909	0.486805	0.936244	7.2792
ENSG00000086159.8	AQP6	0.450186	0.532001	0.945293	-0.938369
ENSG00000086189.5	DIMT1	-0.0507599	0.815584	0.986086	5.83949
ENSG00000086200.12	IPO11	-0.0649377	0.814924	0.986086	4.70659
ENSG00000086205.12	FOLH1	0.161237	0.706494	0.976868	8.119
ENSG00000086232.8	EIF2AK1	0.219801	0.362499	0.888489	8.05326
ENSG00000086289.7	EPDR1	0.00415509	0.991914	0.999585	5.26397
ENSG00000086300.11	SNX10	-0.237869	0.62035	0.962834	3.65076
ENSG00000086475.10	SEPHS1	-0.0557555	0.798535	0.985122	6.11892
ENSG00000086504.11	MRPL28	0.16215	0.493542	0.937001	5.97219
ENSG00000086506.2	HBQ1	-0.040103	0.919347	0.995541	2.6284
ENSG00000086544.2	ITPKC	0.347978	0.328341	0.870606	5.39997
ENSG00000086548.8	CEACAM6	-0.293644	0.756352	0.982554	2.20092
ENSG00000086570.8	FAT2	0.36955	0.336023	0.874169	0.883276
ENSG00000086589.7	RBM22	-0.282328	0.137146	0.693995	6.1718
ENSG00000086598.6	TMED2	-0.0828481	0.712161	0.978764	9.01687
ENSG00000086619.9	ERO1LB	-0.265356	0.527231	0.94364	3.54086
ENSG00000086666.14	ZFAND6	-0.0202831	0.909869	0.994957	5.51925
ENSG00000086712.8	TXLNG	0.719206	0.0141436	0.298135	5.57061
ENSG00000086717.14	PPEF1	0.448224	0.440926	0.920969	-0.564773
ENSG00000086730.12	LAT2	-1.06545	0.0611895	0.533487	4.03495
ENSG00000086758.11	HUWE1	0.000565075	0.997477	0.999742	8.77557
ENSG00000086827.4	ZW10	-0.122102	0.610179	0.961781	5.32233
ENSG00000086848.10	ALG9	-0.163164	0.510563	0.941233	4.09981
ENSG00000086967.9	MYBPC2	0.569643	0.318973	0.867075	-0.515194
ENSG00000087008.11	ACOX3	0.595894	0.0209683	0.342605	3.01967
ENSG00000087053.14	MTMR2	0.239323	0.27716	0.838644	5.96135
ENSG00000087074.7	PPP1R15A	-1.02207	0.0565032	0.516682	6.80235
ENSG00000087076.4	HSD17B14	0.312396	0.512641	0.941256	0.98361
ENSG00000087077.7	TRIP6	0.493378	0.2365	0.804335	4.08759
ENSG00000087085.9	ACHE	-0.317109	0.575744	0.957124	3.9514
ENSG00000087086.9	FTL	0.450174	0.047281	0.481388	8.17801
ENSG00000087087.14	SRRT	-0.166948	0.43524	0.917547	7.83701
ENSG00000087088.15	BAX	-0.154956	0.571668	0.956229	6.13575
ENSG00000087095.8	NLK	0.0242264	0.901297	0.993628	5.02206
ENSG00000087111.16	PIGS	-0.105496	0.579966	0.957342	6.97171
ENSG00000087152.11	ATXN7L3	0.00827326	0.96278	0.998132	6.30405
ENSG00000087157.14	PGS1	0.0682145	0.791324	0.984973	4.12176
ENSG00000087191.8	PSMC5	-0.200799	0.388699	0.900765	6.96129
ENSG00000087206.12	UIMC1	0.0079628	0.970602	0.998451	5.26609
ENSG00000087253.7	LPCAT2	-0.39246	0.553409	0.951903	0.953077
ENSG00000087258.9	GNAO1	-0.69749	0.192017	0.766892	1.03344
ENSG00000087263.12	OGFOD1	0.106907	0.545172	0.949623	5.93655
ENSG00000087266.11	SH3BP2	-0.184385	0.387631	0.900472	7.25752
ENSG00000087269.11	NOP14	0.26586	0.117734	0.656782	6.83145
ENSG00000087274.12	ADD1	0.0581692	0.7556	0.982526	7.88222
ENSG00000087299.7	L2HGDH	-0.141442	0.574027	0.956686	4.49915
ENSG00000087301.4	TXNDC16	-0.489295	0.0811932	0.585753	6.18977
ENSG00000087302.4	C14orf166	0.0233	0.907021	0.994412	6.33994
ENSG00000087303.12	NID2	-0.503724	0.226925	0.798848	2.10943
ENSG00000087338.4	GMCL1	-0.257459	0.230875	0.802926	5.5145
ENSG00000087365.10	SF3B2	-0.031498	0.86838	0.990279	8.31437
ENSG00000087448.5	KLHL42	-0.0599292	0.752418	0.982108	6.83746
ENSG00000087460.19	GNAS	0.219131	0.233055	0.803593	9.28379
ENSG00000087470.13	DNM1L	0.0551011	0.741486	0.981983	7.60046
ENSG00000087494.11	PTHLH	-0.114151	0.822252	0.987772	1.2341
ENSG00000087502.13	ERGIC2	0.16684	0.400955	0.904696	6.50004
ENSG00000087510.5	TFAP2C	-1.17925	0.0577444	0.5197	-0.540542
ENSG00000087586.13	AURKA	-0.0856132	0.875591	0.991387	5.14079
ENSG00000087842.6	PIR	-0.238053	0.524714	0.943591	4.36792
ENSG00000087884.10	AAMDC	-0.0809933	0.839452	0.988478	0.437306
ENSG00000087903.8	RFX2	0.227173	0.503976	0.939532	2.52698
ENSG00000087995.11	METTL2A	0.140184	0.479059	0.932932	4.49151
ENSG00000088002.7	SULT2B1	-0.446799	0.405498	0.906047	0.311752
ENSG00000088035.11	ALG6	-0.209425	0.459271	0.928261	4.40303
ENSG00000088038.13	CNOT3	-0.0431713	0.812194	0.985917	6.6602
ENSG00000088179.4	PTPN4	-0.176099	0.536223	0.946682	4.10595
ENSG00000088205.8	DDX18	0.0793447	0.668318	0.970407	6.06885
ENSG00000088247.11	KHSRP	-0.218241	0.301255	0.855283	8.67808
ENSG00000088256.4	GNA11	-0.0477392	0.791471	0.984973	6.61242
ENSG00000088280.14	ASAP3	0.0063641	0.980765	0.99892	4.38885
ENSG00000088298.8	EDEM2	-0.264496	0.297716	0.854247	4.87416
ENSG00000088305.14	DNMT3B	-0.260639	0.341843	0.878832	4.01538
ENSG00000088325.11	TPX2	-0.33373	0.528674	0.944357	7.38426
ENSG00000088340.11	FER1L4	0.548568	0.367657	0.890856	1.96958
ENSG00000088356.4	PDRG1	0.183592	0.483008	0.935517	4.76851
ENSG00000088367.16	EPB41L1	-0.501369	0.0838557	0.591017	5.55686
ENSG00000088386.11	SLC15A1	-1.13485	0.0503921	0.49407	-0.693112
ENSG00000088387.13	DOCK9	-0.360467	0.0898121	0.604576	5.44504
ENSG00000088448.10	ANKRD10	-0.23557	0.397632	0.903125	5.34828
ENSG00000088451.6	TGDS	-0.12887	0.55668	0.952242	4.35674
ENSG00000088538.12	DOCK3	0.28677	0.388816	0.900765	6.25886
ENSG00000088543.10	C3orf18	-0.0822094	0.829127	0.988374	1.56896
ENSG00000088682.9	COQ9	0.206915	0.296844	0.853236	6.04753
ENSG00000088727.8	KIF9	0.41616	0.138996	0.69586	3.33899
ENSG00000088756.8	ARHGAP28	0.553317	0.401518	0.904696	-0.164983
ENSG00000088766.7	CRLS1	-0.00438368	0.982316	0.99892	5.96095
ENSG00000088808.12	PPP1R13B	0.0405508	0.83074	0.988374	5.8484
ENSG00000088812.13	ATRN	0.0693454	0.813982	0.986041	6.43594
ENSG00000088826.13	SMOX	-0.456561	0.249587	0.815961	2.15086
ENSG00000088832.10	FKBP1A	-0.0860429	0.648107	0.966489	6.63557
ENSG00000088833.13	NSFL1C	0.0530012	0.817826	0.986557	6.31501
ENSG00000088836.8	SLC4A11	0.330755	0.413602	0.908163	3.91904
ENSG00000088854.11	C20orf194	-0.395716	0.38829	0.900765	2.30327
ENSG00000088876.7	ZNF343	-0.0370627	0.859342	0.989899	4.0724
ENSG00000088881.16	EBF4	-0.738891	0.165848	0.730991	2.23706
ENSG00000088888.13	MAVS	0.0435172	0.868456	0.990279	5.90255
ENSG00000088899.10	LZTS3	-0.105156	0.736245	0.981983	2.79026
ENSG00000088930.6	XRN2	0.00616508	0.97444	0.99892	7.46743
ENSG00000088970.11	PLK1S1	-0.360214	0.244603	0.811831	3.08897
ENSG00000088986.6	DYNLL1	0.350368	0.307442	0.860389	7.47549
ENSG00000088992.13	TESC	0.00432857	0.993827	0.999585	0.530376
ENSG00000089006.12	SNX5	-0.0094016	0.962915	0.998168	6.36112
ENSG00000089009.11	RPL6	-0.0748141	0.760623	0.982724	7.68291
ENSG00000089022.9	MAPKAPK5	-0.0360573	0.831736	0.988374	6.21714
ENSG00000089041.12	P2RX7	-0.0561531	0.892331	0.992788	2.11346
ENSG00000089048.10	ESF1	0.182179	0.34115	0.878261	5.88437
ENSG00000089050.10	RBBP9	-0.240165	0.348598	0.883825	5.7287
ENSG00000089053.8	ANAPC5	-0.0861323	0.632747	0.965552	8.18045
ENSG00000089057.10	SLC23A2	-0.240999	0.512089	0.941233	5.2977
ENSG00000089060.7	SLC8B1	-0.0371512	0.886759	0.991751	2.91632
ENSG00000089063.10	TMEM230	0.00759203	0.969703	0.998451	5.80021
ENSG00000089091.12	DZANK1	0.795212	0.0483755	0.484616	2.66717
ENSG00000089094.12	KDM2B	-0.194348	0.318939	0.867075	5.78365
ENSG00000089101.13	C20orf26	0.876418	0.161118	0.72487	-0.582067
ENSG00000089116.3	LHX5	-0.469217	0.424664	0.914357	0.186
ENSG00000089123.11	TASP1	0.119232	0.621333	0.962834	3.76852
ENSG00000089154.6	GCN1L1	0.0143777	0.939912	0.997046	8.53321
ENSG00000089157.11	RPLP0	-0.169101	0.527441	0.94364	10.0701
ENSG00000089159.11	PXN	-0.273022	0.19338	0.767444	6.02087
ENSG00000089163.4	SIRT4	0.166801	0.689785	0.974859	0.544765
ENSG00000089177.13	KIF16B	0.000968704	0.996644	0.999709	5.68594
ENSG00000089195.10	TRMT6	0.0795123	0.701615	0.976313	5.85774
ENSG00000089199.5	CHGB	0.366858	0.261698	0.825521	6.07134
ENSG00000089220.4	PEBP1	-0.200763	0.270962	0.833317	8.84107
ENSG00000089234.11	BRAP	0.139591	0.424885	0.914357	5.76371
ENSG00000089248.6	ERP29	0.111973	0.510927	0.941233	7.65767
ENSG00000089280.14	FUS	-0.414254	0.098482	0.623106	8.25136
ENSG00000089289.11	IGBP1	0.166867	0.582652	0.957951	5.29073
ENSG00000089335.16	ZNF302	0.189928	0.547874	0.950519	4.72271
ENSG00000089351.10	GRAMD1A	-0.44468	0.316644	0.865497	4.2423
ENSG00000089356.12	FXYD3	0.511158	0.186983	0.759934	6.53808
ENSG00000089486.12	CDIP1	-0.106832	0.6227	0.962955	4.76912
ENSG00000089505.13	CMTM1	-0.10599	0.69275	0.974926	2.07512
ENSG00000089558.4	KCNH4	0.335393	0.385578	0.898633	1.83979
ENSG00000089597.12	GANAB	-0.0572779	0.779494	0.983599	9.03871
ENSG00000089639.6	GMIP	0.286631	0.3119	0.863101	4.33616
ENSG00000089682.12	RBM41	-0.0721748	0.725523	0.981983	5.23657
ENSG00000089685.10	BIRC5	-0.2769	0.647967	0.966489	5.29401
ENSG00000089692.4	LAG3	-1.3386	0.000955492	0.0895471	1.46021
ENSG00000089693.6	MLF2	0.0445023	0.809446	0.985702	8.88516
ENSG00000089723.5	OTUB2	0.602872	0.116419	0.654977	2.90484
ENSG00000089737.11	DDX24	0.0422266	0.853104	0.989514	7.78336
ENSG00000089775.7	ZBTB25	0.093181	0.733767	0.981983	4.74707
ENSG00000089818.12	NECAP1	0.0644945	0.753669	0.98215	6.47784
ENSG00000089820.11	ARHGAP4	0.06057	0.886646	0.991751	1.36029
ENSG00000089847.8	ANKRD24	-0.158995	0.589897	0.959255	5.06568
ENSG00000089876.7	DHX32	-0.231828	0.469771	0.929879	5.20174
ENSG00000089902.8	RCOR1	-0.144503	0.4501	0.924677	5.9388
ENSG00000089916.13	GPATCH2L	-0.0125272	0.95485	0.99802	6.40649
ENSG00000090006.13	LTBP4	-0.498914	0.047827	0.483159	6.48426
ENSG00000090013.5	BLVRB	0.0774894	0.837363	0.988374	5.63303
ENSG00000090020.6	SLC9A1	0.267752	0.392529	0.901814	7.46158
ENSG00000090054.9	SPTLC1	0.220974	0.236089	0.804335	5.53183
ENSG00000090060.13	PAPOLA	0.0208854	0.897055	0.993024	8.18047
ENSG00000090061.13	CCNK	-0.0794078	0.643932	0.966237	6.04535
ENSG00000090097.16	PCBP4	-0.0109113	0.964896	0.998198	5.27624
ENSG00000090104.7	RGS1	0.367909	0.609556	0.961781	1.58229
ENSG00000090238.7	YPEL3	0.0271953	0.94234	0.99723	3.60416
ENSG00000090263.11	MRPS33	0.38274	0.0805894	0.584256	5.99515
ENSG00000090266.8	NDUFB2	0.379298	0.149098	0.710313	6.38491
ENSG00000090273.9	NUDC	0.240323	0.284659	0.843493	6.93538
ENSG00000090316.11	MAEA	0.114806	0.498536	0.939532	6.61282
ENSG00000090339.4	ICAM1	1.10418	0.0137536	0.29267	1.21414
ENSG00000090372.10	STRN4	0.0357182	0.860013	0.989899	7.15476
ENSG00000090376.4	IRAK3	-0.142186	0.839628	0.988478	-0.693793
ENSG00000090402.3	SI	-2.74656	4.28957e-05	0.0140375	3.76527
ENSG00000090432.5	MUL1	0.0221524	0.92974	0.996397	4.86083
ENSG00000090447.7	TFAP4	-0.0338529	0.8722	0.99042	5.67265
ENSG00000090470.10	PDCD7	0.182786	0.349979	0.884163	5.14722
ENSG00000090487.6	SPG21	0.0743919	0.705779	0.976868	6.27246
ENSG00000090520.6	DNAJB11	-0.486522	0.155423	0.718682	6.73963
ENSG00000090530.5	LEPREL1	0.00629386	0.991592	0.999585	-0.611435
ENSG00000090539.11	CHRD	-0.642862	0.159178	0.722907	1.06314
ENSG00000090565.11	RAB11FIP3	-0.0553306	0.794375	0.985106	6.83394
ENSG00000090581.5	GNPTG	0.0565518	0.836401	0.988374	5.21597
ENSG00000090612.16	ZNF268	-0.0766461	0.717603	0.980507	5.36899
ENSG00000090615.8	GOLGA3	-0.0679039	0.710331	0.978034	7.80202
ENSG00000090621.9	PABPC4	-0.161054	0.506565	0.939532	7.36343
ENSG00000090661.7	CERS4	0.122493	0.857426	0.989514	2.97228
ENSG00000090674.11	MCOLN1	0.150794	0.643932	0.966237	4.77628
ENSG00000090686.11	USP48	0.102008	0.583066	0.957951	6.61502
ENSG00000090776.5	EFNB1	0.173221	0.430448	0.914694	3.55412
ENSG00000090857.9	PDPR	-0.0730608	0.734061	0.981983	5.43637
ENSG00000090861.11	AARS	-0.0872904	0.762243	0.982826	8.38258
ENSG00000090863.7	GLG1	0.0948014	0.644916	0.966295	6.9369
ENSG00000090889.10	KIF4A	-0.467528	0.391134	0.900765	5.83787
ENSG00000090905.13	TNRC6A	0.249875	0.197879	0.773459	6.60984
ENSG00000090920.9	FCGBP	0.95852	0.10902	0.647429	2.18489
ENSG00000090924.10	PLEKHG2	-0.241895	0.570614	0.955988	4.47986
ENSG00000090932.6	DLL3	-0.411403	0.426942	0.914694	0.583352
ENSG00000090971.4	NAT14	0.0871772	0.728948	0.981983	3.89477
ENSG00000090975.8	PITPNM2	-0.178387	0.505446	0.939532	4.61253
ENSG00000090989.13	EXOC1	0.124179	0.496778	0.938549	5.68573
ENSG00000091009.6	RBM27	0.190089	0.287076	0.844631	6.68015
ENSG00000091039.12	OSBPL8	-0.357139	0.319372	0.867318	8.73252
ENSG00000091073.15	DTX2	0.882501	0.0206929	0.342061	2.02366
ENSG00000091106.14	NLRC4	0.439209	0.29139	0.848772	0.361013
ENSG00000091127.9	PUS7	0.322058	0.206332	0.783042	6.5486
ENSG00000091128.8	LAMB4	-0.213619	0.698532	0.975521	-0.390628
ENSG00000091129.15	NRCAM	-0.0308332	0.935008	0.996397	2.94122
ENSG00000091136.9	LAMB1	0.288745	0.283211	0.841562	5.51298
ENSG00000091137.7	SLC26A4	1.31795	0.0183284	0.327942	0.608683
ENSG00000091138.8	SLC26A3	1.53369	0.0202242	0.340335	2.55108
ENSG00000091140.8	DLD	0.414024	0.146679	0.70813	7.37457
ENSG00000091157.9	WDR7	-0.180553	0.457988	0.927876	4.99268
ENSG00000091164.8	TXNL1	-0.181713	0.335603	0.874126	6.44774
ENSG00000091262.10	ABCC6	0.353672	0.350934	0.885605	2.29625
ENSG00000091317.7	CMTM6	0.0436026	0.857808	0.989514	6.69672
ENSG00000091409.10	ITGA6	0.417653	0.223587	0.796031	2.27001
ENSG00000091428.13	RAPGEF4	1.56604	0.0283259	0.382616	-0.438754
ENSG00000091436.12	MLTK	-0.456714	0.148528	0.710313	4.13808
ENSG00000091483.6	FH	-0.0699302	0.794909	0.985106	7.39044
ENSG00000091490.6	SEL1L3	-0.672286	0.0922408	0.60988	5.74848
ENSG00000091513.10	TF	2.17048	0.00109856	0.0950062	0.171269
ENSG00000091527.11	CDV3	-0.194488	0.317195	0.865835	7.35609
ENSG00000091536.12	MYO15A	-0.619837	0.162173	0.726238	1.39412
ENSG00000091542.8	ALKBH5	0.142413	0.46162	0.928362	6.44518
ENSG00000091583.6	APOH	-0.0905175	0.902588	0.993628	0.925124
ENSG00000091592.11	NLRP1	1.18638	0.0153574	0.306565	5.85172
ENSG00000091622.11	PITPNM3	0.287806	0.355692	0.886254	2.95413
ENSG00000091640.3	SPAG7	-0.0705723	0.719128	0.981153	5.85332
ENSG00000091651.4	ORC6	-0.0409942	0.92454	0.99614	5.25034
ENSG00000091656.11	ZFHX4	-0.104384	0.703899	0.976313	3.99161
ENSG00000091664.7	SLC17A6	-1.76979	0.0292273	0.387864	0.460442
ENSG00000091732.11	ZC3HC1	0.362236	0.114158	0.654005	4.67298
ENSG00000091844.3	RGS17	-0.292131	0.440047	0.920969	2.22658
ENSG00000091879.9	ANGPT2	-0.331761	0.566884	0.955078	-0.355192
ENSG00000091947.5	TMEM101	-0.305944	0.196584	0.77335	4.67657
ENSG00000091986.11	CCDC80	0.622386	0.162012	0.725946	0.684588
ENSG00000092010.10	PSME1	-0.670805	0.0284058	0.382616	6.46294
ENSG00000092020.6	PPP2R3C	-0.072554	0.813068	0.986041	4.47677
ENSG00000092036.12	HAUS4	-0.470109	0.0746417	0.573816	3.9822
ENSG00000092051.12	JPH4	-0.401015	0.555365	0.951903	-0.923933
ENSG00000092068.14	SLC7A8	0.297176	0.503719	0.939532	4.36702
ENSG00000092094.6	OSGEP	-0.324095	0.158366	0.722416	5.16594
ENSG00000092096.10	SLC22A17	-0.0154106	0.968509	0.998451	2.2543
ENSG00000092098.12	RNF31	0.0493321	0.800613	0.985122	4.84228
ENSG00000092108.16	SCFD1	0.0582391	0.779406	0.983599	5.98202
ENSG00000092140.10	G2E3	-0.323595	0.309985	0.861587	4.82646
ENSG00000092148.8	HECTD1	-0.0819021	0.629001	0.964342	7.86836
ENSG00000092199.13	HNRNPC	0.116587	0.521973	0.943238	8.56272
ENSG00000092200.8	RPGRIP1	-0.163366	0.670237	0.970407	0.690458
ENSG00000092201.5	SUPT16H	0.108852	0.587307	0.958846	8.27403
ENSG00000092203.9	TOX4	-0.00669169	0.969808	0.998451	6.23594
ENSG00000092208.12	GEMIN2	-0.0522468	0.8645	0.990279	4.12767
ENSG00000092295.7	TGM1	0.600315	0.0791532	0.583076	2.4891
ENSG00000092330.11	TINF2	-0.143357	0.509714	0.941233	5.21059
ENSG00000092377.9	TBL1Y	-0.0350267	0.953105	0.99802	-0.407853
ENSG00000092421.12	SEMA6A	0.262202	0.372641	0.89313	8.94865
ENSG00000092439.9	TRPM7	0.117131	0.624262	0.96347	6.67296
ENSG00000092445.7	TYRO3	0.439548	0.0838847	0.591017	5.35667
ENSG00000092470.7	WDR76	-0.329071	0.496134	0.938218	5.32111
ENSG00000092531.5	SNAP23	0.686461	0.00797586	0.238691	4.73438
ENSG00000092607.9	TBX15	1.32847	0.0519743	0.502427	0.083456
ENSG00000092621.7	PHGDH	-0.0516362	0.933964	0.996397	7.45244
ENSG00000092758.11	COL9A3	0.408267	0.558773	0.952634	4.26444
ENSG00000092820.13	EZR	-0.176562	0.556398	0.952134	7.49343
ENSG00000092841.14	MYL6	0.128646	0.601104	0.960541	9.11893
ENSG00000092847.6	AGO1	0.0845386	0.693426	0.974926	7.14635
ENSG00000092850.7	TEKT2	1.27673	0.0524026	0.503397	-0.791345
ENSG00000092853.9	CLSPN	-0.231919	0.685452	0.973047	5.6435
ENSG00000092871.12	RFFL	0.31954	0.174687	0.742729	4.0742
ENSG00000092929.7	UNC13D	0.287548	0.602639	0.960646	1.36083
ENSG00000092931.7	MFSD11	0.0867868	0.734406	0.981983	4.50879
ENSG00000092964.12	DPYSL2	-0.0512712	0.894799	0.993024	7.43137
ENSG00000092969.7	TGFB2	1.16029	0.0654734	0.547716	1.51342
ENSG00000092978.6	GPATCH2	-0.0962128	0.600628	0.960541	5.54858
ENSG00000093000.14	NUP50	0.0238116	0.903635	0.993717	6.82921
ENSG00000093009.5	CDC45	-0.115371	0.826096	0.988374	5.99546
ENSG00000093010.7	COMT	0.049017	0.827945	0.988374	7.3595
ENSG00000093072.11	CECR1	-1.19436	0.0246988	0.365771	6.42866
ENSG00000093100.13	XXbac-B461K10.4	0.732904	0.265846	0.829954	-0.741282
ENSG00000093144.14	ECHDC1	-0.00505036	0.977404	0.99892	4.73519
ENSG00000093167.13	LRRFIP2	-0.135031	0.457892	0.927876	5.6902
ENSG00000093183.9	SEC22C	-0.194102	0.33737	0.874863	6.23413
ENSG00000093217.5	XYLB	-0.223799	0.342685	0.879611	4.39174
ENSG00000094631.14	HDAC6	-0.249985	0.211696	0.787421	5.61881
ENSG00000094804.5	CDC6	-0.244201	0.645334	0.966295	6.27346
ENSG00000094841.9	UPRT	-0.114	0.576872	0.95722	3.76882
ENSG00000094880.6	CDC23	0.0750667	0.70003	0.97602	6.09924
ENSG00000094914.8	AAAS	-0.181177	0.390231	0.900765	6.35757
ENSG00000094916.9	CBX5	-0.0195507	0.941073	0.997046	9.52207
ENSG00000094975.9	SUCO	0.162729	0.427931	0.914694	6.71471
ENSG00000095002.8	MSH2	-0.248677	0.412183	0.907682	5.89158
ENSG00000095015.5	MAP3K1	0.150182	0.514242	0.941776	4.73729
ENSG00000095059.11	DHPS	-0.0397293	0.831051	0.988374	6.21898
ENSG00000095066.7	HOOK2	-0.0290574	0.903663	0.993717	6.08027
ENSG00000095139.9	ARCN1	0.0429468	0.831654	0.988374	7.85287
ENSG00000095203.10	EPB41L4B	-0.154536	0.513983	0.941776	5.68886
ENSG00000095209.7	TMEM38B	0.112319	0.647243	0.966327	6.00043
ENSG00000095261.9	PSMD5	0.103533	0.602046	0.960612	5.85345
ENSG00000095303.10	PTGS1	0.331079	0.58892	0.958962	-0.525062
ENSG00000095319.10	NUP188	0.091401	0.733524	0.981983	7.75008
ENSG00000095321.12	CRAT	-0.131771	0.522223	0.943238	6.45915
ENSG00000095370.15	SH2D3C	0.540789	0.46271	0.92849	-0.0284197
ENSG00000095380.10	NANS	-0.203976	0.417696	0.910443	5.24726
ENSG00000095383.15	TBC1D2	-0.651679	0.0631332	0.541583	2.56807
ENSG00000095397.9	DFNB31	0.73563	0.148892	0.710313	3.17709
ENSG00000095464.9	PDE6C	0.467389	0.361011	0.888489	0.0271847
ENSG00000095485.12	CWF19L1	0.0105103	0.963447	0.998198	4.56617
ENSG00000095539.11	SEMA4G	-0.323802	0.400112	0.904534	4.75163
ENSG00000095564.9	BTAF1	0.17781	0.342032	0.878832	6.73474
ENSG00000095574.7	IKZF5	-0.43873	0.0734848	0.570636	4.95604
ENSG00000095585.12	BLNK	0.25026	0.526571	0.943594	2.7726
ENSG00000095587.8	TLL2	0.376749	0.504853	0.939532	1.03995
ENSG00000095637.16	SORBS1	-1.32764	0.0112319	0.270461	4.25075
ENSG00000095739.7	BAMBI	-4.47298	9.06939e-08	0.000329343	3.63494
ENSG00000095752.2	IL11	0.0299211	0.957575	0.99802	1.4054
ENSG00000095787.17	WAC	0.0401599	0.823957	0.988174	7.72672
ENSG00000095794.15	CREM	-0.0106246	0.970471	0.998451	3.8809
ENSG00000095906.12	NUBP2	-0.130064	0.529286	0.944791	5.89528
ENSG00000095932.5	C19orf77	1.58299	0.00117164	0.0961489	2.20863
ENSG00000095951.12	HIVEP1	0.55412	0.315519	0.865288	5.43193
ENSG00000096006.7	CRISP3	0.0283879	0.961583	0.99802	1.34646
ENSG00000096060.10	FKBP5	0.253002	0.566565	0.955078	9.35309
ENSG00000096063.10	SRPK1	0.251536	0.139165	0.69586	7.19389
ENSG00000096070.15	BRPF3	-0.107426	0.606865	0.961553	6.59487
ENSG00000096080.7	MRPS18A	0.445395	0.0958872	0.61825	3.80468
ENSG00000096088.12	PGC	1.92223	0.0337656	0.412663	0.950518
ENSG00000096092.5	TMEM14A	-0.582998	0.033443	0.412251	4.68285
ENSG00000096093.10	EFHC1	0.142377	0.562534	0.954713	5.40532
ENSG00000096384.15	HSP90AB1	0.127803	0.602677	0.960646	10.4178
ENSG00000096401.7	CDC5L	-0.0441876	0.822571	0.987859	7.00205
ENSG00000096433.6	ITPR3	0.159194	0.520336	0.943238	6.89801
ENSG00000096654.11	ZNF184	-0.0536033	0.833142	0.988374	3.95151
ENSG00000096696.9	DSP	0.556646	0.0308993	0.396919	7.68641
ENSG00000096717.7	SIRT1	-0.174613	0.472873	0.930458	5.4772
ENSG00000096746.13	HNRNPH3	-0.13422	0.465202	0.928868	7.6994
ENSG00000096872.11	IFT74	-0.146787	0.539894	0.948063	5.28479
ENSG00000096968.8	JAK2	-0.193581	0.39658	0.902807	4.48219
ENSG00000097007.13	ABL1	-0.266081	0.188587	0.762973	6.81669
ENSG00000097021.15	ACOT7	-0.455768	0.253006	0.817138	5.3014
ENSG00000097033.10	SH3GLB1	-0.164319	0.501034	0.939532	6.27345
ENSG00000097046.8	CDC7	-0.439023	0.240103	0.80756	5.01552
ENSG00000097096.8	SYDE2	0.498093	0.111302	0.650375	3.77292
ENSG00000099194.5	SCD	-0.97904	0.129399	0.679117	8.92636
ENSG00000099203.2	TMED1	-0.310604	0.200357	0.776455	2.74225
ENSG00000099204.14	ABLIM1	0.0825074	0.691571	0.974902	7.60286
ENSG00000099219.9	ERMP1	0.0529951	0.789194	0.984778	5.96449
ENSG00000099246.12	RAB18	0.0123359	0.952907	0.99802	6.81334
ENSG00000099250.13	NRP1	1.04327	0.00809564	0.240213	4.61202
ENSG00000099251.10	HSD17B7P2	-0.464613	0.29755	0.854245	1.54816
ENSG00000099256.14	PRTFDC1	0.730946	0.205873	0.781961	2.68822
ENSG00000099260.6	PALMD	0.72114	0.0885999	0.602346	3.30788
ENSG00000099282.5	TSPAN15	0.194993	0.669289	0.970407	4.62153
ENSG00000099284.9	H2AFY2	0.057265	0.828453	0.988374	5.46029
ENSG00000099290.11	FAM21A	0.259647	0.385284	0.898633	2.35438
ENSG00000099308.6	MAST3	0.141592	0.538297	0.947308	4.62176
ENSG00000099326.4	MZF1	-0.133897	0.611052	0.961781	5.5513
ENSG00000099330.4	OCEL1	0.0261016	0.914899	0.995541	3.42492
ENSG00000099331.9	MYO9B	0.04518	0.827715	0.988374	6.33038
ENSG00000099337.3	KCNK6	-0.102626	0.834572	0.988374	0.369978
ENSG00000099338.18	CATSPERG	0.0459966	0.930194	0.996397	2.2566
ENSG00000099341.7	PSMD8	0.104133	0.768262	0.983598	7.55619
ENSG00000099364.12	FBXL19	0.133228	0.567608	0.955078	4.87616
ENSG00000099365.5	STX1B	1.26315	0.155926	0.718682	-0.266698
ENSG00000099377.9	HSD3B7	-0.0333321	0.899314	0.993512	4.95191
ENSG00000099381.12	SETD1A	-0.0827782	0.651584	0.967489	6.25733
ENSG00000099385.7	BCL7C	-0.0819006	0.75042	0.982005	5.21901
ENSG00000099617.2	EFNA2	0.0877612	0.8733	0.990783	2.1998
ENSG00000099622.9	CIRBP	-0.251043	0.278285	0.839109	7.68347
ENSG00000099624.3	ATP5D	0.0641381	0.758201	0.982554	7.22374
ENSG00000099625.8	C19orf26	0.757365	0.0207665	0.342061	4.35231
ENSG00000099715.10	PCDH11Y	-1.10516	0.0326455	0.407548	-0.0595584
ENSG00000099725.10	PRKY	-0.526739	0.156732	0.71937	3.94366
ENSG00000099769.5	IGFALS	0.0512857	0.898302	0.993024	0.576861
ENSG00000099783.7	HNRNPM	-0.130972	0.569538	0.955709	8.79306
ENSG00000099785.6	2018-03-02	-0.0832484	0.80373	0.985122	4.45324
ENSG00000099795.2	NDUFB7	0.186258	0.40584	0.906047	5.96637
ENSG00000099797.7	TECR	-0.0861506	0.771883	0.983599	5.58849
ENSG00000099800.3	TIMM13	-0.0216595	0.92765	0.996397	5.8893
ENSG00000099804.4	CDC34	0.259421	0.207319	0.783232	5.62736
ENSG00000099810.14	MTAP	-0.106518	0.623795	0.963321	5.83755
ENSG00000099812.6	MISP	1.06112	0.0499942	0.491323	3.92564
ENSG00000099814.11	CEP170B	0.00202844	0.991897	0.999585	7.67642
ENSG00000099817.7	POLR2E	-0.119681	0.570432	0.955901	7.00754
ENSG00000099821.9	POLRMT	0.114465	0.54254	0.948669	6.03853
ENSG00000099822.2	HCN2	0.0496064	0.841466	0.98923	5.10368
ENSG00000099834.14	CDHR5	-0.225515	0.591857	0.959255	3.02535
ENSG00000099840.9	IZUMO4	0.41153	0.340974	0.878135	2.01279
ENSG00000099849.10	RASSF7	-0.0540656	0.80531	0.985122	5.72904
ENSG00000099860.4	GADD45B	-0.184835	0.79021	0.984891	5.09813
ENSG00000099864.13	PALM	0.239524	0.610463	0.961781	4.3613
ENSG00000099866.10	MADCAM1	0.268772	0.568413	0.955502	0.801867
ENSG00000099875.10	MKNK2	0.154952	0.506924	0.939662	7.71777
ENSG00000099889.9	ARVCF	0.109368	0.650894	0.967111	5.83605
ENSG00000099899.10	TRMT2A	0.191507	0.364053	0.888957	5.0256
ENSG00000099901.12	RANBP1	-0.0804323	0.757885	0.982554	7.06796
ENSG00000099904.11	ZDHHC8	0.143126	0.64848	0.966546	5.46028
ENSG00000099910.12	KLHL22	-0.233773	0.260476	0.824455	4.79711
ENSG00000099917.13	MED15	-0.031688	0.869377	0.990279	5.73288
ENSG00000099937.6	SERPIND1	0.0199794	0.976754	0.99892	-0.632027
ENSG00000099940.7	SNAP29	-0.214118	0.236246	0.804335	5.73962
ENSG00000099942.8	CRKL	-0.0650549	0.745319	0.981983	6.87084
ENSG00000099949.14	LZTR1	-0.0372937	0.875426	0.991387	6.27603
ENSG00000099953.5	MMP11	0.159095	0.692154	0.974926	1.89565
ENSG00000099954.14	CECR2	0.487787	0.270177	0.832937	2.20449
ENSG00000099956.13	SMARCB1	0.0410868	0.845586	0.989329	7.1256
ENSG00000099957.12	P2RX6	0.294956	0.503774	0.939532	3.37474
ENSG00000099958.10	DERL3	-1.00997	0.0320273	0.404956	4.78552
ENSG00000099960.8	SLC7A4	0.219937	0.724583	0.981983	-0.428685
ENSG00000099968.13	BCL2L13	0.283506	0.15696	0.719621	6.5722
ENSG00000099974.7	DDTL	0.110052	0.759622	0.982554	1.50293
ENSG00000099991.12	CABIN1	0.152932	0.454096	0.926479	6.78286
ENSG00000099992.11	TBC1D10A	0.0960043	0.735071	0.981983	3.0588
ENSG00000099994.10	SUSD2	0.967008	0.0301231	0.392488	1.19488
ENSG00000099995.14	SF3A1	-0.030006	0.865271	0.990279	7.68974
ENSG00000099999.10	RNF215	-0.240472	0.381964	0.897467	4.12737
ENSG00000100003.13	SEC14L2	-0.249314	0.339776	0.877672	3.48634
ENSG00000100014.15	SPECC1L	0.283659	0.190468	0.763942	5.43505
ENSG00000100023.13	PPIL2	0.162791	0.369118	0.891352	6.30245
ENSG00000100024.10	UPB1	0.868019	0.124642	0.670831	-0.432472
ENSG00000100027.10	YPEL1	0.0827516	0.853522	0.989514	1.58971
ENSG00000100028.7	SNRPD3	0.00496948	0.976745	0.99892	6.94785
ENSG00000100029.13	PES1	0.119522	0.56693	0.955078	6.70013
ENSG00000100030.10	MAPK1	0.00755206	0.967553	0.998451	7.72308
ENSG00000100031.14	GGT1	0.290195	0.415877	0.909658	4.92607
ENSG00000100033.12	PRODH	-0.0518834	0.929533	0.996397	0.739396
ENSG00000100034.9	PPM1F	0.112655	0.608029	0.961781	5.45082
ENSG00000100036.11	SLC35E4	0.197591	0.569893	0.955801	1.3236
ENSG00000100038.15	TOP3B	0.126955	0.626818	0.964301	4.77602
ENSG00000100056.7	DGCR14	-0.039129	0.853777	0.989514	4.58693
ENSG00000100058.8	CRYBB2P1	-0.0890933	0.762799	0.982826	3.57795
ENSG00000100060.13	MFNG	0.280434	0.490805	0.937001	1.15158
ENSG00000100065.10	CARD10	-0.204248	0.583111	0.957951	5.09066
ENSG00000100068.7	LRP5L	0.216967	0.542255	0.948669	2.27757
ENSG00000100075.5	SLC25A1	-0.550481	0.0422923	0.458677	7.39986
ENSG00000100077.10	ADRBK2	0.319371	0.150919	0.712961	4.49298
ENSG00000100078.3	PLA2G3	-0.374959	0.465398	0.928868	6.99421
ENSG00000100083.14	GGA1	-0.0691738	0.696747	0.975205	6.5121
ENSG00000100084.10	HIRA	-0.072383	0.725585	0.981983	4.46727
ENSG00000100092.16	SH3BP1	0.0140358	0.963057	0.998198	4.54934
ENSG00000100097.7	LGALS1	-0.651958	0.341367	0.878594	5.78141
ENSG00000100099.16	HPS4	-0.21022	0.337137	0.874812	5.6591
ENSG00000100100.8	PIK3IP1	-0.107144	0.762563	0.982826	4.28328
ENSG00000100101.13	NOL12	-0.0328788	0.875745	0.991387	4.85312
ENSG00000100104.8	SRRD	-0.0871452	0.668504	0.970407	4.33204
ENSG00000100105.13	PATZ1	0.1513	0.543951	0.948839	5.98835
ENSG00000100106.15	TRIOBP	-0.176764	0.488262	0.936401	4.03059
ENSG00000100109.12	TFIP11	-0.0598727	0.761214	0.982826	4.73788
ENSG00000100116.12	GCAT	0.132024	0.66675	0.970407	5.10796
ENSG00000100124.8	ANKRD54	0.0598667	0.772627	0.983599	5.14923
ENSG00000100129.13	EIF3L	-0.0270093	0.923809	0.996137	8.4777
ENSG00000100138.9	NHP2L1	0.0504594	0.793105	0.985106	6.92107
ENSG00000100139.9	MICALL1	0.239015	0.410695	0.907541	5.68941
ENSG00000100142.10	POLR2F	0.475828	0.0208883	0.342061	5.15635
ENSG00000100147.9	CCDC134	0.17413	0.620601	0.962834	2.42475
ENSG00000100150.12	DEPDC5	-0.0585913	0.822179	0.987744	4.18786
ENSG00000100151.11	PICK1	-0.0313684	0.886667	0.991751	6.05028
ENSG00000100154.10	TTC28	0.103834	0.818221	0.986557	3.95566
ENSG00000100156.6	SLC16A8	0.337635	0.413506	0.908163	4.37485
ENSG00000100162.10	CENPM	-0.12988	0.796176	0.985106	4.63072
ENSG00000100167.15	2018-09-03	0.162017	0.661749	0.970407	5.37348
ENSG00000100170.5	SLC5A1	1.03169	0.122344	0.666646	-0.32003
ENSG00000100181.17	TPTEP1	0.066254	0.736571	0.981983	5.61687
ENSG00000100191.4	SLC5A4	0.00409245	0.992547	0.999585	1.02274
ENSG00000100196.6	KDELR3	-0.302331	0.364596	0.889076	2.80713
ENSG00000100197.16	CYP2D6	0.320085	0.416879	0.909777	2.0212
ENSG00000100201.14	DDX17	0.171703	0.533591	0.946047	9.54128
ENSG00000100206.5	DMC1	-0.547479	0.292011	0.849366	2.04076
ENSG00000100207.14	TCF20	-0.165874	0.407187	0.906161	6.7399
ENSG00000100209.5	HSCB	0.362614	0.13612	0.691054	3.10249
ENSG00000100211.6	CBY1	0.226129	0.247838	0.815533	4.55471
ENSG00000100216.4	TOMM22	0.20927	0.361569	0.888489	6.67819
ENSG00000100218.7	RTDR1	0.421099	0.388144	0.900765	-0.21929
ENSG00000100219.12	XBP1	-0.237345	0.278443	0.839109	7.62132
ENSG00000100220.7	RTCB	0.0305476	0.88357	0.991663	6.37984
ENSG00000100221.6	JOSD1	-0.625384	0.00907702	0.246948	6.16041
ENSG00000100225.13	FBXO7	-0.0587138	0.735194	0.981983	6.68026
ENSG00000100226.11	GTPBP1	-0.157414	0.504645	0.939532	6.20239
ENSG00000100227.13	POLDIP3	-0.097491	0.617748	0.962834	6.67478
ENSG00000100228.8	RAB36	0.387079	0.335049	0.873694	4.55356
ENSG00000100234.11	TIMP3	0.936128	0.240781	0.807809	-0.503646
ENSG00000100239.11	PPP6R2	0.281365	0.231016	0.802926	6.71185
ENSG00000100241.16	SBF1	-0.01081	0.961218	0.99802	7.64076
ENSG00000100242.11	SUN2	-0.118177	0.572832	0.95636	6.3628
ENSG00000100243.16	CYB5R3	0.130883	0.610852	0.961781	6.9837
ENSG00000100246.8	DNAL4	0.174278	0.481899	0.935037	4.77894
ENSG00000100253.8	MIOX	-0.383444	0.491912	0.937001	-0.347361
ENSG00000100258.13	LMF2	-0.359385	0.114195	0.654005	6.7218
ENSG00000100263.9	RHBDD3	-0.127466	0.582412	0.957951	4.95021
ENSG00000100266.13	PACSIN2	-0.164165	0.479144	0.932932	7.04815
ENSG00000100271.12	TTLL1	0.420629	0.252291	0.816775	2.95354
ENSG00000100276.9	RASL10A	-0.388906	0.434542	0.917142	-0.0116227
ENSG00000100280.12	AP1B1	0.176191	0.477969	0.932451	7.52922
ENSG00000100281.9	HMGXB4	-0.000405617	0.998375	0.999758	6.32689
ENSG00000100284.16	TOM1	0.0779824	0.777657	0.983599	4.83095
ENSG00000100285.9	NEFH	-0.0405932	0.95921	0.99802	6.49246
ENSG00000100288.15	CHKB	0.224628	0.531884	0.945293	1.82517
ENSG00000100290.2	BIK	-0.0685109	0.790721	0.984973	2.90248
ENSG00000100292.12	HMOX1	1.36266	0.188054	0.762222	4.74514
ENSG00000100294.8	MCAT	0.186081	0.371702	0.892461	4.66579
ENSG00000100296.9	THOC5	0.0897025	0.630305	0.964354	5.59399
ENSG00000100297.11	MCM5	-0.343168	0.418863	0.910821	7.14502
ENSG00000100298.11	APOBEC3H	0.222764	0.787308	0.984074	-0.988835
ENSG00000100299.13	ARSA	-0.0558433	0.829081	0.988374	5.70772
ENSG00000100300.13	TSPO	-0.130857	0.607406	0.961685	6.20834
ENSG00000100302.6	RASD2	-0.0186139	0.969009	0.998451	0.0132798
ENSG00000100304.12	TTLL12	0.102431	0.673966	0.970628	6.72469
ENSG00000100307.8	CBX7	0.0179667	0.942484	0.99729	5.67256
ENSG00000100311.12	PDGFB	0.0547625	0.839756	0.988478	4.17422
[truncated: 17,963 more rows]

## Sheet: del Site3 DEG
ensembl	symbol	logFC	PValue	FDR	logCPM
ENSG00000000003.10	TSPAN6	0.0130395	0.974028	0.999924	2.76902
ENSG00000000419.8	DPM1	-0.167022	0.467178	0.999924	5.61459
ENSG00000000457.9	SCYL3	0.0847248	0.758657	0.999924	4.60292
ENSG00000000460.12	C1orf112	-0.476259	0.331153	0.999924	4.3513
ENSG00000000971.11	CFH	-0.328146	0.66348	0.999924	-0.507007
ENSG00000001036.9	FUCA2	-0.153621	0.628031	0.999924	6.0263
ENSG00000001084.6	GCLC	-0.292794	0.538961	0.999924	7.25358
ENSG00000001167.10	NFYA	-0.0849991	0.757837	0.999924	6.48111
ENSG00000001460.13	STPG1	0.273917	0.323463	0.999924	3.82003
ENSG00000001461.12	NIPAL3	-0.00486391	0.981673	0.999924	6.97476
ENSG00000001497.12	LAS1L	-0.0875776	0.717155	0.999924	5.94023
ENSG00000001561.6	ENPP4	-0.240875	0.440199	0.999924	5.41383
ENSG00000001617.7	SEMA3F	-0.0218782	0.973164	0.999924	3.6283
ENSG00000001626.10	CFTR	1.60943	0.0950429	0.93462	-0.291753
ENSG00000001629.5	ANKIB1	0.118481	0.651154	0.999924	7.34702
ENSG00000001630.11	CYP51A1	-0.0854481	0.849286	0.999924	3.71094
ENSG00000001631.10	KRIT1	0.0419749	0.887465	0.999924	5.62172
ENSG00000002016.12	RAD52	0.228814	0.399273	0.999924	4.49163
ENSG00000002079.8	MYH16	0.620205	0.277546	0.999924	1.07261
ENSG00000002330.9	BAD	-0.276221	0.350959	0.999924	5.21302
ENSG00000002549.8	LAP3	-0.211945	0.345983	0.999924	5.59953
ENSG00000002586.13	CD99	0.273593	0.512526	0.999924	4.99006
ENSG00000002587.5	HS3ST1	-0.33174	0.586546	0.999924	-0.128719
ENSG00000002726.15	AOC1	-0.549915	0.478847	0.999924	0.110548
ENSG00000002745.8	WNT16	-0.142921	0.858553	0.999924	0.200919
ENSG00000002746.10	HECW1	-0.244225	0.733714	0.999924	-0.758648
ENSG00000002822.11	MAD1L1	-0.0606062	0.8114	0.999924	5.3305
ENSG00000002834.13	LASP1	-0.0506767	0.854754	0.999924	8.00236
ENSG00000002919.10	SNX11	-0.21998	0.454091	0.999924	4.02594
ENSG00000003056.3	M6PR	-0.101763	0.731142	0.999924	6.33531
ENSG00000003096.9	KLHL13	0.737242	0.13872	0.989632	2.84848
ENSG00000003137.4	CYP26B1	0.87381	0.254055	0.999924	-0.495323
ENSG00000003147.13	ICA1	0.154463	0.670881	0.999924	5.90339
ENSG00000003249.9	DBNDD1	0.466518	0.084586	0.926195	5.22482
ENSG00000003393.10	ALS2	-0.0803497	0.734645	0.999924	4.9771
ENSG00000003400.10	CASP10	0.169168	0.757261	0.999924	0.245331
ENSG00000003402.15	CFLAR	0.0650395	0.813399	0.999924	6.14369
ENSG00000003436.10	TFPI	0.342306	0.639926	0.999924	5.38203
ENSG00000003509.11	NDUFAF7	0.133161	0.59633	0.999924	3.7931
ENSG00000003756.12	RBM5	0.572752	0.0828545	0.922958	6.60547
ENSG00000003987.9	MTMR7	0.0245171	0.943866	0.999924	2.36539
ENSG00000003989.12	SLC7A2	0.938635	0.0943609	0.933181	5.78596
ENSG00000004059.6	ARF5	0.319131	0.267809	0.999924	7.21349
ENSG00000004139.9	SARM1	0.251284	0.297972	0.999924	5.37391
ENSG00000004142.7	POLDIP2	-0.04996	0.829562	0.999924	7.18052
ENSG00000004399.8	PLXND1	0.135965	0.812863	0.999924	4.70857
ENSG00000004455.12	AK2	0.106389	0.613466	0.999924	7.02906
ENSG00000004468.8	CD38	0.659063	0.351649	0.999924	-0.310384
ENSG00000004478.5	FKBP4	0.0159871	0.9576	0.999924	8.56925
ENSG00000004487.11	KDM1A	0.218311	0.384125	0.999924	6.64421
ENSG00000004534.10	RBM6	0.216579	0.262118	0.999924	6.5485
ENSG00000004660.10	CAMKK1	0.643546	0.159648	0.999924	2.96637
ENSG00000004700.11	RECQL	-0.379059	0.310983	0.999924	5.59591
ENSG00000004766.11	CCDC132	0.424161	0.146459	0.999305	5.32923
ENSG00000004776.7	HSPB6	-0.302858	0.741344	0.999924	5.93755
ENSG00000004777.14	ARHGAP33	-0.381417	0.441607	0.999924	5.32813
ENSG00000004779.5	NDUFAB1	-0.00710878	0.983064	0.999924	5.96655
ENSG00000004799.7	PDK4	-0.348705	0.760199	0.999924	5.47097
ENSG00000004809.9	SLC22A16	2.30237	0.00274584	0.399379	0.612664
ENSG00000004838.9	ZMYND10	-0.330728	0.581228	0.999924	1.50354
ENSG00000004848.6	ARX	0.110895	0.814812	0.999924	1.09699
ENSG00000004864.9	SLC25A13	0.293244	0.318059	0.999924	6.34597
ENSG00000004866.14	ST7	0.33473	0.601633	0.999924	5.77389
ENSG00000004897.7	CDC27	-0.0766996	0.78482	0.999924	6.37748
ENSG00000004961.10	HCCS	0.0736987	0.800142	0.999924	4.91242
ENSG00000004975.7	DVL2	-0.246617	0.366608	0.999924	6.35064
ENSG00000005001.5	PRSS22	0.0684321	0.880015	0.999924	1.96868
ENSG00000005007.8	UPF1	0.359823	0.147164	0.999305	6.6679
ENSG00000005020.8	SKAP2	0.0460827	0.847526	0.999924	5.97951
ENSG00000005022.5	SLC25A5	-0.145135	0.631514	0.999924	8.35591
ENSG00000005059.11	CCDC109B	-0.421118	0.288344	0.999924	4.6772
ENSG00000005073.5	HOXA11	0.179191	0.835927	0.999924	0.161608
ENSG00000005075.11	POLR2J	-0.0030324	0.991868	0.999924	5.06048
ENSG00000005100.8	DHX33	-0.00553715	0.98118	0.999924	6.36677
ENSG00000005108.11	THSD7A	0.933034	0.239742	0.999924	-0.058141
ENSG00000005156.7	LIG3	0.0723775	0.718562	0.999924	6.36061
ENSG00000005175.5	RPAP3	0.0445354	0.841405	0.999924	6.26016
ENSG00000005187.7	ACSM3	0.869518	0.0556635	0.855185	4.70987
ENSG00000005189.15	AC004381.6	-0.5517	0.277412	0.999924	5.56809
ENSG00000005194.10	CIAPIN1	-0.144573	0.56031	0.999924	5.72184
ENSG00000005206.12	SPPL2B	0.00614857	0.984477	0.999924	6.01419
ENSG00000005238.15	FAM214B	-0.407775	0.261943	0.999924	5.20746
ENSG00000005243.5	COPZ2	-0.310042	0.476458	0.999924	1.58931
ENSG00000005249.8	PRKAR2B	-0.113935	0.731338	0.999924	5.58518
ENSG00000005302.13	MSL3	-0.0897092	0.744314	0.999924	5.92772
ENSG00000005339.8	CREBBP	0.0511107	0.872535	0.999924	7.12468
ENSG00000005379.11	BZRAP1	-0.0804859	0.830695	0.999924	6.20896
ENSG00000005421.4	PON1	0.0976689	0.755835	0.999924	5.05195
ENSG00000005436.9	GCFC2	-0.266255	0.357667	0.999924	5.79074
ENSG00000005448.12	WDR54	-0.374942	0.197114	0.999924	4.36147
ENSG00000005469.7	CROT	0.456429	0.446074	0.999924	6.67537
ENSG00000005471.11	ABCB4	-0.343742	0.434635	0.999924	0.834228
ENSG00000005483.15	KMT2E	0.314031	0.251517	0.999924	7.51251
ENSG00000005486.12	RHBDD2	-0.0250749	0.93495	0.999924	6.63545
ENSG00000005513.9	SOX8	-0.646795	0.512167	0.999924	-0.864914
ENSG00000005700.10	IBTK	-0.0985557	0.705558	0.999924	6.9485
ENSG00000005801.12	ZNF195	0.0681884	0.790615	0.999924	5.6478
ENSG00000005810.13	MYCBP2	-0.146693	0.570242	0.999924	6.98562
ENSG00000005812.6	FBXL3	-0.185193	0.459121	0.999924	5.36341
ENSG00000005844.13	ITGAL	0.277866	0.551776	0.999924	1.66872
ENSG00000005882.7	PDK2	-0.148611	0.616025	0.999924	4.16123
ENSG00000005884.13	ITGA3	-0.0495675	0.863818	0.999924	4.99163
ENSG00000005889.11	ZFX	-0.0775739	0.758748	0.999924	5.79529
ENSG00000005893.11	LAMP2	0.0830322	0.747115	0.999924	6.55297
ENSG00000005955.8	GGNBP2	-0.104055	0.61408	0.999924	6.65147
ENSG00000005961.13	ITGA2B	-0.631915	0.294603	0.999924	1.45121
ENSG00000006007.7	GDE1	-0.0181821	0.93897	0.999924	6.36227
ENSG00000006015.13	C19orf60	-0.146827	0.5045	0.999924	5.37722
ENSG00000006016.6	CRLF1	-1.58609	0.0274307	0.691377	2.04317
ENSG00000006042.7	TMEM98	0.782568	0.0239576	0.66887	4.4842
ENSG00000006047.8	YBX2	-0.955296	0.287811	0.999924	5.00779
ENSG00000006062.9	MAP3K14	0.0902151	0.771601	0.999924	4.05639
ENSG00000006071.7	ABCC8	-0.390024	0.637411	0.999924	0.483316
ENSG00000006114.11	SYNRG	0.315241	0.163374	0.999924	6.42788
ENSG00000006118.10	TMEM132A	-0.0620711	0.84275	0.999924	6.30108
ENSG00000006125.12	AP2B1	0.118783	0.63298	0.999924	8.45208
ENSG00000006194.6	ZNF263	-0.249188	0.394691	0.999924	5.6618
ENSG00000006210.6	CX3CL1	0.603637	0.266972	0.999924	4.72811
ENSG00000006282.15	SPATA20	0.0120338	0.971643	0.999924	7.78572
ENSG00000006283.13	CACNA1G	-0.194697	0.805324	0.999924	1.52136
ENSG00000006327.9	TNFRSF12A	-0.965594	0.0754529	0.901675	3.4371
ENSG00000006432.11	MAP3K9	0.0711739	0.76375	0.999924	5.59656
ENSG00000006451.3	RALA	0.426951	0.143733	0.998736	6.2409
ENSG00000006453.9	BAIAP2L1	0.0939088	0.716221	0.999924	5.84187
ENSG00000006459.6	JHDM1D	0.633915	0.138441	0.989632	5.85232
ENSG00000006468.9	ETV1	0.590887	0.416059	0.999924	4.17856
ENSG00000006530.11	AGK	0.491289	0.0588361	0.863497	6.04343
ENSG00000006534.11	ALDH3B1	0.232573	0.511298	0.999924	2.60926
ENSG00000006576.12	PHTF2	-0.248753	0.536145	0.999924	7.00153
ENSG00000006607.9	FARP2	0.201013	0.384646	0.999924	5.57728
ENSG00000006611.11	USH1C	1.47668	0.0373285	0.756498	1.82463
ENSG00000006625.13	GGCT	-0.067946	0.834835	0.999924	6.72502
ENSG00000006634.3	DBF4	-0.369926	0.384869	0.999924	5.41239
ENSG00000006638.7	TBXA2R	-0.212666	0.72138	0.999924	1.71592
ENSG00000006652.9	IFRD1	0.254138	0.537262	0.999924	6.54952
ENSG00000006695.6	COX10	-0.0533883	0.843436	0.999924	4.22043
ENSG00000006704.6	GTF2IRD1	0.503152	0.190011	0.999924	5.10248
ENSG00000006712.10	PAF1	-0.129471	0.618263	0.999924	6.6264
ENSG00000006715.11	VPS41	0.330311	0.263536	0.999924	6.82881
ENSG00000006740.12	ARHGAP44	-0.420809	0.547128	0.999924	2.84764
ENSG00000006744.14	ELAC2	0.0522599	0.851941	0.999924	6.66936
ENSG00000006747.10	SCIN	-2.11678	0.0205088	0.638038	6.41116
ENSG00000006756.11	ARSD	0.329989	0.158469	0.999924	5.39202
ENSG00000006757.7	PNPLA4	-0.0332529	0.89104	0.999924	4.37653
ENSG00000006831.9	ADIPOR2	-0.0967594	0.696725	0.999924	6.80617
ENSG00000006837.7	CDKL3	1.0135	0.0574771	0.861263	0.826225
ENSG00000007038.6	PRSS21	-0.0754738	0.906981	0.999924	4.16217
ENSG00000007047.10	MARK4	0.283932	0.351059	0.999924	5.20976
ENSG00000007080.6	CCDC124	-0.0915865	0.722912	0.999924	6.60888
ENSG00000007168.8	PAFAH1B1	0.204913	0.404579	0.999924	7.30922
ENSG00000007202.10	KIAA0100	0.0512239	0.810297	0.999924	8.12812
ENSG00000007255.6	TRAPPC6A	0.128682	0.617299	0.999924	4.89518
ENSG00000007264.9	MATK	0.134968	0.572093	0.999924	5.85612
ENSG00000007341.14	ST7L	-0.100744	0.696268	0.999924	3.95754
ENSG00000007350.12	TKTL1	0.299028	0.657071	0.999924	-0.284941
ENSG00000007372.16	PAX6	-0.913272	0.0917266	0.931586	3.50478
ENSG00000007376.3	RPUSD1	-0.0506366	0.848933	0.999924	5.33873
ENSG00000007384.11	RHBDF1	0.0242816	0.932844	0.999924	5.56978
ENSG00000007392.12	LUC7L	0.236252	0.422234	0.999924	6.21321
ENSG00000007402.7	CACNA2D2	0.197349	0.454042	0.999924	4.54547
ENSG00000007516.9	BAIAP3	0.0761495	0.868281	0.999924	3.86343
ENSG00000007520.3	TSR3	0.0720984	0.789507	0.999924	5.34616
ENSG00000007541.10	PIGQ	-0.0104496	0.970297	0.999924	6.00077
ENSG00000007545.11	CRAMP1L	0.085053	0.748704	0.999924	4.95085
ENSG00000007866.14	TEAD3	0.263431	0.494759	0.999924	3.95101
ENSG00000007923.11	DNAJC11	0.0208958	0.921436	0.999924	5.94772
ENSG00000007944.10	MYLIP	-1.25714	0.00442703	0.411698	4.2286
ENSG00000007952.13	NOX1	0.140992	0.795812	0.999924	0.0143754
ENSG00000007968.6	E2F2	-0.700362	0.329749	0.999924	6.20936
ENSG00000008018.8	PSMB1	0.0145062	0.955051	0.999924	6.75585
ENSG00000008056.8	SYN1	0.634086	0.147522	0.999305	3.88003
ENSG00000008083.9	JARID2	0.328627	0.308446	0.999924	4.92319
ENSG00000008086.6	CDKL5	-0.260406	0.546395	0.999924	1.47254
ENSG00000008128.18	CDK11A	0.0773646	0.881044	0.999924	0.757879
ENSG00000008130.11	NADK	0.205719	0.413572	0.999924	6.33337
ENSG00000008196.8	TFAP2B	1.34479	0.0869215	0.931362	-0.783403
ENSG00000008197.4	TFAP2D	-0.38969	0.475681	0.999924	-0.202168
ENSG00000008226.15	DLEC1	-0.128705	0.826693	0.999924	-0.199103
ENSG00000008256.11	CYTH3	-0.21392	0.51797	0.999924	6.30917
ENSG00000008277.10	ADAM22	-0.0112124	0.972166	0.999924	5.6859
ENSG00000008282.3	SYPL1	-0.403037	0.175977	0.999924	5.74852
ENSG00000008283.11	CYB561	-0.00725467	0.975172	0.999924	7.32279
ENSG00000008294.16	SPAG9	-0.00769535	0.971852	0.999924	7.22183
ENSG00000008300.10	CELSR3	0.0283369	0.919923	0.999924	7.79218
ENSG00000008311.10	AASS	0.892777	0.0114665	0.543972	4.32226
ENSG00000008323.11	PLEKHG6	-0.518801	0.150123	0.999924	3.94576
ENSG00000008324.6	SS18L2	-0.0544616	0.865788	0.999924	4.19501
ENSG00000008382.11	MPND	0.0753907	0.820556	0.999924	3.67394
ENSG00000008394.8	MGST1	0.0434217	0.916667	0.999924	6.88901
ENSG00000008405.7	CRY1	-0.192754	0.544364	0.999924	5.06588
ENSG00000008441.12	NFIX	0.491802	0.0774156	0.907175	9.89642
ENSG00000008513.10	ST3GAL1	1.02513	0.0393279	0.767413	7.48998
ENSG00000008516.12	MMP25	0.906526	0.0817693	0.918559	1.43999
ENSG00000008710.13	PKD1	0.0920556	0.804359	0.999924	6.65813
ENSG00000008735.10	MAPK8IP2	0.0903133	0.707952	0.999924	7.93982
ENSG00000008838.13	MED24	0.0603463	0.791082	0.999924	6.50564
ENSG00000008853.12	RHOBTB2	0.210971	0.388978	0.999924	4.85742
ENSG00000008869.7	HEATR5B	-0.0867137	0.700892	0.999924	6.09152
ENSG00000008952.12	SEC62	0.214317	0.292109	0.999924	7.19884
ENSG00000008988.5	RPS20	0.538605	0.0252173	0.672081	8.05673
ENSG00000009307.11	CSDE1	0.218325	0.294677	0.999924	9.37529
ENSG00000009335.13	UBE3C	-0.0455957	0.834092	0.999924	7.61117
ENSG00000009413.11	REV3L	-0.158148	0.619913	0.999924	6.20495
ENSG00000009694.9	TENM1	0.17954	0.737453	0.999924	5.5906
ENSG00000009724.12	MASP2	0.264772	0.549843	0.999924	2.0872
ENSG00000009780.11	FAM76A	-0.079602	0.773925	0.999924	4.06695
ENSG00000009790.10	TRAF3IP3	0.0644461	0.85656	0.999924	1.84347
ENSG00000009830.7	POMT2	-0.0212492	0.924725	0.999924	5.28154
ENSG00000009844.11	VTA1	-0.0917001	0.731107	0.999924	6.33747
ENSG00000009950.11	MLXIPL	-0.152806	0.844005	0.999924	3.53452
ENSG00000009954.6	BAZ1B	0.0684075	0.777028	0.999924	8.25295
ENSG00000010017.9	RANBP9	-0.190453	0.422908	0.999924	6.22227
ENSG00000010030.9	ETV7	-0.505981	0.422333	0.999924	1.23765
ENSG00000010072.11	SPRTN	-0.374492	0.13662	0.985844	5.20958
ENSG00000010165.15	METTL13	-0.0169225	0.949873	0.999924	6.11714
ENSG00000010219.9	DYRK4	0.0656832	0.814023	0.999924	3.93736
ENSG00000010244.12	ZNF207	0.0928002	0.651743	0.999924	7.60991
ENSG00000010256.6	UQCRC1	-0.0843192	0.729305	0.999924	7.87523
ENSG00000010270.9	STARD3NL	-0.256829	0.402172	0.999924	6.96285
ENSG00000010278.7	CD9	0.792066	0.0603254	0.864889	7.10941
ENSG00000010292.8	NCAPD2	-0.222703	0.656145	0.999924	7.99748
ENSG00000010295.15	IFFO1	-0.146994	0.784086	0.999924	3.54719
ENSG00000010310.4	GIPR	0.429705	0.43928	0.999924	1.078
ENSG00000010318.15	PHF7	0.257161	0.418817	0.999924	2.96929
ENSG00000010319.2	SEMA3G	0.738678	0.161723	0.999924	1.98655
ENSG00000010322.11	NISCH	0.166677	0.478948	0.999924	6.75855
ENSG00000010327.6	STAB1	-0.582869	0.299505	0.999924	-0.279528
ENSG00000010361.9	FUZ	-0.219948	0.521609	0.999924	3.20877
ENSG00000010379.11	SLC6A13	0.454814	0.586615	0.999924	-1.08238
ENSG00000010404.13	IDS	-0.132293	0.737143	0.999924	5.6541
ENSG00000010438.12	PRSS3	0.548242	0.598006	0.999924	0.485121
ENSG00000010539.7	ZNF200	-0.0068196	0.981662	0.999924	4.13141
ENSG00000010610.5	CD4	0.243203	0.640847	0.999924	1.45269
ENSG00000010626.10	LRRC23	0.125549	0.740931	0.999924	3.37714
ENSG00000010704.14	HFE	0.736398	0.384203	0.999924	-0.432614
ENSG00000010803.12	SCMH1	0.00134479	0.994945	0.999924	6.0938
ENSG00000010810.13	FYN	0.0296356	0.962861	0.999924	3.15029
ENSG00000010818.4	HIVEP2	0.32708	0.557159	0.999924	6.2933
ENSG00000010932.11	FMO1	-0.147322	0.828386	0.999924	1.0448
ENSG00000011007.8	TCEB3	-0.322803	0.176184	0.999924	6.96866
ENSG00000011009.6	LYPLA2	0.311908	0.270898	0.999924	5.31175
ENSG00000011021.17	CLCN6	-0.290204	0.414973	0.999924	4.65296
ENSG00000011028.9	MRC2	1.4457	0.0301269	0.70516	2.30722
ENSG00000011105.7	TSPAN9	0.753509	0.158436	0.999924	1.22489
ENSG00000011114.10	BTBD7	-0.0468039	0.822881	0.999924	6.07455
ENSG00000011132.7	APBA3	0.147833	0.598933	0.999924	4.13024
ENSG00000011143.12	MKS1	0.100964	0.692691	0.999924	4.3102
ENSG00000011198.3	ABHD5	-0.186223	0.618722	0.999924	4.51936
ENSG00000011201.6	KAL1	0.823511	0.040823	0.782412	3.61551
ENSG00000011243.13	AKAP8L	-0.0156038	0.954182	0.999924	6.11967
ENSG00000011258.11	MBTD1	0.289486	0.277026	0.999924	5.54146
ENSG00000011260.9	UTP18	-0.323484	0.226709	0.999924	5.51527
ENSG00000011275.14	RNF216	0.105437	0.728551	0.999924	6.1115
ENSG00000011295.11	TTC19	0.142701	0.481706	0.999924	6.60257
ENSG00000011304.12	PTBP1	-0.167667	0.498062	0.999924	8.74534
ENSG00000011332.15	DPF1	-0.683599	0.323288	0.999924	1.35604
ENSG00000011347.5	SYT7	0.296699	0.357594	0.999924	6.78358
ENSG00000011376.5	LARS2	0.0754437	0.743047	0.999924	6.07109
ENSG00000011405.9	PIK3C2A	-0.020421	0.943367	0.999924	6.97034
ENSG00000011422.7	PLAUR	-0.095114	0.856727	0.999924	2.48317
ENSG00000011426.6	ANLN	-0.618211	0.385674	0.999924	7.40757
ENSG00000011451.13	WIZ	0.134825	0.515733	0.999924	6.70436
ENSG00000011454.12	RABGAP1	0.114656	0.621088	0.999924	6.2808
ENSG00000011465.12	DCN	1.39599	0.10808	0.948218	1.39719
ENSG00000011478.7	QPCTL	-0.660462	0.0614951	0.866648	3.77812
ENSG00000011485.10	PPP5C	-0.0685408	0.739456	0.999924	6.5254
ENSG00000011523.9	CEP68	0.133389	0.643393	0.999924	4.56474
ENSG00000011566.10	MAP4K3	-0.0650622	0.742403	0.999924	5.65668
ENSG00000011590.9	ZBTB32	0.630234	0.212949	0.999924	1.07555
ENSG00000011638.6	TMEM159	0.000722576	0.998149	0.999924	3.04108
ENSG00000011677.8	GABRA3	-0.0481204	0.898063	0.999924	3.18873
ENSG00000012048.15	BRCA1	-0.345387	0.520695	0.999924	6.86347
ENSG00000012061.11	ERCC1	0.344716	0.236168	0.999924	4.98669
ENSG00000012171.13	SEMA3B	0.272802	0.524568	0.999924	4.74748
ENSG00000012174.7	MBTPS2	-0.264768	0.296419	0.999924	5.72658
ENSG00000012211.8	PRICKLE3	-0.137843	0.618728	0.999924	4.40026
ENSG00000012232.4	EXTL3	-0.017697	0.937388	0.999924	6.48267
ENSG00000012504.9	NR1H4	0.785688	0.170537	0.999924	1.98133
ENSG00000012660.9	ELOVL5	-0.28441	0.372296	0.999924	7.81608
ENSG00000012817.11	KDM5D	-0.185832	0.480524	0.999924	6.20683
ENSG00000012822.11	CALCOCO1	0.325909	0.510397	0.999924	6.08464
ENSG00000012963.9	UBR7	-0.359896	0.221989	0.999924	6.35511
ENSG00000012983.7	MAP4K5	0.059839	0.809055	0.999924	6.20961
ENSG00000013016.10	EHD3	-0.304473	0.569031	0.999924	1.64705
ENSG00000013275.3	PSMC4	-0.431205	0.196608	0.999924	6.68561
ENSG00000013288.4	MAN2B2	0.0205529	0.934153	0.999924	5.90327
ENSG00000013293.5	SLC7A14	0.686751	0.337606	0.999924	-0.281616
ENSG00000013297.6	CLDN11	1.30854	0.0386571	0.763897	5.17685
ENSG00000013306.11	SLC25A39	0.0570636	0.823944	0.999924	8.26666
ENSG00000013364.14	MVP	0.256514	0.353446	0.999924	7.23931
ENSG00000013374.11	NUB1	0.0936443	0.688802	0.999924	6.36964
ENSG00000013375.11	PGM3	-0.0538525	0.833867	0.999924	6.21064
ENSG00000013392.6	RWDD2A	0.0623011	0.869157	0.999924	4.72672
ENSG00000013441.11	CLK1	-0.72284	0.120655	0.964567	6.50162
ENSG00000013503.5	POLR3B	0.0275682	0.909702	0.999924	5.5857
ENSG00000013523.5	ANGEL1	0.00434818	0.990312	0.999924	4.79897
ENSG00000013561.13	RNF14	-0.119762	0.648319	0.999924	6.2632
ENSG00000013563.9	DNASE1L1	0.244536	0.356479	0.999924	4.21799
ENSG00000013573.12	DDX11	-0.370964	0.345017	0.999924	5.74173
ENSG00000013583.4	HEBP1	-0.119155	0.74576	0.999924	4.83028
ENSG00000013588.5	GPRC5A	1.59015	0.051937	0.837527	2.97221
ENSG00000013619.9	MAMLD1	-0.718673	0.153563	0.999924	2.56884
ENSG00000013725.10	CD6	0.173589	0.758872	0.999924	1.37424
ENSG00000013810.14	TACC3	-0.468285	0.440239	0.999924	7.04933
ENSG00000014123.9	UFL1	-0.433839	0.0775643	0.907261	5.74472
ENSG00000014138.4	POLA2	-0.344129	0.408539	0.999924	5.88693
ENSG00000014164.6	ZC3H3	-0.0883898	0.692612	0.999924	5.10995
ENSG00000014216.11	CAPN1	0.070651	0.792421	0.999924	7.06298
ENSG00000014257.11	ACPP	0.740526	0.220744	0.999924	3.74841
ENSG00000014641.13	MDH1	-0.0173603	0.946833	0.999924	7.3531
ENSG00000014824.9	SLC30A9	-0.15401	0.431251	0.999924	7.47728
ENSG00000014914.15	MTMR11	0.629527	0.0569239	0.860279	4.20635
ENSG00000014919.8	COX15	0.0834516	0.691028	0.999924	6.62922
ENSG00000015133.14	CCDC88C	0.411497	0.143797	0.998736	4.64047
ENSG00000015153.10	YAF2	-0.491835	0.0682356	0.878869	4.54026
ENSG00000015171.14	ZMYND11	-0.0423354	0.833985	0.999924	7.31276
ENSG00000015285.6	WAS	-0.206035	0.562973	0.999924	1.64036
ENSG00000015475.14	BID	0.848717	0.0321549	0.707692	3.35262
ENSG00000015479.13	MATR3	0.0255598	0.895934	0.999924	8.66406
ENSG00000015520.10	NPC1L1	0.257509	0.771572	0.999924	1.95197
ENSG00000015532.5	XYLT2	0.00195104	0.994445	0.999924	4.45911
ENSG00000015592.12	STMN4	-1.00359	0.324921	0.999924	2.75956
ENSG00000015676.13	NUDCD3	0.181128	0.412987	0.999924	7.12822
ENSG00000016082.10	ISL1	-1.38158	0.023262	0.662726	1.4866
ENSG00000016391.6	CHDH	0.124634	0.671423	0.999924	5.77943
ENSG00000016402.8	IL20RA	-0.512114	0.482535	0.999924	-0.174637
ENSG00000016864.12	GLT8D1	0.0689101	0.782762	0.999924	5.73222
ENSG00000017260.15	ATP2C1	0.320256	0.265433	0.999924	7.32198
ENSG00000017373.11	SRCIN1	0.25837	0.459951	0.999924	5.2178
ENSG00000017427.11	IGF1	1.83408	0.00126416	0.304039	4.34761
ENSG00000017483.10	SLC38A5	0.85652	0.143872	0.998736	-0.160736
ENSG00000017621.11	MAGIX	-0.856848	0.154594	0.999924	0.972572
ENSG00000017797.7	RALBP1	0.0106009	0.964579	0.999924	6.28932
ENSG00000018189.8	RUFY3	0.237411	0.326019	0.999924	5.1258
ENSG00000018236.10	CNTN1	0.541809	0.505131	0.999924	3.24525
ENSG00000018280.12	SLC11A1	0.028127	0.954472	0.999924	1.41106
ENSG00000018408.10	WWTR1	0.216868	0.611412	0.999924	3.41868
ENSG00000018510.8	AGPS	0.230421	0.429526	0.999924	5.04768
ENSG00000018610.9	CXorf56	-0.121981	0.627349	0.999924	4.46073
ENSG00000018699.7	TTC27	-0.0695497	0.811018	0.999924	4.69168
ENSG00000018869.12	ZNF582	0.466364	0.193291	0.999924	2.95408
ENSG00000019102.7	VSIG2	-0.182584	0.742114	0.999924	-0.217941
ENSG00000019144.12	PHLDB1	0.159223	0.51555	0.999924	5.18681
ENSG00000019485.8	PRDM11	0.272443	0.529147	0.999924	1.26234
ENSG00000019991.11	HGF	-0.246041	0.784233	0.999924	6.82574
ENSG00000019995.6	ZRANB1	-0.0288299	0.904756	0.999924	5.90876
ENSG00000020129.11	NCDN	0.232916	0.433635	0.999924	6.13894
ENSG00000020219.8	CCT8L1P	-0.469365	0.49001	0.999924	-0.670776
ENSG00000020256.15	ZFP64	0.171203	0.517711	0.999924	4.96187
ENSG00000020426.6	MNAT1	-0.107571	0.652684	0.999924	4.54252
ENSG00000020577.9	SAMD4A	0.20805	0.563514	0.999924	4.71483
ENSG00000020922.8	MRE11A	0.0342524	0.911236	0.999924	3.83959
ENSG00000021300.9	PLEKHB1	0.301495	0.53615	0.999924	4.31684
ENSG00000021355.8	SERPINB1	0.0875279	0.759447	0.999924	6.07203
ENSG00000021488.8	SLC7A9	0.628751	0.28236	0.999924	-0.0355339
ENSG00000021574.7	SPAST	-0.0742956	0.757121	0.999924	5.23522
ENSG00000021762.15	OSBPL5	0.123216	0.719089	0.999924	5.47165
ENSG00000021776.6	AQR	0.0888307	0.67437	0.999924	6.292
ENSG00000021826.10	CPS1	-0.920289	0.341594	0.999924	3.51441
ENSG00000022277.8	RTFDC1	0.0977251	0.6755	0.999924	5.57656
ENSG00000022355.10	GABRA1	-0.854444	0.215657	0.999924	5.13871
ENSG00000022567.5	SLC45A4	0.599184	0.0651482	0.872671	3.79305
ENSG00000022840.11	RNF10	0.0261126	0.907563	0.999924	7.74023
ENSG00000022976.11	ZNF839	-0.0542011	0.811634	0.999924	5.45459
ENSG00000023041.7	ZDHHC6	0.0325114	0.891299	0.999924	4.86796
ENSG00000023191.12	RNH1	-0.189335	0.446425	0.999924	6.7908
ENSG00000023228.9	NDUFS1	-0.0765684	0.736172	0.999924	7.89667
ENSG00000023287.8	RB1CC1	0.132726	0.624286	0.999924	6.55665
ENSG00000023318.7	ERP44	-0.0925419	0.70177	0.999924	6.7477
ENSG00000023330.10	ALAS1	0.079298	0.807689	0.999924	6.09686
ENSG00000023445.9	BIRC3	0.287886	0.520946	0.999924	1.66164
ENSG00000023516.7	AKAP11	-0.114606	0.615714	0.999924	6.9464
ENSG00000023572.4	GLRX2	-0.361134	0.347692	0.999924	4.32033
ENSG00000023608.4	SNAPC1	-0.0350066	0.905017	0.999924	3.41755
ENSG00000023697.8	DERA	-0.0483728	0.91425	0.999924	4.93032
ENSG00000023734.6	STRAP	0.017635	0.938172	0.999924	7.95396
ENSG00000023839.6	ABCC2	0.124249	0.848825	0.999924	4.63502
ENSG00000023892.9	DEF6	-0.36467	0.26906	0.999924	4.37593
ENSG00000023902.9	PLEKHO1	0.582738	0.19028	0.999924	4.03538
ENSG00000023909.5	GCLM	-0.0719584	0.884028	0.999924	5.32743
ENSG00000024048.6	UBR2	0.103378	0.608372	0.999924	6.56252
ENSG00000024422.7	EHD2	0.156102	0.710986	0.999924	1.27237
ENSG00000024526.12	DEPDC1	-0.357493	0.604332	0.999924	5.92028
ENSG00000024862.12	CCDC28A	0.215965	0.448516	0.999924	3.63331
ENSG00000025039.10	RRAGD	0.292124	0.387006	0.999924	6.39486
ENSG00000025156.8	HSF2	-0.28931	0.244348	0.999924	4.56464
ENSG00000025293.11	PHF20	0.0851802	0.66507	0.999924	6.40801
ENSG00000025423.7	HSD17B6	0.42547	0.441023	0.999924	1.6691
ENSG00000025434.14	NR1H3	0.186295	0.646994	0.999924	3.34757
ENSG00000025708.8	TYMP	0.125706	0.692222	0.999924	3.70254
ENSG00000025770.14	NCAPH2	-0.531689	0.197116	0.999924	5.84425
ENSG00000025772.7	TOMM34	0.269465	0.323868	0.999924	5.87476
ENSG00000025796.9	SEC63	-0.169182	0.498696	0.999924	6.70427
ENSG00000025800.9	KPNA6	0.0476544	0.825091	0.999924	7.10753
ENSG00000026025.9	VIM	-1.35941	0.0219117	0.647641	3.53182
ENSG00000026036.16	RTEL1-TNFRSF6B	0.655092	0.176788	0.999924	3.04229
ENSG00000026103.15	FAS	-0.303342	0.55765	0.999924	3.59265
ENSG00000026297.11	RNASET2	0.195475	0.606682	0.999924	3.36516
ENSG00000026508.12	CD44	0.599997	0.254035	0.999924	6.41518
ENSG00000026559.9	KCNG1	-2.7507	0.0537159	0.843648	2.22181
ENSG00000026652.9	AGPAT4	-0.351665	0.566511	0.999924	1.40859
ENSG00000026950.12	BTN3A1	-0.272015	0.639534	0.999924	2.74995
ENSG00000027001.7	MIPEP	-0.0449793	0.902772	0.999924	4.93456
ENSG00000027075.9	PRKCH	-0.299185	0.644516	0.999924	2.59439
ENSG00000027697.8	IFNGR1	0.149221	0.544299	0.999924	4.8749
ENSG00000027847.9	B4GALT7	-0.160892	0.554539	0.999924	4.06598
ENSG00000027869.7	SH2D2A	1.04458	0.0638922	0.868221	0.492412
ENSG00000028116.12	VRK2	0.0811752	0.732567	0.999924	4.96728
ENSG00000028203.13	VEZT	0.137352	0.525203	0.999924	7.16452
ENSG00000028277.16	POU2F2	0.851988	0.173584	0.999924	0.308031
ENSG00000028310.13	BRD9	0.0155271	0.939708	0.999924	5.55635
ENSG00000028528.10	SNX1	0.237769	0.360802	0.999924	7.28502
ENSG00000028839.5	TBPL1	0.128922	0.690523	0.999924	4.80222
ENSG00000029153.10	ARNTL2	-0.306926	0.602405	0.999924	4.17232
ENSG00000029363.11	BCLAF1	-0.264831	0.282478	0.999924	8.0695
ENSG00000029364.7	SLC39A9	-0.182406	0.362099	0.999924	6.841
ENSG00000029534.15	ANK1	0.114595	0.82729	0.999924	4.29815
ENSG00000029639.6	TFB1M	-0.168784	0.597581	0.999924	3.09443
ENSG00000029725.12	RABEP1	-0.0729593	0.714016	0.999924	6.91726
ENSG00000029993.10	HMGB3	-0.198321	0.60761	0.999924	6.13217
ENSG00000030066.9	NUP160	0.0211561	0.943409	0.999924	6.64304
ENSG00000030110.8	BAK1	0.0404079	0.902485	0.999924	3.26069
ENSG00000030419.12	IKZF2	-0.261297	0.571178	0.999924	2.5972
ENSG00000030582.12	GRN	-0.181038	0.552777	0.999924	6.67304
ENSG00000031003.6	FAM13B	0.0231757	0.928434	0.999924	5.73636
ENSG00000031081.6	ARHGAP31	-0.0211795	0.953691	0.999924	3.52131
ENSG00000031544.10	NR2E3	-0.235741	0.696655	0.999924	0.153322
ENSG00000031691.6	CENPQ	-0.507142	0.255489	0.999924	4.07209
ENSG00000031698.8	SARS	-0.161498	0.611429	0.999924	7.83842
ENSG00000031823.10	RANBP3	-0.0954729	0.630849	0.999924	6.21191
ENSG00000032219.14	ARID4A	0.137942	0.589236	0.999924	5.65527
ENSG00000032389.8	TSSC1	-0.0951225	0.69848	0.999924	4.96319
ENSG00000032444.11	PNPLA6	0.177981	0.51317	0.999924	6.45658
ENSG00000032742.13	IFT88	0.518158	0.142193	0.997351	4.76413
ENSG00000033011.7	ALG1	0.0340856	0.891407	0.999924	4.02334
ENSG00000033030.9	ZCCHC8	-0.125481	0.648773	0.999924	5.98801
ENSG00000033050.3	ABCF2	0.0404448	0.89038	0.999924	6.81856
ENSG00000033100.10	CHPF2	-0.169211	0.610714	0.999924	5.61275
ENSG00000033122.14	LRRC7	0.182821	0.701137	0.999924	1.89757
ENSG00000033170.12	FUT8	-0.253971	0.406737	0.999924	4.08119
ENSG00000033178.8	UBA6	0.348868	0.186328	0.999924	6.8169
ENSG00000033327.8	GAB2	-0.477046	0.285492	0.999924	4.61606
ENSG00000033627.10	ATP6V0A1	-0.101641	0.706195	0.999924	6.86471
ENSG00000033800.9	PIAS1	0.0422902	0.854426	0.999924	5.02953
ENSG00000033867.12	SLC4A7	0.146472	0.653854	0.999924	4.43595
ENSG00000034053.10	APBA2	0.670965	0.0422229	0.78985	5.36319
ENSG00000034063.9	UHRF1	-0.564227	0.340726	0.999924	4.96698
ENSG00000034152.14	MAP2K3	0.245166	0.347678	0.999924	6.04007
ENSG00000034510.4	TMSB10	-0.000610625	0.998513	0.999924	10.816
ENSG00000034533.7	ASTE1	-0.155148	0.612689	0.999924	2.91202
ENSG00000034677.7	RNF19A	0.0758157	0.911767	0.999924	5.79896
ENSG00000034693.10	PEX3	-0.17884	0.511869	0.999924	4.69629
ENSG00000034713.3	GABARAPL2	0.105841	0.649281	0.999924	6.18548
ENSG00000035115.17	SH3YL1	0.745438	0.0483574	0.819793	4.2578
ENSG00000035141.3	FAM136A	-0.0702663	0.754547	0.999924	6.59707
ENSG00000035403.12	VCL	-0.0942673	0.694539	0.999924	7.3744
ENSG00000035499.8	DEPDC1B	-0.387859	0.591581	0.999924	4.57058
ENSG00000035664.7	DAPK2	0.14402	0.779722	0.999924	2.21593
ENSG00000035681.3	NSMAF	-0.0057482	0.981782	0.999924	5.3368
ENSG00000035687.9	ADSS	-0.25376	0.298961	0.999924	5.58183
ENSG00000035862.8	TIMP2	-1.08611	0.147352	0.999305	1.03365
ENSG00000035928.10	RFC1	0.000369957	0.998703	0.999924	7.0878
ENSG00000036054.8	TBC1D23	0.182149	0.500057	0.999924	4.14417
ENSG00000036257.8	CUL3	6.5198e-05	0.999748	0.999924	7.13706
ENSG00000036448.5	MYOM2	0.485735	0.544754	0.999924	0.532121
ENSG00000036530.4	CYP46A1	-1.20992	0.112373	0.954307	0.793959
ENSG00000036549.8	ZZZ3	0.234544	0.337605	0.999924	6.49184
ENSG00000036672.11	USP2	-0.772118	0.0842755	0.926195	1.56749
ENSG00000037042.8	TUBG2	0.321817	0.304496	0.999924	3.8373
ENSG00000037241.3	RPL26L1	-0.10439	0.70712	0.999924	3.37056
ENSG00000037280.11	FLT4	-1.65439	0.0312509	0.707294	0.766334
ENSG00000037474.10	NSUN2	-0.00187495	0.99269	0.999924	7.07729
ENSG00000037637.6	FBXO42	-0.0714042	0.80495	0.999924	6.16382
ENSG00000037749.7	MFAP3	-0.0352541	0.887088	0.999924	6.40706
ENSG00000037757.9	MRI1	0.075312	0.79942	0.999924	4.41313
ENSG00000037897.12	METTL1	-0.095041	0.744037	0.999924	4.89304
ENSG00000037965.4	HOXC8	-0.481609	0.384439	0.999924	2.51858
ENSG00000038002.4	AGA	-0.272471	0.454734	0.999924	3.12067
ENSG00000038210.9	PI4K2B	-0.406311	0.243623	0.999924	5.62778
ENSG00000038219.8	BOD1L1	-0.112228	0.698778	0.999924	6.64121
ENSG00000038274.12	MAT2B	0.140331	0.535972	0.999924	6.06125
ENSG00000038295.3	TLL1	-1.61236	0.00087636	0.273342	1.58763
ENSG00000038358.10	EDC4	0.0613987	0.789081	0.999924	6.34065
ENSG00000038382.13	TRIO	0.127374	0.617535	0.999924	6.55282
ENSG00000038427.11	VCAN	-1.24634	0.0532598	0.843267	3.89959
ENSG00000038532.10	CLEC16A	-0.0248761	0.904184	0.999924	5.69762
ENSG00000038945.10	MSR1	1.31551	0.11718	0.957655	-0.79275
ENSG00000039068.14	CDH1	0.0391717	0.863693	0.999924	8.73786
ENSG00000039123.11	SKIV2L2	0.0373201	0.866471	0.999924	6.52923
ENSG00000039139.9	DNAH5	1.57805	0.0571991	0.861263	2.21913
ENSG00000039319.12	ZFYVE16	0.0294698	0.888251	0.999924	5.98047
ENSG00000039523.13	FAM65A	0.324418	0.182442	0.999924	5.8923
ENSG00000039560.9	RAI14	-0.459522	0.114813	0.954307	5.48062
ENSG00000039650.5	PNKP	0.027196	0.927265	0.999924	6.09527
ENSG00000039987.2	BEST2	-0.0457424	0.931141	0.999924	0.319817
ENSG00000040199.14	PHLPP2	-0.0957343	0.715753	0.999924	4.95649
ENSG00000040275.12	SPDL1	-0.273283	0.545062	0.999924	5.18348
ENSG00000040341.13	STAU2	-0.171121	0.470564	0.999924	5.50858
ENSG00000040487.8	PQLC2	-0.159095	0.616331	0.999924	3.86444
ENSG00000040531.10	CTNS	0.224442	0.384935	0.999924	4.26597
ENSG00000040608.9	RTN4R	0.70268	0.109663	0.95237	2.7244
ENSG00000040633.8	PHF23	0.125131	0.576313	0.999924	6.14454
ENSG00000040731.6	CDH10	-1.56809	0.0619723	0.86699	0.8674
ENSG00000040933.11	INPP4A	-0.00104722	0.99717	0.999924	5.07397
ENSG00000041353.5	RAB27B	-0.63285	0.212605	0.999924	6.09498
ENSG00000041357.11	PSMA4	-0.0883998	0.756777	0.999924	7.2483
ENSG00000041802.6	LSG1	-0.0882029	0.66787	0.999924	5.99043
ENSG00000041880.10	PARP3	0.00163661	0.996708	0.999924	3.55438
ENSG00000041982.10	TNC	0.865486	0.39738	0.999924	6.02815
ENSG00000041988.11	THAP3	0.239289	0.361998	0.999924	3.76473
ENSG00000042062.7	FAM65C	0.0785835	0.887727	0.999924	0.516403
ENSG00000042088.9	TDP1	-0.195511	0.522824	0.999924	4.98283
ENSG00000042286.10	AIFM2	0.52595	0.415323	0.999924	2.22411
ENSG00000042317.12	SPATA7	0.224234	0.652685	0.999924	3.03523
ENSG00000042429.6	MED17	-0.331835	0.171774	0.999924	5.58272
ENSG00000042445.9	RETSAT	0.11177	0.721807	0.999924	5.17736
ENSG00000042493.11	CAPG	0.0207088	0.961005	0.999924	2.31059
ENSG00000042753.7	AP2S1	-0.139279	0.700769	0.999924	6.7116
ENSG00000042781.8	USH2A	0.206747	0.757945	0.999924	-0.573677
ENSG00000043093.9	DCUN1D1	0.174968	0.441106	0.999924	5.26537
ENSG00000043143.16	PHF15	-0.00154602	0.994988	0.999924	6.13713
ENSG00000043355.6	ZIC2	0.439883	0.288987	0.999924	4.82224
ENSG00000043514.11	TRIT1	0.487721	0.0413274	0.78546	4.87362
ENSG00000043591.4	ADRB1	0.802665	0.156345	0.999924	0.651103
ENSG00000044090.4	CUL7	0.267764	0.381929	0.999924	6.16692
ENSG00000044115.16	CTNNA1	0.0543258	0.818282	0.999924	8.79328
ENSG00000044446.7	PHKA2	0.200458	0.466586	0.999924	4.174
ENSG00000044459.10	CNTLN	-0.178765	0.658622	0.999924	4.87659
ENSG00000044524.6	EPHA3	-0.0572979	0.943354	0.999924	7.94266
ENSG00000044574.7	HSPA5	-0.701465	0.219562	0.999924	9.8762
ENSG00000046604.8	DSG2	0.126724	0.691243	0.999924	6.79598
ENSG00000046647.9	GEMIN8	0.180403	0.538408	0.999924	4.17353
ENSG00000046651.10	OFD1	0.0954065	0.688698	0.999924	5.32287
ENSG00000046653.10	GPM6B	1.1011	0.0080011	0.479532	3.13171
ENSG00000046889.14	PREX2	0.320534	0.644233	0.999924	1.33816
ENSG00000047056.10	WDR37	-0.0190112	0.93531	0.999924	5.19058
ENSG00000047188.11	YTHDC2	0.0230142	0.913062	0.999924	6.43528
ENSG00000047230.10	CTPS2	0.253123	0.260647	0.999924	5.04109
ENSG00000047249.12	ATP6V1H	-0.0809571	0.768095	0.999924	5.7684
ENSG00000047315.10	POLR2B	0.0470332	0.819599	0.999924	7.37855
ENSG00000047346.8	FAM214A	0.135738	0.638856	0.999924	4.87513
ENSG00000047365.7	ARAP2	-0.213647	0.400314	0.999924	4.20566
ENSG00000047410.9	TPR	0.102073	0.620761	0.999924	8.82193
ENSG00000047457.9	CP	0.913356	0.305516	0.999924	1.04966
ENSG00000047578.8	KIAA0556	0.283678	0.235878	0.999924	6.24995
ENSG00000047579.15	DTNBP1	0.113513	0.621978	0.999924	4.16419
ENSG00000047597.5	XK	0.115442	0.767032	0.999924	2.23834
ENSG00000047617.10	ANO2	-0.772066	0.356055	0.999924	-1.10842
ENSG00000047621.7	C12orf4	-0.161002	0.547866	0.999924	5.46613
ENSG00000047634.10	SCML1	-0.523916	0.0668179	0.873827	5.73568
ENSG00000047644.13	WWC3	0.349774	0.242341	0.999924	3.6836
ENSG00000047648.17	ARHGAP6	0.137272	0.789002	0.999924	6.84501
ENSG00000047662.4	FAM184B	0.429504	0.444115	0.999924	0.776135
ENSG00000047849.17	MAP4	0.138376	0.51961	0.999924	9.11788
ENSG00000047932.9	GOPC	-0.0400611	0.8523	0.999924	6.31916
ENSG00000048028.7	USP28	-0.21883	0.483183	0.999924	4.67197
ENSG00000048052.17	HDAC9	1.15821	0.0277877	0.693775	1.70308
ENSG00000048140.13	TSPAN17	0.131802	0.616885	0.999924	5.87517
ENSG00000048162.15	NOP16	-0.352361	0.202414	0.999924	5.88075
ENSG00000048342.11	CC2D2A	0.324467	0.468977	0.999924	3.23213
ENSG00000048392.7	RRM2B	-0.286416	0.324168	0.999924	5.95241
ENSG00000048405.5	ZNF800	-0.0904604	0.733759	0.999924	6.009
ENSG00000048471.9	SNX29	-0.182995	0.450301	0.999924	4.28387
ENSG00000048540.10	LMO3	0.281326	0.598285	0.999924	0.699066
ENSG00000048544.5	MRPS10	-0.0227008	0.935552	0.999924	4.99682
ENSG00000048649.9	RSF1	0.194357	0.476672	0.999924	6.38277
ENSG00000048707.9	VPS13D	-0.0798367	0.710975	0.999924	7.19845
ENSG00000048828.12	FAM120A	0.16485	0.373859	0.999924	8.22104
ENSG00000048991.12	R3HDM1	-0.0547992	0.807052	0.999924	5.37168
ENSG00000049089.9	COL9A2	-0.083285	0.933645	0.999924	3.44682
ENSG00000049130.9	KITLG	-0.443976	0.384313	0.999924	4.29434
ENSG00000049167.9	ERCC8	0.0992494	0.719423	0.999924	3.44686
ENSG00000049192.10	ADAMTS6	0.0413615	0.949657	0.999924	-0.219435
ENSG00000049239.8	H6PD	0.0347643	0.928821	0.999924	5.60762
ENSG00000049245.8	VAMP3	-0.410781	0.105347	0.946304	5.79525
ENSG00000049246.10	PER3	-2.05711	0.00311017	0.401769	1.38714
ENSG00000049283.13	EPN3	0.12865	0.784013	0.999924	5.88113
ENSG00000049323.11	LTBP1	0.48988	0.203116	0.999924	3.22758
ENSG00000049449.4	RCN1	0.250251	0.528185	0.999924	5.98222
ENSG00000049540.12	ELN	1.88127	0.0148751	0.58385	0.0105661
ENSG00000049541.6	RFC2	-0.313604	0.489358	0.999924	6.6953
ENSG00000049618.17	ARID1B	0.0273633	0.907533	0.999924	6.69429
ENSG00000049656.9	CLPTM1L	0.129232	0.600281	0.999924	6.76005
ENSG00000049759.12	NEDD4L	-0.0508369	0.88431	0.999924	7.55716
ENSG00000049768.10	FOXP3	-0.238543	0.630507	0.999924	0.489692
ENSG00000049769.8	PPP1R3F	0.325733	0.483157	0.999924	3.76164
ENSG00000049860.9	HEXB	-0.0323	0.899653	0.999924	6.55319
ENSG00000049883.10	PTCD2	-0.00991126	0.971394	0.999924	3.86965
ENSG00000050030.9	KIAA2022	-0.560027	0.391414	0.999924	2.58873
ENSG00000050130.13	JKAMP	-0.159687	0.584853	0.999924	5.59302
ENSG00000050327.10	ARHGEF5	0.388293	0.343955	0.999924	3.7038
ENSG00000050344.8	NFE2L3	0.625366	0.125171	0.972953	4.2441
ENSG00000050393.7	MCUR1	-0.368832	0.140401	0.993157	6.15667
ENSG00000050405.9	LIMA1	-0.149441	0.551041	0.999924	6.59012
ENSG00000050426.11	LETMD1	0.423533	0.216462	0.999924	7.08987
ENSG00000050438.12	SLC4A8	-0.439746	0.462983	0.999924	2.79341
ENSG00000050555.13	LAMC3	0.724779	0.215286	0.999924	0.819264
ENSG00000050628.16	PTGER3	-0.227887	0.512773	0.999924	1.74109
ENSG00000050748.13	MAPK9	-0.242548	0.327763	0.999924	6.26423
ENSG00000050820.12	BCAR1	0.120745	0.652631	0.999924	5.96135
ENSG00000051009.6	FAM160A2	-0.0527208	0.831008	0.999924	5.21765
ENSG00000051108.10	HERPUD1	-0.717287	0.0513754	0.837149	7.59048
ENSG00000051128.14	HOMER3	0.992658	0.00630999	0.442281	3.24671
ENSG00000051180.12	RAD51	-0.42611	0.515335	0.999924	5.04369
ENSG00000051341.9	POLQ	-0.578615	0.342173	0.999924	5.18622
ENSG00000051382.4	PIK3CB	-0.00233833	0.993818	0.999924	6.13333
ENSG00000051523.6	CYBA	0.446773	0.50513	0.999924	0.626839
ENSG00000051596.5	THOC3	0.00448999	0.98943	0.999924	3.21404
ENSG00000051620.6	HEBP2	0.396538	0.246119	0.999924	8.46145
ENSG00000051825.10	MPHOSPH9	-0.18941	0.536885	0.999924	6.48564
ENSG00000052126.10	PLEKHA5	-0.0546583	0.837463	0.999924	5.7572
ENSG00000052344.11	PRSS8	0.362196	0.425446	0.999924	3.76497
ENSG00000052723.7	SIKE1	-0.116204	0.621645	0.999924	5.93837
ENSG00000052749.9	RRP12	-0.095387	0.685081	0.999924	7.03139
ENSG00000052795.8	FNIP2	0.0223862	0.934638	0.999924	4.55298
ENSG00000052802.8	MSMO1	-0.747973	0.166598	0.999924	6.93549
ENSG00000052841.10	TTC17	0.223958	0.530646	0.999924	7.03182
ENSG00000052850.5	ALX4	-0.965259	0.0247732	0.668969	2.54297
ENSG00000053108.12	FSTL4	0.338953	0.464649	0.999924	2.36075
ENSG00000053254.11	FOXN3	-0.268621	0.47422	0.999924	4.60019
ENSG00000053328.8	METTL24	0.675395	0.411302	0.999924	-0.796502
ENSG00000053371.8	AKR7A2	0.0117846	0.963566	0.999924	5.32821
ENSG00000053372.4	MRTO4	-0.120524	0.600974	0.999924	6.03589
ENSG00000053438.7	NNAT	-1.53265	0.000404111	0.222511	0.999414
ENSG00000053501.8	USE1	0.0468069	0.864793	0.999924	4.17872
ENSG00000053524.7	MCF2L2	0.120876	0.881363	0.999924	-0.937762
ENSG00000053702.10	NRIP2	-0.131825	0.710586	0.999924	2.76415
ENSG00000053747.11	LAMA3	-1.26674	0.220387	0.999924	2.54436
ENSG00000053770.7	AP5M1	-0.096806	0.646077	0.999924	6.05945
ENSG00000053900.6	ANAPC4	0.190029	0.482537	0.999924	4.92491
ENSG00000053918.11	KCNQ1	-0.31637	0.647837	0.999924	0.393786
ENSG00000054116.7	TRAPPC3	-0.0218414	0.914998	0.999924	5.76186
ENSG00000054118.9	THRAP3	-0.173618	0.365162	0.999924	8.40557
ENSG00000054148.13	PHPT1	0.0783453	0.758283	0.999924	6.46827
ENSG00000054179.7	ENTPD2	-0.270415	0.500058	0.999924	4.47858
ENSG00000054267.16	ARID4B	0.348173	0.123361	0.969122	7.42139
ENSG00000054277.8	OPN3	0.41038	0.380476	0.999924	0.636521
ENSG00000054282.11	SDCCAG8	0.130694	0.568248	0.999924	5.30197
ENSG00000054392.8	HHAT	-0.0131748	0.981238	0.999924	2.6167
ENSG00000054523.12	KIF1B	0.0043497	0.983674	0.999924	7.09075
ENSG00000054598.5	FOXC1	-0.893513	0.251936	0.999924	1.14421
ENSG00000054611.9	TBC1D22A	0.155321	0.483969	0.999924	4.73507
ENSG00000054654.11	SYNE2	-0.189307	0.660395	0.999924	6.72502
ENSG00000054690.9	PLEKHH1	0.53609	0.341036	0.999924	6.41304
ENSG00000054793.9	ATP9A	0.00106019	0.996711	0.999924	6.63223
ENSG00000054803.3	CBLN4	-0.594849	0.496962	0.999924	-1.12304
ENSG00000054965.6	FAM168A	-0.126864	0.651428	0.999924	6.57116
ENSG00000054967.8	RELT	-1.01121	0.15698	0.999924	3.41447
ENSG00000054983.12	GALC	0.372809	0.308943	0.999924	4.04085
ENSG00000055044.6	NOP58	-0.180771	0.469312	0.999924	7.16359
ENSG00000055070.12	SZRD1	0.0715606	0.717402	0.999924	7.22529
ENSG00000055118.10	KCNH2	0.130595	0.700489	0.999924	5.10221
ENSG00000055130.11	CUL1	0.235833	0.471133	0.999924	6.7464
ENSG00000055147.13	FAM114A2	-0.178359	0.446935	0.999924	5.46652
ENSG00000055163.14	CYFIP2	-0.159813	0.728778	0.999924	5.78728
ENSG00000055208.13	TAB2	0.133705	0.541289	0.999924	5.91061
ENSG00000055211.8	GINM1	-0.198794	0.374382	0.999924	5.71712
ENSG00000055332.12	EIF2AK2	-0.259372	0.305485	0.999924	6.56538
ENSG00000055483.15	USP36	0.0852648	0.752026	0.999924	6.19043
ENSG00000055609.13	KMT2C	0.317677	0.350734	0.999924	7.71528
ENSG00000055732.8	MCOLN3	-0.654581	0.406186	0.999924	-0.26649
ENSG00000055813.5	CCDC85A	-0.933168	0.261903	0.999924	3.83158
ENSG00000055917.11	PUM2	0.0574922	0.824585	0.999924	7.76047
ENSG00000055950.12	MRPL43	0.113017	0.648565	0.999924	5.74596
ENSG00000055955.11	ITIH4	0.704416	0.299555	0.999924	-0.211906
ENSG00000056050.6	C4orf27	0.128359	0.701154	0.999924	3.52478
ENSG00000056097.11	ZFR	0.035942	0.861478	0.999924	6.8761
ENSG00000056277.11	ZNF280C	-0.3608	0.228092	0.999924	4.0451
ENSG00000056487.11	PHF21B	0.731492	0.128837	0.974899	5.41945
ENSG00000056558.6	TRAF1	0.808443	0.0665481	0.873827	3.2753
ENSG00000056586.11	RC3H2	-0.0528655	0.815428	0.999924	7.01254
ENSG00000056661.9	PCGF2	0.178601	0.508428	0.999924	5.79259
ENSG00000056736.5	IL17RB	-0.412448	0.294802	0.999924	4.80079
ENSG00000056972.14	TRAF3IP2	0.0600886	0.903032	0.999924	4.10822
ENSG00000056998.14	GYG2	1.03322	0.157575	0.999924	0.037754
ENSG00000057019.11	DCBLD2	-0.202894	0.567287	0.999924	4.58003
ENSG00000057252.8	SOAT1	0.44888	0.227427	0.999924	6.70882
ENSG00000057294.9	PKP2	0.102255	0.716164	0.999924	4.6982
ENSG00000057468.6	MSH4	1.13123	0.193248	0.999924	1.16714
ENSG00000057608.12	GDI2	0.172771	0.479679	0.999924	7.86945
ENSG00000057657.10	PRDM1	0.903718	0.155278	0.999924	0.131584
ENSG00000057663.8	ATG5	0.0873384	0.704699	0.999924	5.46744
ENSG00000057704.6	TMCC3	0.361818	0.578955	0.999924	3.85926
ENSG00000057757.5	PITHD1	-0.159625	0.468975	0.999924	5.7437
ENSG00000057935.9	MTA3	0.318178	0.275024	0.999924	4.63774
ENSG00000058056.4	USP13	0.0806497	0.768053	0.999924	5.6634
ENSG00000058063.11	ATP11B	-0.144441	0.744558	0.999924	5.77453
ENSG00000058085.10	LAMC2	0.398695	0.53198	0.999924	1.75061
ENSG00000058091.12	CDK14	0.278641	0.579458	0.999924	6.41639
ENSG00000058262.5	SEC61A1	-0.0675885	0.747205	0.999924	8.20958
ENSG00000058272.11	PPP1R12A	-0.00100945	0.996335	0.999924	6.66959
ENSG00000058335.11	RASGRF1	-1.7346	0.0544166	0.847981	0.305636
ENSG00000058404.15	CAMK2B	0.823955	0.045773	0.80521	5.31204
ENSG00000058453.12	CROCC	0.0261464	0.92692	0.999924	5.15269
ENSG00000058600.11	POLR3E	0.334881	0.126791	0.973802	6.25722
ENSG00000058668.10	ATP2B4	0.779925	0.0596178	0.863497	4.63522
ENSG00000058673.11	ZC3H11A	0.0179564	0.936238	0.999924	7.46669
ENSG00000058729.6	RIOK2	-0.137702	0.545466	0.999924	4.87507
ENSG00000058799.9	YIPF1	0.195969	0.576048	0.999924	4.73447
ENSG00000058804.10	NDC1	-0.311471	0.406806	0.999924	6.69755
ENSG00000058866.10	DGKG	-1.73446	0.00534916	0.43481	-0.0122085
ENSG00000059122.12	FLYWCH1	0.0671972	0.800439	0.999924	5.30155
ENSG00000059145.14	UNKL	0.341174	0.311294	0.999924	5.02132
ENSG00000059377.11	TBXAS1	-0.576251	0.359529	0.999924	0.614998
ENSG00000059378.8	PARP12	0.00989394	0.981897	0.999924	3.47312
ENSG00000059573.4	ALDH18A1	-0.0767864	0.68537	0.999924	7.44087
ENSG00000059588.5	TARBP1	0.19081	0.585511	0.999924	5.38787
ENSG00000059691.7	PET112	-0.120821	0.656404	0.999924	4.91188
ENSG00000059728.6	MXD1	-0.870507	0.00599916	0.439064	4.75608
ENSG00000059758.3	CDK17	-0.288724	0.299974	0.999924	5.47511
ENSG00000059769.15	DNAJC25	-0.00933099	0.972261	0.999924	3.95366
ENSG00000059915.12	PSD	0.291936	0.375534	0.999924	5.70485
ENSG00000060069.12	CTDP1	-0.156231	0.50894	0.999924	5.10079
ENSG00000060138.8	YBX3	0.977376	0.00356776	0.411698	8.67541
ENSG00000060140.4	STYK1	1.14925	0.000221662	0.15258	5.10557
ENSG00000060237.12	WNK1	-0.0589979	0.78101	0.999924	8.35884
ENSG00000060339.9	CCAR1	0.0700577	0.746573	0.999924	7.39152
ENSG00000060491.12	OGFR	-0.17902	0.490331	0.999924	5.62206
ENSG00000060558.3	GNA15	-0.251881	0.74735	0.999924	-0.863306
ENSG00000060642.6	PIGV	0.247213	0.294835	0.999924	4.8161
ENSG00000060656.15	PTPRU	-0.474426	0.117754	0.959821	5.60926
ENSG00000060688.8	SNRNP40	-0.125093	0.608853	0.999924	5.88276
ENSG00000060749.10	QSER1	0.274611	0.422362	0.999924	6.07189
ENSG00000060762.14	MPC1	-0.20504	0.529474	0.999924	4.06374
ENSG00000060971.13	ACAA1	0.186138	0.530354	0.999924	5.34887
ENSG00000060982.10	BCAT1	0.507712	0.502505	0.999924	3.63572
ENSG00000061273.13	HDAC7	0.532029	0.0859642	0.928523	6.06533
ENSG00000061455.10	PRDM6	-0.814047	0.172637	0.999924	2.37762
ENSG00000061656.5	SPAG4	0.0996066	0.873336	0.999924	1.49376
ENSG00000061676.10	NCKAP1	-0.0845952	0.736155	0.999924	8.27879
ENSG00000061794.8	MRPS35	-0.190356	0.436851	0.999924	7.42707
ENSG00000061918.8	GUCY1B3	-0.996874	0.0189622	0.628359	4.08565
ENSG00000061936.5	SFSWAP	-0.039041	0.857291	0.999924	6.52285
ENSG00000061938.12	TNK2	0.413775	0.38143	0.999924	5.29163
ENSG00000061987.10	MON2	-0.00139195	0.995905	0.999924	6.96013
ENSG00000062038.9	CDH3	0.104355	0.731443	0.999924	6.18808
ENSG00000062194.11	GPBP1	0.030702	0.877458	0.999924	6.88698
ENSG00000062282.10	DGAT2	0.255182	0.601655	0.999924	4.11539
ENSG00000062370.12	ZNF112	0.371696	0.204758	0.999924	3.12825
ENSG00000062485.14	CS	-0.0818481	0.762258	0.999924	8.81901
ENSG00000062524.11	LTK	0.416974	0.563743	0.999924	-0.508474
ENSG00000062582.9	MRPS24	-0.427481	0.515107	0.999924	-0.398444
ENSG00000062598.13	ELMO2	-0.025424	0.914437	0.999924	5.65179
ENSG00000062650.13	WAPAL	-0.0624129	0.773149	0.999924	6.83588
ENSG00000062716.6	VMP1	0.240354	0.493699	0.999924	6.06374
ENSG00000062725.5	APPBP2	0.190125	0.403218	0.999924	5.74387
ENSG00000062822.8	POLD1	-0.221309	0.5353	0.999924	6.30784
ENSG00000063015.15	SEZ6	-0.365991	0.543975	0.999924	5.85431
ENSG00000063046.13	EIF4B	0.249667	0.485231	0.999924	8.75247
ENSG00000063127.11	SLC6A16	0.697773	0.121824	0.967962	2.37907
ENSG00000063169.6	GLTSCR1	0.0017666	0.995306	0.999924	4.77801
ENSG00000063176.11	SPHK2	-0.056003	0.831487	0.999924	4.53883
ENSG00000063177.8	RPL18	0.208055	0.443342	0.999924	9.35711
ENSG00000063180.4	CA11	0.42484	0.210105	0.999924	5.18312
ENSG00000063241.3	ISOC2	-0.149013	0.699436	0.999924	6.57788
ENSG00000063244.8	U2AF2	-0.0981125	0.636778	0.999924	8.16323
ENSG00000063245.10	EPN1	0.128646	0.560916	0.999924	6.94911
ENSG00000063322.9	MED29	-0.0746272	0.704872	0.999924	6.16707
ENSG00000063438.12	AHRR	0.351099	0.481697	0.999924	2.28876
ENSG00000063587.12	ZNF275	-0.280911	0.242294	0.999924	5.29713
ENSG00000063601.12	MTMR1	0.0646756	0.77445	0.999924	6.0418
ENSG00000063660.4	GPC1	0.0888447	0.808103	0.999924	4.38638
ENSG00000063761.11	ADCK1	0.255639	0.418951	0.999924	3.47135
ENSG00000063854.8	HAGH	-0.171076	0.420859	0.999924	5.82328
ENSG00000063978.11	RNF4	-0.194919	0.349028	0.999924	6.35277
ENSG00000064012.17	CASP8	-0.471666	0.396223	0.999924	3.45236
ENSG00000064042.13	LIMCH1	-0.0589012	0.871183	0.999924	7.80076
ENSG00000064102.10	ASUN	0.184589	0.491811	0.999924	5.97982
ENSG00000064115.6	TM7SF3	0.036071	0.860015	0.999924	7.01867
ENSG00000064195.7	DLX3	0.477923	0.635562	0.999924	2.72296
ENSG00000064199.2	SPA17	-0.0180592	0.960019	0.999924	4.02791
ENSG00000064201.11	TSPAN32	-0.366622	0.667924	0.999924	0.254775
ENSG00000064205.6	WISP2	0.231352	0.783874	0.999924	-0.56857
ENSG00000064225.8	ST3GAL6	-0.858142	0.112981	0.954307	0.717722
ENSG00000064270.8	ATP2C2	-0.277505	0.656959	0.999924	1.05251
ENSG00000064300.4	NGFR	-0.847066	0.201336	0.999924	-0.379877
ENSG00000064309.10	CDON	-0.679391	0.193493	0.999924	2.82586
ENSG00000064313.7	TAF2	-0.170643	0.466411	0.999924	5.94371
ENSG00000064393.11	HIPK2	0.428078	0.20393	0.999924	8.20212
ENSG00000064419.9	TNPO3	0.287011	0.285727	0.999924	6.86736
ENSG00000064490.9	RFXANK	0.0303548	0.896215	0.999924	4.5606
ENSG00000064545.10	TMEM161A	0.0165507	0.939245	0.999924	5.11866
ENSG00000064547.9	LPAR2	0.721326	0.201559	0.999924	2.91209
ENSG00000064601.12	CTSA	0.158324	0.627357	0.999924	5.9006
ENSG00000064607.12	SUGP2	0.166236	0.51561	0.999924	6.61228
ENSG00000064651.9	SLC12A2	-0.608107	0.394288	0.999924	7.64029
ENSG00000064652.6	SNX24	0.137512	0.659925	0.999924	3.09022
ENSG00000064666.10	CNN2	-0.46933	0.364716	0.999924	4.42745
ENSG00000064687.8	ABCA7	-0.124393	0.664918	0.999924	6.3168
ENSG00000064692.14	SNCAIP	0.292107	0.534602	0.999924	0.800229
ENSG00000064703.7	DDX20	-0.0720627	0.763769	0.999924	5.40589
ENSG00000064726.5	BTBD1	-0.0663125	0.777963	0.999924	7.02171
ENSG00000064763.6	FAR2	-0.0982953	0.747821	0.999924	6.42513
ENSG00000064787.8	BCAS1	-0.656244	0.439915	0.999924	3.09105
ENSG00000064932.11	SBNO2	-0.110472	0.658727	0.999924	7.07032
ENSG00000064933.12	PMS1	0.0987139	0.689606	0.999924	5.57218
ENSG00000064961.14	HMG20B	-0.0872815	0.769994	0.999924	8.29627
ENSG00000064989.8	CALCRL	1.55507	0.0211186	0.644594	0.794882
ENSG00000064995.12	TAF11	0.0135232	0.956059	0.999924	5.28682
ENSG00000064999.12	ANKS1A	0.267153	0.287235	0.999924	5.98038
ENSG00000065000.11	AP3D1	-0.0296837	0.898369	0.999924	8.18858
ENSG00000065029.10	ZNF76	-0.0225709	0.921857	0.999924	6.26978
ENSG00000065054.9	SLC9A3R2	0.181805	0.588698	0.999924	6.22553
ENSG00000065057.3	NTHL1	0.0321712	0.904616	0.999924	4.38748
ENSG00000065060.12	UHRF1BP1	-0.159384	0.65419	0.999924	6.54288
ENSG00000065135.7	GNAI3	-0.0357755	0.901448	0.999924	6.76634
ENSG00000065150.14	IPO5	0.0101476	0.965761	0.999924	8.34133
ENSG00000065154.7	OAT	-0.529254	0.105428	0.946304	6.12331
ENSG00000065183.11	WDR3	0.157925	0.521939	0.999924	6.5832
ENSG00000065243.14	PKN2	0.263733	0.193381	0.999924	6.77466
ENSG00000065268.6	WDR18	-0.185771	0.487	0.999924	5.60204
ENSG00000065308.4	TRAM2	-0.423663	0.249952	0.999924	4.61196
ENSG00000065320.4	NTN1	-0.174991	0.764475	0.999924	0.785943
ENSG00000065328.12	MCM10	-0.514749	0.427161	0.999924	5.80068
ENSG00000065357.15	DGKA	-0.0260529	0.937773	0.999924	4.90069
ENSG00000065361.10	ERBB3	0.152269	0.6706	0.999924	8.20168
ENSG00000065413.12	ANKRD44	-0.404102	0.258281	0.999924	2.58038
ENSG00000065427.10	KARS	0.140691	0.601561	0.999924	7.39692
ENSG00000065457.6	ADAT1	-0.0490985	0.861611	0.999924	5.52476
ENSG00000065485.13	PDIA5	-0.145673	0.601174	0.999924	4.91871
ENSG00000065491.8	TBC1D22B	-0.127115	0.643245	0.999924	4.20026
ENSG00000065518.7	NDUFB4	0.294199	0.415698	0.999924	6.75462
ENSG00000065526.6	SPEN	0.00607837	0.982275	0.999924	7.8902
ENSG00000065534.14	MYLK	0.991933	0.0451401	0.802133	3.20571
ENSG00000065548.13	ZC3H15	-0.164087	0.453093	0.999924	6.6159
ENSG00000065559.10	MAP2K4	-0.0494596	0.857776	0.999924	5.44489
ENSG00000065600.8	TMEM206	-0.129782	0.603206	0.999924	3.86911
ENSG00000065609.10	SNAP91	-0.275438	0.374462	0.999924	5.49781
ENSG00000065613.9	SLK	-0.0421136	0.837338	0.999924	7.27722
ENSG00000065615.9	CYB5R4	6.60183e-05	0.999796	0.999924	3.54418
ENSG00000065618.12	COL17A1	1.32901	0.128711	0.97471	-0.684353
ENSG00000065621.10	GSTO2	-0.0804325	0.81018	0.999924	6.26013
ENSG00000065665.16	SEC61A2	-0.16297	0.523386	0.999924	3.78103
ENSG00000065717.10	TLE2	0.203929	0.519825	0.999924	4.81554
ENSG00000065802.7	ASB1	0.225639	0.330599	0.999924	5.25392
ENSG00000065809.9	FAM107B	0.168942	0.639656	0.999924	5.12711
ENSG00000065833.7	ME1	1.04437	0.147023	0.999305	3.79352
ENSG00000065882.11	TBC1D1	-0.0402724	0.882673	0.999924	5.6254
ENSG00000065883.10	CDK13	0.16107	0.556996	0.999924	6.76411
ENSG00000065911.7	MTHFD2	-0.425475	0.385318	0.999924	7.81689
ENSG00000065923.5	SLC9A7	-0.00366641	0.993142	0.999924	3.63764
ENSG00000065970.4	FOXJ2	-0.537222	0.0436905	0.795667	6.13856
ENSG00000065978.13	YBX1	0.181082	0.579042	0.999924	8.10636
ENSG00000065989.11	PDE4A	-0.307046	0.319801	0.999924	4.41888
ENSG00000066027.7	PPP2R5A	-0.149754	0.564345	0.999924	5.77968
ENSG00000066032.14	CTNNA2	-0.806949	0.332732	0.999924	4.33683
ENSG00000066044.9	ELAVL1	-0.011971	0.95763	0.999924	7.23302
ENSG00000066084.8	DIP2B	0.123522	0.542859	0.999924	7.1816
ENSG00000066117.10	SMARCD1	0.0619875	0.765176	0.999924	7.02871
ENSG00000066135.8	KDM4A	0.237068	0.338577	0.999924	6.00133
ENSG00000066136.15	NFYC	0.0225714	0.92744	0.999924	5.61565
ENSG00000066185.8	ZMYND12	-0.136911	0.795688	0.999924	0.627892
ENSG00000066230.6	SLC9A3	0.813523	0.347898	0.999924	0.958779
ENSG00000066248.10	NGEF	-0.292523	0.473993	0.999924	2.71855
ENSG00000066279.12	ASPM	-0.281854	0.668885	0.999924	7.14923
ENSG00000066322.8	ELOVL1	-0.12662	0.674195	0.999924	6.82831
ENSG00000066336.7	SPI1	-0.322445	0.658722	0.999924	0.0582336
ENSG00000066379.10	ZNRD1	0.294734	0.281315	0.999924	3.30055
ENSG00000066382.12	MPPED2	0.353134	0.409464	0.999924	1.02616
ENSG00000066422.4	ZBTB11	0.0842139	0.7073	0.999924	6.2892
ENSG00000066427.17	ATXN3	-0.0104363	0.972687	0.999924	4.95672
ENSG00000066455.8	GOLGA5	-0.0120459	0.956113	0.999924	5.89693
ENSG00000066557.5	LRRC40	-0.0532201	0.852177	0.999924	5.6696
ENSG00000066583.7	ISOC1	-0.476858	0.0967193	0.934969	5.56392
ENSG00000066629.12	EML1	-0.094362	0.840752	0.999924	4.13948
ENSG00000066651.13	TRMT11	-0.0292902	0.924274	0.999924	4.16571
ENSG00000066654.8	THUMPD1	0.0172204	0.933128	0.999924	6.47561
ENSG00000066697.10	MSANTD3	-0.0194509	0.944191	0.999924	3.77058
ENSG00000066735.10	KIF26A	-2.05828	0.0232736	0.662726	0.846348
ENSG00000066739.7	ATG2B	0.223616	0.489243	0.999924	6.25496
ENSG00000066777.4	ARFGEF1	0.0804046	0.705139	0.999924	6.81802
ENSG00000066827.11	ZFAT	0.191166	0.453013	0.999924	3.9473
ENSG00000066855.11	MTFR1	-0.342036	0.1803	0.999924	5.67237
ENSG00000066923.13	STAG3	0.40351	0.280077	0.999924	3.3698
ENSG00000066926.6	FECH	0.191262	0.560072	0.999924	7.32366
ENSG00000066933.11	MYO9A	-0.0218482	0.929691	0.999924	6.57182
ENSG00000067048.12	DDX3Y	-0.355938	0.204292	0.999924	6.65381
ENSG00000067057.12	PFKP	-0.175362	0.809783	0.999924	3.60989
ENSG00000067064.6	IDI1	-0.959418	0.0369807	0.751839	7.00545
ENSG00000067066.12	SP100	-1.00054	0.351421	0.999924	1.22288
ENSG00000067082.10	KLF6	-1.10762	0.0393878	0.767831	6.28964
ENSG00000067113.12	PPAP2A	0.895023	0.124358	0.972362	6.37226
ENSG00000067141.12	NEO1	0.168778	0.494886	0.999924	5.93437
ENSG00000067167.3	TRAM1	-0.258913	0.29246	0.999924	6.48813
ENSG00000067177.10	PHKA1	-0.233157	0.276434	0.999924	5.61458
ENSG00000067182.3	TNFRSF1A	-0.0316021	0.887337	0.999924	6.23527
ENSG00000067191.11	CACNB1	-0.0536091	0.866631	0.999924	2.84626
ENSG00000067208.10	EVI5	-0.167476	0.53401	0.999924	4.3943
ENSG00000067221.9	STOML1	-0.214357	0.517957	0.999924	3.44544
ENSG00000067225.13	PKM	-0.0219072	0.936952	0.999924	9.331
ENSG00000067248.5	DHX29	0.0901236	0.74399	0.999924	5.86794
ENSG00000067334.9	DNTTIP2	-0.315257	0.207436	0.999924	6.53127
ENSG00000067365.10	METTL22	0.0157533	0.95196	0.999924	3.81159
ENSG00000067369.9	TP53BP1	0.179773	0.433418	0.999924	6.75066
ENSG00000067445.16	TRO	-0.256067	0.683249	0.999924	-0.335392
ENSG00000067533.5	RRP15	-0.0460483	0.837717	0.999924	6.81066
ENSG00000067560.6	RHOA	-0.0522502	0.82588	0.999924	8.90163
ENSG00000067596.6	DHX8	-0.0835	0.700015	0.999924	6.50794
ENSG00000067601.6	PMS2P4	-0.307926	0.455673	0.999924	1.34059
ENSG00000067606.11	PRKCZ	0.416527	0.186341	0.999924	4.24829
ENSG00000067646.7	ZFY	-0.0116318	0.969067	0.999924	4.69882
ENSG00000067704.8	IARS2	-0.0450746	0.863836	0.999924	8.25078
ENSG00000067715.9	SYT1	0.53621	0.288775	0.999924	1.50155
ENSG00000067798.9	NAV3	-0.552701	0.399072	0.999924	0.221947
ENSG00000067829.14	IDH3G	-0.144651	0.503084	0.999924	6.01659
ENSG00000067836.8	ROGDI	0.226717	0.559752	0.999924	5.26353
ENSG00000067840.8	PDZD4	-0.54845	0.267845	0.999924	4.91623
ENSG00000067842.13	ATP2B3	-0.567797	0.573745	0.999924	0.779907
ENSG00000067900.6	ROCK1	-0.142003	0.465577	0.999924	6.80363
ENSG00000067955.9	CBFB	0.0225803	0.931993	0.999924	5.97351
ENSG00000067992.8	PDK3	-0.878378	0.0230956	0.661155	3.07302
ENSG00000068001.9	HYAL2	0.151941	0.579035	0.999924	5.14449
ENSG00000068024.12	HDAC4	0.21379	0.608851	0.999924	3.53616
ENSG00000068028.13	RASSF1	0.0397285	0.893039	0.999924	4.68831
ENSG00000068078.13	FGFR3	0.0679016	0.85825	0.999924	6.49646
ENSG00000068079.3	IFI35	-0.0536583	0.872265	0.999924	2.28454
ENSG00000068097.10	HEATR6	0.303616	0.181845	0.999924	4.75554
ENSG00000068120.10	COASY	-0.0299058	0.907639	0.999924	6.92772
ENSG00000068137.10	PLEKHH3	-0.190674	0.500049	0.999924	6.32879
ENSG00000068305.13	MEF2A	0.0410863	0.892933	0.999924	5.69377
ENSG00000068308.9	OTUD5	0.165715	0.465866	0.999924	6.03644
ENSG00000068323.12	TFE3	-0.250586	0.288366	0.999924	5.0287
ENSG00000068354.11	TBC1D25	0.141968	0.584195	0.999924	3.93437
ENSG00000068366.15	ACSL4	-0.905122	0.080403	0.912993	3.60603
ENSG00000068383.14	INPP5A	-0.542641	0.472214	0.999924	5.22455
ENSG00000068394.9	GPKOW	-0.141683	0.571535	0.999924	5.13176
ENSG00000068400.9	GRIPAP1	-0.0805576	0.74871	0.999924	6.56798
ENSG00000068438.10	FTSJ1	-0.100024	0.718517	0.999924	5.60928
ENSG00000068489.8	PRR11	-0.302098	0.664725	0.999924	4.24135
ENSG00000068615.12	REEP1	-0.492906	0.435011	0.999924	2.75933
ENSG00000068650.14	ATP11A	0.479744	0.487618	0.999924	0.0445403
ENSG00000068654.11	POLR1A	0.0473091	0.82238	0.999924	7.22273
ENSG00000068697.6	LAPTM4A	0.042971	0.858	0.999924	6.65991
ENSG00000068724.11	TTC7A	-0.202547	0.545535	0.999924	3.10429
ENSG00000068745.10	IP6K2	0.28445	0.213838	0.999924	6.66722
ENSG00000068784.8	SRBD1	-0.0480194	0.866606	0.999924	3.94711
ENSG00000068793.13	CYFIP1	0.193771	0.468379	0.999924	7.68869
ENSG00000068796.12	KIF2A	-0.168753	0.567372	0.999924	5.88056
ENSG00000068831.14	RASGRP2	0.0761233	0.897489	0.999924	1.31844
ENSG00000068878.10	PSME4	-0.0504245	0.860514	0.999924	7.06727
ENSG00000068885.10	IFT80	-0.0137037	0.970819	0.999924	4.32561
ENSG00000068903.15	SIRT2	0.045182	0.846636	0.999924	5.6679
ENSG00000068912.9	ERLEC1	-0.149228	0.549388	0.999924	5.46996
ENSG00000068971.9	PPP2R5B	-0.130309	0.732568	0.999924	4.60194
ENSG00000068976.9	PYGM	-0.857543	0.157734	0.999924	0.228718
ENSG00000069011.11	PITX1	-0.961985	0.00371356	0.411698	4.21274
ENSG00000069020.14	MAST4	0.119833	0.700721	0.999924	4.47708
ENSG00000069122.14	GPR116	0.891494	0.493614	0.999924	0.962736
ENSG00000069188.12	SDK2	0.208307	0.78277	0.999924	-0.682628
ENSG00000069248.9	NUP133	0.0214295	0.916072	0.999924	7.26759
ENSG00000069275.12	NUCKS1	-0.0712634	0.753911	0.999924	9.79386
ENSG00000069329.11	VPS35	0.092393	0.679021	0.999924	7.61463
ENSG00000069345.7	DNAJA2	-0.0803941	0.716176	0.999924	6.85689
ENSG00000069399.8	BCL3	0.422668	0.410297	0.999924	4.20125
ENSG00000069424.10	KCNAB2	0.398925	0.250689	0.999924	3.95184
ENSG00000069431.6	ABCC9	-0.43936	0.63042	0.999924	-0.24872
ENSG00000069482.6	GAL	1.01038	0.0553828	0.854856	4.2541
ENSG00000069493.10	CLEC2D	0.454731	0.338166	0.999924	1.2788
ENSG00000069509.5	FUNDC1	0.0105319	0.970269	0.999924	4.01389
ENSG00000069667.11	RORA	-0.371445	0.504795	0.999924	1.38456
ENSG00000069696.6	DRD4	0.726381	0.103257	0.943603	2.35698
ENSG00000069702.6	TGFBR3	-0.0883046	0.83833	0.999924	2.02808
ENSG00000069712.9	KIAA1107	-0.177306	0.518736	0.999924	3.51913
ENSG00000069764.5	PLA2G10	0.531833	0.443985	0.999924	-0.716358
ENSG00000069812.7	HES2	0.608813	0.388856	0.999924	1.14253
ENSG00000069849.6	ATP1B3	-0.130236	0.678548	0.999924	5.51103
ENSG00000069869.11	NEDD4	0.242993	0.552626	0.999924	4.58033
ENSG00000069943.5	PIGB	0.122455	0.630306	0.999924	3.90376
ENSG00000069956.7	MAPK6	-0.112564	0.727845	0.999924	6.53058
ENSG00000069966.14	GNB5	-0.257032	0.422399	0.999924	2.91812
ENSG00000069974.11	RAB27A	-0.673686	0.122769	0.967962	3.9657
ENSG00000069998.8	CECR5	0.0581919	0.825307	0.999924	5.82631
ENSG00000070010.14	UFD1L	-0.190494	0.49051	0.999924	6.20376
ENSG00000070018.4	LRP6	0.324074	0.279015	0.999924	6.29797
ENSG00000070019.3	GUCY2C	0.8413	0.274738	0.999924	0.239953
ENSG00000070031.3	SCT	0.926635	0.116177	0.955794	0.0961313
ENSG00000070047.7	PHRF1	-0.1567	0.518636	0.999924	6.71627
ENSG00000070061.10	IKBKAP	0.149627	0.48553	0.999924	6.62049
ENSG00000070081.11	NUCB2	-0.42884	0.155073	0.999924	6.91569
ENSG00000070087.9	PFN2	0.00281031	0.99058	0.999924	6.80109
ENSG00000070159.9	PTPN3	0.0697092	0.73546	0.999924	6.14941
ENSG00000070182.13	SPTB	-0.231712	0.547611	0.999924	3.86825
ENSG00000070190.8	DAPP1	-0.379392	0.618244	0.999924	-0.661484
ENSG00000070214.11	SLC44A1	0.119186	0.675924	0.999924	6.51903
ENSG00000070269.9	TMEM260	0.269147	0.426136	0.999924	5.15724
ENSG00000070366.9	SMG6	-0.0591528	0.783129	0.999924	5.69611
ENSG00000070367.11	EXOC5	-0.291363	0.213702	0.999924	6.47479
ENSG00000070371.11	CLTCL1	0.614923	0.0950855	0.93462	4.4658
ENSG00000070388.7	FGF22	0.130635	0.780404	0.999924	1.57382
ENSG00000070404.5	FSTL3	0.0312738	0.936402	0.999924	3.99315
ENSG00000070413.14	DGCR2	-0.00821252	0.969307	0.999924	6.33021
ENSG00000070423.13	RNF126	-0.149059	0.515673	0.999924	6.0437
ENSG00000070444.10	MNT	-0.153526	0.629228	0.999924	5.62441
ENSG00000070476.10	ZXDC	-0.290005	0.261676	0.999924	5.49684
ENSG00000070495.10	JMJD6	-0.351546	0.180999	0.999924	5.11621
ENSG00000070501.7	POLB	0.19462	0.38973	0.999924	4.84365
ENSG00000070526.10	ST6GALNAC1	0.442276	0.562557	0.999924	-0.838839
ENSG00000070540.8	WIPI1	-0.00567852	0.989459	0.999924	3.23338
ENSG00000070601.5	FRMPD1	0.731185	0.24919	0.999924	1.9351
ENSG00000070610.10	GBA2	0.254263	0.313618	0.999924	7.01896
ENSG00000070614.10	NDST1	0.382552	0.119477	0.963246	7.10021
ENSG00000070669.12	ASNS	-0.0996428	0.836755	0.999924	7.78439
ENSG00000070718.7	AP3M2	0.275827	0.327943	0.999924	5.36632
ENSG00000070731.5	ST6GALNAC2	0.136435	0.785998	0.999924	1.99564
ENSG00000070756.9	PABPC1	0.176471	0.592079	0.999924	10.1755
ENSG00000070759.12	TESK2	-0.478166	0.13285	0.982919	3.18442
ENSG00000070761.3	C16orf80	-0.293248	0.307967	0.999924	5.11553
ENSG00000070770.4	CSNK2A2	0.148462	0.500232	0.999924	6.54602
ENSG00000070778.8	PTPN21	0.0392403	0.951929	0.999924	4.17327
ENSG00000070785.12	EIF2B3	-0.28073	0.353851	0.999924	4.57332
ENSG00000070814.13	TCOF1	-0.1212	0.692534	0.999924	7.37273
ENSG00000070831.11	CDC42	0.00838907	0.968783	0.999924	7.1852
ENSG00000070882.8	OSBPL3	-0.521784	0.204382	0.999924	5.44185
ENSG00000070886.6	EPHA8	1.21988	0.0618228	0.866648	0.408619
ENSG00000070950.5	RAD18	-0.19719	0.570293	0.999924	5.58845
ENSG00000070961.10	ATP2B1	0.179734	0.572834	0.999924	7.20802
ENSG00000071051.9	NCK2	0.0494253	0.865459	0.999924	3.85702
ENSG00000071054.11	MAP4K4	0.483019	0.135388	0.985525	6.9395
ENSG00000071073.8	MGAT4A	0.464402	0.292321	0.999924	4.01835
ENSG00000071082.6	RPL31	0.489835	0.11472	0.954307	8.3063
ENSG00000071127.12	WDR1	0.0181236	0.946896	0.999924	7.81174
ENSG00000071189.17	SNX13	0.238699	0.314314	0.999924	6.55963
ENSG00000071205.7	ARHGAP10	-0.257238	0.552531	0.999924	2.74898
ENSG00000071242.7	RPS6KA2	-0.575958	0.449799	0.999924	1.76028
ENSG00000071243.11	ING3	-0.151011	0.640685	0.999924	5.06587
ENSG00000071246.6	VASH1	-0.327455	0.568389	0.999924	2.30344
ENSG00000071462.7	WBSCR22	0.0343431	0.881342	0.999924	6.94933
ENSG00000071537.9	SEL1L	-0.0997908	0.738438	0.999924	7.77861
ENSG00000071539.9	TRIP13	-0.26626	0.628373	0.999924	5.72035
ENSG00000071553.12	ATP6AP1	-0.0083893	0.976175	0.999924	7.48613
ENSG00000071564.10	TCF3	0.309547	0.217753	0.999924	7.01854
ENSG00000071575.7	TRIB2	-1.42431	0.122445	0.967962	-0.600089
ENSG00000071626.12	DAZAP1	0.107439	0.626567	0.999924	8.1817
ENSG00000071655.13	MBD3	0.0916013	0.697128	0.999924	6.65225
ENSG00000071794.11	HLTF	-0.0788662	0.756875	0.999924	7.69084
ENSG00000071859.10	FAM50A	-0.00590396	0.981328	0.999924	6.09537
ENSG00000071889.12	FAM3A	-0.151949	0.532744	0.999924	5.40618
ENSG00000071894.10	CPSF1	0.26678	0.209942	0.999924	7.21136
ENSG00000071994.6	PDCD2	0.217994	0.360077	0.999924	6.43551
ENSG00000072041.12	SLC6A15	0.0204247	0.960595	0.999924	4.98329
ENSG00000072042.8	RDH11	0.499937	0.261424	0.999924	8.40446
ENSG00000072062.9	PRKACA	-0.23123	0.438841	0.999924	6.92796
ENSG00000072071.12	LPHN1	-0.33438	0.165452	0.999924	6.95591
ENSG00000072110.9	ACTN1	0.248396	0.317498	0.999924	7.19292
ENSG00000072121.11	ZFYVE26	0.151869	0.635362	0.999924	5.31953
ENSG00000072133.6	RPS6KA6	0.11138	0.724791	0.999924	4.70055
ENSG00000072134.11	EPN2	0.11405	0.675917	0.999924	5.59072
ENSG00000072135.8	PTPN18	0.194644	0.4165	0.999924	7.63428
ENSG00000072195.10	SPEG	-0.160747	0.808049	0.999924	1.37715
ENSG00000072201.9	LNX1	0.446166	0.269112	0.999924	2.76264
ENSG00000072210.14	ALDH3A2	0.105293	0.714711	0.999924	10.7522
ENSG00000072274.8	TFRC	-0.374214	0.400172	0.999924	8.34214
ENSG00000072310.12	SREBF1	-0.720726	0.217347	0.999924	7.8713
ENSG00000072364.8	AFF4	-0.00819698	0.976058	0.999924	7.70375
ENSG00000072401.10	UBE2D1	-0.0478743	0.84404	0.999924	4.59356
ENSG00000072415.4	MPP5	0.0832165	0.672293	0.999924	5.83127
ENSG00000072422.12	RHOBTB1	0.909459	0.0696006	0.883561	3.54301
ENSG00000072501.13	SMC1A	-0.256079	0.430239	0.999924	8.60965
ENSG00000072506.8	HSD17B10	-0.0777242	0.801153	0.999924	6.47395
ENSG00000072518.16	MARK2	-0.0706161	0.726302	0.999924	7.00455
ENSG00000072571.15	HMMR	-0.307166	0.667111	0.999924	6.30344
ENSG00000072609.13	CHFR	-0.0938679	0.671844	0.999924	5.90273
ENSG00000072657.4	TRHDE	0.46778	0.391199	0.999924	3.03104
ENSG00000072682.14	P4HA2	-0.0597247	0.90655	0.999924	3.04623
ENSG00000072736.14	NFATC3	-0.0689785	0.780296	0.999924	5.12398
ENSG00000072756.12	TRNT1	0.319582	0.164333	0.999924	5.19828
ENSG00000072778.15	ACADVL	-0.0158477	0.950398	0.999924	8.8551
ENSG00000072786.8	STK10	0.0928328	0.736833	0.999924	4.52502
ENSG00000072803.13	FBXW11	0.122612	0.569321	0.999924	6.28335
ENSG00000072818.7	ACAP1	0.532996	0.374132	0.999924	2.43891
ENSG00000072832.10	CRMP1	0.729842	0.107961	0.948218	3.28523
ENSG00000072840.8	EVC	0.47554	0.301945	0.999924	5.14972
ENSG00000072849.6	DERL2	-0.301009	0.275702	0.999924	5.51021
ENSG00000072858.6	SIDT1	-0.938623	0.134611	0.985525	0.712862
ENSG00000072864.8	NDE1	-0.270556	0.496566	0.999924	4.77166
ENSG00000072954.2	TMEM38A	1.45188	0.00345881	0.411698	1.6993
ENSG00000072958.4	AP1M1	-0.221717	0.472471	0.999924	5.38247
ENSG00000073008.10	PVR	-0.0732485	0.740261	0.999924	6.64965
ENSG00000073009.8	IKBKG	0.453429	0.384483	0.999924	0.983508
ENSG00000073050.7	XRCC1	-0.0157975	0.950736	0.999924	5.0937
ENSG00000073060.11	SCARB1	-0.0601149	0.807306	0.999924	7.85358
ENSG00000073067.9	CYP2W1	-0.93253	0.290132	0.999924	0.305503
ENSG00000073111.9	MCM2	-0.342655	0.496494	0.999924	7.58001
ENSG00000073146.11	MOV10L1	-0.0802968	0.862282	0.999924	3.14586
ENSG00000073150.9	PANX2	0.136755	0.756848	0.999924	4.10719
ENSG00000073169.9	SELO	-0.149493	0.528532	0.999924	5.69743
ENSG00000073331.13	ALPK1	-0.228642	0.527237	0.999924	4.61698
ENSG00000073350.9	LLGL2	0.329753	0.155005	0.999924	7.28703
ENSG00000073417.10	PDE8A	-0.240203	0.35093	0.999924	5.63851
ENSG00000073464.7	CLCN4	0.243287	0.461574	0.999924	3.33133
ENSG00000073536.13	NLE1	-0.0367591	0.886862	0.999924	5.21847
ENSG00000073578.12	SDHA	0.08378	0.730273	0.999924	6.86443
ENSG00000073584.14	SMARCE1	0.0070093	0.97526	0.999924	6.28551
ENSG00000073605.14	GSDMB	0.816963	0.0544236	0.847981	4.39704
ENSG00000073614.7	KDM5A	0.0306806	0.883553	0.999924	7.17095
ENSG00000073670.9	ADAM11	0.284818	0.495365	0.999924	3.49982
ENSG00000073711.6	PPP2R3A	-0.0857025	0.779599	0.999924	3.48232
ENSG00000073712.9	FERMT2	0.0532451	0.834698	0.999924	5.51658
ENSG00000073756.7	PTGS2	-2.3105	0.000762575	0.267062	0.744506
ENSG00000073792.11	IGF2BP2	1.05959	0.0417309	0.786885	3.97765
ENSG00000073803.9	MAP3K13	-0.19087	0.424046	0.999924	5.37656
ENSG00000073849.10	ST6GAL1	1.24094	0.0100826	0.52758	5.33387
ENSG00000073910.15	FRY	-0.0977952	0.859846	0.999924	5.65105
ENSG00000073921.13	PICALM	0.0659804	0.729156	0.999924	7.42278
ENSG00000073969.14	NSF	0.00426935	0.988064	0.999924	5.91809
ENSG00000074047.16	GLI2	2.13134	0.0117548	0.546135	-0.826774
ENSG00000074054.13	CLASP1	0.0572935	0.794504	0.999924	5.86392
ENSG00000074071.9	MRPS34	0.0472733	0.851371	0.999924	7.16982
ENSG00000074181.4	NOTCH3	0.654736	0.183108	0.999924	6.13919
ENSG00000074201.4	CLNS1A	0.117718	0.598998	0.999924	6.93701
ENSG00000074211.9	PPP2R2C	-1.14818	0.142761	0.998736	3.40596
ENSG00000074219.9	TEAD2	0.714667	0.123874	0.970879	5.89222
ENSG00000074266.13	EED	-0.210118	0.524223	0.999924	4.80188
ENSG00000074276.6	CDHR2	0.56923	0.276822	0.999924	2.33068
ENSG00000074317.6	SNCB	-1.61631	0.0161269	0.591906	0.749343
ENSG00000074319.8	TSG101	-0.0369534	0.860509	0.999924	6.34488
ENSG00000074356.12	C17orf85	0.0525368	0.820777	0.999924	6.05524
ENSG00000074370.13	ATP2A3	-0.690621	0.266419	0.999924	0.900509
ENSG00000074410.9	CA12	1.10966	0.14451	0.999305	4.17974
ENSG00000074416.9	MGLL	0.837909	0.0604014	0.864889	2.95423
ENSG00000074527.7	NTN4	0.844732	0.255806	0.999924	0.17282
ENSG00000074582.8	BCS1L	0.230685	0.363753	0.999924	5.28065
ENSG00000074590.9	NUAK1	-0.40211	0.373338	0.999924	3.42513
ENSG00000074603.14	DPP8	0.13594	0.561623	0.999924	5.99166
ENSG00000074621.9	SLC24A1	-0.275777	0.393627	0.999924	3.45212
ENSG00000074657.9	ZNF532	0.555999	0.277332	0.999924	4.03807
ENSG00000074660.11	SCARF1	0.512695	0.300255	0.999924	2.1351
ENSG00000074695.5	LMAN1	-0.195751	0.401198	0.999924	6.72061
ENSG00000074696.8	PTPLAD1	-0.0389387	0.860456	0.999924	7.94555
ENSG00000074706.9	IPCEF1	0.987767	0.169729	0.999924	-0.290649
ENSG00000074755.10	ZZEF1	-0.213975	0.360271	0.999924	6.3599
ENSG00000074800.9	ENO1	-0.00937472	0.971221	0.999924	9.39629
ENSG00000074842.3	C19orf10	-0.239682	0.467578	0.999924	6.23494
ENSG00000074855.6	ANO8	-0.0470858	0.861896	0.999924	5.81914
ENSG00000074935.9	TUBE1	0.146472	0.760935	0.999924	5.5869
ENSG00000074964.12	ARHGEF10L	0.53678	0.357844	0.999924	4.80731
ENSG00000074966.6	TXK	-0.264662	0.761644	0.999924	-0.275811
ENSG00000075043.13	KCNQ2	-0.435889	0.454011	0.999924	2.62763
ENSG00000075073.10	TACR2	-0.872116	0.170457	0.999924	0.779848
ENSG00000075089.5	ACTR6	-0.052845	0.859209	0.999924	5.40614
ENSG00000075131.5	TIPIN	-0.434397	0.293713	0.999924	4.52131
ENSG00000075142.9	SRI	0.198223	0.450593	0.999924	5.72972
ENSG00000075151.15	EIF4G3	0.160108	0.537147	0.999924	7.34186
ENSG00000075188.4	NUP37	-0.327477	0.353195	0.999924	5.29372
ENSG00000075218.14	GTSE1	-0.384874	0.587441	0.999924	5.69816
ENSG00000075223.9	SEMA3C	-1.5448	0.0145114	0.581924	5.67205
ENSG00000075234.12	TTC38	-0.0625814	0.802872	0.999924	5.24553
ENSG00000075239.9	ACAT1	-0.0339245	0.909928	0.999924	6.24156
ENSG00000075240.12	GRAMD4	0.194304	0.452257	0.999924	4.85232
ENSG00000075275.12	CELSR1	0.486903	0.365011	0.999924	6.24703
ENSG00000075290.7	WNT8B	0.551216	0.166673	0.999924	2.40556
ENSG00000075292.14	ZNF638	0.0640299	0.765065	0.999924	7.6508
ENSG00000075303.8	SLC25A40	-0.167708	0.61444	0.999924	5.97582
ENSG00000075336.7	TIMM21	-0.0606938	0.825561	0.999924	5.14081
ENSG00000075391.12	RASAL2	0.199346	0.486476	0.999924	5.33277
ENSG00000075399.8	VPS9D1	-0.0277644	0.93936	0.999924	4.95662
ENSG00000075407.13	ZNF37A	-0.0716665	0.810001	0.999924	6.50266
ENSG00000075413.13	MARK3	-0.0870378	0.693347	0.999924	6.69124
ENSG00000075415.8	SLC25A3	-0.0249755	0.91476	0.999924	9.269
ENSG00000075420.8	FNDC3B	-0.206932	0.506976	0.999924	4.80067
ENSG00000075426.7	FOSL2	-0.230877	0.535001	0.999924	4.12226
ENSG00000075461.5	CACNG4	2.09151	0.0059573	0.439064	0.544956
ENSG00000075539.9	FRYL	0.00351683	0.988	0.999924	6.44016
ENSG00000075568.12	TMEM131	0.0445741	0.847573	0.999924	6.65512
ENSG00000075618.13	FSCN1	0.0540921	0.930303	0.999924	3.7121
ENSG00000075624.9	ACTB	-0.0789793	0.790629	0.999924	10.8328
ENSG00000075643.5	MOCOS	-0.858518	0.111097	0.953514	4.93476
ENSG00000075651.11	PLD1	0.191131	0.782863	0.999924	-0.0415826
ENSG00000075673.7	ATP12A	0.0321646	0.96823	0.999924	-0.352195
ENSG00000075702.12	WDR62	-0.720413	0.195656	0.999924	5.37132
ENSG00000075711.16	DLG1	0.153829	0.473916	0.999924	7.00362
ENSG00000075785.8	RAB7A	0.0672441	0.762949	0.999924	8.1348
ENSG00000075790.6	BCAP29	-0.253194	0.381411	0.999924	6.32574
ENSG00000075826.12	SEC31B	0.620859	0.225984	0.999924	4.30223
ENSG00000075856.7	SART3	-0.126883	0.558128	0.999924	7.15334
ENSG00000075884.8	ARHGAP15	0.181436	0.612413	0.999924	2.2342
ENSG00000075886.10	TUBA3D	0.202917	0.68939	0.999924	1.50478
ENSG00000075891.17	PAX2	-0.765752	0.14852	0.999924	2.11335
ENSG00000075914.8	EXOSC7	0.0742138	0.783475	0.999924	4.72573
ENSG00000075945.8	KIFAP3	-0.0286665	0.910213	0.999924	6.12531
ENSG00000075975.11	MKRN2	-0.159747	0.490502	0.999924	4.70649
ENSG00000076003.4	MCM6	-0.457035	0.334162	0.999924	6.57882
ENSG00000076043.5	REXO2	0.133138	0.569212	0.999924	5.25555
ENSG00000076053.6	RBM7	-0.0396351	0.874753	0.999924	3.86473
ENSG00000076067.7	RBMS2	0.0657864	0.837888	0.999924	3.74374
ENSG00000076108.7	BAZ2A	-0.0478158	0.822273	0.999924	8.98042
ENSG00000076201.10	PTPN23	-0.100024	0.657456	0.999924	6.74294
ENSG00000076242.10	MLH1	-0.138793	0.599858	0.999924	6.37593
ENSG00000076248.6	UNG	-0.361189	0.254077	0.999924	7.52599
ENSG00000076258.5	FMO4	0.384651	0.324521	0.999924	1.86424
ENSG00000076321.6	KLHL20	-0.165456	0.432537	0.999924	4.73472
ENSG00000076344.11	RGS11	0.0359122	0.948477	0.999924	4.84616
ENSG00000076351.8	SLC46A1	-0.104232	0.728029	0.999924	3.38312
ENSG00000076356.6	PLXNA2	0.84824	0.0366675	0.749188	6.04002
ENSG00000076382.12	SPAG5	-0.367661	0.533975	0.999924	6.80331
ENSG00000076513.12	ANKRD13A	-0.0619062	0.75906	0.999924	6.30925
ENSG00000076554.11	TPD52	0.112062	0.638127	0.999924	7.41498
ENSG00000076555.11	ACACB	0.122359	0.697812	0.999924	4.6729
ENSG00000076604.10	TRAF4	-0.150528	0.569941	0.999924	6.89367
ENSG00000076641.4	PAG1	-0.0370261	0.918136	0.999924	5.29694
ENSG00000076650.2	GPATCH1	0.0375831	0.87685	0.999924	4.21934
ENSG00000076662.5	ICAM3	0.214436	0.582476	0.999924	4.14014
ENSG00000076685.14	NT5C2	0.128833	0.554843	0.999924	5.04942
ENSG00000076706.10	MCAM	0.378469	0.497775	0.999924	2.28801
ENSG00000076716.7	GPC4	-0.035608	0.923235	0.999924	4.55168
ENSG00000076770.10	MBNL3	0.0244131	0.967649	0.999924	4.15209
ENSG00000076826.5	CAMSAP3	0.110249	0.670837	0.999924	6.49075
ENSG00000076864.15	RAP1GAP	1.30735	0.16001	0.999924	7.8365
ENSG00000076924.7	XAB2	-0.0190867	0.928585	0.999924	6.33474
ENSG00000076928.13	ARHGEF1	0.0479342	0.843347	0.999924	5.42082
ENSG00000076944.10	STXBP2	0.116938	0.68271	0.999924	5.54477
ENSG00000076984.13	MAP2K7	0.0450488	0.855282	0.999924	6.13166
ENSG00000077009.9	NMRK2	-0.933316	0.248251	0.999924	-0.77998
ENSG00000077044.5	DGKD	0.105623	0.732611	0.999924	5.45112
ENSG00000077063.6	CTTNBP2	0.677891	0.450247	0.999924	1.65736
ENSG00000077080.5	ACTL6B	0.628963	0.0481602	0.818887	4.22734
ENSG00000077092.14	RARB	-0.19892	0.607514	0.999924	3.44222
ENSG00000077097.9	TOP2B	0.119605	0.57421	0.999924	8.20982
ENSG00000077147.10	TM9SF3	0.0280863	0.907429	0.999924	8.33664
ENSG00000077150.13	NFKB2	0.187993	0.564298	0.999924	6.17315
ENSG00000077152.5	UBE2T	-0.349062	0.537189	0.999924	6.55481
ENSG00000077157.16	PPP1R12B	0.062574	0.823811	0.999924	6.41213
ENSG00000077232.12	DNAJC10	-0.13901	0.582432	0.999924	8.33627
ENSG00000077235.13	GTF3C1	0.118179	0.748444	0.999924	7.88471
ENSG00000077238.9	IL4R	1.2468	0.0687413	0.880754	0.683877
ENSG00000077254.10	USP33	0.0401217	0.850774	0.999924	6.28104
ENSG00000077264.10	PAK3	0.094714	0.876261	0.999924	2.16485
ENSG00000077312.4	SNRPA	-0.049121	0.867771	0.999924	6.36545
ENSG00000077348.4	EXOSC5	0.11395	0.677869	0.999924	4.42074
ENSG00000077380.11	DYNC1I2	0.255476	0.335347	0.999924	5.10339
ENSG00000077454.11	LRCH4	0.187423	0.574315	0.999924	6.58456
ENSG00000077458.8	FAM76B	-0.49829	0.145319	0.999305	5.29483
ENSG00000077463.10	SIRT6	-0.0754306	0.788986	0.999924	5.04028
ENSG00000077514.4	POLD3	-0.251222	0.52784	0.999924	5.60221
ENSG00000077522.8	ACTN2	-2.49265	0.0239074	0.66887	2.01595
ENSG00000077549.13	CAPZB	-0.0612787	0.807514	0.999924	7.34133
ENSG00000077585.9	GPR137B	-0.000967475	0.997172	0.999924	3.79406
ENSG00000077616.6	NAALAD2	0.360146	0.459008	0.999924	1.69742
ENSG00000077684.11	PHF17	-0.327425	0.31816	0.999924	6.10689
ENSG00000077713.14	SLC25A43	0.185803	0.596243	0.999924	4.20481
ENSG00000077721.11	UBE2A	-0.258373	0.311764	0.999924	5.86137
ENSG00000077782.15	FGFR1	-0.0421103	0.915511	0.999924	4.25781
ENSG00000077800.7	FKBP6	0.831182	0.244937	0.999924	-0.748874
ENSG00000077809.8	GTF2I	0.460296	0.120706	0.964588	6.92416
ENSG00000077935.12	SMC1B	-1.0116	0.104569	0.946185	3.84307
ENSG00000077942.13	FBLN1	1.18639	0.124668	0.972953	3.37072
ENSG00000078018.15	MAP2	-0.214606	0.710596	0.999924	6.84358
ENSG00000078043.11	PIAS2	0.20527	0.363716	0.999924	5.40093
ENSG00000078053.12	AMPH	-1.24485	0.240016	0.999924	0.941307
ENSG00000078061.8	ARAF	-0.392312	0.213299	0.999924	6.11957
ENSG00000078070.7	MCCC1	0.116983	0.688776	0.999924	6.12348
ENSG00000078081.3	LAMP3	-1.98001	0.101275	0.942907	3.74385
ENSG00000078114.14	NEBL	-0.388213	0.426533	0.999924	5.34115
ENSG00000078124.7	ACER3	-0.443133	0.202899	0.999924	6.03649
ENSG00000078140.9	UBE2K	-0.0832952	0.73121	0.999924	7.73983
ENSG00000078142.7	PIK3C3	-0.070923	0.804112	0.999924	5.41748
ENSG00000078177.9	N4BP2	-0.220759	0.569729	0.999924	5.66068
ENSG00000078237.4	C12orf5	-1.1167	0.0112808	0.541916	2.62034
ENSG00000078246.11	TULP3	-0.143726	0.62155	0.999924	5.88964
ENSG00000078269.9	SYNJ2	-0.469823	0.137796	0.988228	4.45102
ENSG00000078304.15	PPP2R5C	-0.117954	0.613904	0.999924	6.78733
ENSG00000078319.7	PMS2P1	0.551282	0.092739	0.931586	2.29568
ENSG00000078328.15	RBFOX1	0.08088	0.918249	0.999924	-0.898762
ENSG00000078369.13	GNB1	0.0196872	0.945865	0.999924	8.8031
ENSG00000078399.11	HOXA9	-0.225085	0.560104	0.999924	2.46724
ENSG00000078401.6	EDN1	0.246605	0.585664	0.999924	3.20139
ENSG00000078403.12	MLLT10	0.0317442	0.916658	0.999924	5.89188
ENSG00000078487.13	ZCWPW1	0.805913	0.0983414	0.937932	2.12469
ENSG00000078596.6	ITM2A	-0.00795029	0.992114	0.999924	-0.0760399
ENSG00000078618.15	NRD1	0.213452	0.297353	0.999924	7.40265
ENSG00000078668.9	VDAC3	-0.130891	0.643093	0.999924	6.85626
ENSG00000078674.13	PCM1	-0.0362184	0.866644	0.999924	8.05263
ENSG00000078687.12	TNRC6C	0.165086	0.537102	0.999924	4.73405
ENSG00000078699.17	CBFA2T2	0.201935	0.556183	0.999924	5.7693
ENSG00000078725.8	BRINP1	-0.16564	0.860955	0.999924	1.30031
ENSG00000078747.8	ITCH	-0.0818053	0.680788	0.999924	6.52417
ENSG00000078795.12	PKD2L2	-0.185539	0.77708	0.999924	-0.486263
ENSG00000078804.8	TP53INP2	-0.581158	0.0948882	0.93462	5.92554
ENSG00000078808.12	SDF4	0.0156632	0.948697	0.999924	7.3108
ENSG00000078814.11	MYH7B	0.895493	0.0249429	0.668969	1.85117
ENSG00000078900.10	TP73	-0.558627	0.364123	0.999924	3.01853
ENSG00000078902.11	TOLLIP	0.20314	0.513552	0.999924	5.43689
ENSG00000078967.8	UBE2D4	0.526798	0.0508981	0.836116	5.19151
ENSG00000079101.12	CLUL1	0.604098	0.181382	0.999924	1.43397
ENSG00000079112.5	CDH17	1.17713	0.0779424	0.907429	3.6085
ENSG00000079134.7	THOC1	0.0745919	0.770252	0.999924	6.02107
ENSG00000079150.13	FKBP7	0.272992	0.510108	0.999924	2.05381
ENSG00000079156.12	OSBPL6	-0.998927	0.0146668	0.581924	3.72055
ENSG00000079215.9	SLC1A3	-0.0499917	0.931678	0.999924	3.27457
ENSG00000079246.11	XRCC5	-0.145535	0.619902	0.999924	8.84363
ENSG00000079257.3	LXN	-0.207753	0.783225	0.999924	3.43868
ENSG00000079277.15	MKNK1	0.38204	0.173871	0.999924	4.35885
ENSG00000079308.12	TNS1	0.39942	0.517845	0.999924	2.58593
ENSG00000079313.7	REXO1	-0.041425	0.842455	0.999924	5.75753
ENSG00000079332.10	SAR1A	-0.109344	0.59034	0.999924	6.9315
ENSG00000079335.13	CDC14A	-0.2699	0.528779	0.999924	4.12537
ENSG00000079337.11	RAPGEF3	1.18201	0.0183484	0.619706	1.70718
ENSG00000079385.17	CEACAM1	0.625792	0.211056	0.999924	1.22694
ENSG00000079387.9	SENP1	-0.0669207	0.827836	0.999924	6.29924
ENSG00000079432.3	CIC	-0.140534	0.562304	0.999924	6.75162
ENSG00000079435.5	LIPE	-0.464475	0.182641	0.999924	2.98685
ENSG00000079459.8	FDFT1	-0.328963	0.528708	0.999924	9.07368
ENSG00000079462.3	PAFAH1B3	-0.0644315	0.862261	0.999924	6.09452
ENSG00000079482.11	OPHN1	0.0602861	0.861283	0.999924	3.82059
ENSG00000079616.8	KIF22	-0.201687	0.601535	0.999924	6.7402
ENSG00000079689.9	SCGN	0.664477	0.342635	0.999924	1.62789
ENSG00000079691.15	LRRC16A	0.149705	0.495944	0.999924	5.2418
ENSG00000079739.11	PGM1	0.2005	0.435587	0.999924	4.3937
ENSG00000079785.10	DDX1	-0.0685538	0.7613	0.999924	7.40536
ENSG00000079805.12	DNM2	-0.0692886	0.736312	0.999924	7.71915
ENSG00000079819.12	EPB41L2	-0.218397	0.683739	0.999924	4.06132
ENSG00000079841.14	RIMS1	-0.975356	0.0463289	0.810532	3.83346
ENSG00000079931.10	MOXD1	-0.300335	0.54736	0.999924	2.04419
ENSG00000079950.9	STX7	0.200752	0.549954	0.999924	5.10834
ENSG00000079974.13	RABL2B	0.0525143	0.863158	0.999924	3.24456
ENSG00000079999.9	KEAP1	-0.217755	0.315689	0.999924	6.28463
ENSG00000080031.5	PTPRH	-0.720894	0.339603	0.999924	1.28811
ENSG00000080166.11	DCT	1.68501	0.0699875	0.883675	1.00955
ENSG00000080189.10	SLC35C2	0.149067	0.498595	0.999924	5.88278
ENSG00000080200.5	CRYBG3	0.17321	0.63289	0.999924	2.83755
ENSG00000080224.13	EPHA6	-0.887657	0.112885	0.954307	4.176
ENSG00000080298.11	RFX3	0.317107	0.289534	0.999924	5.22916
ENSG00000080345.13	RIF1	-0.205718	0.427928	0.999924	6.58947
ENSG00000080371.4	RAB21	-0.169793	0.469348	0.999924	7.19959
ENSG00000080493.9	SLC4A4	-0.664211	0.267892	0.999924	2.53158
ENSG00000080503.15	SMARCA2	-0.271106	0.23363	0.999924	7.19297
ENSG00000080546.9	SESN1	-0.298211	0.532128	0.999924	4.16583
ENSG00000080561.9	MID2	-0.318838	0.303087	0.999924	3.15863
ENSG00000080603.12	SRCAP	-0.0721437	0.729191	0.999924	7.79593
ENSG00000080608.9	KIAA0020	-0.161523	0.496355	0.999924	6.21413
ENSG00000080618.9	CPB2	0.00648836	0.99262	0.999924	-0.831644
ENSG00000080644.11	CHRNA3	-0.797554	0.121558	0.967908	2.76988
ENSG00000080709.10	KCNN2	0.335325	0.433034	0.999924	3.82963
ENSG00000080802.14	CNOT4	0.324377	0.234053	0.999924	5.47086
ENSG00000080815.14	PSEN1	0.144181	0.491385	0.999924	6.17971
ENSG00000080819.2	CPOX	-0.0956609	0.710188	0.999924	4.89683
ENSG00000080822.12	CLDND1	-0.0601397	0.805013	0.999924	6.0793
ENSG00000080823.17	MOK	-0.113206	0.740304	0.999924	4.2262
ENSG00000080824.14	HSP90AA1	0.114628	0.751216	0.999924	10.3956
ENSG00000080839.7	RBL1	-0.320236	0.459111	0.999924	4.7364
ENSG00000080845.13	DLGAP4	0.508185	0.0811549	0.91578	5.85362
ENSG00000080854.10	IGSF9B	-1.52975	0.103593	0.943603	0.115579
ENSG00000080947.10	CROCCP3	0.560846	0.135351	0.985525	2.68025
ENSG00000080986.8	NDC80	-0.467609	0.480422	0.999924	5.497
ENSG00000081014.6	AP4E1	-0.0790399	0.771315	0.999924	5.12698
ENSG00000081019.9	RSBN1	0.325898	0.219634	0.999924	4.87202
ENSG00000081026.14	MAGI3	0.0285368	0.924218	0.999924	5.36146
ENSG00000081051.3	AFP	0.0714903	0.939923	0.999924	-0.849309
ENSG00000081052.10	COL4A4	-0.097905	0.823526	0.999924	1.22453
ENSG00000081059.15	TCF7	-0.978506	0.0254852	0.673717	2.45987
ENSG00000081087.10	OSTM1	-0.140814	0.643738	0.999924	4.78636
ENSG00000081138.9	CDH7	-1.55572	0.0057282	0.43897	3.99365
ENSG00000081148.11	IMPG2	0.420377	0.522539	0.999924	0.611749
ENSG00000081154.7	PCNP	-0.0675266	0.742536	0.999924	7.06497
ENSG00000081177.14	EXD2	0.0705829	0.761918	0.999924	5.27915
ENSG00000081181.3	ARG2	0.444537	0.387893	0.999924	4.52415
ENSG00000081189.9	MEF2C	-0.512541	0.313128	0.999924	2.62781
ENSG00000081277.7	PKP1	0.435435	0.43656	0.999924	2.76538
ENSG00000081307.8	UBA5	-0.0454265	0.85218	0.999924	6.10808
ENSG00000081320.6	STK17B	-0.508887	0.220576	0.999924	3.73542
ENSG00000081377.12	CDC14B	0.571749	0.103591	0.943603	3.58613
ENSG00000081386.8	ZNF510	0.252939	0.295902	0.999924	4.93806
ENSG00000081479.8	LRP2	0.61678	0.331553	0.999924	2.04112
ENSG00000081665.9	ZNF506	0.628007	0.0514149	0.837149	4.86702
ENSG00000081692.8	JMJD4	-0.0634996	0.8429	0.999924	3.4564
ENSG00000081721.7	DUSP12	-0.341445	0.235567	0.999924	5.08842
ENSG00000081760.12	AACS	-0.118647	0.604803	0.999924	6.82258
ENSG00000081791.4	KIAA0141	0.315667	0.212608	0.999924	6.36087
ENSG00000081803.11	CADPS2	-0.318499	0.583481	0.999924	5.72483
ENSG00000081818.1	PCDHB4	0.953788	0.098567	0.939186	0.851068
ENSG00000081842.13	PCDHA6	1.32086	0.000953068	0.283957	1.57982
ENSG00000081853.13	PCDHGA2	0.105056	0.834545	0.999924	0.983452
ENSG00000081870.7	HSPB11	0.100485	0.743676	0.999924	4.3605
ENSG00000081913.9	PHLPP1	-0.166826	0.526832	0.999924	4.89454
ENSG00000081923.6	ATP8B1	0.109609	0.717826	0.999924	5.90904
ENSG00000081985.6	IL12RB2	0.775618	0.193082	0.999924	-0.0881764
ENSG00000082014.12	SMARCD3	0.630998	0.254871	0.999924	4.5156
ENSG00000082068.4	WDR70	0.336739	0.237039	0.999924	5.42382
ENSG00000082146.8	STRADB	0.301479	0.387858	0.999924	3.53938
ENSG00000082153.13	BZW1	-0.147411	0.673531	0.999924	6.48937
ENSG00000082175.10	PGR	0.466929	0.405533	0.999924	-0.354854
ENSG00000082196.16	C1QTNF3	0.579545	0.230457	0.999924	1.15593
ENSG00000082212.7	ME2	0.22986	0.443347	0.999924	6.03065
ENSG00000082213.13	C5orf22	-0.0441251	0.850726	0.999924	6.03289
ENSG00000082258.8	CCNT2	0.291743	0.168896	0.999924	5.26701
ENSG00000082269.12	FAM135A	-0.0478686	0.884193	0.999924	5.23432
ENSG00000082293.8	COL19A1	-0.185632	0.773161	0.999924	-0.199669
ENSG00000082397.11	EPB41L3	-1.73095	0.0389969	0.763942	-0.93601
ENSG00000082438.11	COBLL1	0.210293	0.396041	0.999924	6.26273
ENSG00000082458.7	DLG3	-0.192603	0.619327	0.999924	6.76397
ENSG00000082482.9	KCNK2	1.83764	0.10686	0.948114	-0.705062
ENSG00000082497.7	SERTAD4	-1.33444	0.0789867	0.910344	-0.57979
ENSG00000082512.10	TRAF5	0.269966	0.557424	0.999924	3.63273
ENSG00000082515.12	MRPL22	-0.00571073	0.983465	0.999924	4.39301
ENSG00000082516.8	GEMIN5	-0.117374	0.665392	0.999924	5.66742
ENSG00000082641.11	NFE2L1	-0.289911	0.410915	0.999924	7.90766
ENSG00000082684.10	SEMA5B	0.333691	0.652914	0.999924	-0.910156
ENSG00000082701.10	GSK3B	0.0239227	0.908776	0.999924	7.53966
ENSG00000082781.7	ITGB5	-0.357794	0.30575	0.999924	6.91036
ENSG00000082805.15	ERC1	0.147881	0.535028	0.999924	5.87566
ENSG00000082898.12	XPO1	-0.0149252	0.941128	0.999924	8.36357
ENSG00000082996.15	RNF13	-0.139051	0.584912	0.999924	5.38113
ENSG00000083093.5	PALB2	-0.116665	0.639266	0.999924	4.11548
ENSG00000083097.10	DOPEY1	0.324725	0.448895	0.999924	5.63224
ENSG00000083099.6	LYRM2	-0.160896	0.502762	0.999924	5.69645
ENSG00000083123.10	BCKDHB	-0.0723997	0.804151	0.999924	5.1895
ENSG00000083168.5	KAT6A	-0.230877	0.292962	0.999924	7.41455
ENSG00000083223.13	ZCCHC6	-0.0894328	0.771382	0.999924	5.66557
ENSG00000083290.15	ULK2	-0.172897	0.564711	0.999924	5.28601
ENSG00000083307.6	GRHL2	-0.145303	0.655715	0.999924	7.32596
ENSG00000083312.13	TNPO1	0.189293	0.386817	0.999924	8.01612
ENSG00000083444.12	PLOD1	0.11359	0.703149	0.999924	5.63444
ENSG00000083454.17	P2RX5	0.24119	0.361418	0.999924	3.63966
ENSG00000083457.7	ITGAE	-0.174991	0.640563	0.999924	3.95648
ENSG00000083520.10	DIS3	0.107677	0.632913	0.999924	6.54852
ENSG00000083535.11	PIBF1	-0.039157	0.887795	0.999924	4.80363
ENSG00000083544.9	TDRD3	0.0885999	0.6957	0.999924	5.03929
ENSG00000083635.7	NUFIP1	-0.036917	0.912517	0.999924	3.78419
ENSG00000083642.14	PDS5B	-0.400124	0.255264	0.999924	4.51673
ENSG00000083720.8	OXCT1	0.11278	0.745737	0.999924	7.33094
ENSG00000083750.8	RRAGB	0.0310475	0.921233	0.999924	3.68307
ENSG00000083782.3	EPYC	1.6117	0.0564765	0.860158	-0.612554
ENSG00000083799.13	CYLD	-0.302408	0.423962	0.999924	4.94871
ENSG00000083807.5	SLC27A5	0.159763	0.580132	0.999924	3.89419
ENSG00000083812.7	ZNF324	-0.110606	0.707246	0.999924	4.60417
ENSG00000083814.8	ZNF671	0.740407	0.171717	0.999924	1.23878
ENSG00000083817.8	ZNF416	-0.185457	0.532037	0.999924	2.56673
ENSG00000083828.11	ZNF586	-0.00505709	0.983891	0.999924	4.22769
ENSG00000083838.11	ZNF446	-0.0616002	0.820609	0.999924	4.37418
ENSG00000083844.6	ZNF264	-0.225401	0.357971	0.999924	4.16437
ENSG00000083845.4	RPS5	0.216008	0.522662	0.999924	9.16415
ENSG00000083857.9	FAT1	-0.475727	0.118921	0.962094	7.28777
ENSG00000083896.8	YTHDC1	-0.0053186	0.97992	0.999924	6.73406
ENSG00000083937.4	CHMP2B	-0.180558	0.42588	0.999924	6.71137
ENSG00000084070.7	SMAP2	-0.289624	0.31776	0.999924	5.90256
ENSG00000084072.12	PPIE	0.0681724	0.807958	0.999924	4.9906
ENSG00000084073.4	ZMPSTE24	-0.128105	0.652461	0.999924	6.62134
ENSG00000084090.9	STARD7	-0.0601104	0.804678	0.999924	7.57667
ENSG00000084092.6	NOA1	0.115945	0.636273	0.999924	6.10773
ENSG00000084093.11	REST	-0.0405576	0.877118	0.999924	6.75845
ENSG00000084112.10	SSH1	-0.0217714	0.934533	0.999924	6.18321
ENSG00000084234.12	APLP2	0.0169902	0.951419	0.999924	8.93546
ENSG00000084444.9	KIAA1467	0.0616737	0.883263	0.999924	6.99875
ENSG00000084453.12	SLCO1A2	0.651305	0.269349	0.999924	1.65564
ENSG00000084463.3	WBP11	-0.152677	0.568706	0.999924	7.24943
ENSG00000084623.7	EIF3I	0.0490627	0.846811	0.999924	7.60855
ENSG00000084628.5	NKAIN1	-0.0820659	0.855824	0.999924	3.41671
ENSG00000084636.13	COL16A1	-0.818735	0.366444	0.999924	2.83805
ENSG00000084652.11	TXLNA	-0.203842	0.320228	0.999924	7.04408
ENSG00000084674.9	APOB	0.0130074	0.987706	0.999924	-0.50122
ENSG00000084676.11	NCOA1	-0.274483	0.320738	0.999924	5.58245
ENSG00000084693.11	AGBL5	0.12959	0.590058	0.999924	6.17677
ENSG00000084710.9	EFR3B	0.303309	0.549236	0.999924	1.38306
ENSG00000084731.9	KIF3C	0.713048	0.0372145	0.754955	3.91618
ENSG00000084733.6	RAB10	0.0665044	0.758167	0.999924	7.79692
ENSG00000084754.6	HADHA	0.080671	0.685742	0.999924	8.26812
ENSG00000084764.6	MAPRE3	0.0833192	0.806664	0.999924	4.69115
ENSG00000084774.9	CAD	0.154178	0.497879	0.999924	7.33642
ENSG00000085063.10	CD59	-0.0274661	0.920766	0.999924	5.57633
ENSG00000085117.7	CD82	0.262812	0.528581	0.999924	2.13273
ENSG00000085185.11	BCORL1	0.0397741	0.888696	0.999924	6.40506
ENSG00000085224.16	ATRX	0.194502	0.458966	0.999924	7.80328
ENSG00000085231.9	TAF9	0.0370993	0.868409	0.999924	6.57086
ENSG00000085274.11	MYNN	0.0924786	0.774604	0.999924	6.59967
ENSG00000085276.13	MECOM	0.257184	0.457041	0.999924	4.19976
ENSG00000085365.13	SCAMP1	0.102099	0.623855	0.999924	7.03098
ENSG00000085377.9	PREP	-0.0435367	0.851605	0.999924	5.27091
ENSG00000085382.7	HACE1	-0.229037	0.403866	0.999924	5.03858
ENSG00000085415.11	SEH1L	-0.0328367	0.900205	0.999924	6.28873
ENSG00000085433.11	WDR47	0.00463596	0.98593	0.999924	4.41736
ENSG00000085449.10	WDFY1	0.0906026	0.698497	0.999924	5.9694
ENSG00000085465.11	OVGP1	0.256731	0.636823	0.999924	2.31744
ENSG00000085491.11	SLC25A24	0.0333018	0.898618	0.999924	4.52103
ENSG00000085511.15	MAP3K4	-0.113598	0.674025	0.999924	5.22374
ENSG00000085514.11	PILRA	0.534467	0.477754	0.999924	1.15552
ENSG00000085552.12	IGSF9	0.643561	0.150967	0.999924	5.67697
ENSG00000085563.10	ABCB1	-0.170443	0.804815	0.999924	-0.0771281
ENSG00000085644.9	ZNF213	0.155979	0.561471	0.999924	5.01354
ENSG00000085719.7	CPNE3	-0.195493	0.333822	0.999924	7.31004
ENSG00000085721.8	RRN3	-0.0751495	0.742858	0.999924	6.1474
ENSG00000085733.11	CTTN	0.0946449	0.658415	0.999924	8.24926
ENSG00000085741.8	WNT11	-1.36619	0.085462	0.928523	-0.471852
ENSG00000085760.10	MTIF2	-0.0423217	0.871695	0.999924	5.32758
ENSG00000085788.9	DDHD2	0.0763427	0.725084	0.999924	6.13424
ENSG00000085831.11	TTC39A	0.360982	0.317509	0.999924	5.90341
ENSG00000085832.12	EPS15	0.033274	0.880496	0.999924	6.72607
ENSG00000085840.8	ORC1	-0.669926	0.247308	0.999924	4.69526
ENSG00000085871.4	MGST2	0.343375	0.356865	0.999924	5.12962
ENSG00000085872.10	CHERP	-0.0328884	0.876797	0.999924	6.43861
ENSG00000085978.17	ATG16L1	-0.0422609	0.87871	0.999924	4.98163
ENSG00000085982.9	USP40	-0.0647305	0.787889	0.999924	6.20973
ENSG00000085998.9	POMGNT1	0.0289273	0.900796	0.999924	7.54927
ENSG00000085999.7	RAD54L	-0.548226	0.274251	0.999924	4.38189
ENSG00000086015.16	MAST2	0.368364	0.270274	0.999924	7.50343
ENSG00000086061.11	DNAJA1	-0.0544367	0.844024	0.999924	8.29095
ENSG00000086062.8	B4GALT1	-0.262353	0.428615	0.999924	6.78936
ENSG00000086065.9	CHMP5	0.0159012	0.94121	0.999924	6.4252
ENSG00000086102.14	NFX1	0.0932043	0.674401	0.999924	7.2792
ENSG00000086159.8	AQP6	0.525317	0.530045	0.999924	-0.938369
ENSG00000086189.5	DIMT1	-0.0442397	0.862069	0.999924	5.83949
ENSG00000086200.12	IPO11	-0.146298	0.652297	0.999924	4.70659
ENSG00000086205.12	FOLH1	0.359257	0.490411	0.999924	8.119
ENSG00000086232.8	EIF2AK1	0.268507	0.340249	0.999924	8.05326
ENSG00000086289.7	EPDR1	-0.45464	0.345791	0.999924	5.26397
ENSG00000086300.11	SNX10	0.0422228	0.940316	0.999924	3.65076
ENSG00000086475.10	SEPHS1	-0.0192927	0.939667	0.999924	6.11892
ENSG00000086504.11	MRPL28	0.0846005	0.758096	0.999924	5.97219
ENSG00000086506.2	HBQ1	0.0888569	0.852096	0.999924	2.6284
ENSG00000086544.2	ITPKC	0.0107229	0.978921	0.999924	5.39997
ENSG00000086548.8	CEACAM6	1.02953	0.403668	0.999924	2.20092
ENSG00000086570.8	FAT2	0.505481	0.253355	0.999924	0.883276
ENSG00000086589.7	RBM22	-0.373422	0.0960351	0.934969	6.1718
ENSG00000086598.6	TMED2	-0.0346856	0.895974	0.999924	9.01687
ENSG00000086619.9	ERO1LB	-0.334349	0.506167	0.999924	3.54086
ENSG00000086666.14	ZFAND6	0.316609	0.13266	0.982477	5.51925
ENSG00000086712.8	TXLNG	0.615247	0.0636025	0.868221	5.57061
ENSG00000086717.14	PPEF1	0.755798	0.249529	0.999924	-0.564773
ENSG00000086730.12	LAT2	-0.650152	0.335392	0.999924	4.03495
ENSG00000086758.11	HUWE1	0.10013	0.632581	0.999924	8.77557
ENSG00000086827.4	ZW10	-0.198279	0.477512	0.999924	5.32233
ENSG00000086848.10	ALG9	-0.189476	0.513912	0.999924	4.09981
ENSG00000086967.9	MYBPC2	-0.688436	0.358182	0.999924	-0.515194
ENSG00000087008.11	ACOX3	0.442316	0.141165	0.995164	3.01967
ENSG00000087053.14	MTMR2	0.421153	0.0972911	0.936518	5.96135
ENSG00000087074.7	PPP1R15A	-1.22663	0.0664384	0.873827	6.80235
ENSG00000087076.4	HSD17B14	0.859829	0.111344	0.953514	0.98361
ENSG00000087077.7	TRIP6	0.884196	0.0640118	0.868851	4.08759
ENSG00000087085.9	ACHE	0.532041	0.42911	0.999924	3.9514
ENSG00000087086.9	FTL	0.680504	0.00935151	0.509122	8.17801
ENSG00000087087.14	SRRT	-0.0966779	0.700217	0.999924	7.83701
ENSG00000087088.15	BAX	-0.000589475	0.998529	0.999924	6.13575
ENSG00000087095.8	NLK	0.127652	0.579099	0.999924	5.02206
ENSG00000087111.16	PIGS	-0.204422	0.36176	0.999924	6.97171
ENSG00000087152.11	ATXN7L3	0.113565	0.584483	0.999924	6.30405
ENSG00000087157.14	PGS1	0.182981	0.545534	0.999924	4.12176
ENSG00000087191.8	PSMC5	-0.135338	0.620821	0.999924	6.96129
ENSG00000087206.12	UIMC1	0.0389605	0.877854	0.999924	5.26609
ENSG00000087253.7	LPCAT2	0.791702	0.291102	0.999924	0.953077
ENSG00000087258.9	GNAO1	-0.747999	0.243707	0.999924	1.03344
ENSG00000087263.12	OGFOD1	-0.098335	0.634427	0.999924	5.93655
ENSG00000087266.11	SH3BP2	0.170231	0.496097	0.999924	7.25752
ENSG00000087269.11	NOP14	0.0751805	0.704542	0.999924	6.83145
ENSG00000087274.12	ADD1	0.134574	0.53885	0.999924	7.88222
ENSG00000087299.7	L2HGDH	-0.190727	0.514605	0.999924	4.49915
ENSG00000087301.4	TXNDC16	-0.234923	0.486362	0.999924	6.18977
ENSG00000087302.4	C14orf166	0.183741	0.434316	0.999924	6.33994
ENSG00000087303.12	NID2	-0.47823	0.337812	0.999924	2.10943
ENSG00000087338.4	GMCL1	-0.128289	0.613493	0.999924	5.5145
ENSG00000087365.10	SF3B2	-0.110495	0.61876	0.999924	8.31437
ENSG00000087448.5	KLHL42	-0.172227	0.439179	0.999924	6.83746
ENSG00000087460.19	GNAS	0.0501178	0.817149	0.999924	9.28379
ENSG00000087470.13	DNM1L	-0.0677979	0.728538	0.999924	7.60046
ENSG00000087494.11	PTHLH	-1.92822	0.00310272	0.401769	1.2341
ENSG00000087502.13	ERGIC2	-0.00769351	0.973648	0.999924	6.50004
ENSG00000087510.5	TFAP2C	-2.15461	0.0100309	0.526939	-0.540542
ENSG00000087586.13	AURKA	-0.253663	0.685125	0.999924	5.14079
ENSG00000087842.6	PIR	0.0829565	0.849699	0.999924	4.36792
ENSG00000087884.10	AAMDC	-0.440211	0.365115	0.999924	0.437306
ENSG00000087903.8	RFX2	0.319567	0.412108	0.999924	2.52698
ENSG00000087995.11	METTL2A	0.120837	0.602252	0.999924	4.49151
ENSG00000088002.7	SULT2B1	-1.01519	0.124832	0.972953	0.311752
ENSG00000088035.11	ALG6	-0.0770383	0.815709	0.999924	4.40303
ENSG00000088038.13	CNOT3	-0.0630324	0.768119	0.999924	6.6602
ENSG00000088179.4	PTPN4	0.160002	0.634122	0.999924	4.10595
ENSG00000088205.8	DDX18	-0.0494369	0.82021	0.999924	6.06885
ENSG00000088247.11	KHSRP	-0.113952	0.644819	0.999924	8.67808
ENSG00000088256.4	GNA11	-0.167905	0.427862	0.999924	6.61242
ENSG00000088280.14	ASAP3	0.0934691	0.760741	0.999924	4.38885
ENSG00000088298.8	EDEM2	-0.0627889	0.836916	0.999924	4.87416
ENSG00000088305.14	DNMT3B	0.0547322	0.8636	0.999924	4.01538
ENSG00000088325.11	TPX2	-0.423639	0.488282	0.999924	7.38426
ENSG00000088340.11	FER1L4	-0.213429	0.763042	0.999924	1.96958
ENSG00000088356.4	PDRG1	0.0983668	0.745304	0.999924	4.76851
ENSG00000088367.16	EPB41L1	-0.155585	0.652735	0.999924	5.55686
ENSG00000088386.11	SLC15A1	0.269164	0.660241	0.999924	-0.693112
ENSG00000088387.13	DOCK9	-0.23963	0.342189	0.999924	5.44504
ENSG00000088448.10	ANKRD10	0.247898	0.452304	0.999924	5.34828
ENSG00000088451.6	TGDS	0.0390945	0.879829	0.999924	4.35674
ENSG00000088538.12	DOCK3	0.0542444	0.890703	0.999924	6.25886
ENSG00000088543.10	C3orf18	0.702433	0.107694	0.948114	1.56896
ENSG00000088682.9	COQ9	0.122394	0.597295	0.999924	6.04753
ENSG00000088727.8	KIF9	0.0319936	0.922656	0.999924	3.33899
ENSG00000088756.8	ARHGAP28	1.31198	0.0692789	0.883301	-0.164983
ENSG00000088766.7	CRLS1	0.0559854	0.808678	0.999924	5.96095
ENSG00000088808.12	PPP1R13B	0.112696	0.61297	0.999924	5.8484
ENSG00000088812.13	ATRN	-0.0693369	0.841784	0.999924	6.43594
ENSG00000088826.13	SMOX	-0.571802	0.229834	0.999924	2.15086
ENSG00000088832.10	FKBP1A	0.128158	0.563815	0.999924	6.63557
ENSG00000088833.13	NSFL1C	-0.179462	0.505287	0.999924	6.31501
ENSG00000088836.8	SLC4A11	0.287152	0.54145	0.999924	3.91904
ENSG00000088854.11	C20orf194	0.829856	0.132272	0.982477	2.30327
ENSG00000088876.7	ZNF343	0.329303	0.178193	0.999924	4.0724
ENSG00000088881.16	EBF4	-0.236694	0.707486	0.999924	2.23706
ENSG00000088888.13	MAVS	0.100101	0.748154	0.999924	5.90255
ENSG00000088899.10	LZTS3	0.270219	0.46304	0.999924	2.79026
ENSG00000088930.6	XRN2	0.0244457	0.913457	0.999924	7.46743
ENSG00000088970.11	PLK1S1	-0.118092	0.749544	0.999924	3.08897
ENSG00000088986.6	DYNLL1	-0.434862	0.273201	0.999924	7.47549
ENSG00000088992.13	TESC	0.260151	0.694157	0.999924	0.530376
ENSG00000089006.12	SNX5	0.113176	0.631573	0.999924	6.36112
ENSG00000089009.11	RPL6	0.200294	0.492452	0.999924	7.68291
ENSG00000089022.9	MAPKAPK5	-0.0928844	0.64272	0.999924	6.21714
ENSG00000089041.12	P2RX7	-0.353557	0.471137	0.999924	2.11346
ENSG00000089048.10	ESF1	0.127002	0.569133	0.999924	5.88437
ENSG00000089050.10	RBBP9	-0.292306	0.33093	0.999924	5.7287
ENSG00000089053.8	ANAPC5	0.00755137	0.971582	0.999924	8.18045
ENSG00000089057.10	SLC23A2	0.0579521	0.896766	0.999924	5.2977
ENSG00000089060.7	SLC8B1	0.0981622	0.745536	0.999924	2.91632
ENSG00000089063.10	TMEM230	0.0789016	0.739168	0.999924	5.80021
ENSG00000089091.12	DZANK1	0.778794	0.0998368	0.942735	2.66717
ENSG00000089094.12	KDM2B	0.00274184	0.990423	0.999924	5.78365
ENSG00000089101.13	C20orf26	0.195296	0.798017	0.999924	-0.582067
ENSG00000089116.3	LHX5	-0.70851	0.315318	0.999924	0.186
ENSG00000089123.11	TASP1	-0.0951115	0.74044	0.999924	3.76852
ENSG00000089154.6	GCN1L1	0.0743395	0.740206	0.999924	8.53321
ENSG00000089157.11	RPLP0	0.0903068	0.777582	0.999924	10.0701
ENSG00000089159.11	PXN	-0.08706	0.72585	0.999924	6.02087
ENSG00000089163.4	SIRT4	0.0057036	0.990921	0.999924	0.544765
ENSG00000089177.13	KIF16B	0.0504063	0.85072	0.999924	5.68594
ENSG00000089195.10	TRMT6	-0.240962	0.319575	0.999924	5.85774
ENSG00000089199.5	CHGB	0.286518	0.450176	0.999924	6.07134
ENSG00000089220.4	PEBP1	0.0396386	0.85496	0.999924	8.84107
ENSG00000089234.11	BRAP	0.098142	0.631957	0.999924	5.76371
ENSG00000089248.6	ERP29	0.09581	0.632547	0.999924	7.65767
ENSG00000089280.14	FUS	-0.271322	0.357271	0.999924	8.25136
ENSG00000089289.11	IGBP1	0.356465	0.32287	0.999924	5.29073
ENSG00000089335.16	ZNF302	0.12438	0.736494	0.999924	4.72271
ENSG00000089351.10	GRAMD1A	0.924142	0.0842026	0.926195	4.2423
ENSG00000089356.12	FXYD3	0.0997292	0.821957	0.999924	6.53808
ENSG00000089486.12	CDIP1	0.312394	0.221091	0.999924	4.76912
ENSG00000089505.13	CMTM1	-0.374571	0.242118	0.999924	2.07512
ENSG00000089558.4	KCNH4	0.060029	0.893915	0.999924	1.83979
ENSG00000089597.12	GANAB	-0.0572311	0.810261	0.999924	9.03871
ENSG00000089639.6	GMIP	0.666635	0.043194	0.791045	4.33616
ENSG00000089682.12	RBM41	0.0830106	0.729884	0.999924	5.23657
ENSG00000089685.10	BIRC5	-0.250365	0.719938	0.999924	5.29401
ENSG00000089692.4	LAG3	-0.45923	0.342819	0.999924	1.46021
ENSG00000089693.6	MLF2	-0.0470937	0.827885	0.999924	8.88516
ENSG00000089723.5	OTUB2	0.328207	0.45152	0.999924	2.90484
ENSG00000089737.11	DDX24	-0.159164	0.554359	0.999924	7.78336
ENSG00000089775.7	ZBTB25	0.210811	0.517489	0.999924	4.74707
ENSG00000089818.12	NECAP1	-0.269586	0.261969	0.999924	6.47784
ENSG00000089820.11	ARHGAP4	-0.195883	0.697452	0.999924	1.36029
ENSG00000089847.8	ANKRD24	0.135271	0.70305	0.999924	5.06568
ENSG00000089876.7	DHX32	0.0987471	0.800456	0.999924	5.20174
ENSG00000089902.8	RCOR1	-0.226918	0.312659	0.999924	5.9388
ENSG00000089916.13	GPATCH2L	0.0871535	0.738308	0.999924	6.40649
ENSG00000090006.13	LTBP4	-0.110104	0.715273	0.999924	6.48426
ENSG00000090013.5	BLVRB	-0.123789	0.778644	0.999924	5.63303
ENSG00000090020.6	SLC9A1	-0.232247	0.519044	0.999924	7.46158
ENSG00000090054.9	SPTLC1	0.119049	0.581637	0.999924	5.53183
ENSG00000090060.13	PAPOLA	0.0504467	0.790052	0.999924	8.18047
ENSG00000090061.13	CCNK	-0.12785	0.5286	0.999924	6.04535
ENSG00000090097.16	PCBP4	0.178	0.538762	0.999924	5.27624
ENSG00000090104.7	RGS1	0.1364	0.868116	0.999924	1.58229
ENSG00000090238.7	YPEL3	0.176913	0.693817	0.999924	3.60416
ENSG00000090263.11	MRPS33	0.334937	0.187597	0.999924	5.99515
ENSG00000090266.8	NDUFB2	0.27326	0.368449	0.999924	6.38491
ENSG00000090273.9	NUDC	0.0403538	0.877069	0.999924	6.93538
ENSG00000090316.11	MAEA	0.12362	0.53269	0.999924	6.61282
ENSG00000090339.4	ICAM1	1.38339	0.00563	0.43897	1.21414
ENSG00000090372.10	STRN4	-0.0141639	0.952182	0.999924	7.15476
ENSG00000090376.4	IRAK3	-0.328914	0.695318	0.999924	-0.693793
ENSG00000090402.3	SI	0.740655	0.365033	0.999924	3.76527
ENSG00000090432.5	MUL1	-0.209311	0.47794	0.999924	4.86083
ENSG00000090447.7	TFAP4	0.174994	0.479062	0.999924	5.67265
ENSG00000090470.10	PDCD7	0.171087	0.452795	0.999924	5.14722
ENSG00000090487.6	SPG21	0.201133	0.381047	0.999924	6.27246
ENSG00000090520.6	DNAJB11	-0.601667	0.146389	0.999305	6.73963
ENSG00000090530.5	LEPREL1	0.858078	0.231105	0.999924	-0.611435
ENSG00000090539.11	CHRD	-1.21885	0.0290615	0.696334	1.06314
ENSG00000090565.11	RAB11FIP3	0.126422	0.615219	0.999924	6.83394
ENSG00000090581.5	GNPTG	0.0960569	0.767613	0.999924	5.21597
ENSG00000090612.16	ZNF268	-0.0333281	0.894023	0.999924	5.36899
ENSG00000090615.8	GOLGA3	-0.122572	0.571393	0.999924	7.80202
ENSG00000090621.9	PABPC4	-0.114268	0.693253	0.999924	7.36343
ENSG00000090661.7	CERS4	1.26778	0.109728	0.95237	2.97228
ENSG00000090674.11	MCOLN1	-0.125255	0.7419	0.999924	4.77628
ENSG00000090686.11	USP48	0.188366	0.390093	0.999924	6.61502
ENSG00000090776.5	EFNB1	0.122999	0.630633	0.999924	3.55412
ENSG00000090857.9	PDPR	0.132296	0.601465	0.999924	5.43637
ENSG00000090861.11	AARS	-0.399488	0.237564	0.999924	8.38258
ENSG00000090863.7	GLG1	0.123305	0.606822	0.999924	6.9369
ENSG00000090889.10	KIF4A	-0.418233	0.50762	0.999924	5.83787
ENSG00000090905.13	TNRC6A	0.313823	0.164443	0.999924	6.60984
ENSG00000090920.9	FCGBP	0.968972	0.165117	0.999924	2.18489
ENSG00000090924.10	PLEKHG2	0.167828	0.732547	0.999924	4.47986
ENSG00000090932.6	DLL3	-0.804721	0.21242	0.999924	0.583352
ENSG00000090971.4	NAT14	0.176733	0.54553	0.999924	3.89477
ENSG00000090975.8	PITPNM2	-0.128801	0.685329	0.999924	4.61253
ENSG00000090989.13	EXOC1	0.158724	0.459205	0.999924	5.68573
ENSG00000091009.6	RBM27	0.105173	0.614119	0.999924	6.68015
ENSG00000091039.12	OSBPL8	-0.507669	0.225383	0.999924	8.73252
ENSG00000091073.15	DTX2	0.308684	0.481893	0.999924	2.02366
ENSG00000091106.14	NLRC4	0.210873	0.669976	0.999924	0.361013
ENSG00000091127.9	PUS7	0.119749	0.685298	0.999924	6.5486
ENSG00000091128.8	LAMB4	0.830045	0.159182	0.999924	-0.390628
ENSG00000091129.15	NRCAM	-0.0820294	0.850323	0.999924	2.94122
ENSG00000091136.9	LAMB1	0.978396	0.00184836	0.362181	5.51298
ENSG00000091137.7	SLC26A4	0.314154	0.62844	0.999924	0.608683
ENSG00000091138.8	SLC26A3	0.335201	0.64717	0.999924	2.55108
ENSG00000091140.8	DLD	0.103027	0.754101	0.999924	7.37457
ENSG00000091157.9	WDR7	-0.339871	0.24008	0.999924	4.99268
ENSG00000091164.8	TXNL1	-0.0863024	0.698071	0.999924	6.44774
ENSG00000091262.10	ABCC6	0.721197	0.100068	0.942907	2.29625
ENSG00000091317.7	CMTM6	0.155799	0.582791	0.999924	6.69672
ENSG00000091409.10	ITGA6	0.832734	0.0334481	0.723392	2.27001
ENSG00000091428.13	RAPGEF4	1.49974	0.0690733	0.88274	-0.438754
ENSG00000091436.12	MLTK	-0.501089	0.176789	0.999924	4.13808
ENSG00000091483.6	FH	-0.0750479	0.811241	0.999924	7.39044
ENSG00000091490.6	SEL1L3	0.0128187	0.978179	0.999924	5.74848
ENSG00000091513.10	TF	2.08164	0.0048806	0.427777	0.171269
ENSG00000091527.11	CDV3	-0.117911	0.607281	0.999924	7.35609
ENSG00000091536.12	MYO15A	-0.231617	0.656743	0.999924	1.39412
ENSG00000091542.8	ALKBH5	0.0547341	0.809599	0.999924	6.44518
ENSG00000091583.6	APOH	1.89356	0.0255449	0.673717	0.925124
ENSG00000091592.11	NLRP1	1.21358	0.0293304	0.696741	5.85172
ENSG00000091622.11	PITPNM3	0.179704	0.618963	0.999924	2.95413
ENSG00000091640.3	SPAG7	0.0451268	0.84452	0.999924	5.85332
ENSG00000091651.4	ORC6	-0.300941	0.543891	0.999924	5.25034
ENSG00000091656.11	ZFHX4	-0.349902	0.2866	0.999924	3.99161
ENSG00000091664.7	SLC17A6	-1.35746	0.173453	0.999924	0.460442
ENSG00000091732.11	ZC3HC1	0.233561	0.375246	0.999924	4.67298
ENSG00000091844.3	RGS17	0.223396	0.616844	0.999924	2.22658
ENSG00000091879.9	ANGPT2	0.0387684	0.953568	0.999924	-0.355192
ENSG00000091947.5	TMEM101	-0.0666864	0.813406	0.999924	4.67657
ENSG00000091986.11	CCDC80	-0.741681	0.198144	0.999924	0.684588
ENSG00000092010.10	PSME1	-0.221949	0.545745	0.999924	6.46294
ENSG00000092020.6	PPP2R3C	-0.0298114	0.933178	0.999924	4.47677
ENSG00000092036.12	HAUS4	-0.206787	0.506183	0.999924	3.9822
ENSG00000092051.12	JPH4	0.170164	0.819867	0.999924	-0.923933
ENSG00000092068.14	SLC7A8	0.418714	0.41828	0.999924	4.36702
ENSG00000092094.6	OSGEP	-0.177419	0.512656	0.999924	5.16594
ENSG00000092096.10	SLC22A17	-0.195734	0.668228	0.999924	2.2543
ENSG00000092098.12	RNF31	-0.0424177	0.853832	0.999924	4.84228
ENSG00000092108.16	SCFD1	0.00531914	0.982496	0.999924	5.98202
ENSG00000092140.10	G2E3	-0.240046	0.520189	0.999924	4.82646
ENSG00000092148.8	HECTD1	-0.0480717	0.809278	0.999924	7.86836
ENSG00000092199.13	HNRNPC	0.0543415	0.798544	0.999924	8.56272
ENSG00000092200.8	RPGRIP1	-0.673467	0.156143	0.999924	0.690458
ENSG00000092201.5	SUPT16H	-0.0266333	0.908837	0.999924	8.27403
ENSG00000092203.9	TOX4	-0.0836938	0.688231	0.999924	6.23594
ENSG00000092208.12	GEMIN2	-0.199747	0.575084	0.999924	4.12767
ENSG00000092295.7	TGM1	0.747064	0.059468	0.863497	2.4891
ENSG00000092330.11	TINF2	-0.185741	0.467644	0.999924	5.21059
ENSG00000092377.9	TBL1Y	0.875457	0.165114	0.999924	-0.407853
ENSG00000092421.12	SEMA6A	0.192083	0.570931	0.999924	8.94865
ENSG00000092439.9	TRPM7	0.158961	0.574459	0.999924	6.67296
ENSG00000092445.7	TYRO3	0.0372646	0.89768	0.999924	5.35667
ENSG00000092470.7	WDR76	-0.594179	0.286974	0.999924	5.32111
ENSG00000092531.5	SNAP23	0.254069	0.393153	0.999924	4.73438
ENSG00000092607.9	TBX15	0.15263	0.854317	0.999924	0.083456
ENSG00000092621.7	PHGDH	-0.0768698	0.913933	0.999924	7.45244
ENSG00000092758.11	COL9A3	0.328263	0.677978	0.999924	4.26444
ENSG00000092820.13	EZR	-0.3068	0.381268	0.999924	7.49343
ENSG00000092841.14	MYL6	0.0218986	0.939144	0.999924	9.11893
ENSG00000092847.6	AGO1	0.14564	0.562481	0.999924	7.14635
ENSG00000092850.7	TEKT2	0.48803	0.552962	0.999924	-0.791345
ENSG00000092853.9	CLSPN	-0.630329	0.337265	0.999924	5.6435
ENSG00000092871.12	RFFL	0.0223474	0.934825	0.999924	4.0742
ENSG00000092929.7	UNC13D	0.814752	0.197953	0.999924	1.36083
ENSG00000092931.7	MFSD11	-0.0532431	0.858808	0.999924	4.50879
ENSG00000092964.12	DPYSL2	0.0189421	0.966247	0.999924	7.43137
ENSG00000092969.7	TGFB2	-0.695316	0.346367	0.999924	1.51342
ENSG00000092978.6	GPATCH2	-0.268051	0.217051	0.999924	5.54858
ENSG00000093000.14	NUP50	0.00793505	0.972275	0.999924	6.82921
ENSG00000093009.5	CDC45	-0.469974	0.434621	0.999924	5.99546
ENSG00000093010.7	COMT	-0.0773174	0.769206	0.999924	7.3595
ENSG00000093072.11	CECR1	-0.415894	0.506649	0.999924	6.42866
ENSG00000093100.13	XXbac-B461K10.4	0.81242	0.285525	0.999924	-0.741282
ENSG00000093144.14	ECHDC1	0.1058	0.611602	0.999924	4.73519
ENSG00000093167.13	LRRFIP2	-0.214505	0.321342	0.999924	5.6902
ENSG00000093183.9	SEC22C	-0.16175	0.499275	0.999924	6.23413
ENSG00000093217.5	XYLB	-0.204082	0.466274	0.999924	4.39174
ENSG00000094631.14	HDAC6	-0.0725977	0.758525	0.999924	5.61881
ENSG00000094804.5	CDC6	-0.675443	0.270682	0.999924	6.27346
ENSG00000094841.9	UPRT	-0.0998041	0.679771	0.999924	3.76882
ENSG00000094880.6	CDC23	-0.100357	0.659387	0.999924	6.09924
ENSG00000094914.8	AAAS	0.0486505	0.844165	0.999924	6.35757
ENSG00000094916.9	CBX5	-0.207281	0.497945	0.999924	9.52207
ENSG00000094975.9	SUCO	-0.266582	0.268804	0.999924	6.71471
ENSG00000095002.8	MSH2	-0.335118	0.341805	0.999924	5.89158
ENSG00000095015.5	MAP3K1	0.315642	0.234995	0.999924	4.73729
ENSG00000095059.11	DHPS	0.160781	0.462319	0.999924	6.21898
ENSG00000095066.7	HOOK2	0.206987	0.466197	0.999924	6.08027
ENSG00000095139.9	ARCN1	-0.142138	0.545386	0.999924	7.85287
ENSG00000095203.10	EPB41L4B	0.137785	0.618397	0.999924	5.68886
ENSG00000095209.7	TMEM38B	-0.0198554	0.945071	0.999924	6.00043
ENSG00000095261.9	PSMD5	0.0284946	0.902346	0.999924	5.85345
ENSG00000095303.10	PTGS1	0.193478	0.792071	0.999924	-0.525062
ENSG00000095319.10	NUP188	-0.0840117	0.785622	0.999924	7.75008
ENSG00000095321.12	CRAT	-0.0719306	0.769105	0.999924	6.45915
ENSG00000095370.15	SH2D3C	0.31122	0.723185	0.999924	-0.0284197
ENSG00000095380.10	NANS	-0.227019	0.445561	0.999924	5.24726
ENSG00000095383.15	TBC1D2	-0.319491	0.448716	0.999924	2.56807
ENSG00000095397.9	DFNB31	0.646144	0.287066	0.999924	3.17709
ENSG00000095464.9	PDE6C	0.408848	0.492153	0.999924	0.0271847
ENSG00000095485.12	CWF19L1	-0.0484873	0.856986	0.999924	4.56617
ENSG00000095539.11	SEMA4G	0.347098	0.436694	0.999924	4.75163
ENSG00000095564.9	BTAF1	0.118262	0.591963	0.999924	6.73474
ENSG00000095574.7	IKZF5	-0.230907	0.431034	0.999924	4.95604
ENSG00000095585.12	BLNK	1.08976	0.0197269	0.628359	2.7726
ENSG00000095587.8	TLL2	-0.0394571	0.952539	0.999924	1.03995
ENSG00000095637.16	SORBS1	-0.270277	0.665701	0.999924	4.25075
ENSG00000095739.7	BAMBI	-3.00686	0.00339565	0.411698	3.63494
ENSG00000095752.2	IL11	-0.0766131	0.90905	0.999924	1.4054
ENSG00000095787.17	WAC	0.133496	0.527921	0.999924	7.72672
ENSG00000095794.15	CREM	-0.456561	0.175998	0.999924	3.8809
ENSG00000095906.12	NUBP2	-0.117917	0.627586	0.999924	5.89528
ENSG00000095932.5	C19orf77	1.75608	0.00120846	0.300625	2.20863
ENSG00000095951.12	HIVEP1	0.265602	0.669638	0.999924	5.43193
ENSG00000096006.7	CRISP3	-1.38566	0.0488761	0.823721	1.34646
ENSG00000096060.10	FKBP5	-0.377055	0.462386	0.999924	9.35309
ENSG00000096063.10	SRPK1	0.108171	0.582649	0.999924	7.19389
ENSG00000096070.15	BRPF3	0.0634264	0.796376	0.999924	6.59487
ENSG00000096080.7	MRPS18A	0.249124	0.424986	0.999924	3.80468
ENSG00000096088.12	PGC	-1.26484	0.224082	0.999924	0.950518
ENSG00000096092.5	TMEM14A	-0.215834	0.506275	0.999924	4.68285
ENSG00000096093.10	EFHC1	-0.0879392	0.760863	0.999924	5.40532
ENSG00000096384.15	HSP90AB1	0.0831809	0.77296	0.999924	10.4178
ENSG00000096401.7	CDC5L	-0.1979	0.389055	0.999924	7.00205
ENSG00000096433.6	ITPR3	0.131244	0.649835	0.999924	6.89801
ENSG00000096654.11	ZNF184	-0.3263	0.280646	0.999924	3.95151
ENSG00000096696.9	DSP	0.805626	0.00669746	0.454744	7.68641
ENSG00000096717.7	SIRT1	0.0224964	0.937603	0.999924	5.4772
ENSG00000096746.13	HNRNPH3	0.0771761	0.72064	0.999924	7.6994
ENSG00000096872.11	IFT74	-0.0423168	0.881186	0.999924	5.28479
ENSG00000096968.8	JAK2	-0.0716445	0.791398	0.999924	4.48219
ENSG00000097007.13	ABL1	0.00775785	0.974107	0.999924	6.81669
ENSG00000097021.15	ACOT7	-0.62872	0.175109	0.999924	5.3014
ENSG00000097033.10	SH3GLB1	-0.157393	0.587665	0.999924	6.27345
ENSG00000097046.8	CDC7	-0.101854	0.814763	0.999924	5.01552
ENSG00000097096.8	SYDE2	-0.110726	0.761836	0.999924	3.77292
ENSG00000099194.5	SCD	-0.529776	0.49403	0.999924	8.92636
ENSG00000099203.2	TMED1	-0.114364	0.687603	0.999924	2.74225
ENSG00000099204.14	ABLIM1	0.252485	0.301216	0.999924	7.60286
ENSG00000099219.9	ERMP1	0.0737844	0.749212	0.999924	5.96449
ENSG00000099246.12	RAB18	-0.0573908	0.81429	0.999924	6.81334
ENSG00000099250.13	NRP1	-0.21167	0.639234	0.999924	4.61202
ENSG00000099251.10	HSD17B7P2	0.00538286	0.991875	0.999924	1.54816
ENSG00000099256.14	PRTFDC1	0.649862	0.311878	0.999924	2.68822
ENSG00000099260.6	PALMD	0.140995	0.772851	0.999924	3.30788
ENSG00000099282.5	TSPAN15	-0.267641	0.609349	0.999924	4.62153
ENSG00000099284.9	H2AFY2	0.242369	0.428787	0.999924	5.46029
ENSG00000099290.11	FAM21A	0.254415	0.467704	0.999924	2.35438
ENSG00000099308.6	MAST3	0.292741	0.279311	0.999924	4.62176
ENSG00000099326.4	MZF1	-0.0185146	0.95311	0.999924	5.5513
ENSG00000099330.4	OCEL1	0.183771	0.521086	0.999924	3.42492
ENSG00000099331.9	MYO9B	0.0820233	0.73341	0.999924	6.33038
ENSG00000099337.3	KCNK6	0.234773	0.675619	0.999924	0.369978
ENSG00000099338.18	CATSPERG	-0.0984847	0.872719	0.999924	2.2566
ENSG00000099341.7	PSMD8	-0.0833332	0.838078	0.999924	7.55619
ENSG00000099364.12	FBXL19	0.350395	0.195311	0.999924	4.87616
ENSG00000099365.5	STX1B	0.460821	0.700716	0.999924	-0.266698
ENSG00000099377.9	HSD3B7	-0.162553	0.604472	0.999924	4.95191
ENSG00000099381.12	SETD1A	-0.275187	0.207075	0.999924	6.25733
ENSG00000099385.7	BCL7C	0.00920509	0.975373	0.999924	5.21901
ENSG00000099617.2	EFNA2	0.296029	0.633438	0.999924	2.1998
ENSG00000099622.9	CIRBP	-0.0238586	0.930767	0.999924	7.68347
ENSG00000099624.3	ATP5D	0.092979	0.702646	0.999924	7.22374
ENSG00000099625.8	C19orf26	0.301723	0.415721	0.999924	4.35231
ENSG00000099715.10	PCDH11Y	-1.51661	0.0186303	0.623989	-0.0595584
ENSG00000099725.10	PRKY	0.176114	0.697906	0.999924	3.94366
ENSG00000099769.5	IGFALS	0.0585421	0.90106	0.999924	0.576861
ENSG00000099783.7	HNRNPM	-0.0926446	0.729411	0.999924	8.79306
ENSG00000099785.6	MARCH2	0.0955868	0.808785	0.999924	4.45324
ENSG00000099795.2	NDUFB7	0.115327	0.658188	0.999924	5.96637
ENSG00000099797.7	TECR	-0.341219	0.324436	0.999924	5.58849
ENSG00000099800.3	TIMM13	0.11331	0.684715	0.999924	5.8893
ENSG00000099804.4	CDC34	0.207795	0.384578	0.999924	5.62736
ENSG00000099810.14	MTAP	0.0244566	0.923691	0.999924	5.83755
ENSG00000099812.6	MISP	0.429123	0.471413	0.999924	3.92564
ENSG00000099814.11	CEP170B	0.0232652	0.921418	0.999924	7.67642
ENSG00000099817.7	POLR2E	-0.040906	0.869272	0.999924	7.00754
ENSG00000099821.9	POLRMT	0.0610185	0.7807	0.999924	6.03853
ENSG00000099822.2	HCN2	-0.111907	0.702691	0.999924	5.10368
ENSG00000099834.14	CDHR5	0.0786275	0.87344	0.999924	3.02535
ENSG00000099840.9	IZUMO4	0.410069	0.417736	0.999924	2.01279
ENSG00000099849.10	RASSF7	0.198296	0.436353	0.999924	5.72904
ENSG00000099860.4	GADD45B	-1.05736	0.207751	0.999924	5.09813
ENSG00000099864.13	PALM	0.726958	0.178016	0.999924	4.3613
ENSG00000099866.10	MADCAM1	0.901882	0.0956999	0.934969	0.801867
ENSG00000099875.10	MKNK2	0.0252417	0.927086	0.999924	7.71777
ENSG00000099889.9	ARVCF	0.310156	0.268909	0.999924	5.83605
ENSG00000099899.10	TRMT2A	0.221091	0.370839	0.999924	5.0256
ENSG00000099901.12	RANBP1	-0.220029	0.468167	0.999924	7.06796
ENSG00000099904.11	ZDHHC8	0.490439	0.189936	0.999924	5.46028
ENSG00000099910.12	KLHL22	-0.0392223	0.872556	0.999924	4.79711
ENSG00000099917.13	MED15	0.0843411	0.71274	0.999924	5.73288
ENSG00000099937.6	SERPIND1	-0.389355	0.632806	0.999924	-0.632027
ENSG00000099940.7	SNAP29	-0.211649	0.323162	0.999924	5.73962
ENSG00000099942.8	CRKL	-0.0404749	0.862799	0.999924	6.87084
ENSG00000099949.14	LZTR1	0.177566	0.529493	0.999924	6.27603
ENSG00000099953.5	MMP11	0.58305	0.212079	0.999924	1.89565
ENSG00000099954.14	CECR2	0.410419	0.429677	0.999924	2.20449
ENSG00000099956.13	SMARCB1	0.129592	0.595931	0.999924	7.1256
ENSG00000099957.12	P2RX6	0.367107	0.48777	0.999924	3.37474
ENSG00000099958.10	DERL3	-1.48173	0.0118769	0.546135	4.78552
ENSG00000099960.8	SLC7A4	0.10955	0.883996	0.999924	-0.428685
ENSG00000099968.13	BCL2L13	0.0894504	0.702724	0.999924	6.5722
ENSG00000099974.7	DDTL	0.579152	0.159691	0.999924	1.50293
ENSG00000099991.12	CABIN1	0.103385	0.665604	0.999924	6.78286
ENSG00000099992.11	TBC1D10A	-0.0278422	0.934364	0.999924	3.0588
ENSG00000099994.10	SUSD2	-0.360231	0.498974	0.999924	1.19488
ENSG00000099995.14	SF3A1	-0.123857	0.54986	0.999924	7.68974
ENSG00000099999.10	RNF215	0.164588	0.614657	0.999924	4.12737
ENSG00000100003.13	SEC14L2	0.0622259	0.8401	0.999924	3.48634
ENSG00000100014.15	SPECC1L	0.198939	0.427435	0.999924	5.43505
ENSG00000100023.13	PPIL2	0.160213	0.447501	0.999924	6.30245
ENSG00000100024.10	UPB1	-0.0159982	0.982014	0.999924	-0.432472
ENSG00000100027.10	YPEL1	0.827163	0.106757	0.948114	1.58971
ENSG00000100028.7	SNRPD3	-0.0226465	0.909523	0.999924	6.94785
ENSG00000100029.13	PES1	-0.009795	0.967936	0.999924	6.70013
ENSG00000100030.10	MAPK1	-0.0299366	0.890003	0.999924	7.72308
ENSG00000100031.14	GGT1	0.175763	0.670554	0.999924	4.92607
ENSG00000100033.12	PRODH	2.11338	0.000748707	0.266887	0.739396
ENSG00000100034.9	PPM1F	0.118503	0.642794	0.999924	5.45082
ENSG00000100036.11	SLC35E4	-0.147176	0.720775	0.999924	1.3236
ENSG00000100038.15	TOP3B	0.353083	0.250897	0.999924	4.77602
ENSG00000100056.7	DGCR14	-0.073201	0.769559	0.999924	4.58693
ENSG00000100058.8	CRYBB2P1	-0.069697	0.84212	0.999924	3.57795
ENSG00000100060.13	MFNG	0.929468	0.0411919	0.785361	1.15158
ENSG00000100065.10	CARD10	-0.0513871	0.90469	0.999924	5.09066
ENSG00000100068.7	LRP5L	0.475276	0.256764	0.999924	2.27757
ENSG00000100075.5	SLC25A1	-0.435055	0.175784	0.999924	7.39986
ENSG00000100077.10	ADRBK2	0.46462	0.0725071	0.890699	4.49298
ENSG00000100078.3	PLA2G3	-0.950805	0.112968	0.954307	6.99421
ENSG00000100083.14	GGA1	0.0792951	0.703214	0.999924	6.5121
ENSG00000100084.10	HIRA	0.0691974	0.775206	0.999924	4.46727
ENSG00000100092.16	SH3BP1	-0.0861529	0.805547	0.999924	4.54934
ENSG00000100097.7	LGALS1	-0.285081	0.720186	0.999924	5.78141
ENSG00000100099.16	HPS4	-0.150205	0.562731	0.999924	5.6591
ENSG00000100100.8	PIK3IP1	-0.0440782	0.918269	0.999924	4.28328
ENSG00000100101.13	NOL12	-0.0674969	0.783338	0.999924	4.85312
ENSG00000100104.8	SRRD	-0.062086	0.795606	0.999924	4.33204
ENSG00000100105.13	PATZ1	0.36491	0.207288	0.999924	5.98835
ENSG00000100106.15	TRIOBP	0.0473555	0.875205	0.999924	4.03059
ENSG00000100109.12	TFIP11	-0.211217	0.363656	0.999924	4.73788
ENSG00000100116.12	GCAT	-0.159705	0.653781	0.999924	5.10796
ENSG00000100124.8	ANKRD54	-0.185882	0.448006	0.999924	5.14923
ENSG00000100129.13	EIF3L	0.312756	0.353152	0.999924	8.4777
ENSG00000100138.9	NHP2L1	-0.0139559	0.950416	0.999924	6.92107
ENSG00000100139.9	MICALL1	0.118044	0.727621	0.999924	5.68941
ENSG00000100142.10	POLR2F	0.377151	0.111278	0.953514	5.15635
ENSG00000100147.9	CCDC134	0.152935	0.706967	0.999924	2.42475
ENSG00000100150.12	DEPDC5	-0.221616	0.468107	0.999924	4.18786
ENSG00000100151.11	PICK1	-0.149521	0.568415	0.999924	6.05028
ENSG00000100154.10	TTC28	0.359941	0.50266	0.999924	3.95566
ENSG00000100156.6	SLC16A8	0.258386	0.594863	0.999924	4.37485
ENSG00000100162.10	CENPM	-0.338298	0.556991	0.999924	4.63072
ENSG00000100167.15	SEPT3	0.524619	0.215522	0.999924	5.37348
ENSG00000100170.5	SLC5A1	0.183655	0.824053	0.999924	-0.32003
ENSG00000100181.17	TPTEP1	-0.00882332	0.969593	0.999924	5.61687
ENSG00000100191.4	SLC5A4	0.546707	0.27263	0.999924	1.02274
ENSG00000100196.6	KDELR3	0.0410421	0.916769	0.999924	2.80713
ENSG00000100197.16	CYP2D6	0.294729	0.522523	0.999924	2.0212
ENSG00000100201.14	DDX17	0.412938	0.201621	0.999924	9.54128
ENSG00000100206.5	DMC1	-1.12759	0.0663798	0.873827	2.04076
ENSG00000100207.14	TCF20	0.0337114	0.886494	0.999924	6.7399
ENSG00000100209.5	HSCB	0.222315	0.434947	0.999924	3.10249
ENSG00000100211.6	CBY1	0.441373	0.0524759	0.840029	4.55471
ENSG00000100216.4	TOMM22	0.214205	0.420815	0.999924	6.67819
ENSG00000100218.7	RTDR1	-0.5106	0.415936	0.999924	-0.21929
ENSG00000100219.12	XBP1	-0.280831	0.278918	0.999924	7.62132
ENSG00000100220.7	RTCB	0.106254	0.664103	0.999924	6.37984
ENSG00000100221.6	JOSD1	-0.467099	0.105097	0.946304	6.16041
ENSG00000100225.13	FBXO7	-0.000602842	0.997646	0.999924	6.68026
ENSG00000100226.11	GTPBP1	-0.0548064	0.845601	0.999924	6.20239
ENSG00000100227.13	POLDIP3	-0.0499197	0.827514	0.999924	6.67478
ENSG00000100228.8	RAB36	-0.397967	0.404907	0.999924	4.55356
ENSG00000100234.11	TIMP3	1.82145	0.0329683	0.719756	-0.503646
ENSG00000100239.11	PPP6R2	0.357692	0.192455	0.999924	6.71185
ENSG00000100241.16	SBF1	-0.0313883	0.903827	0.999924	7.64076
ENSG00000100242.11	SUN2	0.013345	0.956937	0.999924	6.3628
ENSG00000100243.16	CYB5R3	0.117154	0.696803	0.999924	6.9837
ENSG00000100246.8	DNAL4	0.215932	0.456042	0.999924	4.77894
ENSG00000100253.8	MIOX	0.452513	0.46633	0.999924	-0.347361
ENSG00000100258.13	LMF2	-0.319542	0.235709	0.999924	6.7218
ENSG00000100263.9	RHBDD3	-0.0304059	0.910586	0.999924	4.95021
ENSG00000100266.13	PACSIN2	-0.0615967	0.821755	0.999924	7.04815
ENSG00000100271.12	TTLL1	0.451568	0.291617	0.999924	2.95354
ENSG00000100276.9	RASL10A	-0.796704	0.195992	0.999924	-0.0116227
ENSG00000100280.12	AP1B1	-0.107693	0.708356	0.999924	7.52922
ENSG00000100281.9	HMGXB4	0.00228838	0.992084	0.999924	6.32689
ENSG00000100284.16	TOM1	0.0441216	0.892502	0.999924	4.83095
ENSG00000100285.9	NEFH	-0.863748	0.354714	0.999924	6.49246
ENSG00000100288.15	CHKB	0.389903	0.357028	0.999924	1.82517
ENSG00000100290.2	BIK	0.696795	0.0181025	0.617713	2.90248
ENSG00000100292.12	HMOX1	-0.153086	0.891601	0.999924	4.74514
ENSG00000100294.8	MCAT	0.000937627	0.996936	0.999924	4.66579
ENSG00000100296.9	THOC5	0.118939	0.583887	0.999924	5.59399
ENSG00000100297.11	MCM5	-0.559668	0.25462	0.999924	7.14502
ENSG00000100298.11	APOBEC3H	0.816816	0.364423	0.999924	-0.988835
ENSG00000100299.13	ARSA	-0.0754132	0.806895	0.999924	5.70772
ENSG00000100300.13	TSPO	0.181353	0.545085	0.999924	6.20834
ENSG00000100302.6	RASD2	0.0216819	0.969297	0.999924	0.0132798
ENSG00000100304.12	TTLL12	0.137602	0.628957	0.999924	6.72469
ENSG00000100307.8	CBX7	-0.163698	0.575388	0.999924	5.67256
ENSG00000100311.12	PDGFB	0.19814	0.531443	0.999924	4.17422
[truncated: 17,963 more rows]

## Sheet: del Site4 DEG
ensembl	symbol	logFC	PValue	FDR	logCPM
ENSG00000000003.10	TSPAN6	0.282723	0.419792	0.795131	2.76902
ENSG00000000419.8	DPM1	-0.193749	0.326416	0.727274	5.61459
ENSG00000000457.9	SCYL3	-0.00644354	0.978426	0.995786	4.60292
ENSG00000000460.12	C1orf112	-0.480988	0.255913	0.672786	4.3513
ENSG00000000971.11	CFH	0.263179	0.678631	0.909549	-0.507007
ENSG00000001036.9	FUCA2	0.0936977	0.73537	0.928159	6.0263
ENSG00000001084.6	GCLC	-0.623373	0.122379	0.502324	7.25358
ENSG00000001167.10	NFYA	-0.205384	0.391262	0.776765	6.48111
ENSG00000001460.13	STPG1	0.302564	0.211646	0.629865	3.82003
ENSG00000001461.12	NIPAL3	0.0140627	0.938693	0.984869	6.97476
ENSG00000001497.12	LAS1L	-0.0983624	0.638897	0.894806	5.94023
ENSG00000001561.6	ENPP4	0.110646	0.680036	0.910134	5.41383
ENSG00000001617.7	SEMA3F	1.996	0.0011668	0.0433301	3.6283
ENSG00000001626.10	CFTR	3.79918	4.39456e-07	0.00023086	-0.291753
ENSG00000001629.5	ANKIB1	0.169153	0.46043	0.816188	7.34702
ENSG00000001630.11	CYP51A1	0.48483	0.22095	0.638502	3.71094
ENSG00000001631.10	KRIT1	0.513405	0.0496536	0.340924	5.62172
ENSG00000002016.12	RAD52	0.451935	0.0575541	0.365774	4.49163
ENSG00000002079.8	MYH16	0.79553	0.113283	0.486943	1.07261
ENSG00000002330.9	BAD	-0.22389	0.380713	0.769599	5.21302
ENSG00000002549.8	LAP3	-0.0273613	0.887443	0.972405	5.59953
ENSG00000002586.13	CD99	-0.644455	0.0740064	0.409164	4.99006
ENSG00000002587.5	HS3ST1	-0.117241	0.819208	0.953056	-0.128719
ENSG00000002726.15	AOC1	-0.843169	0.207678	0.624639	0.110548
ENSG00000002745.8	WNT16	-0.121292	0.8576	0.962255	0.200919
ENSG00000002746.10	HECW1	-1.86513	0.00843177	0.142519	-0.758648
ENSG00000002822.11	MAD1L1	0.0915887	0.679318	0.909892	5.3305
ENSG00000002834.13	LASP1	-0.307557	0.198427	0.615063	8.00236
ENSG00000002919.10	SNX11	-0.223878	0.375928	0.765689	4.02594
ENSG00000003056.3	M6PR	0.210082	0.413302	0.791719	6.33531
ENSG00000003096.9	KLHL13	0.177058	0.679844	0.910015	2.84848
ENSG00000003137.4	CYP26B1	0.573077	0.40279	0.784515	-0.495323
ENSG00000003147.13	ICA1	0.399198	0.205795	0.622908	5.90339
ENSG00000003249.9	DBNDD1	0.394041	0.0967804	0.456336	5.22482
ENSG00000003393.10	ALS2	-0.0570133	0.781923	0.942216	4.9771
ENSG00000003400.10	CASP10	0.746968	0.103155	0.46874	0.245331
ENSG00000003402.15	CFLAR	-0.0200058	0.933323	0.984187	6.14369
ENSG00000003436.10	TFPI	2.36163	0.000895558	0.0382378	5.38203
ENSG00000003509.11	NDUFAF7	0.107235	0.623717	0.888125	3.7931
ENSG00000003756.12	RBM5	0.540665	0.062917	0.381277	6.60547
ENSG00000003987.9	MTMR7	-0.305179	0.315386	0.71854	2.36539
ENSG00000003989.12	SLC7A2	1.28908	0.00903851	0.146213	5.78596
ENSG00000004059.6	ARF5	0.417515	0.0988854	0.460665	7.21349
ENSG00000004139.9	SARM1	-0.240427	0.251781	0.667608	5.37391
ENSG00000004142.7	POLDIP2	-0.00229092	0.990893	0.997746	7.18052
ENSG00000004399.8	PLXND1	0.00445217	0.993013	0.997746	4.70857
ENSG00000004455.12	AK2	0.0763265	0.675756	0.907952	7.02906
ENSG00000004468.8	CD38	0.494575	0.426256	0.799356	-0.310384
ENSG00000004478.5	FKBP4	0.240207	0.360093	0.754451	8.56925
ENSG00000004487.11	KDM1A	0.0504249	0.817594	0.952432	6.64421
ENSG00000004534.10	RBM6	0.207437	0.220511	0.638502	6.5485
ENSG00000004660.10	CAMKK1	0.318339	0.425717	0.799259	2.96637
ENSG00000004700.11	RECQL	-0.600744	0.0620625	0.379421	5.59591
ENSG00000004766.11	CCDC132	0.373273	0.143367	0.540764	5.32923
ENSG00000004776.7	HSPB6	-0.193618	0.804796	0.94888	5.93755
ENSG00000004777.14	ARHGAP33	-0.664255	0.12173	0.501261	5.32813
ENSG00000004779.5	NDUFAB1	0.296604	0.313717	0.717666	5.96655
ENSG00000004799.7	PDK4	2.45098	0.020237	0.217891	5.47097
ENSG00000004809.9	SLC22A16	2.52407	0.000296929	0.0186885	0.612664
ENSG00000004838.9	ZMYND10	-1.00665	0.04875	0.337664	1.50354
ENSG00000004848.6	ARX	-0.00298865	0.994305	0.998219	1.09699
ENSG00000004864.9	SLC25A13	0.410633	0.111285	0.483781	6.34597
ENSG00000004866.14	ST7	2.13857	0.000346315	0.0206362	5.77389
ENSG00000004897.7	CDC27	-0.198488	0.413887	0.79213	6.37748
ENSG00000004961.10	HCCS	0.269467	0.286521	0.697386	4.91242
ENSG00000004975.7	DVL2	-0.295136	0.208355	0.625911	6.35064
ENSG00000005001.5	PRSS22	-0.59387	0.134596	0.524297	1.96868
ENSG00000005007.8	UPF1	0.331355	0.12947	0.51452	6.6679
ENSG00000005020.8	SKAP2	0.0980496	0.636437	0.893743	5.97951
ENSG00000005022.5	SLC25A5	-0.0909852	0.727702	0.926198	8.35591
ENSG00000005059.11	CCDC109B	-0.576754	0.090755	0.445233	4.6772
ENSG00000005073.5	HOXA11	1.79621	0.00877359	0.144623	0.161608
ENSG00000005075.11	POLR2J	0.299915	0.249928	0.666284	5.06048
ENSG00000005100.8	DHX33	0.103765	0.610947	0.883342	6.36677
ENSG00000005108.11	THSD7A	0.793397	0.275403	0.689007	-0.058141
ENSG00000005156.7	LIG3	-0.0111151	0.949363	0.987289	6.36061
ENSG00000005175.5	RPAP3	0.147968	0.447895	0.811161	6.26016
ENSG00000005187.7	ACSM3	0.91739	0.0218599	0.227511	4.70987
ENSG00000005189.15	AC004381.6	-0.159957	0.717338	0.923444	5.56809
ENSG00000005194.10	CIAPIN1	0.0433769	0.840578	0.957904	5.72184
ENSG00000005206.12	SPPL2B	0.325677	0.24167	0.659233	6.01419
ENSG00000005238.15	FAM214B	-0.66901	0.0279003	0.256348	5.20746
ENSG00000005243.5	COPZ2	-1.61747	2.40877e-05	0.00354475	1.58931
ENSG00000005249.8	PRKAR2B	-0.216685	0.44916	0.811342	5.58518
ENSG00000005302.13	MSL3	-0.0147028	0.950978	0.987289	5.92772
ENSG00000005339.8	CREBBP	0.0351478	0.898703	0.975941	7.12468
ENSG00000005379.11	BZRAP1	-0.24858	0.445485	0.810498	6.20896
ENSG00000005421.4	PON1	-0.765774	0.00446286	0.0996505	5.05195
ENSG00000005436.9	GCFC2	-0.222623	0.365827	0.757886	5.79074
ENSG00000005448.12	WDR54	-0.411356	0.0995696	0.462479	4.36147
ENSG00000005469.7	CROT	0.698288	0.181698	0.592245	6.67537
ENSG00000005471.11	ABCB4	-0.0164684	0.964303	0.992494	0.834228
ENSG00000005483.15	KMT2E	0.439518	0.0673067	0.3929	7.51251
ENSG00000005486.12	RHBDD2	0.551536	0.0424661	0.316099	6.63545
ENSG00000005513.9	SOX8	0.490359	0.519205	0.845105	-0.864914
ENSG00000005700.10	IBTK	-0.352508	0.112728	0.485636	6.9485
ENSG00000005801.12	ZNF195	0.177578	0.429589	0.80107	5.6478
ENSG00000005810.13	MYCBP2	-0.358472	0.106795	0.476281	6.98562
ENSG00000005812.6	FBXL3	-0.289814	0.181164	0.591474	5.36341
ENSG00000005844.13	ITGAL	-0.247683	0.542738	0.856262	1.66872
ENSG00000005882.7	PDK2	-0.325011	0.20014	0.616589	4.16123
ENSG00000005884.13	ITGA3	0.262732	0.296601	0.705102	4.99163
ENSG00000005889.11	ZFX	-0.234242	0.279186	0.692918	5.79529
ENSG00000005893.11	LAMP2	-0.113815	0.607923	0.882229	6.55297
ENSG00000005955.8	GGNBP2	-0.148778	0.403307	0.784747	6.65147
ENSG00000005961.13	ITGA2B	-1.26902	0.0147874	0.188032	1.45121
ENSG00000006007.7	GDE1	0.231594	0.261083	0.675378	6.36227
ENSG00000006015.13	C19orf60	-0.263742	0.164896	0.573265	5.37722
ENSG00000006016.6	CRLF1	-0.477551	0.429306	0.800933	2.04317
ENSG00000006042.7	TMEM98	0.395275	0.199107	0.616212	4.4842
ENSG00000006047.8	YBX2	-0.185584	0.809708	0.949949	5.00779
ENSG00000006062.9	MAP3K14	0.0724158	0.788892	0.945023	4.05639
ENSG00000006071.7	ABCC8	-0.0468902	0.947626	0.986525	0.483316
ENSG00000006114.11	SYNRG	0.199009	0.31332	0.717665	6.42788
ENSG00000006118.10	TMEM132A	-0.23337	0.391026	0.776739	6.30108
ENSG00000006125.12	AP2B1	0.0306701	0.887269	0.972405	8.45208
ENSG00000006194.6	ZNF263	-0.239667	0.341108	0.739247	5.6618
ENSG00000006210.6	CX3CL1	2.32201	1.19251e-05	0.0023338	4.72811
ENSG00000006282.15	SPATA20	0.255174	0.39205	0.777324	7.78572
ENSG00000006283.13	CACNA1G	1.12829	0.115746	0.490142	1.52136
ENSG00000006327.9	TNFRSF12A	0.628039	0.182339	0.592688	3.4371
ENSG00000006432.11	MAP3K9	0.0479132	0.816333	0.952362	5.59656
ENSG00000006451.3	RALA	0.410926	0.11007	0.482726	6.2409
ENSG00000006453.9	BAIAP2L1	0.168088	0.451991	0.812633	5.84187
ENSG00000006459.6	JHDM1D	0.668214	0.0761566	0.41446	5.85232
ENSG00000006468.9	ETV1	2.1703	0.00183094	0.0580379	4.17856
ENSG00000006530.11	AGK	0.605696	0.00853025	0.143158	6.04343
ENSG00000006534.11	ALDH3B1	-0.325852	0.289331	0.699653	2.60926
ENSG00000006576.12	PHTF2	0.0931865	0.791601	0.945425	7.00153
ENSG00000006607.9	FARP2	0.132653	0.510809	0.840416	5.57728
ENSG00000006611.11	USH1C	2.95981	1.01785e-05	0.00223069	1.82463
ENSG00000006625.13	GGCT	0.161638	0.570942	0.869014	6.72502
ENSG00000006634.3	DBF4	-0.106548	0.772829	0.93907	5.41239
ENSG00000006638.7	TBXA2R	-0.484286	0.350952	0.747289	1.71592
ENSG00000006652.9	IFRD1	0.708939	0.053572	0.352939	6.54952
ENSG00000006695.6	COX10	-0.0809969	0.728957	0.926313	4.22043
ENSG00000006704.6	GTF2IRD1	0.270559	0.419019	0.794677	5.10248
ENSG00000006712.10	PAF1	-0.188498	0.399441	0.782481	6.6264
ENSG00000006715.11	VPS41	0.28753	0.268214	0.682244	6.82881
ENSG00000006740.12	ARHGAP44	-1.10522	0.0622239	0.37978	2.84764
ENSG00000006744.14	ELAC2	0.0897449	0.711981	0.921766	6.66936
ENSG00000006747.10	SCIN	-1.71793	0.020078	0.217087	6.41116
ENSG00000006756.11	ARSD	0.45567	0.0276951	0.256069	5.39202
ENSG00000006757.7	PNPLA4	-0.100814	0.628429	0.889726	4.37653
ENSG00000006831.9	ADIPOR2	0.0664034	0.758765	0.93416	6.80617
ENSG00000006837.7	CDKL3	0.569891	0.232619	0.650629	0.826225
ENSG00000007038.6	PRSS21	2.17297	0.000324692	0.0197607	4.16217
ENSG00000007047.10	MARK4	0.334033	0.208132	0.625525	5.20976
ENSG00000007080.6	CCDC124	0.149187	0.507608	0.839641	6.60888
ENSG00000007168.8	PAFAH1B1	0.0200457	0.925444	0.982109	7.30922
ENSG00000007202.10	KIAA0100	0.0794373	0.667571	0.904756	8.12812
ENSG00000007255.6	TRAPPC6A	-0.121388	0.583576	0.874181	4.89518
ENSG00000007264.9	MATK	0.17741	0.392575	0.777827	5.85612
ENSG00000007341.14	ST7L	-0.0684504	0.758141	0.933968	3.95754
ENSG00000007350.12	TKTL1	0.800896	0.153018	0.556092	-0.284941
ENSG00000007372.16	PAX6	-1.08238	0.0171685	0.200537	3.50478
ENSG00000007376.3	RPUSD1	0.109962	0.632208	0.890513	5.33873
ENSG00000007384.11	RHBDF1	0.42676	0.0931745	0.449155	5.56978
ENSG00000007392.12	LUC7L	0.299562	0.24921	0.665495	6.21321
ENSG00000007402.7	CACNA2D2	0.0730351	0.751211	0.932219	4.54547
ENSG00000007516.9	BAIAP3	0.487773	0.229876	0.647403	3.86343
ENSG00000007520.3	TSR3	0.079011	0.736593	0.92842	5.34616
ENSG00000007541.10	PIGQ	-0.0221291	0.927237	0.982495	6.00077
ENSG00000007545.11	CRAMP1L	0.11128	0.630323	0.889907	4.95085
ENSG00000007866.14	TEAD3	0.519526	0.127707	0.511947	3.95101
ENSG00000007923.11	DNAJC11	0.0897764	0.625747	0.888992	5.94772
ENSG00000007944.10	MYLIP	-1.0177	0.00548572	0.114188	4.2286
ENSG00000007952.13	NOX1	-0.00726436	0.987778	0.997512	0.0143754
ENSG00000007968.6	E2F2	-0.581985	0.347148	0.744976	6.20936
ENSG00000008018.8	PSMB1	-0.0987332	0.656678	0.899513	6.75585
ENSG00000008056.8	SYN1	0.978808	0.0128068	0.174148	3.88003
ENSG00000008083.9	JARID2	0.729283	0.010664	0.158506	4.92319
ENSG00000008086.6	CDKL5	-0.901921	0.0166892	0.198094	1.47254
ENSG00000008128.18	CDK11A	0.29333	0.505468	0.837982	0.757879
ENSG00000008130.11	NADK	0.196512	0.367928	0.758856	6.33337
ENSG00000008196.8	TFAP2B	1.7964	0.00706758	0.129172	-0.783403
ENSG00000008197.4	TFAP2D	-0.757143	0.11898	0.49605	-0.202168
ENSG00000008226.15	DLEC1	0.0564185	0.91052	0.977483	-0.199103
ENSG00000008256.11	CYTH3	-1.06391	0.000146046	0.012106	6.30917
ENSG00000008277.10	ADAM22	-0.144818	0.606651	0.881283	5.6859
ENSG00000008282.3	SYPL1	0.206257	0.425606	0.799167	5.74852
ENSG00000008283.11	CYB561	-0.00404244	0.983938	0.99682	7.32279
ENSG00000008294.16	SPAG9	-0.0820204	0.663219	0.902852	7.22183
ENSG00000008300.10	CELSR3	0.103607	0.67299	0.906066	7.79218
ENSG00000008311.10	AASS	0.688755	0.0287259	0.259822	4.32226
ENSG00000008323.11	PLEKHG6	-0.918015	0.00299685	0.0782003	3.94576
ENSG00000008324.6	SS18L2	-0.0815539	0.770709	0.938161	4.19501
ENSG00000008382.11	MPND	-0.0478929	0.867971	0.96543	3.67394
ENSG00000008394.8	MGST1	0.353829	0.327693	0.728281	6.88901
ENSG00000008405.7	CRY1	-0.269983	0.323778	0.725308	5.06588
ENSG00000008441.12	NFIX	0.324086	0.18347	0.593342	9.89642
ENSG00000008513.10	ST3GAL1	1.62341	0.000430886	0.0241285	7.48998
ENSG00000008516.12	MMP25	0.859706	0.0655306	0.389092	1.43999
ENSG00000008710.13	PKD1	-0.0546608	0.866007	0.964956	6.65813
ENSG00000008735.10	MAPK8IP2	-0.0122162	0.953544	0.98835	7.93982
ENSG00000008838.13	MED24	0.0834618	0.673932	0.906889	6.50564
ENSG00000008853.12	RHOBTB2	0.730664	0.000787219	0.0350969	4.85742
ENSG00000008869.7	HEATR5B	-0.105122	0.59073	0.875406	6.09152
ENSG00000008952.12	SEC62	0.127903	0.468603	0.821093	7.19884
ENSG00000008988.5	RPS20	0.385968	0.0673138	0.3929	8.05673
ENSG00000009307.11	CSDE1	0.0243777	0.892527	0.974119	9.37529
ENSG00000009335.13	UBE3C	0.286578	0.132528	0.520874	7.61117
ENSG00000009413.11	REV3L	0.0690083	0.800528	0.948038	6.20495
ENSG00000009694.9	TENM1	1.36268	0.00468785	0.103326	5.5906
ENSG00000009724.12	MASP2	-0.0153181	0.968054	0.993595	2.0872
ENSG00000009780.11	FAM76A	0.00449636	0.985022	0.996848	4.06695
ENSG00000009790.10	TRAF3IP3	-0.019419	0.950229	0.987289	1.84347
ENSG00000009830.7	POMT2	-0.0515191	0.79043	0.945425	5.28154
ENSG00000009844.11	VTA1	0.326087	0.162902	0.571077	6.33747
ENSG00000009950.11	MLXIPL	1.06105	0.129514	0.51452	3.53452
ENSG00000009954.6	BAZ1B	0.177473	0.40211	0.784153	8.25295
ENSG00000010017.9	RANBP9	-0.491268	0.0153698	0.191399	6.22227
ENSG00000010030.9	ETV7	0.022911	0.966249	0.993305	1.23765
ENSG00000010072.11	SPRTN	-0.394622	0.0660077	0.390298	5.20958
ENSG00000010165.15	METTL13	0.0758746	0.746124	0.930537	6.11714
ENSG00000010219.9	DYRK4	-0.10968	0.648765	0.897124	3.93736
ENSG00000010244.12	ZNF207	0.0298427	0.867272	0.965182	7.60991
ENSG00000010256.6	UQCRC1	-0.0497956	0.813158	0.951083	7.87523
ENSG00000010270.9	STARD3NL	-0.25967	0.323008	0.724976	6.96285
ENSG00000010278.7	CD9	0.895968	0.0181686	0.207731	7.10941
ENSG00000010292.8	NCAPD2	-0.341757	0.430987	0.80131	7.99748
ENSG00000010295.15	IFFO1	-0.960324	0.0326743	0.277669	3.54719
ENSG00000010310.4	GIPR	1.13771	0.0177907	0.20574	1.078
ENSG00000010318.15	PHF7	-0.633272	0.0227245	0.232509	2.96929
ENSG00000010319.2	SEMA3G	0.754359	0.113106	0.486496	1.98655
ENSG00000010322.11	NISCH	0.30219	0.144906	0.54403	6.75855
ENSG00000010327.6	STAB1	-0.780968	0.114011	0.487782	-0.279528
ENSG00000010361.9	FUZ	0.329685	0.26497	0.679253	3.20877
ENSG00000010379.11	SLC6A13	0.429162	0.558998	0.863034	-1.08238
ENSG00000010404.13	IDS	-0.42959	0.19996	0.616589	5.6541
ENSG00000010438.12	PRSS3	3.52554	0.00016879	0.013248	0.485121
ENSG00000010539.7	ZNF200	0.0884538	0.730292	0.926795	4.13141
ENSG00000010610.5	CD4	0.456286	0.314748	0.71854	1.45269
ENSG00000010626.10	LRRC23	0.362562	0.266373	0.680072	3.37714
ENSG00000010704.14	HFE	1.91807	0.00614601	0.120432	-0.432614
ENSG00000010803.12	SCMH1	-0.0686837	0.70902	0.921495	6.0938
ENSG00000010810.13	FYN	0.0647429	0.909767	0.977309	3.15029
ENSG00000010818.4	HIVEP2	-1.37296	0.00251933	0.0694624	6.2933
ENSG00000010932.11	FMO1	0.264399	0.653984	0.898475	1.0448
ENSG00000011007.8	TCEB3	-0.241079	0.240908	0.659091	6.96866
ENSG00000011009.6	LYPLA2	0.600957	0.016302	0.196542	5.31175
ENSG00000011021.17	CLCN6	-0.168419	0.581473	0.873326	4.65296
ENSG00000011028.9	MRC2	1.46475	0.0172635	0.201411	2.30722
ENSG00000011105.7	TSPAN9	2.11452	5.45901e-06	0.0013794	1.22489
ENSG00000011114.10	BTBD7	-0.0757437	0.676102	0.908172	6.07455
ENSG00000011132.7	APBA3	0.210509	0.386022	0.773149	4.13024
ENSG00000011143.12	MKS1	0.0494304	0.824268	0.954743	4.3102
ENSG00000011198.3	ABHD5	-0.413016	0.197273	0.613772	4.51936
ENSG00000011201.6	KAL1	0.712096	0.046296	0.32994	3.61551
ENSG00000011243.13	AKAP8L	0.315483	0.182364	0.592688	6.11967
ENSG00000011258.11	MBTD1	0.21748	0.350115	0.747166	5.54146
ENSG00000011260.9	UTP18	-0.131909	0.568209	0.867887	5.51527
ENSG00000011275.14	RNF216	0.538838	0.0449374	0.324389	6.1115
ENSG00000011295.11	TTC19	-0.0392902	0.823438	0.954279	6.60257
ENSG00000011304.12	PTBP1	-0.131192	0.541514	0.855382	8.74534
ENSG00000011332.15	DPF1	1.03593	0.0842419	0.43329	1.35604
ENSG00000011347.5	SYT7	0.269519	0.339525	0.737914	6.78358
ENSG00000011376.5	LARS2	-0.0393159	0.844153	0.95897	6.07109
ENSG00000011405.9	PIK3C2A	-0.00476865	0.98475	0.996848	6.97034
ENSG00000011422.7	PLAUR	-0.736126	0.108377	0.479687	2.48317
ENSG00000011426.6	ANLN	-0.175245	0.776529	0.940485	7.40757
ENSG00000011451.13	WIZ	0.215467	0.23472	0.652393	6.70436
ENSG00000011454.12	RABGAP1	0.197819	0.328516	0.729053	6.2808
ENSG00000011465.12	DCN	1.2338	0.0984208	0.459251	1.39719
ENSG00000011478.7	QPCTL	0.20019	0.503761	0.837288	3.77812
ENSG00000011485.10	PPP5C	0.0179587	0.920234	0.98045	6.5254
ENSG00000011523.9	CEP68	0.0769459	0.759905	0.934641	4.56474
ENSG00000011566.10	MAP4K3	0.0100193	0.953326	0.988276	5.65668
ENSG00000011590.9	ZBTB32	-0.133706	0.766353	0.936915	1.07555
ENSG00000011638.6	TMEM159	0.546068	0.0397995	0.307341	3.04108
ENSG00000011677.8	GABRA3	0.220412	0.495921	0.832795	3.18873
ENSG00000012048.15	BRCA1	-0.561264	0.230191	0.64781	6.86347
ENSG00000012061.11	ERCC1	0.0814672	0.746143	0.930537	4.98669
ENSG00000012171.13	SEMA3B	-0.406865	0.272704	0.687391	4.74748
ENSG00000012174.7	MBTPS2	-0.110272	0.615439	0.884372	5.72658
ENSG00000012211.8	PRICKLE3	-0.283181	0.236472	0.654758	4.40026
ENSG00000012232.4	EXTL3	-0.104631	0.593522	0.876571	6.48267
ENSG00000012504.9	NR1H4	-0.391357	0.423858	0.79874	1.98133
ENSG00000012660.9	ELOVL5	-0.101814	0.710234	0.921495	7.81608
ENSG00000012817.11	KDM5D	-0.287719	0.208296	0.625828	6.20683
ENSG00000012822.11	CALCOCO1	-0.142667	0.739761	0.928691	6.08464
ENSG00000012963.9	UBR7	-0.368334	0.146416	0.547249	6.35511
ENSG00000012983.7	MAP4K5	-0.123984	0.560685	0.864277	6.20961
ENSG00000013016.10	EHD3	0.128792	0.784708	0.943618	1.64705
ENSG00000013275.3	PSMC4	-0.144072	0.614516	0.883852	6.68561
ENSG00000013288.4	MAN2B2	-0.369395	0.0852853	0.435333	5.90327
ENSG00000013293.5	SLC7A14	1.53149	0.0101744	0.154803	-0.281616
ENSG00000013297.6	CLDN11	2.34507	8.02148e-05	0.00804647	5.17685
ENSG00000013306.11	SLC25A39	0.0146694	0.947001	0.986332	8.26666
ENSG00000013364.14	MVP	-0.0225616	0.925499	0.982109	7.23931
ENSG00000013374.11	NUB1	0.12772	0.531676	0.849681	6.36964
ENSG00000013375.11	PGM3	-1.00257	3.95261e-06	0.00117119	6.21064
ENSG00000013392.6	RWDD2A	-1.00536	0.00152158	0.0517491	4.72672
ENSG00000013441.11	CLK1	-0.796981	0.0378306	0.30003	6.50162
ENSG00000013503.5	POLR3B	0.128017	0.547545	0.857338	5.5857
ENSG00000013523.5	ANGEL1	-0.174957	0.568355	0.867887	4.79897
ENSG00000013561.13	RNF14	-0.170223	0.45302	0.812983	6.2632
ENSG00000013563.9	DNASE1L1	0.032659	0.888321	0.972719	4.21799
ENSG00000013573.12	DDX11	-0.370021	0.27882	0.692374	5.74173
ENSG00000013583.4	HEBP1	-0.710824	0.0224285	0.23102	4.83028
ENSG00000013588.5	GPRC5A	3.69709	3.94011e-06	0.00117119	2.97221
ENSG00000013619.9	MAMLD1	-0.568605	0.178935	0.589525	2.56884
ENSG00000013725.10	CD6	-0.608883	0.210362	0.628441	1.37424
ENSG00000013810.14	TACC3	-0.509606	0.33225	0.732461	7.04933
ENSG00000014123.9	UFL1	-0.445393	0.0334586	0.279925	5.74472
ENSG00000014138.4	POLA2	-0.498313	0.167349	0.576167	5.88693
ENSG00000014164.6	ZC3H3	-0.0412078	0.831445	0.955875	5.10995
ENSG00000014216.11	CAPN1	-0.222918	0.336161	0.735553	7.06298
ENSG00000014257.11	ACPP	0.726571	0.163409	0.571708	3.74841
ENSG00000014641.13	MDH1	-0.0710499	0.752051	0.93246	7.3531
ENSG00000014824.9	SLC30A9	-0.186915	0.267785	0.681683	7.47728
ENSG00000014914.15	MTMR11	0.477441	0.101963	0.46679	4.20635
ENSG00000014919.8	COX15	0.102715	0.572304	0.870333	6.62922
ENSG00000015133.14	CCDC88C	0.251824	0.309194	0.71441	4.64047
ENSG00000015153.10	YAF2	-0.308633	0.178383	0.589256	4.54026
ENSG00000015171.14	ZMYND11	-0.0924732	0.59625	0.877733	7.31276
ENSG00000015285.6	WAS	-0.230894	0.450507	0.812263	1.64036
ENSG00000015475.14	BID	1.16635	0.00101322	0.0406959	3.35262
ENSG00000015479.13	MATR3	0.0334779	0.843519	0.958794	8.66406
ENSG00000015520.10	NPC1L1	2.1518	0.0106943	0.158839	1.95197
ENSG00000015532.5	XYLT2	0.00173518	0.994321	0.998219	4.45911
ENSG00000015592.12	STMN4	-0.610117	0.480888	0.826544	2.75956
ENSG00000015676.13	NUDCD3	0.154795	0.4209	0.795851	7.12822
ENSG00000016082.10	ISL1	-1.47496	0.00275751	0.0739858	1.4866
ENSG00000016391.6	CHDH	-0.144862	0.564278	0.865938	5.77943
ENSG00000016402.8	IL20RA	0.967384	0.0880114	0.440681	-0.174637
ENSG00000016864.12	GLT8D1	-0.104884	0.626811	0.889404	5.73222
ENSG00000017260.15	ATP2C1	0.112383	0.648822	0.897124	7.32198
ENSG00000017373.11	SRCIN1	-0.0974596	0.750904	0.932067	5.2178
ENSG00000017427.11	IGF1	-0.524433	0.275194	0.688657	4.34761
ENSG00000017483.10	SLC38A5	0.512017	0.334496	0.733916	-0.160736
ENSG00000017621.11	MAGIX	-0.634194	0.206933	0.624015	0.972572
ENSG00000017797.7	RALBP1	-0.0794201	0.701058	0.918461	6.28932
ENSG00000018189.8	RUFY3	0.152291	0.471802	0.823195	5.1258
ENSG00000018236.10	CNTN1	-0.42466	0.537178	0.851585	3.24525
ENSG00000018280.12	SLC11A1	0.502352	0.244559	0.661303	1.41106
ENSG00000018408.10	WWTR1	-0.363239	0.32995	0.730275	3.41868
ENSG00000018510.8	AGPS	0.355668	0.163554	0.571708	5.04768
ENSG00000018610.9	CXorf56	-0.298043	0.168236	0.577529	4.46073
ENSG00000018699.7	TTC27	0.0241693	0.92394	0.981569	4.69168
ENSG00000018869.12	ZNF582	0.379331	0.228073	0.645486	2.95408
ENSG00000019102.7	VSIG2	-1.18941	0.0203743	0.218613	-0.217941
ENSG00000019144.12	PHLDB1	-0.101437	0.632065	0.890422	5.18681
ENSG00000019485.8	PRDM11	-0.18777	0.627869	0.88947	1.26234
ENSG00000019991.11	HGF	1.20784	0.141565	0.536125	6.82574
ENSG00000019995.6	ZRANB1	-0.306744	0.140192	0.533964	5.90876
ENSG00000020129.11	NCDN	0.138289	0.593791	0.87672	6.13894
ENSG00000020219.8	CCT8L1P	-0.581098	0.323112	0.72499	-0.670776
ENSG00000020256.15	ZFP64	0.0687386	0.764875	0.936312	4.96187
ENSG00000020426.6	MNAT1	-0.334279	0.104062	0.470185	4.54252
ENSG00000020577.9	SAMD4A	0.53145	0.0916613	0.446457	4.71483
ENSG00000020922.8	MRE11A	-0.189762	0.479294	0.826096	3.83959
ENSG00000021300.9	PLEKHB1	0.502227	0.246702	0.663552	4.31684
ENSG00000021355.8	SERPINB1	0.311864	0.211807	0.62991	6.07203
ENSG00000021488.8	SLC7A9	0.572103	0.267338	0.68121	-0.0355339
ENSG00000021574.7	SPAST	-0.2351	0.256588	0.672786	5.23522
ENSG00000021762.15	OSBPL5	0.0775365	0.794112	0.946181	5.47165
ENSG00000021776.6	AQR	0.0514637	0.780104	0.941597	6.292
ENSG00000021826.10	CPS1	-2.70592	0.000567645	0.0284033	3.51441
ENSG00000022277.8	RTFDC1	0.0148119	0.941901	0.985184	5.57656
ENSG00000022355.10	GABRA1	-1.3255	0.0245416	0.239794	5.13871
ENSG00000022567.5	SLC45A4	1.14967	6.95518e-05	0.00719375	3.79305
ENSG00000022840.11	RNF10	-0.0660724	0.733606	0.928159	7.74023
ENSG00000022976.11	ZNF839	0.101887	0.606148	0.881283	5.45459
ENSG00000023041.7	ZDHHC6	-0.10678	0.605611	0.881201	4.86796
ENSG00000023191.12	RNH1	-0.214596	0.317432	0.71974	6.7908
ENSG00000023228.9	NDUFS1	-0.171887	0.380492	0.769449	7.89667
ENSG00000023287.8	RB1CC1	-0.305038	0.189202	0.602658	6.55665
ENSG00000023318.7	ERP44	-0.336913	0.102494	0.467441	6.7477
ENSG00000023330.10	ALAS1	0.269914	0.345297	0.743002	6.09686
ENSG00000023445.9	BIRC3	0.943899	0.014026	0.183736	1.66164
ENSG00000023516.7	AKAP11	-0.162041	0.411086	0.789781	6.9464
ENSG00000023572.4	GLRX2	-0.225655	0.496381	0.832795	4.32033
ENSG00000023608.4	SNAPC1	-0.113184	0.65452	0.898616	3.41755
ENSG00000023697.8	DERA	-0.217633	0.576488	0.871355	4.93032
ENSG00000023734.6	STRAP	0.0671711	0.73333	0.928147	7.95396
ENSG00000023839.6	ABCC2	-1.44952	0.00890303	0.145265	4.63502
ENSG00000023892.9	DEF6	-0.168805	0.548679	0.857693	4.37593
ENSG00000023902.9	PLEKHO1	0.363042	0.356061	0.750828	4.03538
ENSG00000023909.5	GCLM	0.4484	0.304612	0.710857	5.32743
ENSG00000024048.6	UBR2	0.10853	0.535613	0.850386	6.56252
ENSG00000024422.7	EHD2	0.367062	0.310672	0.715712	1.27237
ENSG00000024526.12	DEPDC1	-0.588771	0.322236	0.724491	5.92028
ENSG00000024862.12	CCDC28A	-0.0670074	0.787806	0.944739	3.63331
ENSG00000025039.10	RRAGD	-0.79969	0.00504581	0.108511	6.39486
ENSG00000025156.8	HSF2	-0.147721	0.490761	0.83136	4.56464
ENSG00000025293.11	PHF20	-0.133194	0.433392	0.802689	6.40801
ENSG00000025423.7	HSD17B6	-0.645463	0.180671	0.591096	1.6691
ENSG00000025434.14	NR1H3	0.509946	0.157359	0.562838	3.34757
ENSG00000025708.8	TYMP	-0.429874	0.113359	0.486951	3.70254
ENSG00000025770.14	NCAPH2	-0.601171	0.0906467	0.445071	5.84425
ENSG00000025772.7	TOMM34	0.321342	0.176686	0.587736	5.87476
ENSG00000025796.9	SEC63	-0.168517	0.431943	0.801601	6.70427
ENSG00000025800.9	KPNA6	0.0690932	0.711469	0.921766	7.10753
ENSG00000026025.9	VIM	-0.881216	0.0683042	0.395838	3.53182
ENSG00000026036.16	RTEL1-TNFRSF6B	0.40957	0.341493	0.739678	3.04229
ENSG00000026103.15	FAS	0.531593	0.238819	0.657198	3.59265
ENSG00000026297.11	RNASET2	0.221749	0.496578	0.832795	3.36516
ENSG00000026508.12	CD44	0.135032	0.764181	0.936279	6.41518
ENSG00000026559.9	KCNG1	-6.0645	2.96541e-07	0.000174104	2.22181
ENSG00000026652.9	AGPAT4	0.0766976	0.882971	0.970587	1.40859
ENSG00000026950.12	BTN3A1	-1.00607	0.0400661	0.308208	2.74995
ENSG00000027001.7	MIPEP	-0.0949521	0.764866	0.936312	4.93456
ENSG00000027075.9	PRKCH	-0.0634234	0.910089	0.977346	2.59439
ENSG00000027697.8	IFNGR1	0.330578	0.122852	0.502946	4.8749
ENSG00000027847.9	B4GALT7	-0.246124	0.290507	0.700653	4.06598
ENSG00000027869.7	SH2D2A	1.17956	0.0187407	0.210762	0.492412
ENSG00000028116.12	VRK2	-0.0677671	0.742513	0.92932	4.96728
ENSG00000028203.13	VEZT	0.045319	0.8091	0.949874	7.16452
ENSG00000028277.16	POU2F2	1.11553	0.0397321	0.307241	0.308031
ENSG00000028310.13	BRD9	0.18837	0.293704	0.702405	5.55635
ENSG00000028528.10	SNX1	0.00551026	0.980551	0.996181	7.28502
ENSG00000028839.5	TBPL1	0.612098	0.0314135	0.271462	4.80222
ENSG00000029153.10	ARNTL2	-0.15237	0.766893	0.937135	4.17232
ENSG00000029363.11	BCLAF1	-0.145924	0.493482	0.83255	8.0695
ENSG00000029364.7	SLC39A9	-0.187045	0.277294	0.690725	6.841
ENSG00000029534.15	ANK1	0.0886682	0.848989	0.959535	4.29815
ENSG00000029639.6	TFB1M	-0.00311226	0.990963	0.997746	3.09443
ENSG00000029725.12	RABEP1	-0.275668	0.108636	0.479779	6.91726
ENSG00000029993.10	HMGB3	-0.310342	0.355091	0.75016	6.13217
ENSG00000030066.9	NUP160	-0.0192699	0.941242	0.985003	6.64304
ENSG00000030110.8	BAK1	0.307182	0.284154	0.696412	3.26069
ENSG00000030419.12	IKZF2	-0.231371	0.547386	0.857338	2.5972
ENSG00000030582.12	GRN	-0.479491	0.0635405	0.382882	6.67304
ENSG00000031003.6	FAM13B	0.104012	0.643227	0.895809	5.73636
ENSG00000031081.6	ARHGAP31	0.996272	0.00203741	0.0611354	3.52131
ENSG00000031544.10	NR2E3	0.277913	0.580818	0.873129	0.153322
ENSG00000031691.6	CENPQ	-0.603702	0.116522	0.492071	4.07209
ENSG00000031698.8	SARS	-0.441525	0.104097	0.470238	7.83842
ENSG00000031823.10	RANBP3	-0.11834	0.491517	0.83192	6.21191
ENSG00000032219.14	ARID4A	0.130186	0.555614	0.860982	5.65527
ENSG00000032389.8	TSSC1	-0.0854087	0.68801	0.913169	4.96319
ENSG00000032444.11	PNPLA6	0.187536	0.430321	0.80131	6.45658
ENSG00000032742.13	IFT88	0.450312	0.147421	0.548325	4.76413
ENSG00000033011.7	ALG1	0.25907	0.233462	0.651254	4.02334
ENSG00000033030.9	ZCCHC8	-0.234068	0.322546	0.724799	5.98801
ENSG00000033050.3	ABCF2	0.599022	0.0213102	0.223916	6.81856
ENSG00000033100.10	CHPF2	0.410095	0.156079	0.560126	5.61275
ENSG00000033122.14	LRRC7	-0.14871	0.716783	0.923379	1.89757
ENSG00000033170.12	FUT8	-0.710227	0.00663906	0.125383	4.08119
ENSG00000033178.8	UBA6	0.405327	0.0829998	0.429839	6.8169
ENSG00000033327.8	GAB2	-0.82382	0.0346066	0.285108	4.61606
ENSG00000033627.10	ATP6V0A1	-0.115411	0.620887	0.886753	6.86471
ENSG00000033800.9	PIAS1	0.0528457	0.791393	0.945425	5.02953
ENSG00000033867.12	SLC4A7	-0.00573837	0.984012	0.99682	4.43595
ENSG00000034053.10	APBA2	0.485172	0.0964562	0.455931	5.36319
ENSG00000034063.9	UHRF1	-0.309651	0.547951	0.857422	4.96698
ENSG00000034152.14	MAP2K3	0.479333	0.036574	0.293681	6.04007
ENSG00000034510.4	TMSB10	-0.354749	0.20462	0.621524	10.816
ENSG00000034533.7	ASTE1	-0.0418153	0.874284	0.968033	2.91202
ENSG00000034677.7	RNF19A	0.159305	0.796175	0.946751	5.79896
ENSG00000034693.10	PEX3	-0.0928892	0.691311	0.91463	4.69629
ENSG00000034713.3	GABARAPL2	-0.113046	0.574815	0.871106	6.18548
ENSG00000035115.17	SH3YL1	0.767926	0.0211702	0.223007	4.2578
ENSG00000035141.3	FAM136A	0.0833004	0.670135	0.905151	6.59707
ENSG00000035403.12	VCL	0.163911	0.432624	0.802067	7.3744
ENSG00000035499.8	DEPDC1B	-0.199225	0.752168	0.93246	4.57058
ENSG00000035664.7	DAPK2	0.185887	0.670043	0.905088	2.21593
ENSG00000035681.3	NSMAF	-0.112253	0.60642	0.881283	5.3368
ENSG00000035687.9	ADSS	-0.0548227	0.795109	0.946626	5.58183
ENSG00000035862.8	TIMP2	2.2499	0.000292698	0.0186078	1.03365
ENSG00000035928.10	RFC1	-0.161031	0.418957	0.794677	7.0878
ENSG00000036054.8	TBC1D23	-0.026932	0.908184	0.977079	4.14417
ENSG00000036257.8	CUL3	-0.0286331	0.873637	0.967753	7.13706
ENSG00000036448.5	MYOM2	1.44049	0.0432802	0.319097	0.532121
ENSG00000036530.4	CYP46A1	0.272039	0.64815	0.896953	0.793959
ENSG00000036549.8	ZZZ3	0.0904225	0.671061	0.905481	6.49184
ENSG00000036672.11	USP2	-0.283211	0.455961	0.813887	1.56749
ENSG00000037042.8	TUBG2	0.729065	0.00836235	0.142034	3.8373
ENSG00000037241.3	RPL26L1	-0.135698	0.57233	0.870333	3.37056
ENSG00000037280.11	FLT4	-0.880173	0.174105	0.585765	0.766334
ENSG00000037474.10	NSUN2	0.0829659	0.6407	0.895743	7.07729
ENSG00000037637.6	FBXO42	-0.0875001	0.725343	0.925889	6.16382
ENSG00000037749.7	MFAP3	-0.0414306	0.847163	0.959337	6.40706
ENSG00000037757.9	MRI1	0.0115927	0.964286	0.992494	4.41313
ENSG00000037897.12	METTL1	-0.0822957	0.74526	0.930484	4.89304
ENSG00000037965.4	HOXC8	-0.841881	0.0810202	0.425276	2.51858
ENSG00000038002.4	AGA	-0.13445	0.666945	0.904454	3.12067
ENSG00000038210.9	PI4K2B	-0.543193	0.0684772	0.396445	5.62778
ENSG00000038219.8	BOD1L1	-0.152083	0.540756	0.854813	6.64121
ENSG00000038274.12	MAT2B	0.0999689	0.61179	0.883431	6.06125
ENSG00000038295.3	TLL1	-0.455927	0.245958	0.66263	1.58763
ENSG00000038358.10	EDC4	0.0738828	0.711486	0.921766	6.34065
ENSG00000038382.13	TRIO	0.160464	0.472975	0.823906	6.55282
ENSG00000038427.11	VCAN	0.983008	0.0920151	0.446694	3.89959
ENSG00000038532.10	CLEC16A	0.120927	0.502522	0.836155	5.69762
ENSG00000038945.10	MSR1	1.47249	0.0459746	0.328941	-0.79275
ENSG00000039068.14	CDH1	-0.140247	0.476449	0.82485	8.73786
ENSG00000039123.11	SKIV2L2	0.253006	0.191053	0.604721	6.52923
ENSG00000039139.9	DNAH5	2.19552	0.00331506	0.083397	2.21913
ENSG00000039319.12	ZFYVE16	0.299091	0.102793	0.468098	5.98047
ENSG00000039523.13	FAM65A	-0.293514	0.163627	0.571708	5.8923
ENSG00000039560.9	RAI14	-0.440009	0.0798032	0.421855	5.48062
ENSG00000039650.5	PNKP	0.0957457	0.711633	0.921766	6.09527
ENSG00000039987.2	BEST2	-0.26904	0.558458	0.862701	0.319817
ENSG00000040199.14	PHLPP2	0.0195414	0.931693	0.98385	4.95649
ENSG00000040275.12	SPDL1	-0.395784	0.311152	0.71599	5.18348
ENSG00000040341.13	STAU2	-0.0405106	0.844104	0.95897	5.50858
ENSG00000040487.8	PQLC2	-0.352546	0.195472	0.610549	3.86444
ENSG00000040531.10	CTNS	0.140172	0.531253	0.849442	4.26597
ENSG00000040608.9	RTN4R	0.241603	0.532979	0.849809	2.7244
ENSG00000040633.8	PHF23	0.267043	0.172415	0.583545	6.14454
ENSG00000040731.6	CDH10	0.844959	0.243588	0.660005	0.8674
ENSG00000040933.11	INPP4A	-0.171703	0.50212	0.836023	5.07397
ENSG00000041353.5	RAB27B	-1.66766	8.2251e-05	0.00816862	6.09498
ENSG00000041357.11	PSMA4	0.0338668	0.891111	0.97352	7.2483
ENSG00000041802.6	LSG1	0.306058	0.0890328	0.441632	5.99043
ENSG00000041880.10	PARP3	0.0817886	0.808157	0.949626	3.55438
ENSG00000041982.10	TNC	5.24826	3.13578e-06	0.000993594	6.02815
ENSG00000041988.11	THAP3	0.357463	0.118014	0.494499	3.76473
ENSG00000042062.7	FAM65C	0.645819	0.171214	0.581761	0.516403
ENSG00000042088.9	TDP1	-0.412536	0.115047	0.489567	4.98283
ENSG00000042286.10	AIFM2	0.442078	0.426718	0.799616	2.22411
ENSG00000042317.12	SPATA7	0.164775	0.699423	0.918197	3.03523
ENSG00000042429.6	MED17	-0.325833	0.119503	0.497013	5.58272
ENSG00000042445.9	RETSAT	-0.2039	0.449876	0.812112	5.17736
ENSG00000042493.11	CAPG	-0.383678	0.292912	0.702363	2.31059
ENSG00000042753.7	AP2S1	-0.0904869	0.773049	0.93907	6.7116
ENSG00000042781.8	USH2A	-0.569936	0.358029	0.752839	-0.573677
ENSG00000043093.9	DCUN1D1	0.233962	0.237782	0.65615	5.26537
ENSG00000043143.16	PHF15	-0.268871	0.202815	0.619336	6.13713
ENSG00000043355.6	ZIC2	0.256097	0.485237	0.827994	4.82224
ENSG00000043514.11	TRIT1	0.331415	0.114016	0.487782	4.87362
ENSG00000043591.4	ADRB1	1.07964	0.0300028	0.264422	0.651103
ENSG00000044090.4	CUL7	0.307893	0.247793	0.664252	6.16692
ENSG00000044115.16	CTNNA1	-0.176973	0.387024	0.773935	8.79328
ENSG00000044446.7	PHKA2	-0.00680164	0.977346	0.995713	4.174
ENSG00000044459.10	CNTLN	-0.397091	0.258289	0.673454	4.87659
ENSG00000044524.6	EPHA3	0.824263	0.235599	0.653118	7.94266
ENSG00000044574.7	HSPA5	-0.970051	0.0398679	0.307632	9.8762
ENSG00000046604.8	DSG2	-0.166777	0.548545	0.857693	6.79598
ENSG00000046647.9	GEMIN8	0.268523	0.293516	0.702376	4.17353
ENSG00000046651.10	OFD1	0.185436	0.370126	0.759933	5.32287
ENSG00000046653.10	GPM6B	1.00687	0.00626029	0.122039	3.13171
ENSG00000046889.14	PREX2	0.368821	0.544554	0.856752	1.33816
ENSG00000047056.10	WDR37	0.111402	0.582941	0.873803	5.19058
ENSG00000047188.11	YTHDC2	-0.0390458	0.830612	0.955839	6.43528
ENSG00000047230.10	CTPS2	-0.242506	0.213646	0.631378	5.04109
ENSG00000047249.12	ATP6V1H	-0.106935	0.650515	0.897476	5.7684
ENSG00000047315.10	POLR2B	0.0134182	0.940254	0.984869	7.37855
ENSG00000047346.8	FAM214A	0.542635	0.033114	0.278794	4.87513
ENSG00000047365.7	ARAP2	0.0335904	0.878348	0.969623	4.20566
ENSG00000047410.9	TPR	-0.047081	0.792105	0.945444	8.82193
ENSG00000047457.9	CP	2.0067	0.0147588	0.18803	1.04966
ENSG00000047578.8	KIAA0556	-0.109451	0.598605	0.878301	6.24995
ENSG00000047579.15	DTNBP1	0.128069	0.524234	0.847418	4.16419
ENSG00000047597.5	XK	-0.0390935	0.907896	0.977079	2.23834
ENSG00000047617.10	ANO2	-0.457594	0.51695	0.843802	-1.10842
ENSG00000047621.7	C12orf4	-0.0900356	0.698091	0.917817	5.46613
ENSG00000047634.10	SCML1	-0.920368	0.000144161	0.0120408	5.73568
ENSG00000047644.13	WWC3	0.303252	0.248635	0.665348	3.6836
ENSG00000047648.17	ARHGAP6	0.439101	0.333825	0.733092	6.84501
ENSG00000047662.4	FAM184B	0.342327	0.48677	0.828663	0.776135
ENSG00000047849.17	MAP4	0.108005	0.562448	0.865305	9.11788
ENSG00000047932.9	GOPC	-0.042912	0.817381	0.952432	6.31916
ENSG00000048028.7	USP28	-0.384739	0.149359	0.551314	4.67197
ENSG00000048052.17	HDAC9	0.786647	0.0928237	0.448438	1.70308
ENSG00000048140.13	TSPAN17	0.0687288	0.764276	0.936279	5.87517
ENSG00000048162.15	NOP16	0.0325514	0.891071	0.97352	5.88075
ENSG00000048342.11	CC2D2A	0.370391	0.345496	0.74335	3.23213
ENSG00000048392.7	RRM2B	0.062771	0.802	0.948544	5.95241
ENSG00000048405.5	ZNF800	0.180263	0.433423	0.802689	6.009
ENSG00000048471.9	SNX29	-0.27257	0.191713	0.605247	4.28387
ENSG00000048540.10	LMO3	0.874578	0.055059	0.357892	0.699066
ENSG00000048544.5	MRPS10	0.0713278	0.76993	0.937987	4.99682
ENSG00000048649.9	RSF1	0.029017	0.903007	0.97641	6.38277
ENSG00000048707.9	VPS13D	-0.253192	0.173392	0.584571	7.19845
ENSG00000048828.12	FAM120A	0.0792249	0.623601	0.888088	8.22104
ENSG00000048991.12	R3HDM1	0.0151362	0.937994	0.984866	5.37168
ENSG00000049089.9	COL9A2	-0.615782	0.478281	0.825792	3.44682
ENSG00000049130.9	KITLG	-0.138455	0.752873	0.93246	4.29434
ENSG00000049167.9	ERCC8	0.28921	0.228788	0.646425	3.44686
ENSG00000049192.10	ADAMTS6	0.623399	0.250092	0.666284	-0.219435
ENSG00000049239.8	H6PD	-0.0234379	0.944216	0.985377	5.60762
ENSG00000049245.8	VAMP3	-0.0837214	0.701465	0.918461	5.79525
ENSG00000049246.10	PER3	-1.35441	0.0158394	0.193623	1.38714
ENSG00000049283.13	EPN3	0.444998	0.282366	0.69535	5.88113
ENSG00000049323.11	LTBP1	0.64578	0.0591901	0.37138	3.22758
ENSG00000049449.4	RCN1	-0.380029	0.265909	0.680019	5.98222
ENSG00000049540.12	ELN	3.13318	1.77745e-06	0.000633598	0.0105661
ENSG00000049541.6	RFC2	0.0171932	0.965448	0.993037	6.6953
ENSG00000049618.17	ARID1B	-0.0433813	0.832136	0.955901	6.69429
ENSG00000049656.9	CLPTM1L	0.223679	0.298692	0.706169	6.76005
ENSG00000049759.12	NEDD4L	0.222204	0.462817	0.817787	7.55716
ENSG00000049768.10	FOXP3	0.122967	0.767467	0.937249	0.489692
ENSG00000049769.8	PPP1R3F	0.493216	0.229082	0.646698	3.76164
ENSG00000049860.9	HEXB	-0.21688	0.328327	0.728796	6.55319
ENSG00000049883.10	PTCD2	0.0707435	0.767706	0.937318	3.86965
ENSG00000050030.9	KIAA2022	-1.3059	0.0218176	0.227189	2.58873
ENSG00000050130.13	JKAMP	-0.0850469	0.73765	0.92861	5.59302
ENSG00000050327.10	ARHGEF5	0.568579	0.117885	0.494477	3.7038
ENSG00000050344.8	NFE2L3	0.406841	0.260987	0.675378	4.2441
ENSG00000050393.7	MCUR1	-0.49605	0.0195083	0.214435	6.15667
ENSG00000050405.9	LIMA1	-0.0806859	0.709334	0.921495	6.59012
ENSG00000050426.11	LETMD1	0.350304	0.237899	0.656176	7.08987
ENSG00000050438.12	SLC4A8	-1.15913	0.0256052	0.244565	2.79341
ENSG00000050555.13	LAMC3	1.79987	0.000558285	0.0281426	0.819264
ENSG00000050628.16	PTGER3	-0.794859	0.009466	0.149794	1.74109
ENSG00000050748.13	MAPK9	-0.199482	0.350304	0.74728	6.26423
ENSG00000050820.12	BCAR1	0.30365	0.19596	0.611573	5.96135
ENSG00000051009.6	FAM160A2	-0.0664076	0.75784	0.933896	5.21765
ENSG00000051108.10	HERPUD1	-1.15021	0.000151365	0.0123834	7.59048
ENSG00000051128.14	HOMER3	0.632556	0.0517163	0.346197	3.24671
ENSG00000051180.12	RAD51	-0.501415	0.379713	0.769189	5.04369
ENSG00000051341.9	POLQ	-0.402143	0.445416	0.810498	5.18622
ENSG00000051382.4	PIK3CB	-0.156712	0.548071	0.857422	6.13333
ENSG00000051523.6	CYBA	-0.398239	0.499744	0.834326	0.626839
ENSG00000051596.5	THOC3	-0.0213275	0.942371	0.985184	3.21404
ENSG00000051620.6	HEBP2	0.28624	0.336826	0.735605	8.46145
ENSG00000051825.10	MPHOSPH9	-0.301731	0.255763	0.672786	6.48564
ENSG00000052126.10	PLEKHA5	-0.516082	0.0247377	0.240416	5.7572
ENSG00000052344.11	PRSS8	0.219687	0.57632	0.871355	3.76497
ENSG00000052723.7	SIKE1	0.0684356	0.738022	0.92861	5.93837
ENSG00000052749.9	RRP12	0.211198	0.300286	0.707293	7.03139
ENSG00000052795.8	FNIP2	0.022501	0.924298	0.981789	4.55298
ENSG00000052802.8	MSMO1	-0.270939	0.555522	0.860973	6.93549
ENSG00000052841.10	TTC17	0.203613	0.512611	0.841646	7.03182
ENSG00000052850.5	ALX4	-0.110906	0.764474	0.936279	2.54297
ENSG00000053108.12	FSTL4	0.241581	0.547089	0.857338	2.36075
ENSG00000053254.11	FOXN3	-1.01012	0.00149559	0.0512389	4.60019
ENSG00000053328.8	METTL24	1.30993	0.0537387	0.35357	-0.796502
ENSG00000053371.8	AKR7A2	-0.364129	0.102913	0.468325	5.32821
ENSG00000053372.4	MRTO4	0.0148565	0.940789	0.984869	6.03589
ENSG00000053438.7	NNAT	-0.795426	0.0226945	0.232322	0.999414
ENSG00000053501.8	USE1	0.024914	0.916603	0.979288	4.17872
ENSG00000053524.7	MCF2L2	0.280033	0.678568	0.909549	-0.937762
ENSG00000053702.10	NRIP2	0.166129	0.586796	0.874968	2.76415
ENSG00000053747.11	LAMA3	-1.4809	0.0616958	0.37862	2.54436
ENSG00000053770.7	AP5M1	0.196334	0.283746	0.696381	6.05945
ENSG00000053900.6	ANAPC4	0.181234	0.443576	0.80953	4.92491
ENSG00000053918.11	KCNQ1	-0.369467	0.540244	0.854319	0.393786
ENSG00000054116.7	TRAPPC3	-0.0866054	0.623965	0.888195	5.76186
ENSG00000054118.9	THRAP3	-0.452004	0.00594863	0.118865	8.40557
ENSG00000054148.13	PHPT1	-0.323169	0.142713	0.539098	6.46827
ENSG00000054179.7	ENTPD2	-0.476672	0.165417	0.574186	4.47858
ENSG00000054267.16	ARID4B	0.275537	0.163951	0.571907	7.42139
ENSG00000054277.8	OPN3	-0.0366817	0.930869	0.983696	0.636521
ENSG00000054282.11	SDCCAG8	0.0223296	0.910172	0.977346	5.30197
ENSG00000054392.8	HHAT	0.144398	0.774245	0.939637	2.6167
ENSG00000054523.12	KIF1B	-0.0196028	0.915381	0.979252	7.09075
ENSG00000054598.5	FOXC1	-1.32279	0.0392662	0.305519	1.14421
ENSG00000054611.9	TBC1D22A	-0.0426765	0.825153	0.954869	4.73507
ENSG00000054654.11	SYNE2	-0.533689	0.152516	0.555681	6.72502
ENSG00000054690.9	PLEKHH1	-0.14962	0.754808	0.933144	6.41304
ENSG00000054793.9	ATP9A	-0.324349	0.141397	0.53559	6.63223
ENSG00000054803.3	CBLN4	-0.610554	0.421352	0.7962	-1.12304
ENSG00000054965.6	FAM168A	0.0100926	0.967417	0.993322	6.57116
ENSG00000054967.8	RELT	-0.419402	0.498438	0.834226	3.41447
ENSG00000054983.12	GALC	0.130467	0.68537	0.912888	4.04085
ENSG00000055044.6	NOP58	-0.00883103	0.967513	0.993322	7.16359
ENSG00000055070.12	SZRD1	0.00787437	0.963489	0.99218	7.22529
ENSG00000055118.10	KCNH2	-0.0231351	0.936817	0.984611	5.10221
ENSG00000055130.11	CUL1	0.539569	0.0614246	0.37821	6.7464
ENSG00000055147.13	FAM114A2	0.101057	0.617979	0.88589	5.46652
ENSG00000055163.14	CYFIP2	-0.657946	0.0948584	0.452626	5.78728
ENSG00000055208.13	TAB2	-0.0370259	0.845748	0.959337	5.91061
ENSG00000055211.8	GINM1	-0.432396	0.0235732	0.235638	5.71712
ENSG00000055332.12	EIF2AK2	-0.463254	0.0336389	0.280548	6.56538
ENSG00000055483.15	USP36	0.159992	0.492911	0.832502	6.19043
ENSG00000055609.13	KMT2C	0.304592	0.306686	0.71271	7.71528
ENSG00000055732.8	MCOLN3	-0.989547	0.153763	0.556789	-0.26649
ENSG00000055813.5	CCDC85A	-0.559792	0.378539	0.767615	3.83158
ENSG00000055917.11	PUM2	-0.0755282	0.736538	0.92842	7.76047
ENSG00000055950.12	MRPL43	0.0695853	0.747534	0.931419	5.74596
ENSG00000055955.11	ITIH4	-0.290255	0.639472	0.895177	-0.211906
ENSG00000056050.6	C4orf27	-0.23183	0.428147	0.800106	3.52478
ENSG00000056097.11	ZFR	0.112164	0.53192	0.849681	6.8761
ENSG00000056277.11	ZNF280C	-0.255846	0.319006	0.721259	4.0451
ENSG00000056487.11	PHF21B	1.97803	1.65481e-05	0.00279944	5.41945
ENSG00000056558.6	TRAF1	1.17258	0.00328225	0.0827277	3.2753
ENSG00000056586.11	RC3H2	-0.329916	0.0911009	0.445943	7.01254
ENSG00000056661.9	PCGF2	0.0176368	0.940258	0.984869	5.79259
ENSG00000056736.5	IL17RB	-0.713133	0.0346342	0.285218	4.80079
ENSG00000056972.14	TRAF3IP2	0.784238	0.0669198	0.392518	4.10822
ENSG00000056998.14	GYG2	1.47845	0.0237667	0.236506	0.037754
ENSG00000057019.11	DCBLD2	-0.625053	0.0397519	0.307241	4.58003
ENSG00000057252.8	SOAT1	0.126588	0.693238	0.91566	6.70882
ENSG00000057294.9	PKP2	-0.0680852	0.780854	0.942	4.6982
ENSG00000057468.6	MSH4	0.138523	0.858253	0.962255	1.16714
ENSG00000057608.12	GDI2	-0.0234241	0.911653	0.977525	7.86945
ENSG00000057657.10	PRDM1	1.12185	0.03925	0.305519	0.131584
ENSG00000057663.8	ATG5	0.137508	0.490552	0.831272	5.46744
ENSG00000057704.6	TMCC3	1.43697	0.0131681	0.176773	3.85926
ENSG00000057757.5	PITHD1	-0.117397	0.535499	0.850386	5.7437
ENSG00000057935.9	MTA3	0.301976	0.237334	0.655921	4.63774
ENSG00000058056.4	USP13	-0.0560851	0.812966	0.951083	5.6634
ENSG00000058063.11	ATP11B	0.831714	0.032275	0.275448	5.77453
ENSG00000058085.10	LAMC2	1.29396	0.0210733	0.222692	1.75061
ENSG00000058091.12	CDK14	1.16387	0.0121537	0.170254	6.41639
ENSG00000058262.5	SEC61A1	-0.112799	0.533549	0.849948	8.20958
ENSG00000058272.11	PPP1R12A	-0.00815332	0.965767	0.993037	6.66959
ENSG00000058335.11	RASGRF1	-0.418474	0.562076	0.865305	0.305636
ENSG00000058404.15	CAMK2B	0.680688	0.0627871	0.381277	5.31204
ENSG00000058453.12	CROCC	-0.275778	0.265108	0.67943	5.15269
ENSG00000058600.11	POLR3E	0.269955	0.159728	0.567248	6.25722
ENSG00000058668.10	ATP2B4	1.51441	8.33068e-05	0.00823253	4.63522
ENSG00000058673.11	ZC3H11A	0.171047	0.382342	0.771096	7.46669
ENSG00000058729.6	RIOK2	-0.165384	0.397595	0.78118	4.87507
ENSG00000058799.9	YIPF1	0.107106	0.726517	0.926135	4.73447
ENSG00000058804.10	NDC1	-0.109232	0.737458	0.92861	6.69755
ENSG00000058866.10	DGKG	-1.74939	0.000789783	0.0351128	-0.0122085
ENSG00000059122.12	FLYWCH1	0.0289963	0.900136	0.976148	5.30155
ENSG00000059145.14	UNKL	0.524975	0.079324	0.421502	5.02132
ENSG00000059377.11	TBXAS1	1.12055	0.0271205	0.252863	0.614998
ENSG00000059378.8	PARP12	-0.178728	0.631441	0.890237	3.47312
ENSG00000059573.4	ALDH18A1	0.0590836	0.719621	0.92415	7.44087
ENSG00000059588.5	TARBP1	0.149952	0.622202	0.887552	5.38787
ENSG00000059691.7	PET112	-0.145161	0.533623	0.849998	4.91188
ENSG00000059728.6	MXD1	-0.554201	0.0356006	0.289283	4.75608
ENSG00000059758.3	CDK17	-0.24207	0.311602	0.716306	5.47511
ENSG00000059769.15	DNAJC25	0.369794	0.110684	0.483156	3.95366
ENSG00000059915.12	PSD	0.235571	0.414316	0.79223	5.70485
ENSG00000060069.12	CTDP1	-0.208744	0.304585	0.710857	5.10079
ENSG00000060138.8	YBX3	-0.119566	0.679464	0.909933	8.67541
ENSG00000060140.4	STYK1	-0.0547772	0.839677	0.957534	5.10557
ENSG00000060237.12	WNK1	-0.0794496	0.665299	0.904082	8.35884
ENSG00000060339.9	CCAR1	0.0850149	0.653386	0.898054	7.39152
ENSG00000060491.12	OGFR	-0.205834	0.357285	0.751938	5.62206
ENSG00000060558.3	GNA15	-0.349721	0.608905	0.882393	-0.863306
ENSG00000060642.6	PIGV	0.0171755	0.933391	0.984187	4.8161
ENSG00000060656.15	PTPRU	-0.393555	0.127338	0.511557	5.60926
ENSG00000060688.8	SNRNP40	-0.0632024	0.766413	0.936931	5.88276
ENSG00000060749.10	QSER1	-0.0186543	0.950645	0.987289	6.07189
ENSG00000060762.14	MPC1	0.100917	0.718503	0.924028	4.06374
ENSG00000060971.13	ACAA1	0.373851	0.149962	0.552472	5.34887
ENSG00000060982.10	BCAT1	0.100499	0.879824	0.970085	3.63572
ENSG00000061273.13	HDAC7	0.314259	0.250232	0.666284	6.06533
ENSG00000061455.10	PRDM6	-0.555193	0.28358	0.696381	2.37762
ENSG00000061656.5	SPAG4	0.128576	0.814327	0.951601	1.49376
ENSG00000061676.10	NCKAP1	-0.183655	0.395378	0.77984	8.27879
ENSG00000061794.8	MRPS35	-0.116172	0.582443	0.87372	7.42707
ENSG00000061918.8	GUCY1B3	-1.23427	0.000652051	0.031289	4.08565
ENSG00000061936.5	SFSWAP	-0.0488734	0.79422	0.946181	6.52285
ENSG00000061938.12	TNK2	-0.0642387	0.874583	0.968142	5.29163
ENSG00000061987.10	MON2	0.205093	0.384822	0.772585	6.96013
ENSG00000062038.9	CDH3	0.0174436	0.947631	0.986525	6.18808
ENSG00000062194.11	GPBP1	0.0677547	0.695083	0.916374	6.88698
ENSG00000062282.10	DGAT2	-0.430998	0.307307	0.71331	4.11539
ENSG00000062370.12	ZNF112	0.102612	0.690458	0.914229	3.12825
ENSG00000062485.14	CS	-0.063799	0.784616	0.943581	8.81901
ENSG00000062524.11	LTK	0.397035	0.529663	0.848534	-0.508474
ENSG00000062582.9	MRPS24	0.100653	0.851693	0.959811	-0.398444
ENSG00000062598.13	ELMO2	-0.113329	0.579821	0.872616	5.65179
ENSG00000062650.13	WAPAL	0.00956022	0.959607	0.990974	6.83588
ENSG00000062716.6	VMP1	0.342826	0.266811	0.680564	6.06374
ENSG00000062725.5	APPBP2	0.212019	0.286259	0.697291	5.74387
ENSG00000062822.8	POLD1	-0.252579	0.416306	0.793043	6.30784
ENSG00000063015.15	SEZ6	-0.17382	0.741424	0.92887	5.85431
ENSG00000063046.13	EIF4B	-0.0227079	0.940709	0.984869	8.75247
ENSG00000063127.11	SLC6A16	0.414608	0.299027	0.706169	2.37907
ENSG00000063169.6	GLTSCR1	0.147194	0.57212	0.870212	4.77801
ENSG00000063176.11	SPHK2	0.0283093	0.900353	0.976148	4.53883
ENSG00000063177.8	RPL18	0.210492	0.37268	0.762784	9.35711
ENSG00000063180.4	CA11	0.0537645	0.853113	0.959908	5.18312
ENSG00000063241.3	ISOC2	-0.109246	0.742078	0.92905	6.57788
ENSG00000063244.8	U2AF2	0.0707076	0.696603	0.917401	8.16323
ENSG00000063245.10	EPN1	0.131137	0.495244	0.832795	6.94911
ENSG00000063322.9	MED29	-0.071456	0.674556	0.907014	6.16707
ENSG00000063438.12	AHRR	1.25711	0.00511918	0.108847	2.28876
ENSG00000063587.12	ZNF275	-0.300209	0.14533	0.544907	5.29713
ENSG00000063601.12	MTMR1	0.0723755	0.712179	0.921766	6.0418
ENSG00000063660.4	GPC1	0.226258	0.478423	0.825792	4.38638
ENSG00000063761.11	ADCK1	0.487966	0.0762363	0.414667	3.47135
ENSG00000063854.8	HAGH	-0.447263	0.0141513	0.184152	5.82328
ENSG00000063978.11	RNF4	-0.161568	0.367106	0.75855	6.35277
ENSG00000064012.17	CASP8	-0.98498	0.0399519	0.307804	3.45236
ENSG00000064042.13	LIMCH1	0.638569	0.0471706	0.332902	7.80076
ENSG00000064102.10	ASUN	0.39209	0.0947114	0.45252	5.97982
ENSG00000064115.6	TM7SF3	0.395533	0.0286512	0.259806	7.01867
ENSG00000064195.7	DLX3	2.69763	0.00747231	0.1333	2.72296
ENSG00000064199.2	SPA17	0.155493	0.618617	0.88593	4.02791
ENSG00000064201.11	TSPAN32	1.27144	0.0678272	0.394364	0.254775
ENSG00000064205.6	WISP2	0.55903	0.433522	0.802689	-0.56857
ENSG00000064225.8	ST3GAL6	-0.32816	0.46495	0.818704	0.717722
ENSG00000064270.8	ATP2C2	-0.408832	0.445431	0.810498	1.05251
ENSG00000064300.4	NGFR	-0.424486	0.436804	0.804423	-0.379877
ENSG00000064309.10	CDON	-0.53086	0.229296	0.646698	2.82586
ENSG00000064313.7	TAF2	-0.129157	0.525495	0.847418	5.94371
ENSG00000064393.11	HIPK2	0.80593	0.00750178	0.133706	8.20212
ENSG00000064419.9	TNPO3	0.385313	0.104378	0.471186	6.86736
ENSG00000064490.9	RFXANK	-0.0375839	0.852114	0.959883	4.5606
ENSG00000064545.10	TMEM161A	0.0817948	0.665827	0.904082	5.11866
ENSG00000064547.9	LPAR2	1.06965	0.0342737	0.283229	2.91209
ENSG00000064601.12	CTSA	-0.0935126	0.740071	0.928729	5.9006
ENSG00000064607.12	SUGP2	0.0213125	0.923579	0.981311	6.61228
ENSG00000064651.9	SLC12A2	0.335876	0.603822	0.880782	7.64029
ENSG00000064652.6	SNX24	-0.160889	0.554607	0.86077	3.09022
ENSG00000064666.10	CNN2	-0.377561	0.391542	0.776869	4.42745
ENSG00000064687.8	ABCA7	-0.119502	0.628928	0.889806	6.3168
ENSG00000064692.14	SNCAIP	0.246755	0.550122	0.857933	0.800229
ENSG00000064703.7	DDX20	0.0162326	0.93771	0.984721	5.40589
ENSG00000064726.5	BTBD1	0.0473443	0.816689	0.952416	7.02171
ENSG00000064763.6	FAR2	-0.229245	0.385591	0.772809	6.42513
ENSG00000064787.8	BCAS1	-2.04607	0.00508293	0.108519	3.09105
ENSG00000064932.11	SBNO2	-0.0106559	0.961113	0.99152	7.07032
ENSG00000064933.12	PMS1	0.166348	0.438537	0.80601	5.57218
ENSG00000064961.14	HMG20B	-0.199334	0.440459	0.807609	8.29627
ENSG00000064989.8	CALCRL	1.1921	0.0464765	0.330754	0.794882
ENSG00000064995.12	TAF11	-0.113656	0.593115	0.876571	5.28682
ENSG00000064999.12	ANKS1A	0.350087	0.110795	0.483235	5.98038
ENSG00000065000.11	AP3D1	-0.0278441	0.889575	0.973186	8.18858
ENSG00000065029.10	ZNF76	-0.0486177	0.807524	0.949626	6.26978
ENSG00000065054.9	SLC9A3R2	0.208231	0.47736	0.825026	6.22553
ENSG00000065057.3	NTHL1	0.312681	0.182684	0.592767	4.38748
ENSG00000065060.12	UHRF1BP1	-0.275051	0.370591	0.760603	6.54288
ENSG00000065135.7	GNAI3	-0.0982518	0.695108	0.916374	6.76634
ENSG00000065150.14	IPO5	-0.0947782	0.643456	0.895859	8.34133
ENSG00000065154.7	OAT	0.0538134	0.848791	0.959535	6.12331
ENSG00000065183.11	WDR3	0.508702	0.0196152	0.214435	6.5832
ENSG00000065243.14	PKN2	0.0400315	0.820054	0.953377	6.77466
ENSG00000065268.6	WDR18	-0.173001	0.45411	0.813146	5.60204
ENSG00000065308.4	TRAM2	-1.23617	8.37397e-05	0.00823454	4.61196
ENSG00000065320.4	NTN1	0.612517	0.209791	0.62777	0.785943
ENSG00000065328.12	MCM10	-0.443123	0.430414	0.80131	5.80068
ENSG00000065357.15	DGKA	0.137656	0.639492	0.895177	4.90069
ENSG00000065361.10	ERBB3	0.0571691	0.854697	0.960625	8.20168
ENSG00000065413.12	ANKRD44	-0.265826	0.38694	0.773935	2.58038
ENSG00000065427.10	KARS	0.240696	0.30558	0.71197	7.39692
ENSG00000065457.6	ADAT1	-0.0341305	0.889375	0.973126	5.52476
ENSG00000065485.13	PDIA5	-0.438922	0.0637031	0.383487	4.91871
ENSG00000065491.8	TBC1D22B	-0.123115	0.602947	0.880406	4.20026
ENSG00000065518.7	NDUFB4	0.189484	0.5501	0.857933	6.75462
ENSG00000065526.6	SPEN	0.272893	0.256882	0.672893	7.8902
ENSG00000065534.14	MYLK	1.12221	0.0127702	0.173887	3.20571
ENSG00000065548.13	ZC3H15	0.0236452	0.900314	0.976148	6.6159
ENSG00000065559.10	MAP2K4	-0.0544789	0.819283	0.953056	5.44489
ENSG00000065600.8	TMEM206	-0.0751719	0.728447	0.926198	3.86911
ENSG00000065609.10	SNAP91	-0.216723	0.418913	0.794677	5.49781
ENSG00000065613.9	SLK	-0.266268	0.131365	0.518142	7.27722
ENSG00000065615.9	CYB5R4	-0.0312874	0.889572	0.973186	3.54418
ENSG00000065618.12	COL17A1	1.80987	0.0156584	0.193057	-0.684353
ENSG00000065621.10	GSTO2	0.14104	0.630464	0.889907	6.26013
ENSG00000065665.16	SEC61A2	0.207464	0.344648	0.742566	3.78103
ENSG00000065717.10	TLE2	-0.118658	0.668077	0.904756	4.81554
ENSG00000065802.7	ASB1	0.114453	0.570936	0.869014	5.25392
ENSG00000065809.9	FAM107B	-0.0235029	0.940636	0.984869	5.12711
ENSG00000065833.7	ME1	2.24248	0.00107819	0.0420367	3.79352
ENSG00000065882.11	TBC1D1	-0.279701	0.23571	0.653326	5.6254
ENSG00000065883.10	CDK13	0.205104	0.390306	0.776612	6.76411
ENSG00000065911.7	MTHFD2	-0.844255	0.0433672	0.319432	7.81689
ENSG00000065923.5	SLC9A7	-0.0661906	0.855725	0.960954	3.63764
ENSG00000065970.4	FOXJ2	-0.550704	0.0158351	0.193623	6.13856
ENSG00000065978.13	YBX1	0.091829	0.745011	0.930484	8.10636
ENSG00000065989.11	PDE4A	0.00367803	0.988973	0.997746	4.41888
ENSG00000066027.7	PPP2R5A	0.224794	0.315236	0.71854	5.77968
ENSG00000066032.14	CTNNA2	-2.25887	0.00158886	0.0528614	4.33683
ENSG00000066044.9	ELAVL1	-0.0254817	0.89654	0.975576	7.23302
ENSG00000066084.8	DIP2B	0.182354	0.303312	0.709564	7.1816
ENSG00000066117.10	SMARCD1	-0.0976759	0.588482	0.874968	7.02871
ENSG00000066135.8	KDM4A	0.163919	0.447757	0.811155	6.00133
ENSG00000066136.15	NFYC	-0.206473	0.335108	0.733972	5.61565
ENSG00000066185.8	ZMYND12	-0.0593596	0.895011	0.975208	0.627892
ENSG00000066230.6	SLC9A3	0.796965	0.297371	0.705337	0.958779
ENSG00000066248.10	NGEF	-0.232028	0.509685	0.839902	2.71855
ENSG00000066279.12	ASPM	-0.534208	0.348505	0.745906	7.14923
ENSG00000066322.8	ELOVL1	-0.0147859	0.954799	0.988883	6.82831
ENSG00000066336.7	SPI1	-0.0109637	0.986143	0.997076	0.0582336
ENSG00000066379.10	ZNRD1	0.287069	0.229459	0.646698	3.30055
ENSG00000066382.12	MPPED2	-0.183038	0.631984	0.890412	1.02616
ENSG00000066422.4	ZBTB11	0.10491	0.588401	0.874968	6.2892
ENSG00000066427.17	ATXN3	-0.201701	0.443189	0.809278	4.95672
ENSG00000066455.8	GOLGA5	-0.328051	0.0800392	0.422269	5.89693
ENSG00000066557.5	LRRC40	-0.0276017	0.91117	0.977488	5.6696
ENSG00000066583.7	ISOC1	-0.462756	0.0601465	0.374129	5.56392
ENSG00000066629.12	EML1	0.0308117	0.940351	0.984869	4.13948
ENSG00000066651.13	TRMT11	-0.17125	0.51529	0.84321	4.16571
ENSG00000066654.8	THUMPD1	-0.0229144	0.897324	0.975576	6.47561
ENSG00000066697.10	MSANTD3	-0.28137	0.242849	0.659708	3.77058
ENSG00000066735.10	KIF26A	-1.92111	0.0114725	0.164805	0.846348
ENSG00000066739.7	ATG2B	0.100321	0.720416	0.924264	6.25496
ENSG00000066777.4	ARFGEF1	0.0386039	0.83454	0.95671	6.81802
ENSG00000066827.11	ZFAT	0.0327217	0.882073	0.970509	3.9473
ENSG00000066855.11	MTFR1	-0.450121	0.0389676	0.305129	5.67237
ENSG00000066923.13	STAG3	0.73371	0.0268918	0.252023	3.3698
ENSG00000066926.6	FECH	-0.479585	0.0867221	0.43882	7.32366
ENSG00000066933.11	MYO9A	-0.631927	0.00277633	0.0743907	6.57182
ENSG00000067048.12	DDX3Y	-0.265	0.26592	0.680019	6.65381
ENSG00000067057.12	PFKP	0.597816	0.359513	0.754241	3.60989
ENSG00000067064.6	IDI1	-0.589035	0.125907	0.508879	7.00545
ENSG00000067066.12	SP100	-1.93404	0.0341008	0.282574	1.22288
ENSG00000067082.10	KLF6	-1.41638	0.0014573	0.050243	6.28964
ENSG00000067113.12	PPAP2A	0.866132	0.0926778	0.448123	6.37226
ENSG00000067141.12	NEO1	0.0841669	0.696668	0.917401	5.93437
ENSG00000067167.3	TRAM1	-0.506562	0.0163649	0.196663	6.48813
ENSG00000067177.10	PHKA1	-0.209873	0.252585	0.668801	5.61458
ENSG00000067182.3	TNFRSF1A	-0.0567009	0.769607	0.937987	6.23527
ENSG00000067191.11	CACNB1	0.135059	0.626253	0.889074	2.84626
ENSG00000067208.10	EVI5	0.103298	0.656564	0.899513	4.3943
ENSG00000067221.9	STOML1	-0.161917	0.571411	0.869399	3.44544
ENSG00000067225.13	PKM	-0.00821638	0.972716	0.994895	9.331
ENSG00000067248.5	DHX29	-0.041035	0.8639	0.964327	5.86794
ENSG00000067334.9	DNTTIP2	-0.193196	0.368099	0.758856	6.53127
ENSG00000067365.10	METTL22	0.0640792	0.77837	0.940794	3.81159
ENSG00000067369.9	TP53BP1	0.146017	0.46551	0.819022	6.75066
ENSG00000067445.16	TRO	-1.16657	0.041382	0.313023	-0.335392
ENSG00000067533.5	RRP15	-0.0598774	0.757542	0.933896	6.81066
ENSG00000067560.6	RHOA	-0.277461	0.174285	0.585899	8.90163
ENSG00000067596.6	DHX8	-0.249288	0.181307	0.591671	6.50794
ENSG00000067601.6	PMS2P4	-0.0872681	0.80529	0.948894	1.34059
ENSG00000067606.11	PRKCZ	0.479658	0.0817288	0.426459	4.24829
ENSG00000067646.7	ZFY	-0.074095	0.774652	0.939751	4.69882
ENSG00000067704.8	IARS2	-0.0713847	0.752657	0.93246	8.25078
ENSG00000067715.9	SYT1	0.382135	0.387045	0.773935	1.50155
ENSG00000067798.9	NAV3	0.461848	0.388134	0.774537	0.221947
ENSG00000067829.14	IDH3G	-0.0511043	0.783802	0.943	6.01659
ENSG00000067836.8	ROGDI	0.421761	0.210037	0.627857	5.26353
ENSG00000067840.8	PDZD4	0.475523	0.287193	0.698178	4.91623
ENSG00000067842.13	ATP2B3	2.65352	0.00476822	0.104483	0.779907
ENSG00000067900.6	ROCK1	-0.318616	0.0578186	0.366637	6.80363
ENSG00000067955.9	CBFB	0.0052906	0.981733	0.996281	5.97351
ENSG00000067992.8	PDK3	-0.742998	0.0239332	0.237096	3.07302
ENSG00000068001.9	HYAL2	0.175746	0.463616	0.817822	5.14449
ENSG00000068024.12	HDAC4	0.436412	0.233153	0.651028	3.53616
ENSG00000068028.13	RASSF1	0.175085	0.493917	0.83255	4.68831
ENSG00000068078.13	FGFR3	0.0701559	0.833958	0.95671	6.49646
ENSG00000068079.3	IFI35	0.0893383	0.757089	0.933651	2.28454
ENSG00000068097.10	HEATR6	0.102373	0.608629	0.882284	4.75554
ENSG00000068120.10	COASY	0.232398	0.295839	0.70501	6.92772
ENSG00000068137.10	PLEKHH3	-0.193646	0.428235	0.800114	6.32879
ENSG00000068305.13	MEF2A	-0.177989	0.497326	0.833303	5.69377
ENSG00000068308.9	OTUD5	-0.0532328	0.78607	0.944079	6.03644
ENSG00000068323.12	TFE3	-0.0390609	0.847422	0.959337	5.0287
ENSG00000068354.11	TBC1D25	0.0390306	0.861565	0.963533	3.93437
ENSG00000068366.15	ACSL4	-0.732997	0.0924501	0.448043	3.60603
ENSG00000068383.14	INPP5A	2.77515	0.00021164	0.0152549	5.22455
ENSG00000068394.9	GPKOW	-0.237654	0.271298	0.685524	5.13176
ENSG00000068400.9	GRIPAP1	-0.140179	0.519409	0.845231	6.56798
ENSG00000068438.10	FTSJ1	-0.124109	0.605946	0.881283	5.60928
ENSG00000068489.8	PRR11	-0.596598	0.319392	0.721279	4.24135
ENSG00000068615.12	REEP1	-1.83813	0.000580183	0.0288818	2.75933
ENSG00000068650.14	ATP11A	0.890283	0.136425	0.527767	0.0445403
ENSG00000068654.11	POLR1A	0.153836	0.40207	0.784153	7.22273
ENSG00000068697.6	LAPTM4A	0.139602	0.502009	0.836023	6.65991
ENSG00000068724.11	TTC7A	-0.101215	0.726656	0.926135	3.10429
ENSG00000068745.10	IP6K2	0.311657	0.118781	0.496048	6.66722
ENSG00000068784.8	SRBD1	-0.122324	0.622814	0.887691	3.94711
ENSG00000068793.13	CYFIP1	0.411983	0.0806922	0.424396	7.68869
ENSG00000068796.12	KIF2A	-0.0549573	0.830451	0.955806	5.88056
ENSG00000068831.14	RASGRP2	0.77539	0.132255	0.520005	1.31844
ENSG00000068878.10	PSME4	0.0110758	0.964548	0.992549	7.06727
ENSG00000068885.10	IFT80	-0.48307	0.13645	0.527767	4.32561
ENSG00000068903.15	SIRT2	0.155443	0.443787	0.809548	5.6679
ENSG00000068912.9	ERLEC1	-0.254783	0.230146	0.64781	5.46996
ENSG00000068971.9	PPP2R5B	0.445589	0.184412	0.594513	4.60194
ENSG00000068976.9	PYGM	-0.269889	0.592615	0.876501	0.228718
ENSG00000069011.11	PITX1	0.0956754	0.735755	0.928159	4.21274
ENSG00000069020.14	MAST4	0.160688	0.55586	0.861095	4.47708
ENSG00000069122.14	GPR116	2.93483	0.0100996	0.154548	0.962736
ENSG00000069188.12	SDK2	0.473231	0.470016	0.821742	-0.682628
ENSG00000069248.9	NUP133	0.0560206	0.751478	0.93226	7.26759
ENSG00000069275.12	NUCKS1	-0.329919	0.0926199	0.448123	9.79386
ENSG00000069329.11	VPS35	-0.103855	0.592194	0.876363	7.61463
ENSG00000069345.7	DNAJA2	-0.013444	0.943957	0.985377	6.85689
ENSG00000069399.8	BCL3	0.861817	0.0626065	0.380789	4.20125
ENSG00000069424.10	KCNAB2	0.848025	0.00632486	0.122564	3.95184
ENSG00000069431.6	ABCC9	-1.36452	0.0887392	0.441309	-0.24872
ENSG00000069482.6	GAL	1.79896	0.000265724	0.0175642	4.2541
ENSG00000069493.10	CLEC2D	0.398268	0.337729	0.73632	1.2788
ENSG00000069509.5	FUNDC1	0.223531	0.364459	0.757058	4.01389
ENSG00000069667.11	RORA	-0.608086	0.211364	0.629865	1.38456
ENSG00000069696.6	DRD4	0.92616	0.0192532	0.2134	2.35698
ENSG00000069702.6	TGFBR3	-0.284857	0.449011	0.811342	2.02808
ENSG00000069712.9	KIAA1107	-0.239557	0.311778	0.716439	3.51913
ENSG00000069764.5	PLA2G10	0.00551759	0.9927	0.997746	-0.716358
ENSG00000069812.7	HES2	0.349173	0.58788	0.874968	1.14253
ENSG00000069849.6	ATP1B3	-0.154431	0.569203	0.868024	5.51103
ENSG00000069869.11	NEDD4	0.50078	0.165881	0.574617	4.58033
ENSG00000069943.5	PIGB	-0.0452116	0.837636	0.957065	3.90376
ENSG00000069956.7	MAPK6	-0.360737	0.19385	0.608079	6.53058
ENSG00000069966.14	GNB5	-0.53861	0.0515986	0.34587	2.91812
ENSG00000069974.11	RAB27A	-1.01112	0.00675419	0.12631	3.9657
ENSG00000069998.8	CECR5	0.181859	0.428066	0.800106	5.82631
ENSG00000070010.14	UFD1L	-0.291277	0.220349	0.638502	6.20376
ENSG00000070018.4	LRP6	0.444545	0.0917795	0.446457	6.29797
ENSG00000070019.3	GUCY2C	0.258138	0.698399	0.917865	0.239953
ENSG00000070031.3	SCT	1.3768	0.00652571	0.124555	0.0961313
ENSG00000070047.7	PHRF1	-0.223817	0.288973	0.699236	6.71627
ENSG00000070061.10	IKBKAP	0.0476313	0.798976	0.947392	6.62049
ENSG00000070081.11	NUCB2	-1.08384	1.83963e-05	0.00291164	6.91569
ENSG00000070087.9	PFN2	-0.117801	0.566735	0.867168	6.80109
ENSG00000070159.9	PTPN3	-0.344014	0.0530678	0.35124	6.14941
ENSG00000070182.13	SPTB	0.0574777	0.865445	0.964871	3.86825
ENSG00000070190.8	DAPP1	-0.909473	0.181898	0.592245	-0.661484
ENSG00000070214.11	SLC44A1	-0.0985044	0.69071	0.914381	6.51903
ENSG00000070269.9	TMEM260	-0.0482607	0.870055	0.96608	5.15724
ENSG00000070366.9	SMG6	-0.040181	0.829613	0.955555	5.69611
ENSG00000070367.11	EXOC5	-0.162056	0.42384	0.79874	6.47479
ENSG00000070371.11	CLTCL1	0.0869255	0.788326	0.944901	4.4658
ENSG00000070388.7	FGF22	0.162353	0.684298	0.912001	1.57382
ENSG00000070404.5	FSTL3	0.365524	0.286081	0.697122	3.99315
ENSG00000070413.14	DGCR2	0.123924	0.503853	0.837288	6.33021
ENSG00000070423.13	RNF126	-0.12028	0.543243	0.85637	6.0437
ENSG00000070444.10	MNT	-0.245381	0.368939	0.759022	5.62441
ENSG00000070476.10	ZXDC	-0.174089	0.4333	0.802689	5.49684
ENSG00000070495.10	JMJD6	-0.169106	0.4531	0.812983	5.11621
ENSG00000070501.7	POLB	0.130949	0.50867	0.839641	4.84365
ENSG00000070526.10	ST6GALNAC1	-0.578273	0.405524	0.786562	-0.838839
ENSG00000070540.8	WIPI1	0.0786945	0.831388	0.955875	3.23338
ENSG00000070601.5	FRMPD1	1.67978	0.00359639	0.0872747	1.9351
ENSG00000070610.10	GBA2	0.328717	0.138783	0.532297	7.01896
ENSG00000070614.10	NDST1	0.451642	0.0367083	0.294286	7.10021
ENSG00000070669.12	ASNS	-0.286304	0.494369	0.832795	7.78439
ENSG00000070718.7	AP3M2	0.34629	0.165133	0.573784	5.36632
ENSG00000070731.5	ST6GALNAC2	-1.16753	0.00755276	0.133987	1.99564
ENSG00000070756.9	PABPC1	0.0786823	0.781501	0.942105	10.1755
ENSG00000070759.12	TESK2	-1.63256	3.03464e-09	7.57218e-06	3.18442
ENSG00000070761.3	C16orf80	-0.169385	0.495222	0.832795	5.11553
ENSG00000070770.4	CSNK2A2	-0.0190672	0.920291	0.980459	6.54602
ENSG00000070778.8	PTPN21	-0.515447	0.348917	0.746045	4.17327
ENSG00000070785.12	EIF2B3	-0.0848025	0.746948	0.931094	4.57332
ENSG00000070814.13	TCOF1	-0.0655933	0.80606	0.949209	7.37273
ENSG00000070831.11	CDC42	-0.0290917	0.875351	0.96829	7.1852
ENSG00000070882.8	OSBPL3	-0.22018	0.536518	0.850807	5.44185
ENSG00000070886.6	EPHA8	0.915942	0.121309	0.500762	0.408619
ENSG00000070950.5	RAD18	-0.509358	0.0886487	0.441092	5.58845
ENSG00000070961.10	ATP2B1	0.475412	0.0874578	0.440089	7.20802
ENSG00000071051.9	NCK2	-0.296041	0.242465	0.659233	3.85702
ENSG00000071054.11	MAP4K4	0.165306	0.563298	0.865305	6.9395
ENSG00000071073.8	MGAT4A	-0.0951254	0.80329	0.948742	4.01835
ENSG00000071082.6	RPL31	0.43763	0.106301	0.475356	8.3063
ENSG00000071127.12	WDR1	0.153179	0.51796	0.844098	7.81174
ENSG00000071189.17	SNX13	0.526911	0.0118272	0.167798	6.55963
ENSG00000071205.7	ARHGAP10	-0.233755	0.524905	0.847418	2.74898
ENSG00000071242.7	RPS6KA2	-1.74341	0.00861065	0.143588	1.76028
ENSG00000071243.11	ING3	0.12925	0.645338	0.895975	5.06587
ENSG00000071246.6	VASH1	-0.647722	0.198854	0.615907	2.30344
ENSG00000071462.7	WBSCR22	0.405748	0.0444866	0.323628	6.94933
ENSG00000071537.9	SEL1L	-0.512479	0.0428303	0.317246	7.77861
ENSG00000071539.9	TRIP13	-0.256533	0.591941	0.876174	5.72035
ENSG00000071553.12	ATP6AP1	-0.0197328	0.935383	0.98444	7.48613
ENSG00000071564.10	TCF3	0.145205	0.507632	0.839641	7.01854
ENSG00000071575.7	TRIB2	-1.36138	0.0842172	0.433284	-0.600089
ENSG00000071626.12	DAZAP1	-0.117087	0.540175	0.854319	8.1817
ENSG00000071655.13	MBD3	-0.0476588	0.815899	0.952362	6.65225
ENSG00000071794.11	HLTF	-0.139939	0.526271	0.847622	7.69084
ENSG00000071859.10	FAM50A	-0.197604	0.364616	0.757226	6.09537
ENSG00000071889.12	FAM3A	-0.186798	0.368931	0.759022	5.40618
ENSG00000071894.10	CPSF1	0.265546	0.155685	0.560126	7.21136
ENSG00000071994.6	PDCD2	0.278194	0.179931	0.590173	6.43551
ENSG00000072041.12	SLC6A15	-0.512549	0.155048	0.559284	4.98329
ENSG00000072042.8	RDH11	-0.373134	0.321627	0.724092	8.40446
ENSG00000072062.9	PRKACA	-0.265358	0.297347	0.705337	6.92796
ENSG00000072071.12	LPHN1	0.00673343	0.974259	0.995096	6.95591
ENSG00000072110.9	ACTN1	0.0212094	0.921992	0.98068	7.19292
ENSG00000072121.11	ZFYVE26	-0.109064	0.694147	0.916015	5.31953
ENSG00000072133.6	RPS6KA6	0.0918884	0.740752	0.928811	4.70055
ENSG00000072134.11	EPN2	0.214872	0.367702	0.758787	5.59072
ENSG00000072135.8	PTPN18	0.0566509	0.785247	0.943796	7.63428
ENSG00000072195.10	SPEG	2.35509	2.9934e-05	0.00429887	1.37715
ENSG00000072201.9	LNX1	0.476923	0.180286	0.590642	2.76264
ENSG00000072210.14	ALDH3A2	-0.158972	0.519802	0.845489	10.7522
ENSG00000072274.8	TFRC	-0.156623	0.683439	0.911833	8.34214
ENSG00000072310.12	SREBF1	-0.730972	0.139114	0.532297	7.8713
ENSG00000072364.8	AFF4	-0.162804	0.489649	0.830519	7.70375
ENSG00000072401.10	UBE2D1	0.0881592	0.67665	0.908283	4.59356
ENSG00000072415.4	MPP5	0.0198665	0.906971	0.977079	5.83127
ENSG00000072422.12	RHOBTB1	0.9567	0.033325	0.279374	3.54301
ENSG00000072501.13	SMC1A	-0.301042	0.284061	0.696381	8.60965
ENSG00000072506.8	HSD17B10	0.285378	0.291461	0.701455	6.47395
ENSG00000072518.16	MARK2	-0.0159263	0.927651	0.982635	7.00455
ENSG00000072571.15	HMMR	-0.451861	0.463478	0.817822	6.30344
ENSG00000072609.13	CHFR	-0.171553	0.36904	0.759022	5.90273
ENSG00000072657.4	TRHDE	-1.09977	0.0188664	0.211223	3.03104
ENSG00000072682.14	P4HA2	-0.0515078	0.906493	0.977079	3.04623
ENSG00000072736.14	NFATC3	-0.0762124	0.722761	0.924961	5.12398
ENSG00000072756.12	TRNT1	0.438246	0.0294677	0.2629	5.19828
ENSG00000072778.15	ACADVL	0.0933764	0.671868	0.90568	8.8551
ENSG00000072786.8	STK10	0.344066	0.160181	0.567798	4.52502
ENSG00000072803.13	FBXW11	0.168814	0.368006	0.758856	6.28335
ENSG00000072818.7	ACAP1	0.288443	0.575969	0.871353	2.43891
ENSG00000072832.10	CRMP1	0.440226	0.268608	0.682443	3.28523
ENSG00000072840.8	EVC	0.230479	0.565976	0.867077	5.14972
ENSG00000072849.6	DERL2	-0.318072	0.178202	0.589256	5.51021
ENSG00000072858.6	SIDT1	0.979237	0.0361307	0.291698	0.712862
ENSG00000072864.8	NDE1	-0.591949	0.085107	0.435096	4.77166
ENSG00000072954.2	TMEM38A	1.36234	0.00215003	0.0632091	1.6993
ENSG00000072958.4	AP1M1	-0.0669056	0.80195	0.948541	5.38247
ENSG00000073008.10	PVR	0.00446971	0.981431	0.996281	6.64965
ENSG00000073009.8	IKBKG	0.410788	0.370848	0.760888	0.983508
ENSG00000073050.7	XRCC1	-0.44201	0.0464981	0.330789	5.0937
ENSG00000073060.11	SCARB1	0.0699355	0.742189	0.92905	7.85358
ENSG00000073067.9	CYP2W1	0.859253	0.249302	0.665495	0.305503
ENSG00000073111.9	MCM2	-0.491998	0.259977	0.675072	7.58001
ENSG00000073146.11	MOV10L1	-0.779906	0.0471889	0.332902	3.14586
ENSG00000073150.9	PANX2	0.0412014	0.914956	0.978954	4.10719
ENSG00000073169.9	SELO	0.163087	0.427735	0.800011	5.69743
ENSG00000073331.13	ALPK1	-0.512808	0.0971945	0.45696	4.61698
ENSG00000073350.9	LLGL2	0.0986737	0.625831	0.888992	7.28703
ENSG00000073417.10	PDE8A	-0.308866	0.163712	0.571708	5.63851
ENSG00000073464.7	CLCN4	0.304571	0.291026	0.701118	3.33133
ENSG00000073536.13	NLE1	0.0803616	0.720157	0.924264	5.21847
ENSG00000073578.12	SDHA	0.0714783	0.735503	0.928159	6.86443
ENSG00000073584.14	SMARCE1	-0.0099646	0.95965	0.990974	6.28551
ENSG00000073605.14	GSDMB	0.345766	0.35079	0.74728	4.39704
ENSG00000073614.7	KDM5A	-0.127858	0.481163	0.826804	7.17095
ENSG00000073670.9	ADAM11	0.730462	0.0512167	0.345168	3.49982
ENSG00000073711.6	PPP2R3A	-0.550895	0.0342636	0.283229	3.48232
ENSG00000073712.9	FERMT2	-0.0719582	0.745929	0.930484	5.51658
ENSG00000073756.7	PTGS2	-0.825839	0.12246	0.502324	0.744506
ENSG00000073792.11	IGF2BP2	1.35514	0.0034978	0.0858832	3.97765
ENSG00000073803.9	MAP3K13	-0.133395	0.516881	0.843802	5.37656
ENSG00000073849.10	ST6GAL1	1.28735	0.0030438	0.0788848	5.33387
ENSG00000073910.15	FRY	0.323901	0.517724	0.84399	5.65105
ENSG00000073921.13	PICALM	-0.0455461	0.783579	0.942845	7.42278
ENSG00000073969.14	NSF	0.183999	0.461374	0.816557	5.91809
ENSG00000074047.16	GLI2	1.64091	0.0392521	0.305519	-0.826774
ENSG00000074054.13	CLASP1	0.0155894	0.935249	0.98444	5.86392
ENSG00000074071.9	MRPS34	0.055664	0.7998	0.947775	7.16982
ENSG00000074181.4	NOTCH3	1.11298	0.0116021	0.165613	6.13919
ENSG00000074201.4	CLNS1A	0.121905	0.532154	0.849681	6.93701
ENSG00000074211.9	PPP2R2C	-1.34263	0.035855	0.290478	3.40596
ENSG00000074219.9	TEAD2	0.459292	0.263744	0.678249	5.89222
ENSG00000074266.13	EED	-0.0895245	0.755984	0.933615	4.80188
ENSG00000074276.6	CDHR2	0.915801	0.0527887	0.350101	2.33068
ENSG00000074317.6	SNCB	-2.00256	0.00049601	0.0264327	0.749343
ENSG00000074319.8	TSG101	-0.0872518	0.633272	0.891556	6.34488
ENSG00000074356.12	C17orf85	0.0795544	0.694761	0.91622	6.05524
ENSG00000074370.13	ATP2A3	-0.411399	0.435806	0.803522	0.900509
ENSG00000074410.9	CA12	1.62344	0.0196762	0.214515	4.17974
ENSG00000074416.9	MGLL	0.919631	0.0206993	0.220311	2.95423
ENSG00000074527.7	NTN4	0.27477	0.673215	0.906246	0.17282
ENSG00000074582.8	BCS1L	0.466849	0.038096	0.301296	5.28065
ENSG00000074590.9	NUAK1	-0.444062	0.259222	0.674526	3.42513
ENSG00000074603.14	DPP8	-0.100563	0.619875	0.886414	5.99166
ENSG00000074621.9	SLC24A1	-0.400583	0.150045	0.552472	3.45212
ENSG00000074657.9	ZNF532	0.464054	0.315735	0.718609	4.03807
ENSG00000074660.11	SCARF1	0.838166	0.051833	0.34663	2.1351
ENSG00000074695.5	LMAN1	-0.241529	0.229216	0.646698	6.72061
ENSG00000074696.8	PTPLAD1	-0.0505487	0.791548	0.945425	7.94555
ENSG00000074706.9	IPCEF1	1.28484	0.0380206	0.300939	-0.290649
ENSG00000074755.10	ZZEF1	-0.102538	0.61065	0.883342	6.3599
ENSG00000074800.9	ENO1	0.119221	0.5983	0.878301	9.39629
ENSG00000074842.3	C19orf10	-0.376339	0.180919	0.591348	6.23494
ENSG00000074855.6	ANO8	-0.360927	0.121302	0.500762	5.81914
ENSG00000074935.9	TUBE1	0.147181	0.72792	0.926198	5.5869
ENSG00000074964.12	ARHGEF10L	0.821381	0.114997	0.489459	4.80731
ENSG00000074966.6	TXK	0.174849	0.820809	0.953481	-0.275811
ENSG00000075043.13	KCNQ2	0.573747	0.275131	0.688657	2.62763
ENSG00000075073.10	TACR2	-0.160818	0.766788	0.937135	0.779848
ENSG00000075089.5	ACTR6	-0.209119	0.4182	0.794419	5.40614
ENSG00000075131.5	TIPIN	-0.35616	0.321205	0.723726	4.52131
ENSG00000075142.9	SRI	0.3891	0.0923943	0.44799	5.72972
ENSG00000075151.15	EIF4G3	0.180383	0.424552	0.798856	7.34186
ENSG00000075188.4	NUP37	-0.183416	0.544907	0.856968	5.29372
ENSG00000075218.14	GTSE1	-0.430779	0.48332	0.827163	5.69816
ENSG00000075223.9	SEMA3C	0.371462	0.486864	0.82875	5.67205
ENSG00000075234.12	TTC38	0.0130789	0.951861	0.987735	5.24553
ENSG00000075239.9	ACAT1	-0.238799	0.349935	0.747022	6.24156
ENSG00000075240.12	GRAMD4	0.287937	0.201573	0.617812	4.85232
ENSG00000075275.12	CELSR1	1.18623	0.017113	0.200249	6.24703
ENSG00000075290.7	WNT8B	0.882494	0.0127106	0.17343	2.40556
ENSG00000075292.14	ZNF638	0.0504947	0.787232	0.944543	7.6508
ENSG00000075303.8	SLC25A40	-0.395457	0.166355	0.574617	5.97582
ENSG00000075336.7	TIMM21	0.027855	0.907064	0.977079	5.14081
ENSG00000075391.12	RASAL2	0.456584	0.0685124	0.396534	5.33277
ENSG00000075399.8	VPS9D1	-0.0259248	0.934587	0.984412	4.95662
ENSG00000075407.13	ZNF37A	0.0547393	0.832382	0.955933	6.50266
ENSG00000075413.13	MARK3	0.139019	0.469331	0.82147	6.69124
ENSG00000075415.8	SLC25A3	-0.039642	0.844251	0.95897	9.269
ENSG00000075420.8	FNDC3B	-0.136213	0.609959	0.88315	4.80067
ENSG00000075426.7	FOSL2	0.144025	0.654709	0.898616	4.12226
ENSG00000075461.5	CACNG4	1.2031	0.0880391	0.440681	0.544956
ENSG00000075539.9	FRYL	0.178491	0.383012	0.771124	6.44016
ENSG00000075568.12	TMEM131	-0.282182	0.158198	0.564927	6.65512
ENSG00000075618.13	FSCN1	0.698316	0.210289	0.628316	3.7121
ENSG00000075624.9	ACTB	0.163432	0.532057	0.849681	10.8328
ENSG00000075643.5	MOCOS	-1.02644	0.0243383	0.238977	4.93476
ENSG00000075651.11	PLD1	-0.0872757	0.886408	0.972036	-0.0415826
ENSG00000075673.7	ATP12A	0.240591	0.724668	0.925889	-0.352195
ENSG00000075702.12	WDR62	-0.504036	0.293264	0.702363	5.37132
ENSG00000075711.16	DLG1	0.0953516	0.610518	0.883342	7.00362
ENSG00000075785.8	RAB7A	-0.18339	0.338633	0.737324	8.1348
ENSG00000075790.6	BCAP29	-0.145061	0.559872	0.863692	6.32574
ENSG00000075826.12	SEC31B	0.333998	0.454801	0.813636	4.30223
ENSG00000075856.7	SART3	-0.100296	0.593098	0.876571	7.15334
ENSG00000075884.8	ARHGAP15	-0.204343	0.516193	0.843573	2.2342
ENSG00000075886.10	TUBA3D	-0.249467	0.571072	0.869014	1.50478
ENSG00000075891.17	PAX2	-0.841168	0.059587	0.372643	2.11335
ENSG00000075914.8	EXOSC7	0.212793	0.364431	0.757058	4.72573
ENSG00000075945.8	KIFAP3	-0.283398	0.195025	0.609919	6.12531
ENSG00000075975.11	MKRN2	0.0096841	0.961484	0.991589	4.70649
ENSG00000076003.4	MCM6	-0.267065	0.517385	0.843983	6.57882
ENSG00000076043.5	REXO2	0.22327	0.270749	0.685129	5.25555
ENSG00000076053.6	RBM7	-0.00715021	0.973662	0.99502	3.86473
ENSG00000076067.7	RBMS2	0.390536	0.166704	0.575138	3.74374
ENSG00000076108.7	BAZ2A	-0.0745004	0.68515	0.91271	8.98042
ENSG00000076201.10	PTPN23	-0.160366	0.409892	0.78888	6.74294
ENSG00000076242.10	MLH1	-0.503912	0.0260564	0.247347	6.37593
ENSG00000076248.6	UNG	-0.331273	0.226737	0.643648	7.52599
ENSG00000076258.5	FMO4	0.253976	0.460571	0.816188	1.86424
ENSG00000076321.6	KLHL20	0.0841867	0.644783	0.895926	4.73472
ENSG00000076344.11	RGS11	-0.364552	0.453703	0.812995	4.84616
ENSG00000076351.8	SLC46A1	-0.430864	0.0958366	0.45474	3.38312
ENSG00000076356.6	PLXNA2	1.94437	3.28065e-07	0.000187109	6.04002
ENSG00000076382.12	SPAG5	-0.352262	0.492648	0.832502	6.80331
ENSG00000076513.12	ANKRD13A	-0.179245	0.304654	0.710857	6.30925
ENSG00000076554.11	TPD52	-0.234593	0.252634	0.668843	7.41498
ENSG00000076555.11	ACACB	0.264797	0.338252	0.736867	4.6729
ENSG00000076604.10	TRAF4	0.104701	0.651003	0.897757	6.89367
ENSG00000076641.4	PAG1	0.578921	0.0728028	0.406287	5.29694
ENSG00000076650.2	GPATCH1	0.0207725	0.921094	0.98068	4.21934
ENSG00000076662.5	ICAM3	0.155761	0.646118	0.896136	4.14014
ENSG00000076685.14	NT5C2	0.120391	0.525941	0.847572	5.04942
ENSG00000076706.10	MCAM	0.35017	0.482133	0.827163	2.28801
ENSG00000076716.7	GPC4	0.145831	0.652478	0.89782	4.55168
ENSG00000076770.10	MBNL3	-0.917136	0.0659541	0.390212	4.15209
ENSG00000076826.5	CAMSAP3	0.0676482	0.763456	0.936216	6.49075
ENSG00000076864.15	RAP1GAP	2.87116	0.000901626	0.0382378	7.8365
ENSG00000076924.7	XAB2	-0.0643352	0.727353	0.926198	6.33474
ENSG00000076928.13	ARHGEF1	-0.0782471	0.710439	0.921495	5.42082
ENSG00000076944.10	STXBP2	0.0735518	0.767029	0.937167	5.54477
ENSG00000076984.13	MAP2K7	0.0555574	0.79562	0.946751	6.13166
ENSG00000077009.9	NMRK2	0.315433	0.606274	0.881283	-0.77998
ENSG00000077044.5	DGKD	-0.0959737	0.721059	0.924362	5.45112
ENSG00000077063.6	CTTNBP2	3.3313	9.02081e-05	0.0086992	1.65736
ENSG00000077080.5	ACTL6B	0.366452	0.192176	0.606134	4.22734
ENSG00000077092.14	RARB	-0.606004	0.07214	0.405042	3.44222
ENSG00000077097.9	TOP2B	0.186446	0.316962	0.719203	8.20982
ENSG00000077147.10	TM9SF3	-0.121565	0.558501	0.862701	8.33664
ENSG00000077150.13	NFKB2	0.11442	0.685701	0.912888	6.17315
ENSG00000077152.5	UBE2T	-0.445	0.362375	0.755552	6.55481
ENSG00000077157.16	PPP1R12B	-0.197945	0.415703	0.792616	6.41213
ENSG00000077232.12	DNAJC10	-0.327524	0.128909	0.51373	8.33627
ENSG00000077235.13	GTF3C1	-0.311415	0.327202	0.727995	7.88471
ENSG00000077238.9	IL4R	-0.0706381	0.907129	0.977079	0.683877
ENSG00000077254.10	USP33	-0.0115207	0.950577	0.987289	6.28104
ENSG00000077264.10	PAK3	1.19774	0.025799	0.245941	2.16485
ENSG00000077312.4	SNRPA	0.0775373	0.763137	0.936135	6.36545
ENSG00000077348.4	EXOSC5	0.00599185	0.979879	0.996181	4.42074
ENSG00000077380.11	DYNC1I2	0.209003	0.367879	0.758856	5.10339
ENSG00000077454.11	LRCH4	0.299507	0.306799	0.71271	6.58456
ENSG00000077458.8	FAM76B	-0.537348	0.0668698	0.392518	5.29483
ENSG00000077463.10	SIRT6	-0.0816059	0.738725	0.92861	5.04028
ENSG00000077514.4	POLD3	-0.492859	0.15366	0.556691	5.60221
ENSG00000077522.8	ACTN2	-1.20868	0.233863	0.651297	2.01595
ENSG00000077549.13	CAPZB	-0.188529	0.385034	0.772622	7.34133
ENSG00000077585.9	GPR137B	0.12998	0.58531	0.874935	3.79406
ENSG00000077616.6	NAALAD2	-0.116738	0.781564	0.942115	1.69742
ENSG00000077684.11	PHF17	-0.730763	0.00846984	0.142953	6.10689
ENSG00000077713.14	SLC25A43	-0.232463	0.441701	0.808694	4.20481
ENSG00000077721.11	UBE2A	-0.236539	0.283152	0.696351	5.86137
ENSG00000077782.15	FGFR1	-0.0185632	0.957772	0.990189	4.25781
ENSG00000077800.7	FKBP6	0.623665	0.332187	0.732461	-0.748874
ENSG00000077809.8	GTF2I	0.632405	0.0162148	0.196289	6.92416
ENSG00000077935.12	SMC1B	-1.23273	0.0193843	0.214021	3.84307
ENSG00000077942.13	FBLN1	1.01635	0.147533	0.548325	3.37072
ENSG00000078018.15	MAP2	0.17498	0.735356	0.928159	6.84358
ENSG00000078043.11	PIAS2	0.236365	0.230854	0.648665	5.40093
ENSG00000078053.12	AMPH	-3.0484	0.00166867	0.0543619	0.941307
ENSG00000078061.8	ARAF	-0.124507	0.643249	0.895809	6.11957
ENSG00000078070.7	MCCC1	0.346732	0.17566	0.58716	6.12348
ENSG00000078081.3	LAMP3	-1.76607	0.0750797	0.411855	3.74385
ENSG00000078114.14	NEBL	-1.00676	0.0136759	0.180721	5.34115
ENSG00000078124.7	ACER3	-0.874888	0.003377	0.0842645	6.03649
ENSG00000078140.9	UBE2K	-0.0964177	0.646186	0.896136	7.73983
ENSG00000078142.7	PIK3C3	-0.0460493	0.851107	0.959773	5.41748
ENSG00000078177.9	N4BP2	-0.437275	0.191581	0.605247	5.66068
ENSG00000078237.4	C12orf5	0.792216	0.0322119	0.275027	2.62034
ENSG00000078246.11	TULP3	-0.0944936	0.707972	0.921172	5.88964
ENSG00000078269.9	SYNJ2	-0.808197	0.00302776	0.0785957	4.45102
ENSG00000078304.15	PPP2R5C	0.014603	0.942463	0.985184	6.78733
ENSG00000078319.7	PMS2P1	0.67101	0.0194247	0.214118	2.29568
ENSG00000078328.15	RBFOX1	0.761219	0.240378	0.659063	-0.898762
ENSG00000078369.13	GNB1	-0.229254	0.360339	0.754451	8.8031
ENSG00000078399.11	HOXA9	-0.274984	0.411112	0.789781	2.46724
ENSG00000078401.6	EDN1	0.921669	0.0233617	0.234227	3.20139
ENSG00000078403.12	MLLT10	-0.00334003	0.989893	0.997746	5.89188
ENSG00000078487.13	ZCWPW1	0.61444	0.144253	0.542292	2.12469
ENSG00000078596.6	ITM2A	1.57386	0.0299018	0.264273	-0.0760399
ENSG00000078618.15	NRD1	0.00471429	0.97881	0.995923	7.40265
ENSG00000078668.9	VDAC3	0.0161008	0.947885	0.986572	6.85626
ENSG00000078674.13	PCM1	-0.0943676	0.614186	0.88382	8.05263
ENSG00000078687.12	TNRC6C	0.276377	0.240437	0.659063	4.73405
ENSG00000078699.17	CBFA2T2	0.182279	0.540829	0.85486	5.7693
ENSG00000078725.8	BRINP1	0.70611	0.404931	0.786147	1.30031
ENSG00000078747.8	ITCH	-0.125856	0.463686	0.817822	6.52417
ENSG00000078795.12	PKD2L2	-0.314601	0.581858	0.873478	-0.486263
ENSG00000078804.8	TP53INP2	-0.869087	0.00316404	0.0807681	5.92554
ENSG00000078808.12	SDF4	0.13839	0.512984	0.841904	7.3108
ENSG00000078814.11	MYH7B	0.548589	0.126183	0.509619	1.85117
ENSG00000078900.10	TP73	-0.48692	0.361187	0.755039	3.01853
ENSG00000078902.11	TOLLIP	0.39466	0.148396	0.549525	5.43689
ENSG00000078967.8	UBE2D4	0.483363	0.0417441	0.313731	5.19151
ENSG00000079101.12	CLUL1	0.127224	0.749283	0.93183	1.43397
ENSG00000079112.5	CDH17	1.40111	0.017499	0.203327	3.6085
ENSG00000079134.7	THOC1	-0.0976181	0.65992	0.901603	6.02107
ENSG00000079150.13	FKBP7	-0.215519	0.555305	0.860837	2.05381
ENSG00000079156.12	OSBPL6	-1.80981	1.71995e-07	0.000114446	3.72055
ENSG00000079215.9	SLC1A3	0.971195	0.0634255	0.382882	3.27457
ENSG00000079246.11	XRCC5	-0.155288	0.541433	0.85534	8.84363
ENSG00000079257.3	LXN	1.39527	0.0474285	0.333604	3.43868
ENSG00000079277.15	MKNK1	0.466144	0.0592939	0.371625	4.35885
ENSG00000079308.12	TNS1	1.37754	0.0165714	0.197609	2.58593
ENSG00000079313.7	REXO1	-0.0214189	0.905938	0.977079	5.75753
ENSG00000079332.10	SAR1A	-0.00664764	0.96976	0.994119	6.9315
ENSG00000079335.13	CDC14A	-0.470512	0.195852	0.611474	4.12537
ENSG00000079337.11	RAPGEF3	1.59152	0.000391562	0.0225572	1.70718
ENSG00000079385.17	CEACAM1	0.932886	0.0344053	0.283918	1.22694
ENSG00000079387.9	SENP1	-0.0889848	0.738964	0.92861	6.29924
ENSG00000079432.3	CIC	-0.236453	0.255435	0.672691	6.75162
ENSG00000079435.5	LIPE	-0.468168	0.116769	0.492336	2.98685
ENSG00000079459.8	FDFT1	-0.611261	0.164424	0.572715	9.07368
ENSG00000079462.3	PAFAH1B3	-0.0506376	0.874959	0.968231	6.09452
ENSG00000079482.11	OPHN1	-0.0390987	0.895153	0.975208	3.82059
ENSG00000079616.8	KIF22	-0.261527	0.436611	0.804339	6.7402
ENSG00000079689.9	SCGN	1.30876	0.0423178	0.315794	1.62789
ENSG00000079691.15	LRRC16A	0.179762	0.346986	0.74487	5.2418
ENSG00000079739.11	PGM1	0.118871	0.594209	0.87689	4.3937
ENSG00000079785.10	DDX1	-0.0509479	0.794809	0.946554	7.40536
ENSG00000079805.12	DNM2	-0.0917918	0.604523	0.881201	7.71915
ENSG00000079819.12	EPB41L2	0.14953	0.753111	0.93246	4.06132
ENSG00000079841.14	RIMS1	-0.376474	0.363067	0.7559	3.83346
ENSG00000079931.10	MOXD1	-1.35761	0.00199302	0.0604629	2.04419
ENSG00000079950.9	STX7	-0.266539	0.357042	0.751827	5.10834
ENSG00000079974.13	RABL2B	0.149566	0.570696	0.868967	3.24456
ENSG00000079999.9	KEAP1	-0.0220856	0.90631	0.977079	6.28463
ENSG00000080031.5	PTPRH	-0.216422	0.73277	0.927899	1.28811
ENSG00000080166.11	DCT	1.81674	0.0298499	0.264273	1.00955
ENSG00000080189.10	SLC35C2	-0.0696181	0.716062	0.923238	5.88278
ENSG00000080200.5	CRYBG3	-0.282242	0.367538	0.758688	2.83755
ENSG00000080224.13	EPHA6	-2.18751	1.91037e-06	0.000669032	4.176
ENSG00000080298.11	RFX3	0.132581	0.615922	0.884662	5.22916
ENSG00000080345.13	RIF1	-0.237036	0.291421	0.701455	6.58947
ENSG00000080371.4	RAB21	-0.217876	0.280236	0.693705	7.19959
ENSG00000080493.9	SLC4A4	0.337264	0.519919	0.845509	2.53158
ENSG00000080503.15	SMARCA2	-0.783593	4.91327e-05	0.00580347	7.19297
ENSG00000080546.9	SESN1	0.524773	0.20896	0.626314	4.16583
ENSG00000080561.9	MID2	-0.555042	0.0367924	0.294783	3.15863
ENSG00000080603.12	SRCAP	0.0554126	0.759555	0.934573	7.79593
ENSG00000080608.9	KIAA0020	0.0041009	0.984036	0.99682	6.21413
ENSG00000080618.9	CPB2	-0.131915	0.833481	0.956706	-0.831644
ENSG00000080644.11	CHRNA3	-0.959167	0.0274745	0.254913	2.76988
ENSG00000080709.10	KCNN2	-0.31321	0.401324	0.783801	3.82963
ENSG00000080802.14	CNOT4	0.432385	0.0705322	0.401243	5.47086
ENSG00000080815.14	PSEN1	-0.0636612	0.726424	0.926135	6.17971
ENSG00000080819.2	CPOX	-0.328859	0.137408	0.530241	4.89683
ENSG00000080822.12	CLDND1	-0.503776	0.0163229	0.196542	6.0793
ENSG00000080823.17	MOK	-0.362929	0.223064	0.639558	4.2262
ENSG00000080824.14	HSP90AA1	0.242924	0.441356	0.808398	10.3956
ENSG00000080839.7	RBL1	-0.513481	0.171856	0.582543	4.7364
ENSG00000080845.13	DLGAP4	0.415517	0.106518	0.475785	5.85362
ENSG00000080854.10	IGSF9B	-0.577074	0.471888	0.823195	0.115579
ENSG00000080947.10	CROCCP3	0.0382434	0.908593	0.977079	2.68025
ENSG00000080986.8	NDC80	-0.516932	0.366932	0.75855	5.497
ENSG00000081014.6	AP4E1	-0.0723721	0.759784	0.934608	5.12698
ENSG00000081019.9	RSBN1	0.312588	0.175913	0.58718	4.87202
ENSG00000081026.14	MAGI3	-0.255819	0.322146	0.724491	5.36146
ENSG00000081051.3	AFP	2.30493	0.000760184	0.0343321	-0.849309
ENSG00000081052.10	COL4A4	-0.475242	0.219607	0.63783	1.22453
ENSG00000081059.15	TCF7	-0.778228	0.0358043	0.290185	2.45987
ENSG00000081087.10	OSTM1	-0.0662129	0.802098	0.948557	4.78636
ENSG00000081138.9	CDH7	-0.485224	0.310625	0.715686	3.99365
ENSG00000081148.11	IMPG2	-0.150757	0.792573	0.94563	0.611749
ENSG00000081154.7	PCNP	0.0985157	0.580444	0.872958	7.06497
ENSG00000081177.14	EXD2	-0.0645896	0.748761	0.931785	5.27915
ENSG00000081181.3	ARG2	-0.64545	0.141794	0.536791	4.52415
ENSG00000081189.9	MEF2C	1.1081	0.0114259	0.164801	2.62781
ENSG00000081277.7	PKP1	1.15317	0.0225739	0.231681	2.76538
ENSG00000081307.8	UBA5	0.00460576	0.982499	0.996625	6.10808
ENSG00000081320.6	STK17B	-0.656799	0.0607188	0.375952	3.73542
ENSG00000081377.12	CDC14B	0.585433	0.0609028	0.376274	3.58613
ENSG00000081386.8	ZNF510	0.227255	0.282194	0.69535	4.93806
ENSG00000081479.8	LRP2	-0.543199	0.333316	0.732605	2.04112
ENSG00000081665.9	ZNF506	0.485526	0.0866641	0.438638	4.86702
ENSG00000081692.8	JMJD4	0.0958316	0.728431	0.926198	3.4564
ENSG00000081721.7	DUSP12	-0.125456	0.615665	0.884547	5.08842
ENSG00000081760.12	AACS	-0.118361	0.546502	0.857239	6.82258
ENSG00000081791.4	KIAA0141	0.207365	0.347254	0.745065	6.36087
ENSG00000081803.11	CADPS2	0.663871	0.202688	0.619041	5.72483
ENSG00000081818.1	PCDHB4	0.515656	0.317108	0.719332	0.851068
ENSG00000081842.13	PCDHA6	1.06164	0.00335551	0.0839383	1.57982
ENSG00000081853.13	PCDHGA2	0.188474	0.66657	0.904207	0.983452
ENSG00000081870.7	HSPB11	-0.860935	0.00109159	0.0420941	4.3605
ENSG00000081913.9	PHLPP1	-0.552432	0.0139973	0.183584	4.89454
ENSG00000081923.6	ATP8B1	-0.449002	0.0827352	0.428865	5.90904
ENSG00000081985.6	IL12RB2	0.557513	0.295397	0.704421	-0.0881764
ENSG00000082014.12	SMARCD3	1.08887	0.0288357	0.260251	4.5156
ENSG00000082068.4	WDR70	-0.0517849	0.831824	0.955901	5.42382
ENSG00000082146.8	STRADB	0.181322	0.550625	0.858283	3.53938
ENSG00000082153.13	BZW1	-0.235995	0.429458	0.800933	6.48937
ENSG00000082175.10	PGR	-1.91043	0.000696515	0.0327921	-0.354854
ENSG00000082196.16	C1QTNF3	0.197492	0.646135	0.896136	1.15593
ENSG00000082212.7	ME2	0.414658	0.11443	0.488408	6.03065
ENSG00000082213.13	C5orf22	-0.0992163	0.625131	0.888711	6.03289
ENSG00000082258.8	CCNT2	0.301938	0.104711	0.471946	5.26701
ENSG00000082269.12	FAM135A	0.192759	0.500779	0.835134	5.23432
ENSG00000082293.8	COL19A1	0.667538	0.202648	0.619015	-0.199669
ENSG00000082397.11	EPB41L3	-1.50855	0.0333128	0.279374	-0.93601
ENSG00000082438.11	COBLL1	-0.04626	0.827375	0.955293	6.26273
ENSG00000082458.7	DLG3	-0.416637	0.211997	0.630094	6.76397
ENSG00000082482.9	KCNK2	0.316822	0.769482	0.937987	-0.705062
ENSG00000082497.7	SERTAD4	-1.61208	0.0143556	0.185182	-0.57979
ENSG00000082512.10	TRAF5	0.29083	0.476291	0.82475	3.63273
ENSG00000082515.12	MRPL22	0.10888	0.64992	0.897394	4.39301
ENSG00000082516.8	GEMIN5	0.258012	0.276904	0.690725	5.66742
ENSG00000082641.11	NFE2L1	-0.975115	0.00111407	0.0425221	7.90766
ENSG00000082684.10	SEMA5B	-0.366636	0.593203	0.876571	-0.910156
ENSG00000082701.10	GSK3B	-0.0937733	0.602721	0.88014	7.53966
ENSG00000082781.7	ITGB5	-0.407001	0.177046	0.587896	6.91036
ENSG00000082805.15	ERC1	-0.130624	0.527461	0.848101	5.87566
ENSG00000082898.12	XPO1	0.00110869	0.994968	0.998369	8.36357
ENSG00000082996.15	RNF13	-0.265707	0.221545	0.638502	5.38113
ENSG00000083093.5	PALB2	0.0266685	0.901314	0.976148	4.11548
ENSG00000083097.10	DOPEY1	-0.11667	0.751272	0.932236	5.63224
ENSG00000083099.6	LYRM2	-0.172569	0.404068	0.785395	5.69645
ENSG00000083123.10	BCKDHB	-0.308046	0.213993	0.631567	5.1895
ENSG00000083168.5	KAT6A	-0.370418	0.0508281	0.34371	7.41455
ENSG00000083223.13	ZCCHC6	-0.289011	0.270959	0.685276	5.66557
ENSG00000083290.15	ULK2	-0.621617	0.0163738	0.196663	5.28601
ENSG00000083307.6	GRHL2	0.256501	0.368835	0.759022	7.32596
ENSG00000083312.13	TNPO1	0.218679	0.251706	0.667608	8.01612
ENSG00000083444.12	PLOD1	0.145889	0.574269	0.870849	5.63444
ENSG00000083454.17	P2RX5	0.541873	0.0191817	0.212962	3.63966
ENSG00000083457.7	ITGAE	0.296334	0.369162	0.759022	3.95648
ENSG00000083520.10	DIS3	0.199524	0.311333	0.716306	6.54852
ENSG00000083535.11	PIBF1	-0.0459752	0.847744	0.959337	4.80363
ENSG00000083544.9	TDRD3	-0.153701	0.43516	0.80346	5.03929
ENSG00000083635.7	NUFIP1	-0.14985	0.606517	0.881283	3.78419
ENSG00000083642.14	PDS5B	-0.548084	0.064017	0.384218	4.51673
ENSG00000083720.8	OXCT1	0.208881	0.492027	0.83229	7.33094
ENSG00000083750.8	RRAGB	-0.244371	0.369645	0.759297	3.68307
ENSG00000083782.3	EPYC	2.34893	0.000928313	0.0388536	-0.612554
ENSG00000083799.13	CYLD	-1.10776	0.000477579	0.025906	4.94871
ENSG00000083807.5	SLC27A5	0.110618	0.658641	0.90053	3.89419
ENSG00000083812.7	ZNF324	-0.0302593	0.90496	0.977075	4.60417
ENSG00000083814.8	ZNF671	0.302872	0.53174	0.849681	1.23878
ENSG00000083817.8	ZNF416	-0.363223	0.156196	0.56019	2.56673
ENSG00000083828.11	ZNF586	-0.0731557	0.736597	0.92842	4.22769
ENSG00000083838.11	ZNF446	0.0429979	0.854953	0.960739	4.37418
ENSG00000083844.6	ZNF264	-0.159591	0.448871	0.811342	4.16437
ENSG00000083845.4	RPS5	0.202304	0.489467	0.83028	9.16415
ENSG00000083857.9	FAT1	0.276093	0.299638	0.706683	7.28777
ENSG00000083896.8	YTHDC1	0.0138416	0.939715	0.984869	6.73406
ENSG00000083937.4	CHMP2B	-0.0997764	0.61119	0.883342	6.71137
ENSG00000084070.7	SMAP2	-0.0375788	0.881231	0.970328	5.90256
ENSG00000084072.12	PPIE	0.130017	0.596043	0.877578	4.9906
ENSG00000084073.4	ZMPSTE24	0.00723046	0.976593	0.995713	6.62134
ENSG00000084090.9	STARD7	0.0531221	0.801892	0.948541	7.57667
ENSG00000084092.6	NOA1	0.133784	0.528321	0.84842	6.10773
ENSG00000084093.11	REST	0.0213858	0.925084	0.982109	6.75845
ENSG00000084112.10	SSH1	-0.0578691	0.800003	0.947851	6.18321
ENSG00000084234.12	APLP2	-0.422847	0.0750566	0.411855	8.93546
ENSG00000084444.9	KIAA1467	-0.39083	0.284707	0.69654	6.99875
ENSG00000084453.12	SLCO1A2	0.16288	0.757873	0.933896	1.65564
ENSG00000084463.3	WBP11	-0.144209	0.534217	0.850101	7.24943
ENSG00000084623.7	EIF3I	0.209909	0.343723	0.741637	7.60855
ENSG00000084628.5	NKAIN1	-0.0172975	0.96471	0.992606	3.41671
ENSG00000084636.13	COL16A1	-0.890406	0.253856	0.670122	2.83805
ENSG00000084652.11	TXLNA	-0.100741	0.568845	0.867887	7.04408
ENSG00000084674.9	APOB	-1.70271	0.0134337	0.179031	-0.50122
ENSG00000084676.11	NCOA1	-0.207556	0.38232	0.771096	5.58245
ENSG00000084693.11	AGBL5	-0.0984125	0.63566	0.893445	6.17677
ENSG00000084710.9	EFR3B	0.226002	0.613583	0.883801	1.38306
ENSG00000084731.9	KIF3C	-0.314014	0.295013	0.703843	3.91618
ENSG00000084733.6	RAB10	-0.0692341	0.710397	0.921495	7.79692
ENSG00000084754.6	HADHA	-0.04166	0.809371	0.949874	8.26812
ENSG00000084764.6	MAPRE3	0.324523	0.274762	0.688529	4.69115
ENSG00000084774.9	CAD	0.119792	0.544285	0.85666	7.33642
ENSG00000085063.10	CD59	0.348897	0.149855	0.552224	5.57633
ENSG00000085117.7	CD82	0.244582	0.50227	0.836083	2.13273
ENSG00000085185.11	BCORL1	-0.0653575	0.791116	0.945425	6.40506
ENSG00000085224.16	ATRX	0.256327	0.262887	0.677304	7.80328
ENSG00000085231.9	TAF9	0.0952757	0.626102	0.888992	6.57086
ENSG00000085274.11	MYNN	0.233352	0.412684	0.791575	6.59967
ENSG00000085276.13	MECOM	0.734817	0.0164615	0.197026	4.19976
ENSG00000085365.13	SCAMP1	-0.0176216	0.922082	0.98068	7.03098
ENSG00000085377.9	PREP	-0.0123636	0.950987	0.987289	5.27091
ENSG00000085382.7	HACE1	-0.334316	0.158952	0.566404	5.03858
ENSG00000085415.11	SEH1L	0.0424033	0.85284	0.959883	6.28873
ENSG00000085433.11	WDR47	-0.266055	0.245675	0.662374	4.41736
ENSG00000085449.10	WDFY1	-0.031899	0.875558	0.968465	5.9694
ENSG00000085465.11	OVGP1	0.262311	0.5797	0.872616	2.31744
ENSG00000085491.11	SLC25A24	-0.588152	0.00916837	0.147596	4.52103
ENSG00000085511.15	MAP3K4	-0.267917	0.251256	0.667061	5.22374
ENSG00000085514.11	PILRA	0.143208	0.82682	0.955135	1.15552
ENSG00000085552.12	IGSF9	0.641457	0.110517	0.482992	5.67697
ENSG00000085563.10	ABCB1	0.0366621	0.950374	0.987289	-0.0771281
ENSG00000085644.9	ZNF213	-0.102389	0.66087	0.901937	5.01354
ENSG00000085719.7	CPNE3	-0.249269	0.152306	0.555585	7.31004
ENSG00000085721.8	RRN3	0.086342	0.662437	0.902703	6.1474
ENSG00000085733.11	CTTN	0.0145978	0.937628	0.984721	8.24926
ENSG00000085741.8	WNT11	-0.0615585	0.92129	0.98068	-0.471852
ENSG00000085760.10	MTIF2	0.163007	0.474376	0.824348	5.32758
ENSG00000085788.9	DDHD2	-0.43295	0.0206179	0.220054	6.13424
ENSG00000085831.11	TTC39A	-0.216854	0.483107	0.827163	5.90341
ENSG00000085832.12	EPS15	-0.0814601	0.670755	0.90538	6.72607
ENSG00000085840.8	ORC1	-0.65121	0.191963	0.605749	4.69526
ENSG00000085871.4	MGST2	0.579717	0.0797881	0.421855	5.12962
ENSG00000085872.10	CHERP	0.0231472	0.899993	0.976148	6.43861
ENSG00000085978.17	ATG16L1	-0.0227058	0.924344	0.981789	4.98163
ENSG00000085982.9	USP40	-0.22725	0.27418	0.688517	6.20973
ENSG00000085998.9	POMGNT1	-0.0441661	0.825731	0.954942	7.54927
ENSG00000085999.7	RAD54L	-0.302764	0.48605	0.827994	4.38189
ENSG00000086015.16	MAST2	0.0625413	0.82884	0.955555	7.50343
ENSG00000086061.11	DNAJA1	0.161837	0.500863	0.835134	8.29095
ENSG00000086062.8	B4GALT1	-0.4819	0.0895405	0.442537	6.78936
ENSG00000086065.9	CHMP5	-0.0924769	0.61948	0.886414	6.4252
ENSG00000086102.14	NFX1	-0.0239461	0.900913	0.976148	7.2792
ENSG00000086159.8	AQP6	1.24524	0.0710208	0.402304	-0.938369
ENSG00000086189.5	DIMT1	0.0591892	0.788835	0.945023	5.83949
ENSG00000086200.12	IPO11	-0.14144	0.613348	0.883801	4.70659
ENSG00000086205.12	FOLH1	-0.0636084	0.883685	0.970897	8.119
ENSG00000086232.8	EIF2AK1	0.12335	0.613643	0.883801	8.05326
ENSG00000086289.7	EPDR1	-1.02338	0.0128593	0.17415	5.26397
ENSG00000086300.11	SNX10	-0.88289	0.0705306	0.401243	3.65076
ENSG00000086475.10	SEPHS1	-0.0352287	0.873931	0.967845	6.11892
ENSG00000086504.11	MRPL28	0.196495	0.414818	0.792478	5.97219
ENSG00000086506.2	HBQ1	0.312891	0.442706	0.809128	2.6284
ENSG00000086544.2	ITPKC	0.979409	0.00758403	0.134332	5.39997
ENSG00000086548.8	CEACAM6	-0.3002	0.765091	0.936445	2.20092
ENSG00000086570.8	FAT2	0.623228	0.106235	0.475191	0.883276
ENSG00000086589.7	RBM22	-0.288505	0.135704	0.526617	6.1718
ENSG00000086598.6	TMED2	-0.171752	0.449163	0.811342	9.01687
ENSG00000086619.9	ERO1LB	-0.401799	0.346023	0.743681	3.54086
ENSG00000086666.14	ZFAND6	0.311613	0.0899043	0.443397	5.51925
ENSG00000086712.8	TXLNG	0.770369	0.00961318	0.150736	5.57061
ENSG00000086717.14	PPEF1	0.0717232	0.90619	0.977079	-0.564773
ENSG00000086730.12	LAT2	0.540768	0.367144	0.75855	4.03495
ENSG00000086758.11	HUWE1	-0.0602606	0.74043	0.92881	8.77557
ENSG00000086827.4	ZW10	-0.326334	0.176517	0.587573	5.32233
ENSG00000086848.10	ALG9	-0.217101	0.390435	0.776612	4.09981
ENSG00000086967.9	MYBPC2	0.00571825	0.991967	0.997746	-0.515194
ENSG00000087008.11	ACOX3	0.689945	0.00861727	0.143588	3.01967
ENSG00000087053.14	MTMR2	0.213284	0.339259	0.737802	5.96135
ENSG00000087074.7	PPP1R15A	-0.802311	0.14256	0.538771	6.80235
ENSG00000087076.4	HSD17B14	0.772673	0.108301	0.479687	0.98361
ENSG00000087077.7	TRIP6	1.00353	0.0204026	0.218613	4.08759
ENSG00000087085.9	ACHE	-0.370933	0.527402	0.848075	3.9514
ENSG00000087086.9	FTL	0.266822	0.24519	0.662105	8.17801
ENSG00000087087.14	SRRT	-0.020247	0.926239	0.982149	7.83701
ENSG00000087088.15	BAX	0.524025	0.0687332	0.397236	6.13575
ENSG00000087095.8	NLK	-0.0736173	0.711753	0.921766	5.02206
ENSG00000087111.16	PIGS	-0.230093	0.234981	0.652936	6.97171
ENSG00000087152.11	ATXN7L3	0.0642719	0.722465	0.924774	6.30405
ENSG00000087157.14	PGS1	0.339035	0.200707	0.61686	4.12176
ENSG00000087191.8	PSMC5	-0.143642	0.543724	0.856379	6.96129
ENSG00000087206.12	UIMC1	0.122322	0.579578	0.872616	5.26609
ENSG00000087253.7	LPCAT2	0.378793	0.579643	0.872616	0.953077
ENSG00000087258.9	GNAO1	0.0823629	0.881325	0.970328	1.03344
ENSG00000087263.12	OGFOD1	-0.0373512	0.834836	0.956768	5.93655
ENSG00000087266.11	SH3BP2	0.0121225	0.955791	0.989321	7.25752
ENSG00000087269.11	NOP14	0.00290105	0.986528	0.99722	6.83145
ENSG00000087274.12	ADD1	-0.0282296	0.88195	0.970509	7.88222
ENSG00000087299.7	L2HGDH	-0.28529	0.260778	0.675378	4.49915
ENSG00000087301.4	TXNDC16	-0.83144	0.00345412	0.0852598	6.18977
ENSG00000087302.4	C14orf166	-0.0727605	0.719231	0.924132	6.33994
ENSG00000087303.12	NID2	-0.49263	0.251729	0.667608	2.10943
ENSG00000087338.4	GMCL1	-0.204193	0.352275	0.748117	5.5145
ENSG00000087365.10	SF3B2	-0.125903	0.513348	0.842165	8.31437
ENSG00000087448.5	KLHL42	-0.158952	0.410122	0.789026	6.83746
ENSG00000087460.19	GNAS	0.110883	0.553446	0.860025	9.28379
ENSG00000087470.13	DNM1L	0.0105256	0.950553	0.987289	7.60046
ENSG00000087494.11	PTHLH	-1.44076	0.00699329	0.128552	1.2341
ENSG00000087502.13	ERGIC2	-0.125565	0.529789	0.848534	6.50004
ENSG00000087510.5	TFAP2C	-0.0661051	0.913827	0.978606	-0.540542
ENSG00000087586.13	AURKA	-0.483577	0.369736	0.759407	5.14079
ENSG00000087842.6	PIR	0.0639198	0.866498	0.964956	4.36792
ENSG00000087884.10	AAMDC	-0.466329	0.263982	0.678477	0.437306
ENSG00000087903.8	RFX2	-0.352301	0.305967	0.712364	2.52698
ENSG00000087995.11	METTL2A	0.0750487	0.70945	0.921495	4.49151
ENSG00000088002.7	SULT2B1	0.0294872	0.956447	0.989613	0.311752
ENSG00000088035.11	ALG6	-0.124933	0.663187	0.902852	4.40303
ENSG00000088038.13	CNOT3	-0.116975	0.526266	0.847622	6.6602
ENSG00000088179.4	PTPN4	0.12629	0.666051	0.904082	4.10595
ENSG00000088205.8	DDX18	0.0798195	0.671259	0.905506	6.06885
ENSG00000088247.11	KHSRP	-0.125296	0.559013	0.863034	8.67808
ENSG00000088256.4	GNA11	-0.260194	0.153658	0.556691	6.61242
ENSG00000088280.14	ASAP3	-0.0627124	0.814254	0.951601	4.38885
ENSG00000088298.8	EDEM2	-0.0538375	0.837109	0.957031	4.87416
ENSG00000088305.14	DNMT3B	0.0924298	0.740461	0.92881	4.01538
ENSG00000088325.11	TPX2	-0.589282	0.264292	0.678527	7.38426
ENSG00000088340.11	FER1L4	0.0852466	0.89169	0.973752	1.96958
ENSG00000088356.4	PDRG1	0.343708	0.196367	0.612004	4.76851
ENSG00000088367.16	EPB41L1	-0.529685	0.0758176	0.413969	5.55686
ENSG00000088386.11	SLC15A1	-1.19602	0.0435171	0.319723	-0.693112
ENSG00000088387.13	DOCK9	-0.465644	0.0308698	0.269739	5.44504
ENSG00000088448.10	ANKRD10	0.161236	0.575066	0.87121	5.34828
ENSG00000088451.6	TGDS	-0.117292	0.599409	0.878301	4.35674
ENSG00000088538.12	DOCK3	0.110649	0.745208	0.930484	6.25886
ENSG00000088543.10	C3orf18	-0.060063	0.876546	0.969007	1.56896
ENSG00000088682.9	COQ9	0.267885	0.183811	0.593726	6.04753
ENSG00000088727.8	KIF9	0.511767	0.0735788	0.408297	3.33899
ENSG00000088756.8	ARHGAP28	0.102483	0.881125	0.970312	-0.164983
ENSG00000088766.7	CRLS1	0.0995442	0.620753	0.886753	5.96095
ENSG00000088808.12	PPP1R13B	0.291871	0.133443	0.522667	5.8484
ENSG00000088812.13	ATRN	0.02617	0.930964	0.983744	6.43594
ENSG00000088826.13	SMOX	-0.545779	0.18426	0.59431	2.15086
ENSG00000088832.10	FKBP1A	0.0417952	0.828183	0.955534	6.63557
ENSG00000088833.13	NSFL1C	-0.203329	0.382286	0.771096	6.31501
ENSG00000088836.8	SLC4A11	0.467117	0.264482	0.678613	3.91904
ENSG00000088854.11	C20orf194	0.360949	0.454873	0.813636	2.30327
ENSG00000088876.7	ZNF343	-0.027114	0.898744	0.975941	4.0724
ENSG00000088881.16	EBF4	-0.306411	0.578133	0.872057	2.23706
ENSG00000088888.13	MAVS	-0.129621	0.630226	0.889907	5.90255
ENSG00000088899.10	LZTS3	0.553628	0.0852625	0.435333	2.79026
ENSG00000088930.6	XRN2	0.037228	0.849193	0.959535	7.46743
ENSG00000088970.11	PLK1S1	-0.358785	0.259875	0.675072	3.08897
ENSG00000088986.6	DYNLL1	0.219553	0.524885	0.847418	7.47549
ENSG00000088992.13	TESC	0.751431	0.189436	0.60292	0.530376
ENSG00000089006.12	SNX5	0.040764	0.842826	0.958794	6.36112
ENSG00000089009.11	RPL6	0.172924	0.494938	0.832795	7.68291
ENSG00000089022.9	MAPKAPK5	-0.110691	0.521094	0.846428	6.21714
ENSG00000089041.12	P2RX7	-0.134553	0.750304	0.931904	2.11346
ENSG00000089048.10	ESF1	0.208614	0.283291	0.696381	5.88437
ENSG00000089050.10	RBBP9	-0.27682	0.287508	0.698197	5.7287
ENSG00000089053.8	ANAPC5	0.0693811	0.706579	0.920614	8.18045
ENSG00000089057.10	SLC23A2	-0.282661	0.459543	0.816188	5.2977
ENSG00000089060.7	SLC8B1	0.170027	0.521928	0.846847	2.91632
ENSG00000089063.10	TMEM230	-0.0631646	0.756489	0.933651	5.80021
ENSG00000089091.12	DZANK1	0.853372	0.039273	0.305519	2.66717
ENSG00000089094.12	KDM2B	-0.231401	0.24329	0.659708	5.78365
ENSG00000089101.13	C20orf26	0.0631026	0.925849	0.982149	-0.582067
ENSG00000089116.3	LHX5	-1.46891	0.0203309	0.218549	0.186
ENSG00000089123.11	TASP1	0.133422	0.587855	0.874968	3.76852
ENSG00000089154.6	GCN1L1	0.057539	0.767403	0.937249	8.53321
ENSG00000089157.11	RPLP0	-0.0337107	0.902555	0.976279	10.0701
ENSG00000089159.11	PXN	0.0160911	0.940573	0.984869	6.02087
ENSG00000089163.4	SIRT4	0.796595	0.0515075	0.345787	0.544765
ENSG00000089177.13	KIF16B	0.301062	0.200402	0.616589	5.68594
ENSG00000089195.10	TRMT6	-0.0279957	0.894014	0.974995	5.85774
ENSG00000089199.5	CHGB	0.955562	0.00524253	0.110508	6.07134
ENSG00000089220.4	PEBP1	-0.130382	0.485185	0.827994	8.84107
ENSG00000089234.11	BRAP	0.128618	0.470008	0.821742	5.76371
ENSG00000089248.6	ERP29	-0.00539527	0.975078	0.995486	7.65767
ENSG00000089280.14	FUS	-0.119916	0.64033	0.895493	8.25136
ENSG00000089289.11	IGBP1	0.143244	0.645117	0.895973	5.29073
ENSG00000089335.16	ZNF302	0.118853	0.713488	0.922163	4.72271
ENSG00000089351.10	GRAMD1A	0.814489	0.0871608	0.439814	4.2423
ENSG00000089356.12	FXYD3	-0.212021	0.579691	0.872616	6.53808
ENSG00000089486.12	CDIP1	0.45748	0.04153	0.313312	4.76912
ENSG00000089505.13	CMTM1	-0.261606	0.341694	0.739864	2.07512
ENSG00000089558.4	KCNH4	0.664033	0.091687	0.446457	1.83979
ENSG00000089597.12	GANAB	-0.112521	0.58665	0.874968	9.03871
ENSG00000089639.6	GMIP	0.723396	0.0136008	0.180398	4.33616
ENSG00000089682.12	RBM41	0.123752	0.556071	0.861239	5.23657
ENSG00000089685.10	BIRC5	-0.338181	0.577955	0.872057	5.29401
ENSG00000089692.4	LAG3	-0.803841	0.0513389	0.345641	1.46021
ENSG00000089693.6	MLF2	0.0594454	0.75169	0.932282	8.88516
ENSG00000089723.5	OTUB2	0.569918	0.14208	0.537567	2.90484
ENSG00000089737.11	DDX24	-0.024422	0.916431	0.979288	7.78336
ENSG00000089775.7	ZBTB25	0.181686	0.519382	0.845231	4.74707
ENSG00000089818.12	NECAP1	-0.0551477	0.79074	0.945425	6.47784
ENSG00000089820.11	ARHGAP4	0.803469	0.0646476	0.385798	1.36029
ENSG00000089847.8	ANKRD24	0.174909	0.568895	0.867887	5.06568
ENSG00000089876.7	DHX32	-0.593708	0.0700921	0.400223	5.20174
ENSG00000089902.8	RCOR1	-0.0503486	0.796219	0.946751	5.9388
ENSG00000089916.13	GPATCH2L	-0.0446935	0.843397	0.958794	6.40649
ENSG00000090006.13	LTBP4	-0.5741	0.0255246	0.244565	6.48426
ENSG00000090013.5	BLVRB	-0.691209	0.0639787	0.384191	5.63303
ENSG00000090020.6	SLC9A1	0.0802198	0.799082	0.947392	7.46158
ENSG00000090054.9	SPTLC1	0.0524121	0.780692	0.941959	5.53183
ENSG00000090060.13	PAPOLA	0.0634864	0.699293	0.918132	8.18047
ENSG00000090061.13	CCNK	-0.0971197	0.57901	0.872443	6.04535
ENSG00000090097.16	PCBP4	0.174213	0.492799	0.832502	5.27624
ENSG00000090104.7	RGS1	-0.227726	0.748398	0.931785	1.58229
ENSG00000090238.7	YPEL3	0.251068	0.520917	0.84624	3.60416
ENSG00000090263.11	MRPS33	0.521169	0.0196423	0.214496	5.99515
ENSG00000090266.8	NDUFB2	0.462335	0.0837251	0.432201	6.38491
ENSG00000090273.9	NUDC	0.097754	0.666069	0.904082	6.93538
ENSG00000090316.11	MAEA	0.243427	0.159661	0.567162	6.61282
ENSG00000090339.4	ICAM1	0.303036	0.508336	0.839641	1.21414
ENSG00000090372.10	STRN4	-0.0683722	0.738641	0.92861	7.15476
ENSG00000090376.4	IRAK3	0.130612	0.853116	0.959908	-0.693793
ENSG00000090402.3	SI	-0.707268	0.298869	0.706169	3.76527
ENSG00000090432.5	MUL1	0.0213471	0.933248	0.984187	4.86083
ENSG00000090447.7	TFAP4	0.0398251	0.85286	0.959883	5.67265
ENSG00000090470.10	PDCD7	0.201528	0.311982	0.716464	5.14722
ENSG00000090487.6	SPG21	0.000213316	0.999147	0.999448	6.27246
ENSG00000090520.6	DNAJB11	-0.781221	0.0238782	0.237096	6.73963
ENSG00000090530.5	LEPREL1	0.925219	0.139958	0.533484	-0.611435
ENSG00000090539.11	CHRD	-1.93157	8.64762e-05	0.00846195	1.06314
ENSG00000090565.11	RAB11FIP3	0.0720027	0.741988	0.92905	6.83394
ENSG00000090581.5	GNPTG	0.0502534	0.858457	0.962255	5.21597
ENSG00000090612.16	ZNF268	-0.248717	0.249445	0.665584	5.36899
ENSG00000090615.8	GOLGA3	-0.100848	0.588652	0.874968	7.80202
ENSG00000090621.9	PABPC4	0.030593	0.902153	0.976279	7.36343
ENSG00000090661.7	CERS4	0.990659	0.159628	0.567162	2.97228
ENSG00000090674.11	MCOLN1	-0.37044	0.25697	0.672893	4.77628
ENSG00000090686.11	USP48	0.177871	0.349211	0.746514	6.61502
ENSG00000090776.5	EFNB1	0.159229	0.474981	0.824348	3.55412
ENSG00000090857.9	PDPR	-0.013697	0.950499	0.987289	5.43637
ENSG00000090861.11	AARS	-0.570418	0.0483341	0.336412	8.38258
ENSG00000090863.7	GLG1	0.460475	0.0302462	0.265863	6.9369
ENSG00000090889.10	KIF4A	-0.629359	0.247491	0.664187	5.83787
ENSG00000090905.13	TNRC6A	0.434526	0.0287149	0.259822	6.60984
ENSG00000090920.9	FCGBP	1.40334	0.0250403	0.242178	2.18489
ENSG00000090924.10	PLEKHG2	0.377619	0.387691	0.77432	4.47986
ENSG00000090932.6	DLL3	-0.345237	0.521343	0.846583	0.583352
ENSG00000090971.4	NAT14	0.653388	0.0112361	0.163054	3.89477
ENSG00000090975.8	PITPNM2	-0.213597	0.434982	0.803446	4.61253
ENSG00000090989.13	EXOC1	0.0630539	0.734614	0.928159	5.68573
ENSG00000091009.6	RBM27	0.146015	0.42006	0.795131	6.68015
ENSG00000091039.12	OSBPL8	-0.772478	0.0336913	0.2806	8.73252
ENSG00000091073.15	DTX2	0.813778	0.0354211	0.288367	2.02366
ENSG00000091106.14	NLRC4	0.101934	0.814034	0.951601	0.361013
ENSG00000091127.9	PUS7	0.477826	0.0664806	0.391817	6.5486
ENSG00000091128.8	LAMB4	0.118898	0.826203	0.955135	-0.390628
ENSG00000091129.15	NRCAM	0.256605	0.506189	0.838482	2.94122
ENSG00000091136.9	LAMB1	0.651584	0.0186788	0.210659	5.51298
ENSG00000091137.7	SLC26A4	0.387253	0.502714	0.836335	0.608683
ENSG00000091138.8	SLC26A3	1.72445	0.0102507	0.155471	2.55108
ENSG00000091140.8	DLD	0.473899	0.101273	0.465165	7.37457
ENSG00000091157.9	WDR7	-0.454976	0.065919	0.39013	4.99268
ENSG00000091164.8	TXNL1	-0.0373271	0.846368	0.959337	6.44774
ENSG00000091262.10	ABCC6	1.12314	0.00376183	0.0898712	2.29625
ENSG00000091317.7	CMTM6	0.264599	0.28777	0.698323	6.69672
ENSG00000091409.10	ITGA6	1.11836	0.00141615	0.0492218	2.27001
ENSG00000091428.13	RAPGEF4	1.51268	0.0389482	0.305129	-0.438754
ENSG00000091436.12	MLTK	-0.791766	0.0136201	0.180415	4.13808
ENSG00000091483.6	FH	-0.159658	0.555204	0.860786	7.39044
ENSG00000091490.6	SEL1L3	-0.27519	0.495982	0.832795	5.74848
ENSG00000091513.10	TF	1.20969	0.0822071	0.428048	0.171269
ENSG00000091527.11	CDV3	-0.442012	0.0239676	0.237096	7.35609
ENSG00000091536.12	MYO15A	-0.287398	0.526194	0.847622	1.39412
ENSG00000091542.8	ALKBH5	0.0841092	0.66851	0.904756	6.44518
ENSG00000091583.6	APOH	1.70425	0.0251654	0.242565	0.925124
ENSG00000091592.11	NLRP1	1.0582	0.0324497	0.276702	5.85172
ENSG00000091622.11	PITPNM3	0.22193	0.483995	0.827645	2.95413
ENSG00000091640.3	SPAG7	-0.102993	0.604855	0.881201	5.85332
ENSG00000091651.4	ORC6	-0.381729	0.375758	0.765689	5.25034
ENSG00000091656.11	ZFHX4	-0.00698316	0.980394	0.996181	3.99161
ENSG00000091664.7	SLC17A6	-0.346115	0.669812	0.905088	0.460442
ENSG00000091732.11	ZC3HC1	0.426562	0.0671368	0.392518	4.67298
ENSG00000091844.3	RGS17	-0.075185	0.846657	0.959337	2.22658
ENSG00000091879.9	ANGPT2	0.118828	0.834725	0.95671	-0.355192
ENSG00000091947.5	TMEM101	-0.0927445	0.702044	0.918462	4.67657
ENSG00000091986.11	CCDC80	0.392745	0.393021	0.778199	0.684588
ENSG00000092010.10	PSME1	-0.489746	0.119138	0.49619	6.46294
ENSG00000092020.6	PPP2R3C	-0.0927596	0.764072	0.936279	4.47677
ENSG00000092036.12	HAUS4	-0.197883	0.461255	0.816419	3.9822
ENSG00000092051.12	JPH4	0.198621	0.762064	0.935978	-0.923933
ENSG00000092068.14	SLC7A8	0.235559	0.597775	0.877991	4.36702
ENSG00000092094.6	OSGEP	-0.434417	0.0629088	0.381277	5.16594
ENSG00000092096.10	SLC22A17	0.403273	0.312719	0.717117	2.2543
ENSG00000092098.12	RNF31	0.00545125	0.978139	0.995713	4.84228
ENSG00000092108.16	SCFD1	0.124086	0.556671	0.861416	5.98202
ENSG00000092140.10	G2E3	-0.199067	0.537717	0.851933	4.82646
ENSG00000092148.8	HECTD1	-0.165325	0.336322	0.735594	7.86836
ENSG00000092199.13	HNRNPC	0.057548	0.755357	0.933345	8.56272
ENSG00000092200.8	RPGRIP1	-0.191417	0.627825	0.88947	0.690458
ENSG00000092201.5	SUPT16H	-0.0413282	0.838009	0.957168	8.27403
ENSG00000092203.9	TOX4	-0.16691	0.353083	0.74877	6.23594
ENSG00000092208.12	GEMIN2	0.108643	0.726101	0.926135	4.12767
ENSG00000092295.7	TGM1	0.952093	0.00651136	0.124555	2.4891
ENSG00000092330.11	TINF2	-0.494697	0.0248015	0.240684	5.21059
ENSG00000092377.9	TBL1Y	-0.239377	0.69205	0.914923	-0.407853
ENSG00000092421.12	SEMA6A	0.148541	0.61877	0.88593	8.94865
ENSG00000092439.9	TRPM7	-0.0538585	0.824688	0.954797	6.67296
ENSG00000092445.7	TYRO3	0.219157	0.390758	0.776612	5.35667
ENSG00000092470.7	WDR76	-0.810174	0.0916024	0.446457	5.32111
ENSG00000092531.5	SNAP23	0.374561	0.151575	0.554788	4.73438
ENSG00000092607.9	TBX15	1.61911	0.0189534	0.211604	0.083456
ENSG00000092621.7	PHGDH	-0.389472	0.525	0.847418	7.45244
ENSG00000092758.11	COL9A3	1.40551	0.0537285	0.35357	4.26444
ENSG00000092820.13	EZR	-0.667836	0.025463	0.244489	7.49343
ENSG00000092841.14	MYL6	0.206862	0.409405	0.788733	9.11893
ENSG00000092847.6	AGO1	0.0280903	0.8977	0.975662	7.14635
ENSG00000092850.7	TEKT2	1.17596	0.0815084	0.425988	-0.791345
ENSG00000092853.9	CLSPN	-0.636186	0.26325	0.677801	5.6435
ENSG00000092871.12	RFFL	-0.0454668	0.847935	0.959337	4.0742
ENSG00000092929.7	UNC13D	0.426384	0.452886	0.812983	1.36083
ENSG00000092931.7	MFSD11	-0.140228	0.587962	0.874968	4.50879
ENSG00000092964.12	DPYSL2	-0.0534195	0.891283	0.973559	7.43137
ENSG00000092969.7	TGFB2	0.885955	0.166218	0.574617	1.51342
ENSG00000092978.6	GPATCH2	0.118626	0.527961	0.84839	5.54858
ENSG00000093000.14	NUP50	-0.0248119	0.900732	0.976148	6.82921
ENSG00000093009.5	CDC45	-0.544289	0.296096	0.705035	5.99546
ENSG00000093010.7	COMT	-0.0741349	0.745096	0.930484	7.3595
ENSG00000093072.11	CECR1	-0.20862	0.700104	0.918461	6.42866
ENSG00000093100.13	XXbac-B461K10.4	0.486352	0.478326	0.825792	-0.741282
ENSG00000093144.14	ECHDC1	0.122215	0.500823	0.835134	4.73519
ENSG00000093167.13	LRRFIP2	-0.279271	0.131558	0.518493	5.6902
ENSG00000093183.9	SEC22C	-0.33596	0.101931	0.46679	6.23413
ENSG00000093217.5	XYLB	-0.0272685	0.910464	0.977483	4.39174
ENSG00000094631.14	HDAC6	-0.452105	0.0259027	0.246459	5.61881
ENSG00000094804.5	CDC6	-0.58861	0.264313	0.678527	6.27346
ENSG00000094841.9	UPRT	-0.245992	0.237955	0.656176	3.76882
ENSG00000094880.6	CDC23	-0.00913711	0.963042	0.992074	6.09924
ENSG00000094914.8	AAAS	-0.19776	0.354393	0.749723	6.35757
ENSG00000094916.9	CBX5	-0.333226	0.208116	0.625525	9.52207
ENSG00000094975.9	SUCO	-0.577426	0.00477349	0.104483	6.71471
ENSG00000095002.8	MSH2	-0.277183	0.366162	0.758248	5.89158
ENSG00000095015.5	MAP3K1	0.69087	0.00349422	0.0858832	4.73729
ENSG00000095059.11	DHPS	-0.190028	0.314564	0.71854	6.21898
ENSG00000095066.7	HOOK2	0.27854	0.260988	0.675378	6.08027
ENSG00000095139.9	ARCN1	-0.0875056	0.66824	0.904756	7.85287
ENSG00000095203.10	EPB41L4B	-0.322239	0.1786	0.58944	5.68886
ENSG00000095209.7	TMEM38B	0.0970101	0.696358	0.917357	6.00043
ENSG00000095261.9	PSMD5	0.340229	0.0929865	0.448689	5.85345
ENSG00000095303.10	PTGS1	1.2666	0.0299842	0.264422	-0.525062
ENSG00000095319.10	NUP188	-0.00259308	0.992344	0.997746	7.75008
ENSG00000095321.12	CRAT	-0.424828	0.0420069	0.314629	6.45915
ENSG00000095370.15	SH2D3C	0.491673	0.51269	0.841657	-0.0284197
ENSG00000095380.10	NANS	-0.237767	0.349398	0.746675	5.24726
ENSG00000095383.15	TBC1D2	-0.763927	0.0347789	0.28582	2.56807
ENSG00000095397.9	DFNB31	0.930213	0.0773918	0.417519	3.17709
ENSG00000095464.9	PDE6C	0.265395	0.615198	0.884259	0.0271847
ENSG00000095485.12	CWF19L1	-0.251969	0.277386	0.690725	4.56617
ENSG00000095539.11	SEMA4G	0.774273	0.0549884	0.357791	4.75163
ENSG00000095564.9	BTAF1	0.0108025	0.954736	0.988883	6.73474
ENSG00000095574.7	IKZF5	-0.0981558	0.697414	0.917816	4.95604
ENSG00000095585.12	BLNK	0.641699	0.115667	0.490142	2.7726
ENSG00000095587.8	TLL2	1.18119	0.0397108	0.307241	1.03995
ENSG00000095637.16	SORBS1	-0.49883	0.350838	0.74728	4.25075
ENSG00000095739.7	BAMBI	-3.7421	1.84772e-05	0.00291164	3.63494
ENSG00000095752.2	IL11	0.578828	0.320225	0.722451	1.4054
ENSG00000095787.17	WAC	-0.0474143	0.79587	0.946751	7.72672
ENSG00000095794.15	CREM	-0.15122	0.602542	0.880008	3.8809
ENSG00000095906.12	NUBP2	-0.0550518	0.793493	0.945965	5.89528
ENSG00000095932.5	C19orf77	0.841673	0.0837102	0.432201	2.20863
ENSG00000095951.12	HIVEP1	0.429041	0.439983	0.807182	5.43193
ENSG00000096006.7	CRISP3	-1.31406	0.021781	0.227046	1.34646
ENSG00000096060.10	FKBP5	-0.313133	0.481927	0.827163	9.35309
ENSG00000096063.10	SRPK1	0.299024	0.0840701	0.432906	7.19389
ENSG00000096070.15	BRPF3	0.0103357	0.961347	0.991579	6.59487
ENSG00000096080.7	MRPS18A	0.230557	0.39407	0.779085	3.80468
ENSG00000096088.12	PGC	0.294791	0.736573	0.92842	0.950518
ENSG00000096092.5	TMEM14A	-0.434644	0.118535	0.49585	4.68285
ENSG00000096093.10	EFHC1	-0.260355	0.296461	0.705035	5.40532
ENSG00000096384.15	HSP90AB1	0.18483	0.460431	0.816188	10.4178
ENSG00000096401.7	CDC5L	-0.168753	0.396773	0.780494	7.00205
ENSG00000096433.6	ITPR3	-0.27897	0.260634	0.675378	6.89801
ENSG00000096654.11	ZNF184	-0.437981	0.0890697	0.441632	3.95151
ENSG00000096696.9	DSP	0.679311	0.0101144	0.154553	7.68641
ENSG00000096717.7	SIRT1	-0.0977527	0.693933	0.916015	5.4772
ENSG00000096746.13	HNRNPH3	-0.132873	0.47695	0.824851	7.6994
ENSG00000096872.11	IFT74	-0.135331	0.579454	0.872616	5.28479
ENSG00000096968.8	JAK2	-0.29587	0.203983	0.620813	4.48219
ENSG00000097007.13	ABL1	-0.140964	0.496832	0.832795	6.81669
ENSG00000097021.15	ACOT7	-0.461838	0.250108	0.666284	5.3014
ENSG00000097033.10	SH3GLB1	-0.169865	0.498306	0.834146	6.27345
ENSG00000097046.8	CDC7	-0.14417	0.70427	0.919646	5.01552
ENSG00000097096.8	SYDE2	0.389698	0.217066	0.635313	3.77292
ENSG00000099194.5	SCD	-0.500568	0.445888	0.81064	8.92636
ENSG00000099203.2	TMED1	-0.101423	0.679529	0.909959	2.74225
ENSG00000099204.14	ABLIM1	-0.211193	0.314767	0.71854	7.60286
ENSG00000099219.9	ERMP1	-0.146011	0.466245	0.819799	5.96449
ENSG00000099246.12	RAB18	0.0618206	0.770564	0.938161	6.81334
ENSG00000099250.13	NRP1	0.881214	0.0263233	0.2487	4.61202
ENSG00000099251.10	HSD17B7P2	-0.0601576	0.894396	0.975161	1.54816
ENSG00000099256.14	PRTFDC1	1.55216	0.00971817	0.15144	2.68822
ENSG00000099260.6	PALMD	-0.0423666	0.919783	0.980336	3.30788
ENSG00000099282.5	TSPAN15	0.234233	0.608977	0.882433	4.62153
ENSG00000099284.9	H2AFY2	0.23683	0.380433	0.769449	5.46029
ENSG00000099290.11	FAM21A	-0.00816056	0.978744	0.995923	2.35438
ENSG00000099308.6	MAST3	0.631537	0.00795983	0.138049	4.62176
ENSG00000099326.4	MZF1	0.109715	0.687326	0.912929	5.5513
ENSG00000099330.4	OCEL1	0.062091	0.803489	0.948742	3.42492
ENSG00000099331.9	MYO9B	0.128091	0.545356	0.856968	6.33038
ENSG00000099337.3	KCNK6	0.693119	0.150007	0.552472	0.369978
ENSG00000099338.18	CATSPERG	1.50252	0.0066575	0.125383	2.2566
ENSG00000099341.7	PSMD8	0.484698	0.178381	0.589256	7.55619
ENSG00000099364.12	FBXL19	0.313619	0.188076	0.600698	4.87616
ENSG00000099365.5	STX1B	1.63688	0.0792753	0.421502	-0.266698
ENSG00000099377.9	HSD3B7	0.433223	0.112011	0.484393	4.95191
ENSG00000099381.12	SETD1A	-0.0133958	0.943225	0.985257	6.25733
ENSG00000099385.7	BCL7C	-0.133011	0.609324	0.882739	5.21901
ENSG00000099617.2	EFNA2	-0.289873	0.596901	0.877774	2.1998
ENSG00000099622.9	CIRBP	-0.128465	0.589106	0.874968	7.68347
ENSG00000099624.3	ATP5D	0.294887	0.165987	0.574617	7.22374
ENSG00000099625.8	C19orf26	0.755708	0.0226357	0.231957	4.35231
ENSG00000099715.10	PCDH11Y	-1.0479	0.0491557	0.339245	-0.0595584
ENSG00000099725.10	PRKY	0.806095	0.0429557	0.317814	3.94366
ENSG00000099769.5	IGFALS	0.246558	0.541588	0.855382	0.576861
ENSG00000099783.7	HNRNPM	-0.0894516	0.701659	0.918461	8.79306
ENSG00000099785.6	MARCH2	-0.107629	0.75326	0.932501	4.45324
ENSG00000099795.2	NDUFB7	0.0646312	0.775356	0.940156	5.96637
ENSG00000099797.7	TECR	-0.223884	0.45357	0.812995	5.58849
ENSG00000099800.3	TIMM13	0.234661	0.334958	0.733972	5.8893
ENSG00000099804.4	CDC34	0.242288	0.24602	0.66263	5.62736
ENSG00000099810.14	MTAP	-0.189511	0.388264	0.774537	5.83755
ENSG00000099812.6	MISP	2.4544	2.39234e-05	0.00354475	3.92564
ENSG00000099814.11	CEP170B	0.247008	0.230632	0.648411	7.67642
ENSG00000099817.7	POLR2E	-0.0655242	0.760398	0.935074	7.00754
ENSG00000099821.9	POLRMT	0.228369	0.232436	0.650569	6.03853
ENSG00000099822.2	HCN2	-0.0252773	0.920556	0.980636	5.10368
ENSG00000099834.14	CDHR5	0.0987781	0.819717	0.953268	3.02535
ENSG00000099840.9	IZUMO4	0.442161	0.322548	0.724799	2.01279
ENSG00000099849.10	RASSF7	0.353897	0.115506	0.490142	5.72904
ENSG00000099860.4	GADD45B	0.0928693	0.895727	0.975318	5.09813
ENSG00000099864.13	PALM	0.829157	0.0877325	0.440531	4.3613
ENSG00000099866.10	MADCAM1	-0.258807	0.598432	0.878301	0.801867
ENSG00000099875.10	MKNK2	-0.214639	0.363836	0.75671	7.71777
ENSG00000099889.9	ARVCF	0.248607	0.313254	0.717665	5.83605
ENSG00000099899.10	TRMT2A	0.296273	0.170007	0.580313	5.0256
ENSG00000099901.12	RANBP1	-0.105251	0.689261	0.913821	7.06796
ENSG00000099904.11	ZDHHC8	0.42881	0.19084	0.604498	5.46028
ENSG00000099910.12	KLHL22	-0.197226	0.351641	0.748004	4.79711
ENSG00000099917.13	MED15	0.0734969	0.709713	0.921495	5.73288
ENSG00000099937.6	SERPIND1	0.161219	0.813888	0.951498	-0.632027
ENSG00000099940.7	SNAP29	-0.442891	0.0160502	0.195124	5.73962
ENSG00000099942.8	CRKL	0.0129436	0.94926	0.987242	6.87084
ENSG00000099949.14	LZTR1	0.0440693	0.857299	0.962195	6.27603
ENSG00000099953.5	MMP11	0.454719	0.267016	0.680821	1.89565
ENSG00000099954.14	CECR2	1.22233	0.00746938	0.1333	2.20449
ENSG00000099956.13	SMARCB1	0.0280393	0.895663	0.975318	7.1256
ENSG00000099957.12	P2RX6	0.548233	0.231211	0.649218	3.37474
ENSG00000099958.10	DERL3	-1.37072	0.00445774	0.0996505	4.78552
ENSG00000099960.8	SLC7A4	0.405979	0.525593	0.847418	-0.428685
ENSG00000099968.13	BCL2L13	0.199312	0.327518	0.728103	6.5722
ENSG00000099974.7	DDTL	0.288465	0.428902	0.800761	1.50293
ENSG00000099991.12	CABIN1	0.112748	0.588709	0.874968	6.78286
ENSG00000099992.11	TBC1D10A	0.0846047	0.770993	0.938285	3.0588
ENSG00000099994.10	SUSD2	0.0549701	0.905064	0.977075	1.19488
ENSG00000099995.14	SF3A1	-0.0731117	0.684049	0.912001	7.68974
ENSG00000099999.10	RNF215	-0.0054343	0.984726	0.996848	4.12737
ENSG00000100003.13	SEC14L2	0.0518752	0.846951	0.959337	3.48634
ENSG00000100014.15	SPECC1L	0.378996	0.085574	0.43624	5.43505
ENSG00000100023.13	PPIL2	-0.0942458	0.606932	0.881453	6.30245
ENSG00000100024.10	UPB1	-0.0438503	0.942945	0.985184	-0.432472
ENSG00000100027.10	YPEL1	-1.26072	0.00659631	0.125286	1.58971
ENSG00000100028.7	SNRPD3	-0.157546	0.360199	0.754451	6.94785
ENSG00000100029.13	PES1	0.0980396	0.643973	0.895859	6.70013
ENSG00000100030.10	MAPK1	-0.126673	0.499787	0.834326	7.72308
ENSG00000100031.14	GGT1	-0.0291185	0.934974	0.98444	4.92607
ENSG00000100033.12	PRODH	1.28196	0.0270488	0.25262	0.739396
ENSG00000100034.9	PPM1F	0.416688	0.0647091	0.385935	5.45082
ENSG00000100036.11	SLC35E4	0.03893	0.912637	0.978158	1.3236
ENSG00000100038.15	TOP3B	0.253618	0.343406	0.74133	4.77602
ENSG00000100056.7	DGCR14	-0.192157	0.373661	0.763619	4.58693
ENSG00000100058.8	CRYBB2P1	0.13699	0.652503	0.89782	3.57795
ENSG00000100060.13	MFNG	0.497604	0.224675	0.640985	1.15158
ENSG00000100065.10	CARD10	0.207238	0.584032	0.874274	5.09066
ENSG00000100068.7	LRP5L	0.801567	0.0280591	0.256968	2.27757
ENSG00000100075.5	SLC25A1	-0.348471	0.206264	0.623172	7.39986
ENSG00000100077.10	ADRBK2	0.453841	0.0450536	0.32484	4.49298
ENSG00000100078.3	PLA2G3	0.0412924	0.937037	0.984611	6.99421
ENSG00000100083.14	GGA1	-0.0213192	0.906078	0.977079	6.5121
ENSG00000100084.10	HIRA	0.169524	0.419481	0.795111	4.46727
ENSG00000100092.16	SH3BP1	0.017073	0.955527	0.989224	4.54934
ENSG00000100097.7	LGALS1	0.019216	0.977894	0.995713	5.78141
ENSG00000100099.16	HPS4	-0.152675	0.495	0.832795	5.6591
ENSG00000100100.8	PIK3IP1	0.517046	0.167007	0.575586	4.28328
ENSG00000100101.13	NOL12	-0.13109	0.538246	0.852464	4.85312
ENSG00000100104.8	SRRD	-0.105805	0.609218	0.882654	4.33204
ENSG00000100105.13	PATZ1	0.181901	0.47458	0.824348	5.98835
ENSG00000100106.15	TRIOBP	-0.164048	0.526992	0.847825	4.03059
ENSG00000100109.12	TFIP11	-0.115171	0.566031	0.867094	4.73788
ENSG00000100116.12	GCAT	-0.064634	0.834142	0.95671	5.10796
ENSG00000100124.8	ANKRD54	-0.0605694	0.773675	0.93925	5.14923
ENSG00000100129.13	EIF3L	0.080274	0.782064	0.942218	8.4777
ENSG00000100138.9	NHP2L1	0.113494	0.56159	0.86515	6.92107
ENSG00000100139.9	MICALL1	0.300582	0.310762	0.715796	5.68941
ENSG00000100142.10	POLR2F	0.50049	0.0165524	0.197501	5.15635
ENSG00000100147.9	CCDC134	0.44691	0.208873	0.626285	2.42475
ENSG00000100150.12	DEPDC5	-0.112619	0.669328	0.905088	4.18786
ENSG00000100151.11	PICK1	-0.101095	0.653487	0.8981	6.05028
ENSG00000100154.10	TTC28	-0.448204	0.332823	0.732461	3.95566
ENSG00000100156.6	SLC16A8	0.100294	0.81293	0.951083	4.37485
ENSG00000100162.10	CENPM	-0.34852	0.488565	0.829676	4.63072
ENSG00000100167.15	SEPT3	0.27169	0.469685	0.82165	5.37348
ENSG00000100170.5	SLC5A1	1.6271	0.0136976	0.180721	-0.32003
ENSG00000100181.17	TPTEP1	-0.0880043	0.661062	0.901937	5.61687
ENSG00000100191.4	SLC5A4	1.03017	0.0173378	0.20216	1.02274
ENSG00000100196.6	KDELR3	0.0222634	0.947798	0.986572	2.80713
ENSG00000100197.16	CYP2D6	0.136856	0.735458	0.928159	2.0212
ENSG00000100201.14	DDX17	0.150112	0.59537	0.877374	9.54128
ENSG00000100206.5	DMC1	-1.3167	0.0121799	0.170502	2.04076
ENSG00000100207.14	TCF20	0.0902795	0.660783	0.901937	6.7399
ENSG00000100209.5	HSCB	0.423941	0.0859208	0.43708	3.10249
ENSG00000100211.6	CBY1	0.187484	0.346906	0.744777	4.55471
ENSG00000100216.4	TOMM22	0.272503	0.2412	0.659233	6.67819
ENSG00000100218.7	RTDR1	-0.15446	0.766924	0.937135	-0.21929
ENSG00000100219.12	XBP1	-0.542491	0.013676	0.180721	7.62132
ENSG00000100220.7	RTCB	0.0104544	0.960598	0.991441	6.37984
ENSG00000100221.6	JOSD1	-0.701228	0.00417804	0.0956446	6.16041
ENSG00000100225.13	FBXO7	-0.124677	0.479752	0.826096	6.68026
ENSG00000100226.11	GTPBP1	-0.32519	0.17527	0.586483	6.20239
ENSG00000100227.13	POLDIP3	-0.125171	0.527532	0.848146	6.67478
ENSG00000100228.8	RAB36	0.0589024	0.885331	0.9716	4.55356
ENSG00000100234.11	TIMP3	1.75954	0.0245913	0.239927	-0.503646
ENSG00000100239.11	PPP6R2	0.270928	0.259118	0.674526	6.71185
ENSG00000100241.16	SBF1	-0.0426132	0.850366	0.959535	7.64076
ENSG00000100242.11	SUN2	-0.424027	0.0454025	0.325899	6.3628
ENSG00000100243.16	CYB5R3	-0.00689227	0.978912	0.995947	6.9837
ENSG00000100246.8	DNAL4	-0.105366	0.674032	0.906917	4.77894
ENSG00000100253.8	MIOX	-0.395862	0.484302	0.82784	-0.347361
ENSG00000100258.13	LMF2	-0.785226	0.000634492	0.0307741	6.7218
ENSG00000100263.9	RHBDD3	0.161221	0.496704	0.832795	4.95021
ENSG00000100266.13	PACSIN2	-0.36647	0.118709	0.496048	7.04815
ENSG00000100271.12	TTLL1	-0.213376	0.567565	0.867608	2.95354
ENSG00000100276.9	RASL10A	-0.195544	0.701351	0.918461	-0.0116227
ENSG00000100280.12	AP1B1	0.135818	0.588691	0.874968	7.52922
ENSG00000100281.9	HMGXB4	-0.103828	0.605065	0.881201	6.32689
ENSG00000100284.16	TOM1	-0.129972	0.644248	0.895859	4.83095
ENSG00000100285.9	NEFH	-0.678705	0.379555	0.768971	6.49246
ENSG00000100288.15	CHKB	0.125115	0.734382	0.928159	1.82517
ENSG00000100290.2	BIK	-0.0492547	0.851014	0.959773	2.90248
ENSG00000100292.12	HMOX1	2.42231	0.0271104	0.252863	4.74514
ENSG00000100294.8	MCAT	0.181391	0.391952	0.777208	4.66579
ENSG00000100296.9	THOC5	0.157635	0.406203	0.786812	5.59399
ENSG00000100297.11	MCM5	-0.519593	0.221902	0.638684	7.14502
ENSG00000100298.11	APOBEC3H	1.58392	0.0320385	0.274133	-0.988835
ENSG00000100299.13	ARSA	-0.0883573	0.739987	0.928729	5.70772
ENSG00000100300.13	TSPO	0.0406045	0.875749	0.968569	6.20834
ENSG00000100302.6	RASD2	-0.0392153	0.936101	0.984586	0.0132798
ENSG00000100304.12	TTLL12	0.344002	0.16708	0.575638	6.72469
ENSG00000100307.8	CBX7	-0.416897	0.0974694	0.457485	5.67256
ENSG00000100311.12	PDGFB	-0.054212	0.842399	0.958672	4.17422
[truncated: 17,963 more rows]
