# Supplementary material for: CRISPR-mediated deletion of prostate cancer risk-associated CTCF loop anchors identifies repressive chromatin loops
Source: Genome Biol. 2018 Oct 8;19:160. doi: 10.1186/s13059-018-1531-0 (PMC6176514; doi:10.1186/s13059-018-1531-0)
Supplement: Supplementary file 7 — Table S6. Predicted genes regulated by PCa-related K27Ac sites. (XLSX 11 kb) [file 13059_2018_1531_MOESM7_ESM.xlsx]

## Sheet: Sheet1
SNP*	Enhancer location			Looped gene**
	Chr	Start	End
rs10908445,rs12069356	chr1	154849564	154850407	UBE2Q1,RP11-350G8.9,TDRD10,ADAR,CHRNB2,RP11-61L14.6,UBE2Q1-AS1,KCNN3,SHE,AL606500.1
rs11240753,rs11240754,rs4951389	chr1	204474823	204478037	No promoter loops
rs4245736,rs4951391,rs4951392	chr1	204484474	204486668	No promoter loops
rs11043132,rs11043133,rs11043135,rs11603101,rs7121039	chr11	2232428	2232969	ASCL2
rs11820019,rs144245804,rs180898041,rs184379418,rs191958513,rs3212859,rs3212880,rs36225067,rs36225073,rs3862792,rs3918296,rs3918298,rs55816909,rs55911137,rs74606104,rs76941912	chr11	69448299	69472254	MYEOV,TPCN2,RP11-554A11.7,MIR3164,AP000439.5,IFITM9P,RP11-554A11.9,RP11-554A11.8
rs4919707	chr12	53288877	53290929	AC107016.2,AC107016.1,KRT82,KRT84,KRT85,KRT18,RP11-1020M18.10,KRT8,EIF4B
rs13098,rs55958994	chr12	53296493	53302895	KRT85
rs7327286	chr13	73712720	73713564	No promoter loops
rs7158115	chr14	53417076	53419118	RNA5SP384,RP11-589M4.3
rs461251,rs684232	chr17	618340	619783	AC108004.3,AC108004.2,DOC2B,AC108004.5,RPH3AL,C17orf97,RP11-1260E13.4,NXN,TIMM22,AC015884.1
rs16948071,rs57030023,rs77653195,rs8072520	chr17	47466463	47469298	RNU7-135P
rs11653701,rs11653775	chr17	47472072	47472395	RNU7-135P,AC006487.1
rs17765332,rs17765344,rs1859962,rs8071558,rs8072254,rs984434,rs9901566,rs9908087,rs991429	chr17	69105863	69110755	RP11-57A1.1,SLC39A11,AC007461.2,AC007461.1,COG1,AC005152.3,AC005152.2,SOX9,RP11-84E24.2,RP11-84E24.3,RP11-1124B17.1,LINC00511
rs7591175	chr2	85737695	85739360	SH2D6,Y_RNA,RNU7-64P,RN7SL251P,CAPG
rs1446668,rs2028900	chr2	85764672	85768996	RETSAT,SH2D6,RN7SL113P,RN7SL251P,RP11-717A5.1,Y_RNA,ELMOD3,RNU7-162P,RNU7-64P,CAPG
rs12473819,rs7605975	chr2	85772292	85774674	PEBP1P2,AC013262.1,RETSAT,SH2D6,RN7SL113P,RN7SL251P,AC105342.1,RP11-717A5.1,RP11-717A5.2,AC012075.2,ELMOD3,RNU7-162P,Y_RNA,RNU7-64P,CAPG
rs10172544,rs7568458	chr2	85788025	85789341	PEBP1P2,RETSAT,SH2D6,RN7SL113P,TGOLN2,RN7SL251P,ELMOD3,RP11-717A5.2,RP11-717A5.1,Y_RNA,AC012075.1,RNU7-162P,RNU7-64P,CAPG
rs10187185,rs13386290,rs13408361,rs1463795,rs2292879,rs2325839,rs3087553,rs58057291,rs6431544,rs67071074,rs6724766,rs6737888,rs6760842,rs7569197,rs7571898,rs7583768	chr2	238382258	238425384	COPS8,PTMA,CAB39,PRLH,MGC4771,RAB17,COL6A3,MSL3P1,RNU6-1140P
rs10176842,rs10184904	chr2	238426998	238430490	AC107079.1
rs10186470,rs11891348,rs11896232,rs12471291,rs13404177,rs13409241,rs13418586,rs13425580,rs13426236,rs13429533,rs1979762,rs2271809,rs2292884,rs2292885,rs7570882,rs7574337,rs7586312,rs7609087	chr2	238431100	238451177	AC107079.1
rs111770284,rs76832527	chr2	242156584	242157281	PPP1R7,PASK,AC005237.2
rs2258056	chr20	62328118	62328734	SAMD10,ZNF512B
rs1056441,rs1741708,rs2253823,rs2253829,rs6122159	chr20	62370127	62373695	No promoter loops
rs7632756	chr3	127816706	127817724	RP11-475N22.4,C3orf27,GATA2
rs2871960	chr3	141120545	141122111	No promoter loops
rs1534642	chr4	74485765	74486701	No promoter loops
rs17021972,rs998071	chr4	95589491	95592862	BMPR1B
rs4714476,rs6935446,rs6935737,rs9381075	chr6	41513420	41515237	No promoter loops
rs10486567,rs17156041,rs67152137	chr7	27975464	27977211	HOXA11-AS,HOTTIP,MIR196B,HOXA13,HOXA11,HOXA10,RP1-170O19.17,RP1-170O19.20,RP1-170O19.14,HOXA-AS4,RPL35P4,HOXA9
rs11135756,rs11135757,rs13264646,rs13264869,rs1355600,rs4872162,rs6980627,rs6981463,rs7001308,rs7016506,rs715725	chr8	23448031	23450837	RP11-175E9.1,NKX2-6,RP11-213G6.2
rs11135766,rs13262167,rs4872175	chr8	23533575	23541498	FP15737,AC051642.1,SLC25A37,ENTPD4,CTC-756D1.1,CTC-756D1.3,CTC-756D1.2
rs115266272,rs13254738,rs1456315,rs148663063,rs7001895,rs7012442,rs72725879	chr8	128102256	128106799	No promoter loops
rs145698299,rs57010632,rs61265543	chr8	128110667	128114831	No promoter loops
rs1984037,rs34251673,rs71509575	chr9	124424865	124426784	No promoter loops
rs5964602	chrX	66742239	66748595	RP6-22P16.1
rs1204038,rs1204039,rs1204040,rs12396249,rs2255702,rs2361629,rs2767564,rs5918757,rs6152	chrX	66761237	66809011	No promoter loops
rs5919393	chrX	66822818	66826149	No promoter loops
* PCa fine-mapped risk SNPs that fall within the genomic region shown for each H3K27Ac peak.
** Genes whose promoter is in a chromatin loop with the indicated enhancers in 22Rv1 cells
